# Supplementary material for: Chemoselective N-arylation of aminobenzene sulfonamides via copper catalysed Chan–Evans–Lam reactions
Source: Royal Society of Chemistry journal article supplement (doi:10.1039/c8qo01313f), 2019-01-01

## Supporting Information

### Chemoselective *N*-arylation of Aminobenzene Sulfonamides via Copper Catalysed Chan–Evans–Lam Reactions

Weisai Zu,<sup>a</sup> Shuai Liu,<sup>a</sup> Xin Jia<sup>\*a</sup> and Liang Xu<sup>\*a</sup>

#### Table of Contents

|                                                                                                                         |    |
|-------------------------------------------------------------------------------------------------------------------------|----|
| 1. General considerations .....                                                                                         | 2  |
| 2. Selective <i>N</i> -arylation reaction under Cu catalysis .....                                                      | 3  |
| A. General procedure and experimental data for Cu-catalysed selective arylation of 2-aminobenzenesulfonamides .....     | 3  |
| B. Separation of different products of Cu-catalyzed reaction of 2-aminobenzenesulfonamide with phenylboronic acid ..... | 12 |
| C. Reactions between 3- or 4-aminobenzene sulfonamide with arylboronic acids .....                                      | 14 |
| D. Arylation of phenylamino of 2 or 3- aminobenzenesulfonamide with aryl boronic acid .....                             | 19 |
| E. Cu-catalyzed selective arylation of aminobenzenesulfonamide on larger scale .....                                    | 25 |
| F. Control experiments .....                                                                                            | 26 |
| 3. Copies of NMR spectra .....                                                                                          | 28 |

## 1. General considerations

**General.** Unless otherwise noted, all reactions were carried out under an air atmosphere. Analytical thin-layer chromatography (TLC) was performed on glass plates coated with 0.25 mm 230–400 mesh silica gel containing a fluorescent indicator. Visualization was accomplished by exposure to a UV lamp. All the products in this article are compatible with standard silica gel chromatography. Column chromatography was performed on silica gel (200–300 mesh) using standard methods.

**Structural analysis.** NMR spectra were measured on a Bruker Ascend 400 spectrometer and chemical shifts ( $\delta$ ) are reported in parts per million (ppm).  $^1\text{H}$  NMR spectra were recorded at 400 MHz in NMR solvents and referenced internally to corresponding solvent resonance, and  $^{13}\text{C}$  NMR spectra were recorded at 100 MHz and referenced to corresponding solvent resonance. Coupling constants are reported in Hz with multiplicities denoted as s (singlet), d (doublet), t (triplet), q (quartet), m (multiplet) and br (broad). Infrared spectra were collected on a Thermo Fisher Nicolet 6700 FT-IR spectrometer using ATR (Attenuated Total Reflectance) method. Absorption maxima ( $\nu_{\text{max}}$ ) are reported in wavenumbers ( $\text{cm}^{-1}$ ). High resolution mass spectra (HRMS) were acquired on Thermo Scientific LTQ Orbitrap XL with an ESI source.

**Materials.** Commercial reagents and solvent were purchased from Adamas, J&K, Energy, Sigma-Aldrich, Alfa Aesar, Acros Organics, TCI and used as received unless otherwise stated.

## 2. Selective N-arylation reaction under Cu catalysis

### A. General procedure and experimental data for Cu-catalysed selective arylation of 2-aminobenzenesulfonamides

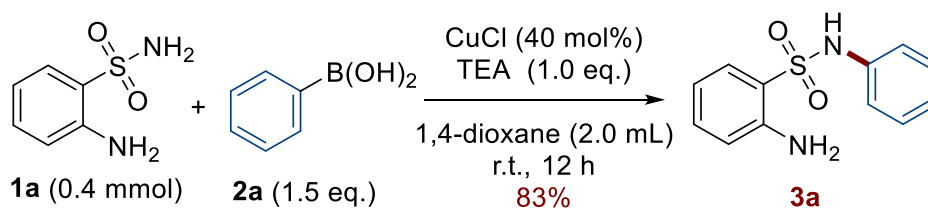

General procedure A: A flame-dried 100 mL column reaction flask was placed with a stirring bar. Then, 2-aminobenzenesulfonamide **1a** (68.9 mg, 0.4 mmol, 1.0 eq.), CuCl (15.8 mg, 0.16 mmol, 40 mol%), Et<sub>3</sub>N (56.0  $\mu$ L, 0.4 mmol, 1.0 eq.), arylboronic acid (0.6 mmol, 1.5 eq.), and 1,4-dioxane (2.0 mL) were added. The resulting mixture was stirred vigorously at ambient temperature for 12 hours. The reaction mixture was filtered, concentrated and then purified by column chromatography on silica gel to give the target product.

**(3a) 2-amino-N-phenylbenzenesulfonamide (CAS: 27332-20-3)**

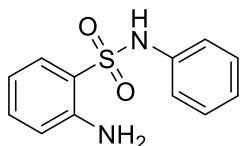

2-amino-N-phenylbenzenesulfonamide

Chemical Formula: C<sub>12</sub>H<sub>12</sub>N<sub>2</sub>O<sub>2</sub>S

Exact Mass: 248.0619

Molecular Weight: 248.3000

The general procedure A was followed using phenylboronic acid (73.2 mg, 0.6 mmol) as starting material. **3a** was obtained as brown solid (82.8 mg, 83%) after purification by silica gel flash chromatography (PE:EA:MeOH = 3:1:0.2).

**3a** (*Molecules* **2013**, *18*, 894-913)

Melting point (°C): 111.2-117.1.

<sup>1</sup>H NMR (400 MHz, DMSO-*d*<sub>6</sub>) δ 10.21 (s, 1H), 7.49 (dd, *J* = 8.0, 1.6 Hz, 1H), 7.20 (t, *J* = 8.0 Hz, 3H), 7.04 (m, 2H), 7.01 – 6.92 (m, 1H), 6.74 (dd, *J* = 8.4, 0.8 Hz, 1H), 6.59 – 6.46 (m, 1H), 5.99 (s, 2H).

<sup>13</sup>C NMR (101 MHz, DMSO-*d*<sub>6</sub>) δ 146.84, 138.22, 134.37, 130.05, 129.54, 123.95, 119.51, 119.02, 117.36, 115.38.

**(3b) 2-amino-N-(p-tolyl)benzenesulfonamide (CAS: 27384-96-9)**

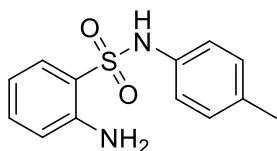

2-amino-N-(p-tolyl)benzenesulfonamide

Chemical Formula: C<sub>13</sub>H<sub>14</sub>N<sub>2</sub>O<sub>2</sub>S

Exact Mass: 262.0776

Molecular Weight: 262.3270

The general procedure A was followed using p-tolylboronic acid (81.6 mg, 0.6 mmol) as starting material. **3b** was obtained as brown solid (88.5 mg, 84%) after purification by silica gel flash chromatography (PE:EA:MeOH = 3:1:0.2).

Melting point (°C): 124.3-128.2.

<sup>1</sup>H NMR (400 MHz, DMSO-*d*<sub>6</sub>) δ 10.03 (s, 1H), 7.44 (dd, *J* = 8.0, 1.2 Hz, 1H), 7.19 (m, 1H), 7.00 (d, *J* = 8.0 Hz, 2H), 6.96 – 6.88 (m, 2H), 6.73 (dd, *J* = 8.4, 0.6 Hz, 1H), 6.52 (m, 1H), 5.97 (s, 2H), 2.16 (s, 3H).

<sup>13</sup>C NMR (101 MHz, DMSO-*d*<sub>6</sub>) δ 146.82, 135.52, 134.27, 133.28, 130.05, 129.95, 120.20, 119.09, 117.30, 115.34, 20.73.

HRMS (ESI) *m/z* calcd for C<sub>13</sub>H<sub>15</sub>N<sub>2</sub>O<sub>2</sub>S<sup>+</sup> (*M*+H)<sup>+</sup> 263.0849, found 263.0851.

IR (cm<sup>-1</sup>): 3458, 3374, 3244, 1618, 1559, 1451, 1132, 846, 760.

**(3c) 2-amino-N-(4-ethylphenyl)benzenesulfonamide (CAS: 953730-44-4)**

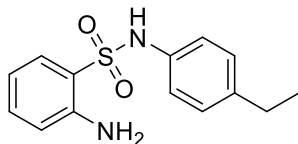

2-amino-N-(4-

ethylphenyl)benzenesulfonamide

Chemical Formula: C<sub>14</sub>H<sub>16</sub>N<sub>2</sub>O<sub>2</sub>S

Exact Mass: 276.0932

Molecular Weight: 276.3540

The general procedure A was followed using (4-ethylphenyl)boronic acid (90.0 mg, 0.6 mmol) as starting material. **3c** was obtained as grey solid (75.1 mg, 68%) after purification by silica gel flash chromatography (PE:EA:MeOH = 3:1:0.2).

Melting point (°C): 92.3-93.9.

<sup>1</sup>H NMR (400 MHz, DMSO-*d*<sub>6</sub>) δ 10.06 (s, 1H), 7.46 (dd, *J* = 8.0, 1.6 Hz, 1H), 7.25 – 7.13 (m, 1H), 7.03 (d, *J* = 8.6 Hz, 2H), 6.95 (d, *J* = 8.2 Hz, 2H), 6.73 (dd, *J* = 8.2, 0.8 Hz, 1H), 6.58 – 6.48 (m, 1H), 5.97 (s, 2H), 2.47 (q, *J* = 7.6 Hz, 2H), 1.08 (t, *J* = 7.6 Hz, 3H).

<sup>13</sup>C NMR (101 MHz, DMSO-*d*<sub>6</sub>) δ 146.82, 139.53, 135.75, 134.27, 130.02, 128.77, 120.02, 119.19, 117.33, 115.36, 27.85, 15.94.

HRMS (ESI)  $m/z$  calcd for  $C_{14}H_{17}N_2O_2S^+$  ( $M+H$ ) $^+$  277.1005, found 277.1010.

IR ( $cm^{-1}$ ): 3468, 3379, 3242, 1617, 1596, 1133, 760, 728.

**(3d) 2-amino-N-(4-(tert-butyl)phenyl)benzenesulfonamide (CAS: 1040010-61-4)**

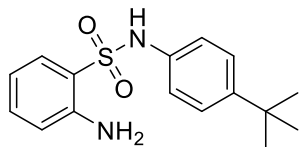

2-amino-N-(4-(tert-butyl)phenyl)benzenesulfonamide

Chemical Formula:  $C_{16}H_{20}N_2O_2S$

Exact Mass: 304.1245

Molecular Weight: 304.4080

The general procedure A was followed using 4-(tert-butyl)phenylboronic acid (106.8 mg, 0.6 mmol) as starting material. **3d** was obtained as white solid (88.0 mg, 72%) after purification by silica gel flash chromatography (PE:EA:MeOH = 3:1:0.2).

Melting point ( $^{\circ}C$ ): 206.5-211.5.

$^1H$  NMR (400 MHz,  $DMSO-d_6$ )  $\delta$  10.12 (s, 1H), 7.50 (dd,  $J$  = 8.0, 1.6 Hz, 1H), 7.28 – 7.14 (m, 3H), 7.01 – 6.90 (m, 2H), 6.74 (dd,  $J$  = 8.0, 0.8 Hz, 1H), 6.59 –

6.49 (m, 1H), 5.98 (s, 2H), 1.18 (s, 9H).

$^{13}C$  NMR (101 MHz,  $DMSO-d_6$ )  $\delta$  146.82, 146.21, 135.58, 134.29, 129.99, 126.24, 119.42, 119.21, 117.38, 115.41, 34.38, 31.57.

HRMS (ESI)  $m/z$  calcd for  $C_{16}H_{21}N_2O_2S^+$  ( $M+H$ ) $^+$  305.1318, found 305.1321.

IR ( $cm^{-1}$ ): 3497, 3393, 3237, 1617, 1451, 1134, 908, 858.

**(3e) 2-amino-N-(4-(trimethylsilyl)phenyl)benzenesulfonamide**

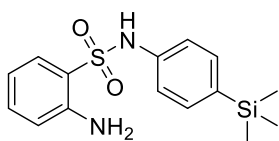

2-amino-N-(4-(trimethylsilyl)phenyl)benzenesulfonamide

Chemical Formula:  $C_{15}H_{20}N_2O_2SSi$

Exact Mass: 320.1015

Molecular Weight: 320.4820

The general procedure A was followed using 4-(trimethylsilyl)phenylboronic acid (116.5 mg, 0.6 mmol) as starting material. **3e** was obtained as grey solid (86.7 mg, 68%) after purification by silica gel flash chromatography (PE:EA:MeOH = 3:1:0.2).

Melting point ( $^{\circ}C$ ): 162.5-165.4.

$^1H$  NMR (400 MHz,  $DMSO-d_6$ )  $\delta$  10.30 (s, 1H), 7.53 (dd,  $J$  = 8.0, 1.6 Hz, 1H), 7.39 – 7.28 (m, 2H), 7.20 (m, 1H), 7.03 (d,  $J$  = 8.4 Hz, 2H), 6.74 (dd,

$J$  = 8.4, 0.8 Hz, 1H), 6.60 – 6.50 (m, 1H), 5.99 (s, 2H), 0.15 (s, 9H).

$^{13}C$  NMR (101 MHz,  $DMSO-d_6$ )  $\delta$  146.97, 139.10, 134.68, 134.54, 134.25, 130.17, 119.27, 118.27, 117.54, 115.56, -0.50.

HRMS (ESI)  $m/z$  calcd for  $C_{15}H_{21}N_2O_2SSi^+$  ( $M+H$ ) $^+$  321.1087, found 321.1090.

IR ( $cm^{-1}$ ): 3496, 3393, 3245, 1617, 1483, 1136, 835, 757.

**(3f) 2-amino-N-(4-methoxyphenyl)benzenesulfonamide (CAS: 33224-44-1)**

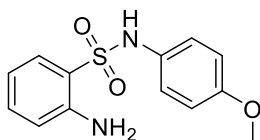

2-amino-N-(4-methoxyphenyl)benzenesulfonamide

Chemical Formula:  $C_{13}H_{14}N_2O_3S$

Exact Mass: 278.0725

Molecular Weight: 278.3260

The general procedure A was followed using 4-methoxyphenylboronic acid (91.2 mg, 0.6 mmol) as starting material. **3f** was obtained as grey solid (70.1 mg, 63%) after purification by silica gel flash chromatography (PE:EA:MeOH = 3:1:0.2).

Melting point ( $^{\circ}C$ ): 94.4-97.7.

$^1\text{H}$  NMR (400 MHz,  $\text{CDCl}_3$ )  $\delta$  7.41 (dd,  $J$  = 8.0, 1.2 Hz, 1H), 7.29 – 7.23 (m, 1H), 6.96 – 6.91 (m, 2H), 6.79 – 6.68 (m, 4H), 6.68 – 6.61 (m, 1H), 4.85 (s, 2H), 3.72 (s, 3H).

$^{13}\text{C}$  NMR (101 MHz,  $\text{CDCl}_3$ )  $\delta$  158.24, 144.95, 134.34, 130.04, 128.68, 126.25, 120.92, 117.89, 117.58, 114.27, 55.38.

HRMS (ESI)  $m/z$  calcd for  $\text{C}_{13}\text{H}_{15}\text{N}_2\text{O}_3\text{S}^+$  ( $\text{M}+\text{H}$ ) $^+$  279.0798, found 279.0801.

IR ( $\text{cm}^{-1}$ ): 3475, 3369, 3271, 1610, 1507, 1479, 1453, 1393, 935.

**(3g) 2-amino-N-(4-(methylthio)phenyl)benzenesulfonamide (CAS: 1016512-06-3)**

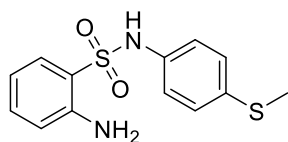

2-amino-*N*-(4-(methylthio)phenyl)benzenesulfonamide  
Chemical Formula:  $\text{C}_{13}\text{H}_{14}\text{N}_2\text{O}_2\text{S}_2$

Exact Mass: 294.0497

Molecular Weight: 294.3870

The general procedure A was followed using (4-(methylthio)phenyl)boronic acid (100.8 mg, 0.6 mmol) as starting material. **3g** was obtained as grey solid (76.7 mg, 65%) after purification by silica gel flash chromatography (PE:EA:MeOH = 3:1:0.2).

Melting point ( $^{\circ}\text{C}$ ): 87.6-91.3.

$^1\text{H}$  NMR (400 MHz,  $\text{DMSO}-d_6$ )  $\delta$  10.17 (s, 1H), 7.46 (dd,  $J$  = 8.0, 1.6 Hz, 1H), 7.21 (m, 1H), 7.16 – 7.08 (m, 2H), 7.05 – 6.95 (m, 2H), 6.74 (dd,  $J$  =

8.0, 0.8 Hz, 1H), 6.59 – 6.48 (m, 1H), 5.98 (s, 2H), 2.38 (s, 3H).

$^{13}\text{C}$  NMR (101 MHz,  $\text{DMSO}-d_6$ )  $\delta$  146.84, 135.43, 134.41, 133.19, 130.03, 127.68, 120.75, 118.93, 117.37, 115.42, 15.69.

HRMS (ESI)  $m/z$  calcd for  $\text{C}_{13}\text{H}_{15}\text{N}_2\text{O}_2\text{S}_2^+$  ( $\text{M}+\text{H}$ ) $^+$  295.0570, found 295.0571.

IR ( $\text{cm}^{-1}$ ): 3484, 3387, 3290, 1615, 1479, 1134, 838, 747.

**(3h) 2-amino-N-(4-(trifluoromethoxy)phenyl)benzenesulfonamide (CAS: 2122297-24-7)**

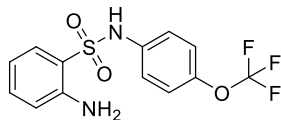

2-amino-*N*-(4-(trifluoromethoxy)phenyl)benzenesulfonamide  
Chemical Formula:  $\text{C}_{13}\text{H}_{11}\text{F}_3\text{N}_2\text{O}_3\text{S}$

Exact Mass: 332.0442

Molecular Weight: 332.2972

The general procedure A was followed using (4-(trifluoromethoxy)phenyl)boronic acid (125.6 mg, 0.6 mmol) as starting material. **3h** was obtained as grey solid (78.2 mg, 59%) after purification by silica gel flash chromatography (PE:EA:MeOH = 3:1:0.2).

Melting point ( $^{\circ}\text{C}$ ): 95.5-98.0.

$^1\text{H}$  NMR (400 MHz,  $\text{DMSO}-d_6$ )  $\delta$  10.47 (s, 1H), 7.51 (dd,  $J$  = 8.4, 1.6 Hz, 1H), 7.24 (d,  $J$  = 8.4 Hz, 3H), 7.17 – 7.06 (m, 2H), 6.76 (dd,  $J$  = 8.4, 0.8 Hz, 1H), 6.60 – 6.52 (m, 1H), 6.01 (s, 2H).

$^{13}\text{C}$  NMR (101 MHz,  $\text{DMSO}-d_6$ )  $\delta$  146.90, 144.47, 137.47, 134.60, 129.98, 122.51, 120.72, 120.50 (q,  $J$  = 254 Hz), 118.66, 117.47, 115.49.

$^{19}\text{F}$  NMR (376 MHz,  $\text{DMSO}-d_6$ )  $\delta$  -57.12.

HRMS (ESI)  $m/z$  calcd for  $\text{C}_{13}\text{H}_{12}\text{F}_3\text{N}_2\text{O}_3\text{S}^+$  ( $\text{M}+\text{H}$ ) $^+$  333.0515, found 333.0519.

IR ( $\text{cm}^{-1}$ ): 3467, 3379, 3232, 2360, 1621, 1506, 1453, 819, 735, 696.

**(3i) 2-amino-N-(4-phenoxyphenyl)benzenesulfonamide (CAS: 1092226-55-5)**

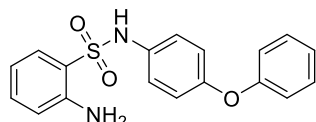

2-amino-*N*-(4-phenoxyphenyl)benzenesulfonamide

Chemical Formula:  $\text{C}_{18}\text{H}_{16}\text{N}_2\text{O}_3\text{S}$

Exact Mass: 340.0882

Molecular Weight: 340.3970

The general procedure A was followed using (4-phenoxyphenyl)boronic acid (128.4 mg, 0.6 mmol) as starting material. **3i** was obtained as grey solid (97.1 mg, 71%) after

purification by silica gel flash chromatography (PE:EA:MeOH = 3:1:0.2).

Melting point (°C): 83.3-86.0.

<sup>1</sup>H NMR (400 MHz, DMSO-*d*<sub>6</sub>) δ 10.11 (s, 1H), 7.44 (dd, *J* = 8.0, 1.2 Hz, 1H), 7.38 – 7.29 (m, 2H), 7.22 (m, 1H), 7.13 – 7.00 (m, 3H), 6.89 (m, 4H), 6.75 (dd, *J* = 8.0, 0.8 Hz, 1H), 6.60 – 6.49 (m, 1H), 5.98 (s, 2H).

<sup>13</sup>C NMR (101 MHz, DMSO-*d*<sub>6</sub>) δ 157.47, 153.18, 146.87, 134.37, 133.74, 130.44, 130.01, 123.62, 122.36, 120.10, 119.01, 118.50, 117.35, 115.41.

HRMS (ESI) *m/z* calcd for C<sub>18</sub>H<sub>17</sub>N<sub>2</sub>O<sub>3</sub>S<sup>+</sup> (M+H)<sup>+</sup> 341.0954, found 341.0958.

IR (cm<sup>-1</sup>): 3496, 3396, 3257, 1615, 1481, 1473, 1137, 892, 752, 728.

**(3j) 2-amino-N-(4-chlorophenyl)benzenesulfonamide (CAS: 63132-70-7)**

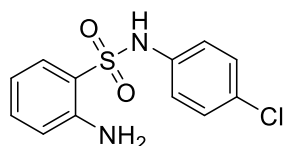

2-amino-*N*-(4-

chlorophenyl)benzenesulfonamide

Chemical Formula: C<sub>12</sub>H<sub>11</sub>ClN<sub>2</sub>O<sub>2</sub>S

Exact Mass: 282.0230

Molecular Weight: 282.7420

The general procedure A was followed using (4-chlorophenyl)boronic acid (93.6 mg, 0.6 mmol) as starting material. **3j** was obtained as grey solid (88.5 mg, 78%) after purification by silica gel flash chromatography (PE:EA:MeOH = 3:1:0.2).

Melting point (°C): 104.6-107.5.

<sup>1</sup>H NMR (400 MHz, CDCl<sub>3</sub>) δ 7.49 (dd, *J* = 8.0, 1.2 Hz, 1H), 7.29 – 7.24 (m, 1H), 7.21 – 7.10 (m, 3H), 7.05 – 6.92 (m, 2H), 6.80 – 6.62 (m, 2H), 4.90 (s,

2H).

<sup>13</sup>C NMR (101 MHz, CDCl<sub>3</sub>) δ 145.00, 134.92, 134.71, 131.42, 129.93, 129.29, 124.02, 120.52, 118.06, 117.84.

HRMS (ESI) *m/z* calcd for C<sub>12</sub>H<sub>12</sub>ClN<sub>2</sub>O<sub>2</sub>S<sup>+</sup> (M+H)<sup>+</sup> 283.0302, found 283.0308.

IR (cm<sup>-1</sup>): 3462, 3377, 3238, 1618, 1478, 1133, 910.6, 758.

**(3k) 2-amino-N-(4-fluorophenyl)benzenesulfonamide (CAS: 159048-93-8)**

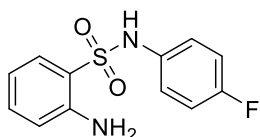

2-amino-*N*-(4-fluorophenyl)benzenesulfonamide

Chemical Formula: C<sub>12</sub>H<sub>11</sub>FN<sub>2</sub>O<sub>2</sub>S

Exact Mass: 266.0525

Molecular Weight: 266.2904

The general procedure A was followed using (4-fluorophenyl)boronic acid (84.0 mg, 0.6 mmol) as starting material. **3k** was obtained as gray-green solid (85.9 mg, 81%) after purification by silica gel flash chromatography (PE:EA:MeOH = 3:1:0.2).

**3k** (*Molecules* **2013**, *18*, 894-913)

Melting point (°C): 83.3-85.5.

<sup>1</sup>H NMR (400 MHz, DMSO-*d*<sub>6</sub>) δ 10.13 (s, 1H), 7.43 (dd, *J* = 8.4, 1.6 Hz, 1H), 7.21 (m, 1H), 7.07 (d, *J* = 1.6 Hz, 2H), 7.05 (s, 2H), 6.75 (dd, *J* = 8.4, 0.8 Hz, 1H), 6.53 (m, 1H), 5.98 (s, 2H).

<sup>13</sup>C NMR (101 MHz, DMSO-*d*<sub>6</sub>) δ 159.26 (d, *J* = 239 Hz), 146.87, 134.44, 134.38 (d, *J* = 2 Hz), 129.98, 122.41 (d, *J* = 8 Hz), 118.71, 117.36, 116.26 (d, *J* = 23 Hz), 115.43.

<sup>19</sup>F NMR (376 MHz, DMSO-*d*<sub>6</sub>) δ -118.99.

**(3l) 2-amino-N-(4-(trifluoromethyl)phenyl)benzenesulfonamide (CAS: 1040000-17-6)**

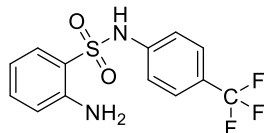

2-amino-N-(4-(trifluoromethyl)phenyl)benzenesulfonamide  
Chemical Formula:  $C_{13}H_{11}F_3N_2O_2S$   
Exact Mass: 316.0493  
Molecular Weight: 316.2982

The general procedure A was followed using 4-(trifluoromethyl)phenylboronic acid (114.0 mg, 0.6 mmol) as starting material. **3l** was obtained as brown solid (82.8 mg, 65%) after purification by silica gel flash chromatography (PE:EA:MeOH = 3:1:0.2).

Melting point (°C): 70.2-74.4

$^1H$  NMR (400 MHz,  $CDCl_3$ )  $\delta$  7.57 (dd,  $J$  = 8.0, 1.2 Hz, 1H), 7.46 (d,  $J$  = 8.4 Hz, 2H), 7.34 – 7.27 (m, 1H), 7.16 (d,  $J$  = 8.4 Hz, 2H), 7.10 (s, 1H),

6.73 (m, 2H), 4.88 (s, 2H).

$^{13}C$  NMR (101 MHz,  $CDCl_3$ )  $\delta$  145.03, 139.77, 134.92, 129.87, 127.15 (q,  $J$  = 32 Hz), 126.49 (q,  $J$  = 4 Hz), 123.88 (q,  $J$  = 270 Hz), 120.88, 120.63, 118.26, 118.02.

$^{19}F$  NMR (376 MHz,  $DMSO-d_6$ )  $\delta$  -61.28.

HRMS (ESI)  $m/z$  calcd for  $C_{13}H_{12}F_3N_2O_2S^+$  ( $M+H$ ) $^+$  317.0566, found 317.0569.

IR ( $cm^{-1}$ ): 3486, 3389, 3291, 1616, 1453, 1479, 903, 652.

**(3m) 2-amino-N-(m-tolyl)benzenesulfonamide (CAS: 953891-86-6)**

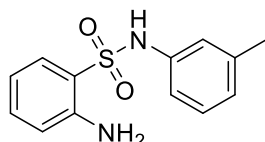

2-amino-N-(m-tolyl)benzenesulfonamide  
Chemical Formula:  $C_{13}H_{14}N_2O_2S$   
Exact Mass: 262.0776  
Molecular Weight: 262.3270

The general procedure A was followed using m-tolylboronic acid (81.6 mg, 0.6 mmol) as starting material. **3m** was obtained as grey solid (74.5 mg, 71%) after purification by silica gel flash chromatography (PE:EA:MeOH = 3:1:0.2).

Melting point (°C): 73.3-75.6

$^1H$  NMR (400 MHz,  $DMSO-d_6$ )  $\delta$  10.14 (s, 1H), 7.49 (dd,  $J$  = 8.0, 1.6 Hz, 1H), 7.20 (m, 1H), 7.11 – 7.02 (m, 1H), 6.86 (s, 1H), 6.84 (d,  $J$  = 1.6 Hz,

1H), 6.78 (d,  $J$  = 7.6 Hz, 1H), 6.74 (dd,  $J$  = 8.0, 0.8 Hz, 1H), 6.58 – 6.49 (m, 1H), 5.98 (s, 2H), 2.18 (s, 3H).

$^{13}C$  NMR (101 MHz,  $DMSO-d_6$ )  $\delta$  146.84, 138.80, 138.17, 134.34, 130.06, 129.34, 124.65, 120.01, 119.09, 117.35, 116.47, 115.35, 21.52.

HRMS (ESI)  $m/z$  calcd for  $C_{13}H_{15}N_2O_2S^+$  ( $M+H$ ) $^+$  263.0849, found 263.0851.

IR ( $cm^{-1}$ ): 3438, 3359, 3257, 1623, 1478, 1453, 757, 697.

**(3n) 2-amino-N-(3-methoxyphenyl)benzenesulfonamide (CAS: 178479-24-8)**

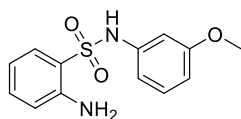

2-amino-N-(3-methoxyphenyl)benzenesulfonamide  
Chemical Formula:  $C_{13}H_{14}N_2O_3S$   
Exact Mass: 278.0725  
Molecular Weight: 278.3260

The general procedure A was followed using (3-methoxyphenyl)boronic acid (91.2 mg, 0.6 mmol) as starting material. **3n** was obtained as brown solid (76.9 mg, 69%) after purification by silica gel flash chromatography (PE:EA:MeOH = 3:1:0.2).

Melting point (°C): 81.4-85.7.



$^1\text{H}$  NMR (400 MHz, DMSO- $d_6$ )  $\delta$  10.24 (s, 1H), 7.52 (dd,  $J$  = 8.4, 1.6 Hz, 1H), 7.28 – 7.17 (m, 1H), 7.10 (t,  $J$  = 8.0 Hz, 1H), 6.75 (d,  $J$  = 7.6 Hz, 1H), 6.58 (m, 4H), 6.00 (s, 2H), 3.65 (s, 3H)

$^{13}\text{C}$  NMR (101 MHz, DMSO- $d_6$ )  $\delta$  160.13, 146.90, 139.45, 134.44, 130.40, 130.10, 118.94, 117.41, 115.43, 111.52, 109.00, 105.11, 55.41.

HRMS (ESI)  $m/z$  calcd for  $\text{C}_{13}\text{H}_{15}\text{N}_2\text{O}_3\text{S}^+$  ( $\text{M}+\text{H}$ ) $^+$  279.0798, found 279.0799.

IR ( $\text{cm}^{-1}$ ): 3453, 3367, 3281, 1628, 1485, 1049, 880, 699.

**(3o) 2-amino-N-(3-fluorophenyl)benzenesulfonamide (CAS: 178479-19-1)**

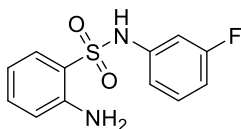

2-amino-N-(3-fluorophenyl)benzenesulfonamide

Chemical Formula:  $\text{C}_{12}\text{H}_{11}\text{FN}_2\text{O}_2\text{S}$

Exact Mass: 266.0525

Molecular Weight: 266.2904

The general procedure A was followed using (3-fluorophenyl)boronic acid (84.0 mg, 0.6 mmol) as starting material. **3o** was obtained as white solid (89.3 mg, 84%) after purification by silica gel flash chromatography (PE:EA:MeOH = 3:1:0.2).

Melting point ( $^{\circ}\text{C}$ ): 80.1-83.2.

$^1\text{H}$  NMR (400 MHz, DMSO- $d_6$ )  $\delta$  10.53 (s, 1H), 7.53 (dd,  $J$  = 8.0, 1.2 Hz, 1H), 7.33 – 7.11 (m, 2H), 6.94 – 6.69 (m, 4H), 6.64 – 6.50 (m, 1H), 6.02 (s, 2H).

$^{13}\text{C}$  NMR (101 MHz, DMSO- $d_6$ )  $\delta$  162.71 (d,  $J$  = 241 Hz), 146.94, 140.12 (d,  $J$  = 10 Hz), 134.67, 131.34 (d,  $J$  = 9 Hz), 130.03, 118.51, 117.50, 115.53, 114.96 (d,  $J$  = 3 Hz), 110.32 (d,  $J$  = 21 Hz), 105.76 (d,  $J$  = 25 Hz).

$^{19}\text{F}$  NMR (376 MHz, DMSO- $d_6$ )  $\delta$  -111.72.

HRMS (ESI)  $m/z$  calcd for  $\text{C}_{12}\text{H}_{12}\text{FN}_2\text{O}_2\text{S}^+$  ( $\text{M}+\text{H}$ ) $^+$  267.0598, found 267.0600.

IR ( $\text{cm}^{-1}$ ): 3494, 3393, 3219, 1610, 1478, 1129, 838, 753.

**(3p) 2-amino-N-(3,5-dimethylphenyl)benzenesulfonamide (CAS: 953717-72-1)**

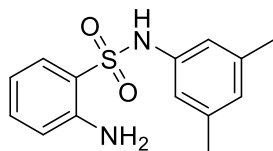

2-amino-N-(3,5-dimethylphenyl)benzenesulfonamide

Chemical Formula:  $\text{C}_{14}\text{H}_{16}\text{N}_2\text{O}_2\text{S}$

Exact Mass: 276.0932

Molecular Weight: 276.3540

The general procedure A was followed using (3,5-dimethylphenyl)boronic acid (90.0 mg, 0.6 mmol) as starting material. **3p** was obtained as grey solid (72.5 mg, 66%) after purification by silica gel flash chromatography (PE:EA:MeOH = 3:1:0.2).

Melting point ( $^{\circ}\text{C}$ ): 137.0-139.8.

$^1\text{H}$  NMR (400 MHz,  $\text{CDCl}_3$ )  $\delta$  7.52 (dd,  $J$  = 8.0, 1.6 Hz, 1H), 7.29 – 7.24 (m, 1H), 6.79 – 6.59 (m, 6H), 4.87 (s, 2H), 2.19 (s, 6H).

$^{13}\text{C}$  NMR (101 MHz,  $\text{CDCl}_3$ )  $\delta$  145.02, 138.85, 136.11, 134.35, 130.02, 127.42, 121.11, 120.14, 117.83, 117.69, 21.18.

HRMS (ESI)  $m/z$  calcd for  $\text{C}_{14}\text{H}_{17}\text{N}_2\text{O}_2\text{S}^+$  ( $\text{M}+\text{H}$ ) $^+$  277.1005, found 277.1010.

IR ( $\text{cm}^{-1}$ ): 3444, 3412, 3255, 1621, 1597, 1480, 1138, 909, 880.

**(3q) 2-amino-N-(2-fluorophenyl)benzenesulfonamide (CAS: 178479-22-6)**

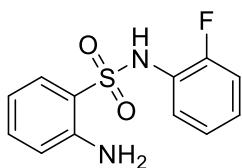

2-amino-N-(2-fluorophenyl)benzenesulfonamide  
Chemical Formula:  $C_{12}H_{11}FN_2O_2S$   
Exact Mass: 266.0525  
Molecular Weight: 266.2904

The general procedure A was followed using (2-fluorophenyl)boronic acid (84.0 mg, 0.6 mmol) as starting material. **3q** was obtained as white solid (49.9 mg, 47%) after purification by silica gel flash chromatography (PE:EA:MeOH = 3:1:0.2).

Melting point (°C): 135.3-139.1.

$^1H$  NMR (400 MHz, DMSO- $d_6$ )  $\delta$  10.03 (s, 1H), 7.41 (dd,  $J$  = 8.0, 1.2 Hz, 1H), 7.29 – 7.19 (m, 2H), 7.19 – 7.01 (m, 3H), 6.77 (dd,  $J$  = 8.4, 0.8 Hz, 1H), 6.52 (m, 1H), 6.04 (s, 2H).

$^{13}C$  NMR (101 MHz, DMSO- $d_6$ )  $\delta$  155.12 (d,  $J$  = 245 Hz), 146.92, 134.50, 129.76, 126.64 (d,  $J$  = 7 Hz), 125.24 (d,  $J$  = 13 Hz), 125.02 (d,  $J$  = 4 Hz), 124.67, 119.20, 117.35, 116.33 (d,  $J$  = 20 Hz), 115.20.

$^{19}F$  NMR (376 MHz, DMSO- $d_6$ )  $\delta$  -124.60.

HRMS (ESI)  $m/z$  calcd for  $C_{12}H_{11}FN_2O_2S^+$  ( $M+H$ ) $^+$  267.0598, found 267.0594.

IR ( $cm^{-1}$ ): 3461, 3297, 2358, 1616, 1456, 1252, 918, 760, 747.

**(3r) 2-amino-N-(2-chlorophenyl)benzenesulfonamide (CAS: 65493-02-9 )**

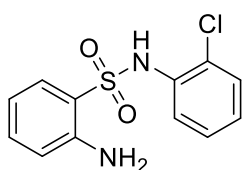

2-amino-N-(2-chlorophenyl)benzenesulfonamide  
Chemical Formula:  $C_{12}H_{11}ClN_2O_2S$   
Exact Mass: 282.0230  
Molecular Weight: 282.7420

The general procedure A was followed using (2-chlorophenyl)boronic acid (93.8 mg, 0.6 mmol) as starting material. **3r** was obtained as white solid (55.8 mg, 49%) after purification by silica gel flash chromatography (PE:EA:MeOH = 3:1:0.2).

Melting point (°C): 83.2-85.4.

$^1H$  NMR (400 MHz, DMSO- $d_6$ )  $\delta$  9.70 (s, 1H), 7.38 (m, 2H), 7.30 – 7.17 (m, 3H), 7.13 (m, 1H), 6.82 – 6.73 (d,  $J$  = 8.0, 1H), 6.52 (m, 1H), 6.07 (s, 2H)

$^{13}C$  NMR (101 MHz, DMSO- $d_6$ )  $\delta$  147.01, 134.52, 134.34, 130.30, 129.60, 128.10, 128.08, 127.19, 125.81, 119.78, 117.43, 115.24.

HRMS (ESI)  $m/z$  calcd for  $C_{12}H_{11}ClN_2O_2S^+$  ( $M+H$ ) $^+$  283.0302, found 283.0307.

IR ( $cm^{-1}$ ): 3496, 3396, 3257, 1615, 1481, 1473, 1137, 892, 752, 728.

**(3s) 2-amino-N-(naphthalen-1-yl)benzenesulfonamide (CAS: 101954-56-7)**

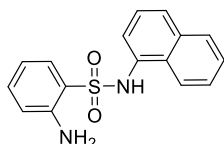

2-amino-N-(naphthalen-1-yl)benzenesulfonamide  
Chemical Formula:  $C_{16}H_{14}N_2O_2S$   
Exact Mass: 298.0776  
Molecular Weight: 298.3600

The general procedure A was followed using naphthalen-1-ylboronic acid (103.2 mg, 0.6 mmol) as starting material. **3s** was obtained as brown solid (73.4 mg, 62%) after purification by silica gel flash chromatography (PE:EA:MeOH = 3:1:0.2).

Melting point (°C): 125.0-128.8.

$^1H$  NMR (400 MHz, DMSO- $d_6$ )  $\delta$  10.11 (s, 1H), 8.20 (dd,  $J$  = 8.0, 1.2 Hz, 1H), 7.93 – 7.79 (m, 1H), 7.73 (d,  $J$  = 8.4 Hz, 1H), 7.53 – 7.32 (m, 3H), 7.28 (m, 2H), 7.16 (1H), 6.74 (dd,  $J$  = 8.0, 0.8 Hz, 1H), 6.43 (m, 1H), 6.06 (s, 2H).

$^{13}\text{C}$  NMR (101 MHz,  $\text{DMSO}-d_6$ )  $\delta$  146.82, 134.28, 134.26, 132.93, 129.68, 129.45, 128.38, 126.69, 126.64, 126.40, 125.96, 123.43, 122.62, 119.82, 117.24, 115.36.

HRMS (ESI)  $m/z$  calcd for  $\text{C}_{16}\text{H}_{15}\text{N}_2\text{O}_2\text{S}^+$  ( $\text{M}+\text{H}$ ) $^+$  299.0849, found 299.0852.

IR ( $\text{cm}^{-1}$ ): 3497, 3396, 3256, 1617, 1456, 1134, 895, 752, 694.

**(3t) 2-amino-N-(naphthalen-2-yl)benzenesulfonamide (CAS: 861604-61-7)**

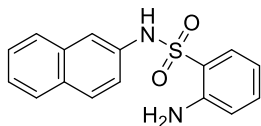

2-amino-N-(naphthalen-2-yl)benzenesulfonamide

Chemical Formula:  $\text{C}_{16}\text{H}_{14}\text{N}_2\text{O}_2\text{S}$

Exact Mass: 298.0776

Molecular Weight: 298.3600

The general procedure A was followed using naphthalen-2-ylboronic acid (103.2 mg, 0.6 mmol) as starting material. **3t** was obtained as brown solid (56.2 mg, 47%) after purification by silica gel flash chromatography (PE:EA:MeOH = 3:1:0.2).

Melting point ( $^{\circ}\text{C}$ ): 105.2-109.8.

$^1\text{H}$  NMR (400 MHz,  $\text{DMSO}-d_6$ )  $\delta$  10.46 (s, 1H), 7.77 (d,  $J$  = 8.0 Hz, 2H), 7.73 (d,  $J$  = 8.0 Hz, 1H), 7.58 (d,  $J$  = 7.6 Hz, 1H), 7.50 (s, 1H), 7.42 (d,  $J$  = 7.6 Hz, 1H), 7.37 (d,  $J$  = 7.2 Hz, 1H), 7.26 (d,  $J$  = 8.4 Hz, 1H), 7.16 (t,  $J$  = 6.8 Hz, 1H), 6.72 (d,  $J$  = 8.0 Hz, 1H), 6.52 (t,  $J$  = 7.2 Hz, 1H), 6.05 (s, 2H).

$^{13}\text{C}$  NMR (101 MHz,  $\text{DMSO}-d_6$ )  $\delta$  146.92, 135.88, 134.48, 133.72, 130.18, 129.42, 127.97, 127.49, 127.12, 125.28, 120.20, 118.83, 117.38, 115.43, 115.28.

HRMS (ESI)  $m/z$  calcd for  $\text{C}_{16}\text{H}_{15}\text{N}_2\text{O}_2\text{S}^+$  ( $\text{M}+\text{H}$ ) $^+$  299.0849, found 299.0851.

IR ( $\text{cm}^{-1}$ ): 3498, 3400, 3222, 2359, 1617, 1559, 1480, 1455, 1132, 751, 696.

**(3u) N-([1,1'-biphenyl]-4-yl)-2-aminobenzenesulfonamide (CAS: 1955496-07-7)**

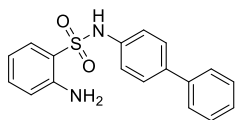

N-([1,1'-biphenyl]-4-yl)-2-aminobenzenesulfonamide

Chemical Formula:  $\text{C}_{18}\text{H}_{16}\text{N}_2\text{O}_2\text{S}$

Exact Mass: 324.0932

Molecular Weight: 324.3980

The general procedure A was followed using [1,1'-biphenyl]-4-ylboronic acid (118.8 mg, 0.6 mmol) as starting material. **3u** was obtained as white solid (62.4 mg, 48%) after purification by silica gel flash chromatography (PE:EA:MeOH = 3:1:0.2).

Melting point ( $^{\circ}\text{C}$ ): 155.5-158.1.

$^1\text{H}$  NMR (400 MHz,  $\text{DMSO}-d_6$ )  $\delta$  10.36 (s, 1H), 7.63 – 7.47 (m, 5H), 7.40 (t,  $J$  = 7.2 Hz, 2H), 7.30 (t,  $J$  = 7.6 Hz, 1H), 7.26 – 7.18 (m, 1H), 7.14 (d,  $J$  = 8.4 Hz, 2H), 6.81 – 6.71 (m, 1H), 6.62 – 6.53 (m, 1H), 6.03 (s, 2H).

$^{13}\text{C}$  NMR (101 MHz,  $\text{DMSO}-d_6$ )  $\delta$  146.89, 139.81, 137.69, 135.60, 134.46, 130.06, 129.33, 127.78, 127.58, 126.70, 119.69, 119.08, 117.44, 115.46.

HRMS (ESI)  $m/z$  calcd for  $\text{C}_{18}\text{H}_{17}\text{N}_2\text{O}_2\text{S}^+$  ( $\text{M}+\text{H}$ ) $^+$  325.1005, found 325.1009.

IR ( $\text{cm}^{-1}$ ): 3482, 3382, 2362, 1617, 1457, 1135, 917, 843, 759.

B. Separation of different products of Cu-catalyzed reaction of  
2-aminobenzenesulfonamide with phenylboronic acid

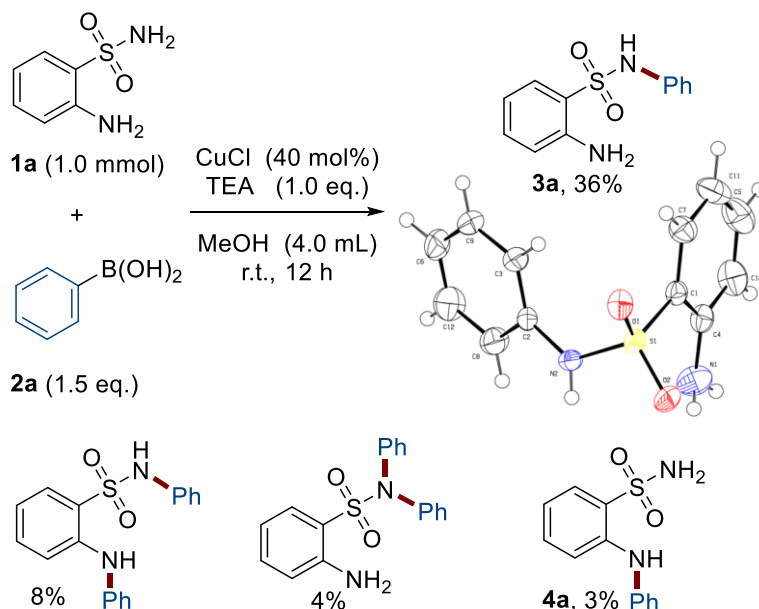

A flame-dried 100 mL column reaction flask was placed with a stirring bar. Then, 2-aminobenzenesulfonamide (172.2 mg, 1 mmol, 1.0 eq.), CuCl (39.5 mg, 0.4 mmol, 40 mol%), Et<sub>3</sub>N (140  $\mu$ L, 1 mmol, 1 eq.), **2a** (182.8 mg, 1.5 mmol, 1.5 eq.) and MeOH (4.0 mL) were added. The resulting mixture was stirred vigorously at ambient temperature for 12 hours. The reaction mixture was filtered, concentrated and then purified by column chromatography on silica gel to give the products. The recovery yield of **1a** was 10%. **4a** was obtained as yellow oil after purification by silica gel flash chromatography (PE:EA = 10:1).

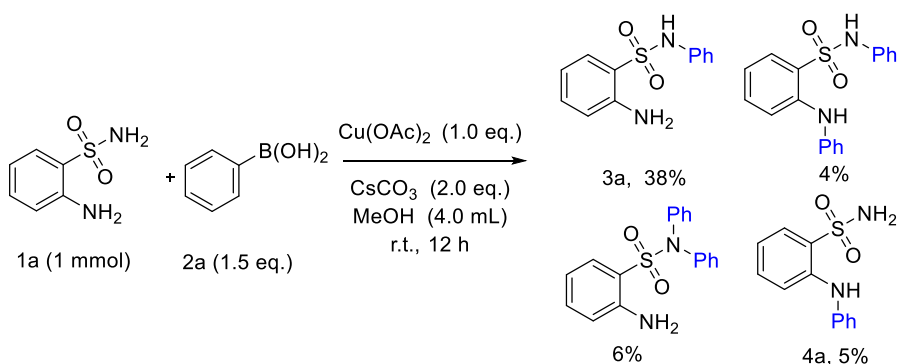

A flame-dried 100 mL column reaction flask was placed with a stirring bar. Then, 2-aminobenzenesulfonamide (172.2 mg, 1 mmol, 1.0 eq.), Cu(OAc)<sub>2</sub> (181.6 mg, 1 mmol, 100 mol%), CsCO<sub>3</sub> (649.6 mg, 2 mmol, 2 eq.), **2a** (182.8 mg, 1.5 mmol, 1.5 eq.) and MeOH (4.0 mL) were added. The resulting mixture was stirred vigorously at ambient temperature for 12 hours. The reaction mixture was filtered, concentrated and then purified by column chromatography on silica gel to give the products. The recovery yield of **1a** was 22%.

**(4a) 2-(phenylamino)benzenesulfonamide (CAS: 23773-76-4)**

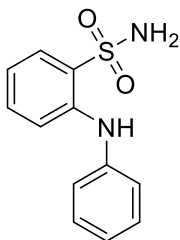

$^1\text{H}$  NMR (400 MHz, DMSO- $d_6$ )  $\delta$  7.76 (dd,  $J$  = 8.0, 1.6 Hz, 1H), 7.66 (s, 1H), 7.54 (s, 2H), 7.41 – 7.27 (m, 4H), 7.19 (d,  $J$  = 7.6 Hz, 2H), 7.05 (t,  $J$  = 7.2 Hz, 1H), 6.95 – 6.89 (m, 1H).

$^{13}\text{C}$  NMR (101 MHz, DMSO- $d_6$ )  $\delta$  141.71, 141.45, 133.57, 129.87, 129.04, 128.98, 123.12, 121.13, 119.07, 116.12.

2-(phenylamino)benzenesulfonamide

Chemical Formula:  $\text{C}_{12}\text{H}_{12}\text{N}_2\text{O}_2\text{S}$

Exact Mass: 248.0619

Molecular Weight: 248.3000

**N-phenyl-2-(phenylamino)benzenesulfonamide**

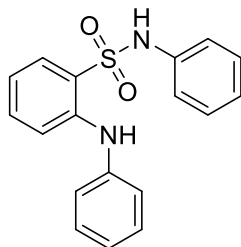

N-phenyl-2-

(phenylamino)benzenesulfonamide

Chemical Formula:  $\text{C}_{18}\text{H}_{16}\text{N}_2\text{O}_2\text{S}$

Exact Mass: 324.0932

Molecular Weight: 324.3980

**N-phenyl-2-(phenylamino)benzenesulfonamide** was obtained as brown solid, after purification by silica gel flash chromatography (PE:EA = 10:1).

$^1\text{H}$  NMR (400 MHz, DMSO- $d_6$ )  $\delta$  10.46 (s, 1H), 7.70 (dd,  $J$  = 8.0, 1.5 Hz, 1H), 7.53 (s, 1H), 7.35 (m, 3H), 7.24 – 7.17 (m, 2H), 7.17 – 7.03 (m, 6H), 6.99 (t,  $J$  = 7.2 Hz, 1H), 6.85 – 6.79 (m, 1H).

$^{13}\text{C}$  NMR (101 MHz, DMSO- $d_6$ )  $\delta$  142.71, 141.01, 137.74, 134.68, 130.92, 129.87, 129.64, 124.60, 123.76, 123.29, 122.05, 120.42, 118.84, 116.16.

**2-Amino-*N,N*-diphenylbenzenesulfonamide**

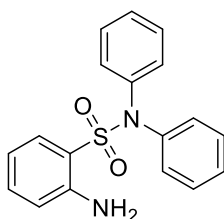

2-amino-*N,N*-diphenylbenzenesulfonamide

Chemical Formula:  $\text{C}_{18}\text{H}_{16}\text{N}_2\text{O}_2\text{S}$

Exact Mass: 324.0932

Molecular Weight: 324.3980

**2-Amino-*N,N*-diphenylbenzenesulfonamide** was obtained as brown solid, after purification by silica gel flash chromatography (PE:EA = 10:1).

$^1\text{H}$  NMR (400 MHz, DMSO- $d_6$ )  $\delta$  7.39 – 7.23 (m, 12H), 6.85 (dd,  $J$  = 8.4, 0. Hz, 1H), 6.53 (m, 1H), 5.94 (s, 2H).

$^{13}\text{C}$  NMR (101 MHz, DMSO- $d_6$ )  $\delta$  147.44, 141.62, 135.06, 130.52, 129.83, 129.00, 128.13, 118.75, 117.68, 115.73.

### C. Reactions between 3- or 4-aminobenzene sulfonamide with arylboronic acids

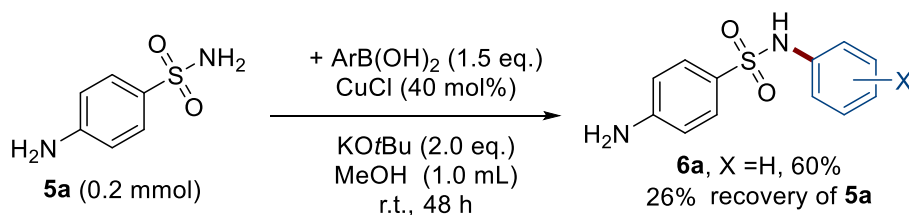

General procedure B: A flame-dried 100 mL column reaction flask was placed with a stirring bar. Then, 4-aminobenzenesulfonamide **5a** (34.5 mg, 0.2 mmol, 1.0 eq.),  $\text{CuCl}$  (7.9 mg, 0.08 mmol, 40 mol%),  $\text{KOtBu}$  (44.9 mg, 0.4 mmol, 2.0 eq.), arylboronic acid (0.3 mmol, 1.5 eq.), and  $\text{MeOH}$  (1.0 mL) were added. The resulting mixture was stirred vigorously at ambient temperature for 48 hours. The reaction mixture was filtered, concentrated and then purified by column chromatography on silica gel to give the target product.

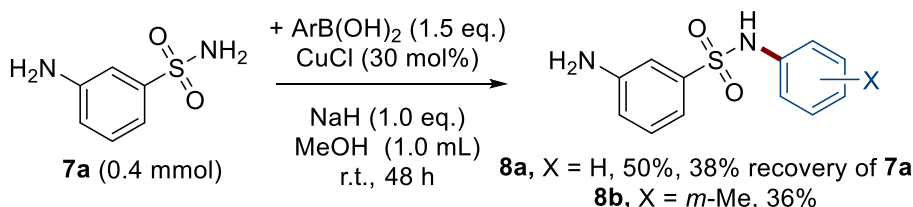

General procedure C: A flame-dried 100 mL column reaction flask was placed with a stirring bar. Then, 3-aminobenzenesulfonamide **7a** (68.9 mg, 0.4 mmol, 1.0 eq.),  $\text{CuCl}$  (11.9 mg, 0.12 mmol, 30 mol%),  $\text{NaH}$  (16.0 mg, 0.4 mmol, 1 eq.), arylboronic acid (0.6 mmol, 1.5 eq.), and  $\text{MeOH}$  (1.0 mL) were added. The resulting mixture was stirred vigorously at ambient temperature for 48 hours. The reaction mixture was filtered, concentrated and then purified by column chromatography on silica gel to give the target product.

**(6a) 4-amino-N-phenylbenzenesulfonamide (CAS: 127-77-5)**

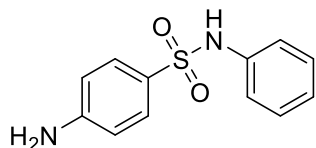

4-amino-*N*-phenylbenzenesulfonamide

Chemical Formula: C<sub>12</sub>H<sub>12</sub>N<sub>2</sub>O<sub>2</sub>S

Exact Mass: 248.0619

Molecular Weight: 248.3000

The general procedure B was followed using phenylboronic acid **2a** (36.6 mg, 0.3 mmol) as starting material. **6a** was obtained as grey solid (29.9 mg, 60%) after purification by silica gel flash chromatography (PE:EA:MeOH = 3:1:0.2).

Melting point (°C): 191.3-196.4.

<sup>1</sup>H NMR (400 MHz, DMSO-*d*<sub>6</sub>) δ 9.84 (s, 1H), 7.39 (d, *J* = 8.4 Hz, 2H), 7.19 (m, 2H), 7.10 – 7.02 (m, 2H), 6.96 (t, *J* = 7.6 Hz, 1H), 6.53 (d, *J* = 8.8

Hz, 2H), 5.95 (s, 2H).

<sup>13</sup>C NMR (101 MHz, DMSO-*d*<sub>6</sub>) δ 153.28, 138.96, 129.41, 129.17, 124.90, 123.75, 119.88, 113.02.

HRMS (ESI) *m/z* calcd for C<sub>12</sub>H<sub>13</sub>N<sub>2</sub>O<sub>2</sub>S<sup>+</sup> (M+H)<sup>+</sup> 249.06922, found 249.06958.

IR (cm<sup>-1</sup>): 3421, 3475, 3297, 1636, 1592, 1145, 1089, 688, 679.

**(6b) 4-amino-N-(*p*-tolyl)benzenesulfonamide (CAS: 16803-95-5)**

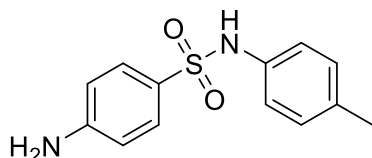

4-amino-*N*-(*p*-tolyl)benzenesulfonamide

Chemical Formula: C<sub>13</sub>H<sub>14</sub>N<sub>2</sub>O<sub>2</sub>S

Exact Mass: 262.0776

Molecular Weight: 262.3270

The general procedure B was followed using *p*-tolylboronic acid (40.8 mg, 0.3 mmol) as starting material. **6b** was obtained as brown solid (33.2 mg, 63%) after purification by silica gel flash chromatography (PE:EA:MeOH = 3:1:0.2).

Melting point (°C): 187.9-189.9.

<sup>1</sup>H NMR (400 MHz, DMSO-*d*<sub>6</sub>) δ 9.65 (s, 1H), 7.34 (d, *J* = 8.4 Hz, 2H), 7.01 – 6.91 (m, 4H), 6.50 (d, *J* = 8.8 Hz, 2H), 5.92 (s, 2H), 2.17

(s, 3H).

<sup>13</sup>C NMR (101 MHz, DMSO-*d*<sub>6</sub>) δ 153.18, 136.31, 132.97, 129.83, 129.14, 124.95, 120.48, 112.98, 20.75.

HRMS (ESI) *m/z* calcd for C<sub>13</sub>H<sub>15</sub>N<sub>2</sub>O<sub>2</sub>S<sup>+</sup> (M+H)<sup>+</sup> 263.0849, found 263.0851.

IR (cm<sup>-1</sup>): 3413, 3337, 3020, 2341, 1635, 1494, 1142, 807, 674.

**(6c) 4-amino-N-(4-chlorophenyl)benzenesulfonamide (CAS: 16803-92-2)**

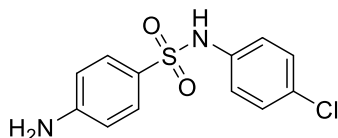

4-amino-*N*-(4-chlorophenyl)benzenesulfonamide

Chemical Formula: C<sub>12</sub>H<sub>11</sub>ClN<sub>2</sub>O<sub>2</sub>S

Exact Mass: 282.0230

Molecular Weight: 282.7420

The general procedure B was followed using (4-chlorophenyl)boronic acid (46.8 mg, 0.3 mmol) as starting material. **6c** was obtained as grey solid (25.3 mg, 45%) after purification by silica gel flash chromatography (PE:EA:MeOH = 3:1:0.2).

Melting point (°C): 189.4-199.0.

<sup>1</sup>H NMR (400 MHz, DMSO-*d*<sub>6</sub>) δ 10.00 (s, 1H), 7.41 – 7.35 (m, 2H), 7.29 – 7.23 (m, 2H), 7.09 – 7.03 (m, 2H), 6.53 (m, 2H), 5.99 (s, 2H).

<sup>13</sup>C NMR (101 MHz, DMSO-*d*<sub>6</sub>) δ 153.46, 137.97, 129.39, 129.20, 127.79, 124.40, 121.41, 113.07.

HRMS (ESI) *m/z* calcd for C<sub>12</sub>H<sub>12</sub>ClN<sub>2</sub>O<sub>2</sub>S<sup>+</sup> (M+H)<sup>+</sup> 283.0302, found 283.0306.

IR (cm<sup>-1</sup>): 3412, 3341, 3096, 2342, 1634, 1457, 1145, 815, 780.

**(6d) 4-amino-N-(4-(tert-butyl)phenyl)benzenesulfonamide (CAS: 501356-80-5)**

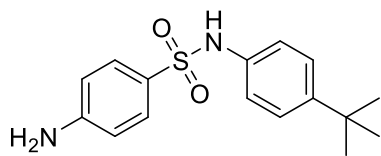

4-amino-N-(4-(tert-butyl)phenyl)benzenesulfonamide  
Chemical Formula: C<sub>16</sub>H<sub>20</sub>N<sub>2</sub>O<sub>2</sub>S  
Exact Mass: 304.1245  
Molecular Weight: 304.4080

The general procedure B was followed using 4-(tert-butyl)phenylboronic acid (53.4 mg, 0.3 mmol) as starting material. **6d** was obtained as white solid (36.4 mg, 60%) after purification by silica gel flash chromatography (PE:EA:MeOH = 3:1:0.2).

Melting point (°C): 131.6-138.1.

<sup>1</sup>H NMR (400 MHz, DMSO-*d*<sub>6</sub>) δ 9.74 (s, 1H), 7.39 (d, *J* = 8.8 Hz, 2H), 7.21 (d, *J* = 8.8 Hz, 2H), 6.97 (d, *J* = 8.8 Hz, 2H), 6.53 (d, *J* = 8.8 Hz, 2H), 5.94 (s, 2H), 1.19 (s, 9H).

<sup>13</sup>C NMR (101 MHz, DMSO-*d*<sub>6</sub>) δ 153.20, 146.04, 136.26, 129.12, 126.10, 125.27, 119.70, 113.06, 34.36, 31.60.

HRMS (ESI) *m/z* calcd for C<sub>16</sub>H<sub>21</sub>N<sub>2</sub>O<sub>2</sub>S<sup>+</sup> (M+H)<sup>+</sup> 305.13183, found 305.13202

IR (cm<sup>-1</sup>): 3486, 3388.2, 3290, 2343, 1616, 1453, 902, 838.

**(6e) 4-amino-N-(3,5-dimethylphenyl)benzenesulfonamide (CAS: 874212-15-4)**

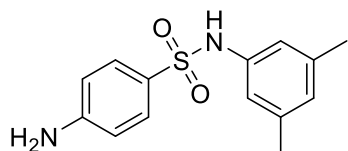

4-amino-N-(3,5-dimethylphenyl)benzenesulfonamide  
Chemical Formula: C<sub>14</sub>H<sub>16</sub>N<sub>2</sub>O<sub>2</sub>S  
Exact Mass: 276.0932  
Molecular Weight: 276.3540

The general procedure B was followed using (3,5-dimethylphenyl)boronic acid (45.0 mg, 0.3 mmol) as starting material. **6e** was obtained as brown solid (37.8 mg, 68%) after purification by silica gel flash chromatography (PE:EA:MeOH = 3:1:0.2).

Melting point (°C): 145.1-149.7.

<sup>1</sup>H NMR (400 MHz, DMSO-*d*<sub>6</sub>) δ 9.70 (s, 1H), 7.38 (d, *J* = 8.4 Hz, 2H), 6.68 (s, 2H), 6.59 (s, 1H), 6.52 (d, *J* = 8.8 Hz, 2H), 5.94 (s, 2H), 2.13 (s, 6H).

<sup>13</sup>C NMR (101 MHz, DMSO-*d*<sub>6</sub>) δ 153.21, 138.86, 138.37, 129.15, 125.28, 125.10, 117.35, 113.01, 21.48.

HRMS (ESI) *m/z* calcd for C<sub>14</sub>H<sub>17</sub>N<sub>2</sub>O<sub>2</sub>S<sup>+</sup> (M+H)<sup>+</sup> 277.1005, found 277.1009.

IR (cm<sup>-1</sup>): 3486, 3388, 3290, 2343, 1615, 1453, 902, 838.

**(6f) 4-amino-N-(*m*-tolyl)benzenesulfonamide (CAS: 16803-94-4)**

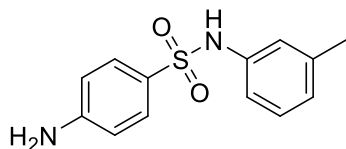

4-amino-N-(*m*-tolyl)benzenesulfonamide  
Chemical Formula: C<sub>13</sub>H<sub>14</sub>N<sub>2</sub>O<sub>2</sub>S  
Exact Mass: 262.0776  
Molecular Weight: 262.3270

The general procedure B was followed using *m*-tolylboronic acid (40.8 mg, 0.3 mmol) as starting material. **6f** was obtained as brown solid (34.8 mg, 65%) after purification by silica gel flash chromatography (PE:EA:MeOH = 3:1:0.2).

Melting point (°C): 126.5-131.4.

<sup>1</sup>H NMR (400 MHz, DMSO-*d*<sub>6</sub>) δ 9.77 (s, 1H), 7.39 (d, *J* = 8.8 Hz, 2H), 7.06 (t, *J* = 8.0 Hz, 1H), 6.87 (d, *J* = 2.0 Hz, 2H), 6.78 (d, *J* = 7.6 Hz,

1H), 6.53 (d, *J* = 8.8 Hz, 2H), 5.94 (s, 2H), 2.18 (s, 3H).

<sup>13</sup>C NMR (101 MHz, DMSO-*d*<sub>6</sub>) δ 153.24, 138.91, 138.63, 129.22, 129.16, 125.00, 124.45, 120.32, 116.83, 113.02,



21.55.

HRMS (ESI)  $m/z$  calcd for  $C_{13}H_{15}N_2O_2S^+$  (M+H) $^+$  263.0849, found 263.0850.

IR (cm $^{-1}$ ): 3414, 3340, 3152, 2361, 1590, 1140, 884, 826.

**(6g) 4-amino-N-(4-fluorophenyl)benzenesulfonamide (CAS: 1494-85-5)**

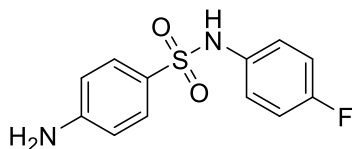

4-amino-*N*-(4-fluorophenyl)benzenesulfonamide  
Chemical Formula:  $C_{12}H_{11}FN_2O_2S$   
Exact Mass: 266.0525  
Molecular Weight: 266.2904

The general procedure B was followed using (4-fluorophenyl)boronic acid (42.0 mg, 0.3 mmol) as starting material. **6g** was obtained as grey solid (31.9 mg, 60%) after purification by silica gel flash chromatography (PE:EA:MeOH = 3:1:0.2).

Melting point (°C): 161.6-165.0.

$^1H$  NMR (400 MHz, DMSO- $d_6$ )  $\delta$  9.77 (s, 1H), 7.33 (d,  $J$  = 8.8 Hz, 2H), 7.05 (d,  $J$  = 6.8 Hz, 4H), 6.52 (d,  $J$  = 8.8 Hz, 2H), 5.96 (s, 2H).

$^{13}C$  NMR (101 MHz, DMSO- $d_6$ )  $\delta$  159.14 (d,  $J$  = 238 Hz), 153.32, 135.18 (d,  $J$  = 3 Hz), 129.16, 124.54, 122.60 (d,  $J$  = 8 Hz), 116.10 (d,  $J$  = 22 Hz), 113.03.

$^{19}F$  NMR (376 MHz, DMSO- $d_6$ )  $\delta$  -119.44.

HRMS (ESI)  $m/z$  calcd for  $C_{12}H_{12}FN_2O_2S^+$  (M+H) $^+$  267.0598, found 267.0597.

IR (cm $^{-1}$ ): 3487, 3394, 2360, 1622, 1446, 1143, 842, 704.

**(8a) 3-amino-N-phenylbenzenesulfonamide (CAS: 80-21-7)**

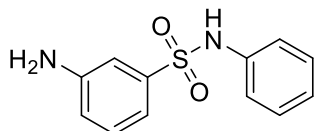

3-amino-*N*-phenylbenzenesulfonamide  
Chemical Formula:  $C_{12}H_{12}N_2O_2S$   
Exact Mass: 248.0619  
Molecular Weight: 248.3000

The general procedure C was followed using phenylboronic acid **2a** (73.2 mg, 0.6 mmol) as starting material. **8a** was obtained as white solid (49.8 mg, 50%) after purification by silica gel flash chromatography (PE:EA:MeOH = 2:1:0.2).

Melting point (°C): 127.2-131.5.

$^1H$  NMR (400 MHz, DMSO- $d_6$ )  $\delta$  10.12 (s, 1H), 7.22 (t,  $J$  = 8.0 Hz, 2H), 7.11 (m, 3H), 7.03 – 6.95 (m, 2H), 6.89 – 6.82 (m, 1H), 6.70 (dd,  $J$  = 8.0,

2.0 Hz, 1H), 5.56 (s, 2H).

$^{13}C$  NMR (101 MHz, DMSO- $d_6$ )  $\delta$  149.79, 140.69, 138.53, 129.99, 129.50, 124.09, 120.06, 117.99, 113.73, 111.60.

HRMS (ESI)  $m/z$  calcd for  $C_{12}H_{13}N_2O_2S^+$  (M+H) $^+$  249.0692, found 249.0693.

IR (cm $^{-1}$ ): 3411, 3324, 3079, 2360, 1480, 1456, 1149, 790, 755.

**(8b) 3-amino-N-(*m*-tolyl)benzenesulfonamide (CAS: 953888-95-4)**

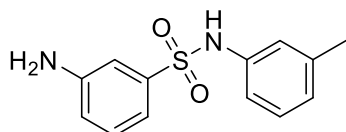

3-amino-*N*-(*m*-tolyl)benzenesulfonamide  
Chemical Formula:  $C_{13}H_{14}N_2O_2S$   
Exact Mass: 262.0776  
Molecular Weight: 262.3270

The general procedure C was followed using *m*-tolylboronic acid (81.6 mg, 0.6 mmol) as starting material. **8b** was obtained as brown solid (37.8 mg, 36%) after purification by silica gel flash chromatography (PE:EA:MeOH = 2:1:0.2).

Melting point (°C): 125.3-130.9.

$^1\text{H}$  NMR (400 MHz,  $\text{DMSO-}d_6$ )  $\delta$  10.05 (s, 1H), 7.17 – 7.05 (m, 2H), 6.96 (t,  $J = 2.0$  Hz, 1H), 6.91 – 6.79 (m, 4H), 6.69 (m, 1H), 5.56 (s, 2H), 2.19 (s, 3H).

$^{13}\text{C}$  NMR (101 MHz,  $\text{DMSO-}d_6$ )  $\delta$  149.77, 140.76, 138.75, 138.47, 129.98, 129.30, 124.81, 120.55, 117.97, 117.04, 113.75, 111.62, 21.55.

HRMS (ESI)  $m/z$  calcd for  $\text{C}_{13}\text{H}_{15}\text{N}_2\text{O}_2\text{S}^+$  ( $\text{M}+\text{H}$ ) $^+$  263.0849, found 263.0850.

IR ( $\text{cm}^{-1}$ ): 3477, 3385, 3232, 2340, 1626, 1473, 1146, 758, 672.

## D. Arylation of phenylamino of 2 or 3- aminobenzenesulfonamide with aryl boronic acid

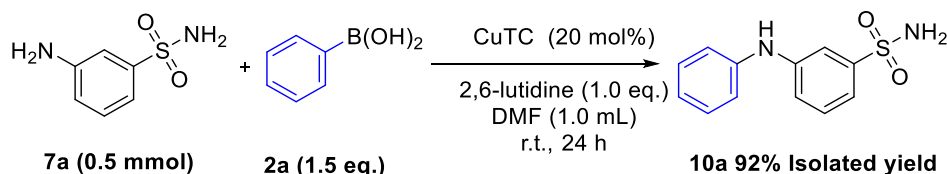

General procedure D: A flame-dried 100 mL pear shaped flask was placed with a stirring bar. Then, 3-aminobenzenesulfonamide (86.1 mg, 0.5 mmol, 1.0 eq.), CuTC (19.1 mg, 0.1 mmol, 20 mol%), 2,6-Lutidine (58.0  $\mu$ L, 0.5 mmol, 1.0 eq.), arylboronic acid (0.75 mmol, 1.5 eq.) and DMF (1.0 mL) were added. The resulting mixture was stirred vigorously at ambient temperature for 24 hours. The reaction mixture was treated with EtOAc (5.0 mL) and water (5.0 mL). The organic layer was separated, and the aqueous layer was extracted with EtOAc ( $3 \times 5.0$  mL). The combined organic phase was washed with brine ( $2 \times 5.0$  mL), dried over anhydrous  $\text{Na}_2\text{SO}_4$ , and concentrated to afford residue, which was purified by column chromatography on silica gel to give the target product.

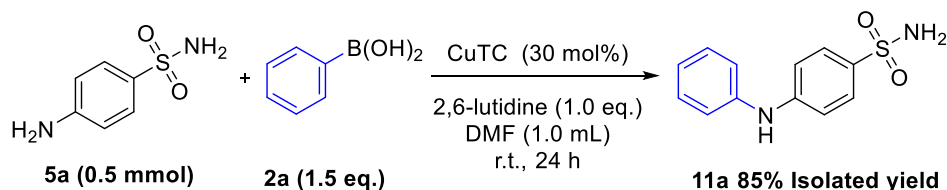

General procedure E: A flame-dried 100 mL pear shaped flask was placed with a stirring bar. Then, 4-aminobenzenesulfonamide (86.1 mg, 0.5 mmol, 1.0 eq.), CuTC (28.6 mg, 0.15 mmol, 30 mol%), 2,6-Lutidine (58.0  $\mu$ L, 0.5 mmol, 1.0 eq.), arylboronic acid (0.75 mmol, 1.5 eq.) and DMF (1.0 mL) were added. The resulting mixture was stirred vigorously at ambient temperature for 24 hours. The reaction mixture was treated with EtOAc (5.0 mL) and water (5.0 mL). The organic layer was separated, and the aqueous layer was extracted with EtOAc ( $3 \times 5.0$  mL). The combined organic phase was washed with brine ( $2 \times 5.0$  mL), dried over anhydrous  $\text{Na}_2\text{SO}_4$ , and concentrated to afford residue, which was purified by column chromatography on silica gel to give the target product.

**(10a) 3-(phenylamino)benzenesulfonamide (CAS: 1294519-72-4)**

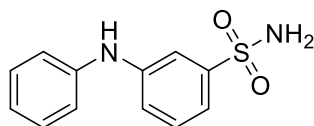

3-(phenylamino)benzenesulfonamide

Chemical Formula: C<sub>12</sub>H<sub>12</sub>N<sub>2</sub>O<sub>2</sub>S

Exact Mass: 248.0619

Molecular Weight: 248.3000

The general procedure D was followed using phenylboronic acid **2a** (91.4 mg, 0.75 mmol) as starting material. **10a** was obtained as white solid (112.6 mg, 92%) after purification by silica gel flash chromatography (PE:EA:Acetone = 4:1:0.3).

Melting point (°C): 114.2-115.9.

<sup>1</sup>H NMR (400 MHz, DMSO-*d*<sub>6</sub>) δ 8.52 (s, 1H), 7.52 (t, *J* = 2.0 Hz, 1H), 7.38 (t, *J* = 8.0 Hz, 1H), 7.29 (m, 4H), 7.25 – 7.17 (m, 2H), 7.16 – 7.10 (m, 2H),

6.92 (t, *J* = 7.2 Hz, 1H).

<sup>13</sup>C NMR (101 MHz, DMSO-*d*<sub>6</sub>) δ 145.48, 144.69, 142.74, 130.27, 129.81, 121.38, 119.30, 118.34, 116.52, 112.72.

HRMS (ESI) *m/z* calcd for C<sub>12</sub>H<sub>12</sub>N<sub>2</sub>O<sub>2</sub>S<sup>+</sup> (M+H)<sup>+</sup> 249.0692, found 249.0694.

IR (cm<sup>-1</sup>): 3337, 3236, 2988, 2344, 1585, 1481, 1149, 864, 680.

**(10b) 3-(*p*-tolylamino)benzenesulfonamide (CAS: 1294519-73-5)**

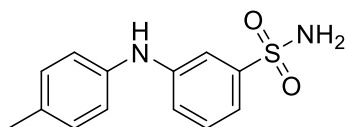

3-(*p*-tolylamino)benzenesulfonamide

Chemical Formula: C<sub>13</sub>H<sub>14</sub>N<sub>2</sub>O<sub>2</sub>S

Exact Mass: 262.0776

Molecular Weight: 262.3270

The general procedure D was followed using *p*-tolylboronic acid (102.0 mg, 0.75 mmol) as starting material. **10b** was obtained as white solid (113.7 mg, 87%) after purification by silica gel flash chromatography (PE:EA:Acetone = 4:1:0.3).

Melting point (°C): 147.5-152.6.

<sup>1</sup>H NMR (400 MHz, DMSO-*d*<sub>6</sub>) δ 8.37 (s, 1H), 7.47 – 7.41 (m, 1H), 7.34 (t, *J* = 8.0 Hz, 1H), 7.25 (s, 2H), 7.20 – 7.07 (m, 4H), 7.03 (d, *J* = 8.4 Hz, 2H),

2.25 (s, 3H).

<sup>13</sup>C NMR (101 MHz, DMSO-*d*<sub>6</sub>) δ 145.45, 145.37, 139.98, 130.65, 130.23, 130.20, 119.27, 118.60, 115.90, 111.96, 20.82.

HRMS (ESI) *m/z* calcd for C<sub>13</sub>H<sub>15</sub>N<sub>2</sub>O<sub>2</sub>S<sup>+</sup> (M+H)<sup>+</sup> 263.0849, found 263.0848.

IR (cm<sup>-1</sup>): 3366, 3326, 3236, 1594, 1487, 1150, 783, 731.

**(10c) 3-([1,1'-biphenyl]-4-ylamino)benzenesulfonamide**

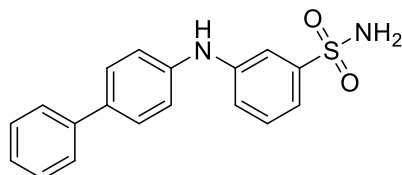

3-([1,1'-biphenyl]-4-ylamino)benzenesulfonamide

Chemical Formula: C<sub>18</sub>H<sub>16</sub>N<sub>2</sub>O<sub>2</sub>S

Exact Mass: 324.0932

Molecular Weight: 324.3980

The general procedure D was followed using [1,1'-biphenyl]-4-ylboronic acid (148.5 mg, 0.75 mmol) as starting material. **10c** was obtained as grey solid (105.3 mg, 65%) after purification by silica gel flash chromatography (PE:EA:Acetone = 4:1:0.3).

Melting point (°C): 184.0-186.6.

<sup>1</sup>H NMR (400 MHz, DMSO-*d*<sub>6</sub>) δ 8.68 (s, 1H), 7.69 – 7.59 (m, 4H), 7.57 (t, *J* = 2.0 Hz, 1H), 7.48 – 7.37 (m, 3H), 7.34 – 7.18 (m, 7H).

<sup>13</sup>C NMR (101 MHz, DMSO-*d*<sub>6</sub>) δ 145.54, 144.36, 142.35, 140.35, 132.91, 130.35, 129.36, 128.00, 127.11, 126.40,

119.67, 118.36, 116.82, 113.15.

HRMS (ESI)  $m/z$  calcd for  $C_{18}H_{17}N_2O_2S^+$  (M+H) $^+$  325.1005, found 325.1008.

IR (cm $^{-1}$ ): 3350, 3270, 1592, 1475, 1291, 1149, 680.

**(10d) 3-((3,5-dimethylphenyl)amino)benzenesulfonamide**

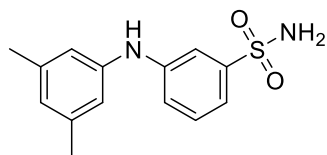

3-((3,5-dimethylphenyl)amino)benzenesulfonamide

Chemical Formula:  $C_{14}H_{16}N_2O_2S$

Exact Mass: 276.0932

Molecular Weight: 276.3540

The general procedure D was followed using (3,5-dimethylphenyl)boronic acid (112.5 mg, 0.75 mmol) as starting material. **10d** was obtained as white solid (126.6 mg, 92%) after purification by silica gel flash chromatography (PE:EA:Acetone = 4:1:0.3).

Melting point (°C): 154.2-159.3.

$^1H$  NMR (400 MHz, DMSO- $d_6$ )  $\delta$  8.35 (s, 1H), 7.47 (t,  $J$  = 2.0

Hz, 1H), 7.36 (t,  $J$  = 8.0 Hz, 1H), 7.28 (s, 2H), 7.22 – 7.15 (m, 2H), 6.73 (s, 2H), 6.57 (s, 1H), 2.22 (s, 6H).

$^{13}C$  NMR (101 MHz, DMSO- $d_6$ )  $\delta$  145.47, 144.94, 142.65, 138.79, 130.19, 123.23, 119.15, 116.29, 113.09, 21.58.

HRMS (ESI)  $m/z$  calcd for  $C_{14}H_{17}N_2O_2S^+$  (M+H) $^+$  277.1005, found 277.1008.

IR (cm $^{-1}$ ): 3407, 3330, 3244, 1585, 1483, 1153, 748, 682.

**(10e) 3-(*m*-tolylamino)benzenesulfonamide**

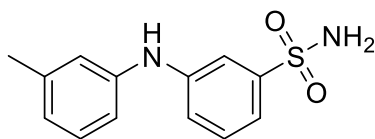

3-(*m*-tolylamino)benzenesulfonamide

Chemical Formula:  $C_{13}H_{14}N_2O_2S$

Exact Mass: 262.0776

Molecular Weight: 262.3270

The general procedure D was followed using *m*-tolylboronic acid (102.0 mg, 0.75 mmol) as starting material. **10e** was obtained as white solid (112.8 mg, 86%) after purification by silica gel flash chromatography (PE:EA:Acetone = 4:1:0.3).

Melting point (°C): 159.1-163.4.

$^1H$  NMR (400 MHz, DMSO- $d_6$ )  $\delta$  8.43 (s, 1H), 7.49 (t,  $J$  = 2.0 Hz, 1H), 7.37 (t,  $J$  = 8.0 Hz, 1H), 7.28 (s, 2H), 7.23 – 7.11 (m, 3H), 6.93 (m, 2H),

6.74 (d,  $J$  = 7.2 Hz, 1H), 2.27 (s, 3H).

$^{13}C$  NMR (101 MHz, DMSO- $d_6$ )  $\delta$  145.47, 144.81, 142.69, 139.05, 130.23, 129.61, 122.23, 119.22, 119.09, 116.39, 115.48, 112.88, 21.67.

HRMS (ESI)  $m/z$  calcd for  $C_{13}H_{15}N_2O_2S^+$  (M+H) $^+$  263.0849, found 263.0850.

IR (cm $^{-1}$ ): 3363, 3255, 1600, 1582, 1582, 1147, 1153, 867, 682.

**(11a) 4-(phenylamino)benzenesulfonamide (CAS: 6786-93-2)**

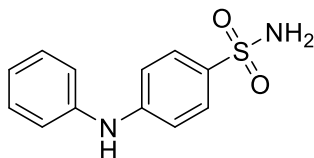

4-(phenylamino)benzenesulfonamide

Chemical Formula:  $C_{12}H_{12}N_2O_2S$

Exact Mass: 248.0619

Molecular Weight: 248.3000

The general procedure E was followed using phenylboronic acid **5a** (91.4 mg, 0.75 mmol) as starting material. **11a** was obtained as white solid (105.0 mg, 85%) after purification by silica gel flash chromatography (PE:EA:Acetone = 3:1:0.3).

Melting point (°C): 145.4-148.1.

$^1\text{H}$  NMR (400 MHz,  $\text{DMSO}-d_6$ )  $\delta$  8.67 (s, 1H), 7.67 – 7.59 (m, 2H), 7.35 – 7.27 (m, 2H), 7.16 (m, 2H), 7.12 – 7.08 (m, 2H), 7.07 (s, 2H), 6.97 (t,  $J = 7.2$  Hz, 1H).

$^{13}\text{C}$  NMR (101 MHz,  $\text{DMSO}-d_6$ )  $\delta$  147.45, 142.03, 133.99, 129.82, 127.95, 122.09, 119.38, 114.71.

HRMS (ESI)  $m/z$  calcd for  $\text{C}_{12}\text{H}_{13}\text{N}_2\text{O}_2\text{S}^+$  ( $\text{M}+\text{H}$ ) $^+$  249.0692, found 249.0690.

IR ( $\text{cm}^{-1}$ ): 3368, 3249, 1585, 1496, 1308, 1141, 730, 693.

**(11b) 4-(p-tolylamino)benzenesulfonamide (CAS: 1027579-14-1)**

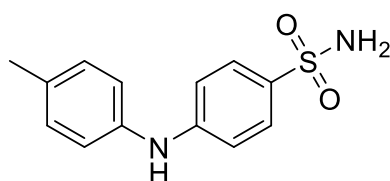

**4-(p-tolylamino)benzenesulfonamide**

Chemical Formula:  $\text{C}_{13}\text{H}_{14}\text{N}_2\text{O}_2\text{S}$

Exact Mass: 262.0776

Molecular Weight: 262.3270

The general procedure E was followed using p-tolylboronic acid (102.0 mg, 0.75 mmol) as starting material. **11b** was obtained as white solid (113.2 mg, 86%) after purification by silica gel flash chromatography (PE:EA:Acetone = 3:1:0.3).

Melting point ( $^{\circ}\text{C}$ ): 162.8-166.3.

$^1\text{H}$  NMR (400 MHz,  $\text{DMSO}-d_6$ )  $\delta$  8.54 (s, 1H), 7.66 – 7.55 (m, 2H), 7.13 (d,  $J = 8.4$  Hz, 2H), 7.10 – 6.94 (m, 6H), 2.26 (s, 3H).

$^{13}\text{C}$  NMR (101 MHz,  $\text{DMSO}-d_6$ )  $\delta$  148.09, 139.28, 133.38, 131.41,

130.25, 127.95, 120.21, 114.05, 20.86.

HRMS (ESI)  $m/z$  calcd for  $\text{C}_{13}\text{H}_{15}\text{N}_2\text{O}_2\text{S}^+$  ( $\text{M}+\text{H}$ ) $^+$  263.0849, found 263.0846.

IR ( $\text{cm}^{-1}$ ): 3357, 3237, 1588, 1312, 1147, 811, 742.

**(11c) 4-((4-(tert-butyl)phenyl)amino)benzenesulfonamide**

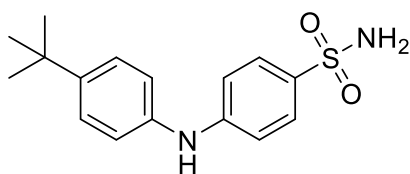

**4-((4-(tert-butyl)phenyl)amino)benzenesulfonamide**

Chemical Formula:  $\text{C}_{16}\text{H}_{20}\text{N}_2\text{O}_2\text{S}$

Exact Mass: 304.1245

Molecular Weight: 304.4080

The general procedure E was followed using 4-(tert-butyl)phenylboronic acid (133.5 mg, 0.75 mmol) as starting material. **11c** was obtained as white solid (123.9 mg, 81%) after purification by silica gel flash chromatography (PE:EA:Acetone = 3:1:0.3).

Melting point ( $^{\circ}\text{C}$ ): 185.1-188.0.

$^1\text{H}$  NMR (400 MHz,  $\text{DMSO}-d_6$ )  $\delta$  8.58 (s, 1H), 7.61 (d,  $J = 8.8$  Hz, 2H), 7.34 (d,  $J = 8.8$  Hz, 2H), 7.10 (d,  $J = 8.68$  Hz, 2H), 7.07 – 7.00

(m, 4H), 1.27 (s, 9H).

$^{13}\text{C}$  NMR (101 MHz,  $\text{DMSO}-d_6$ )  $\delta$  147.92, 144.67, 139.28, 133.45, 127.95, 126.44, 119.59, 114.17, 34.42, 31.74.

HRMS (ESI)  $m/z$  calcd for  $\text{C}_{16}\text{H}_{21}\text{N}_2\text{O}_2\text{S}^+$  ( $\text{M}+\text{H}$ ) $^+$  305.1318, found 305.1317.

IR ( $\text{cm}^{-1}$ ): 3358, 3259, 2952, 1586, 1497, 1305, 1131, 825.

**(11d) 4-((4-chlorophenyl)amino)benzenesulfonamide (CAS: 1348965-14-9)**

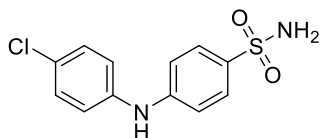

4-((4-chlorophenyl)amino)benzenesulfonamide

Chemical Formula:  $C_{12}H_{11}ClN_2O_2S$

Exact Mass: 282.0230

Molecular Weight: 282.7420

The general procedure E was followed using (4-chlorophenyl)boronic acid (117.0 mg, 0.75 mmol) as starting material. **11d** was obtained as white solid (84.9 mg, 60%) after purification by silica gel flash chromatography (PE:EA:Acetone = 3:1:0.3).

Melting point ( $^{\circ}C$ ): 163.2-164.6.

$^1H$  NMR (400 MHz,  $DMSO-d_6$ )  $\delta$  8.78 (s, 1H), 7.68 – 7.61 (m, 2H), 7.36 – 7.29 (m, 2H), 7.19 – 7.14 (m, 2H), 7.11 (m, 4H).

$^{13}C$  NMR (101 MHz,  $DMSO-d_6$ )  $\delta$  146.84, 141.19, 134.64, 129.64, 127.96, 125.17, 120.50, 115.22.

HRMS (ESI)  $m/z$  calcd for  $C_{12}H_{12}ClN_2O_2S^+$  ( $M+H$ ) $^+$  283.0302, found 283.0307.

IR ( $cm^{-1}$ ): 3357, 3250, 1519, 1487, 1147, 812, 659.

**(11e) 4-((4-fluorophenyl)amino)benzenesulfonamide (CAS: 1294519-59-7)**

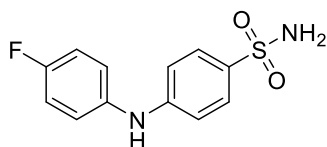

4-((4-fluorophenyl)amino)benzenesulfonamide

Chemical Formula:  $C_{12}H_{11}FN_2O_2S$

Exact Mass: 266.0525

Molecular Weight: 266.2904

The general procedure E was followed using (4-fluorophenyl)boronic acid (105.0 mg, 0.75 mmol) as starting material. **11e** was obtained as grey solid (70.0 mg, 53%) after purification by silica gel flash chromatography (PE:EA:Acetone = 3:1:0.3).

Melting point ( $^{\circ}C$ ): 151.6-155.7.

$^1H$  NMR (400 MHz,  $DMSO-d_6$ )  $\delta$  8.62 (s, 1H), 7.62 (d,  $J$  = 8.8 Hz, 2H), 7.25 – 7.11 (m, 4H), 7.11 – 6.93 (m, 4H).

$^{13}C$  NMR (101 MHz,  $DMSO-d_6$ )  $\delta$  157.92 (d,  $J$  = 237 Hz), 147.91, 138.30 (d,  $J$  = 2 Hz), 133.81, 127.99, 121.87 (d,  $J$  = 8 Hz), 116.42 (d,  $J$  = 23 Hz), 114.14.

$^{19}F$  NMR (376 MHz,  $DMSO-d_6$ )  $\delta$  -121.16.

HRMS (ESI)  $m/z$  calcd for  $C_{12}H_{12}FN_2O_2S^+$  ( $M+H$ ) $^+$  267.0598, found 267.0595.

IR ( $cm^{-1}$ ): 3368, 3249, 1585, 1308, 1141, 693.

**(11f) 4-((3,5-dimethylphenyl)amino)benzenesulfonamide (CAS: 1294519-57-5)**

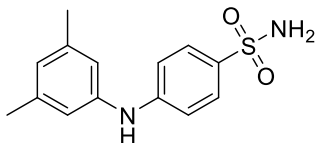

4-((3,5-dimethylphenyl)amino)benzenesulfonamide

Chemical Formula:  $C_{14}H_{16}N_2O_2S$

Exact Mass: 276.0932

Molecular Weight: 276.3540

The general procedure E was followed using (3,5-dimethylphenyl)boronic acid (112.5 mg, 0.75 mmol) as starting material. **11f** was obtained as brown solid (124.1 mg, 90%) after purification by silica gel flash chromatography (PE:EA:Acetone = 3:1:0.3).

Melting point ( $^{\circ}C$ ): 151.1-154.9.

$^1H$  NMR (400 MHz,  $DMSO-d_6$ )  $\delta$  8.52 (s, 1H), 7.61 (d,  $J$  = 8.8 Hz, 2H), 7.12 – 7.00 (m, 4H), 6.77 (s, 2H), 6.61 (s, 1H), 2.23 (s, 6H).

$^{13}C$  NMR (101 MHz,  $DMSO-d_6$ )  $\delta$  147.68, 141.90, 138.83, 133.70, 127.91, 123.88, 117.23, 114.78, 21.54.

HRMS (ESI)  $m/z$  calcd for  $C_{14}H_{17}N_2O_2S^+$  ( $M+H$ ) $^+$  277.1005, found 277.1002.

IR (cm<sup>-1</sup>): 3381, 3304, 3243, 1582, 1278, 1148, 824.

**(11g) 4-(*m*-tolylamino)benzenesulfonamide (CAS: 1800547-17-4)**

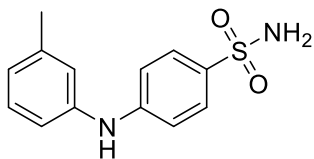

4-(*m*-tolylamino)benzenesulfonamide

Chemical Formula: C<sub>13</sub>H<sub>14</sub>N<sub>2</sub>O<sub>2</sub>S

Exact Mass: 262.0776

Molecular Weight: 262.3270

The general procedure E was followed using *m*-tolylboronic acid (102.0 mg, 0.75 mmol) as starting material. **11g** was obtained as grey solid (116.4 mg, 89%) after purification by silica gel flash chromatography (PE:EA:Acetone = 3:1:0.3).

Melting point (°C): 93.2-96.5.

<sup>1</sup>H NMR (400 MHz, DMSO-*d*<sub>6</sub>) δ 8.60 (s, 1H), 7.67 – 7.57 (m, 2H), 7.19 (t, *J* = 7.6 Hz, 1H), 7.12 – 7.01 (m, 4H), 6.96 (m, 2H), 6.79 (d, *J* = 7.6 Hz, 1H),

2.28 (s, 3H).

<sup>13</sup>C NMR (101 MHz, DMSO-*d*<sub>6</sub>) δ 147.57, 141.97, 139.09, 133.84, 129.64, 127.93, 122.94, 119.99, 116.58, 114.74, 21.63.

HRMS (ESI) *m/z* calcd for C<sub>13</sub>H<sub>15</sub>N<sub>2</sub>O<sub>2</sub>S<sup>+</sup> (*M*+*H*)<sup>+</sup> 263.0849, found 263.0845.

IR (cm<sup>-1</sup>): 3393, 3346, 3250, 1576, 1154, 1091, 720.

**(11h) 4-((3-methoxyphenyl)amino)benzenesulfonamide (CAS: 1348122-53-1)**

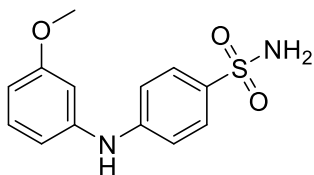

4-((3-methoxyphenyl)amino)benzenesulfonamide

Chemical Formula: C<sub>13</sub>H<sub>14</sub>N<sub>2</sub>O<sub>3</sub>S

Exact Mass: 278.0725

Molecular Weight: 278.3260

The general procedure E was followed using (3-methoxyphenyl)boronic acid (114.0 mg, 0.75 mmol) as starting material. **11h** was obtained as grey solid (83.8 mg, 60%) after purification by silica gel flash chromatography (PE:EA:Acetone = 3:1:0.3).

Melting point (°C): 130.9-135.9.

<sup>1</sup>H NMR (400 MHz, DMSO-*d*<sub>6</sub>) δ 8.68 (s, 1H), 7.64 (d, *J* = 8.8 Hz, 2H), 7.21 (t, *J* = 8.0 Hz, 1H), 7.16 – 7.02 (m, 4H), 6.75 (dd, *J* = 8.0, 1.6 Hz, 1H), 6.69 (t, *J* = 2.0 Hz, 1H), 6.54 (dd, *J* = 8.0, 2.0 Hz, 1H), 3.74 (s, 3H).

<sup>13</sup>C NMR (101 MHz, DMSO-*d*<sub>6</sub>) δ 160.65, 147.21, 143.36, 134.18, 130.59, 127.93, 115.12, 111.47, 107.54, 104.75, 55.42.

HRMS (ESI) *m/z* calcd for C<sub>13</sub>H<sub>15</sub>N<sub>2</sub>O<sub>3</sub>S<sup>+</sup> (*M*+*H*)<sup>+</sup> 279.0798, found 279.0799.

IR (cm<sup>-1</sup>): 3335, 3244, 1585, 1458, 1148, 777, 743.



## E. Cu-catalyzed selective arylation of aminobenzenesulfonamide on larger scale

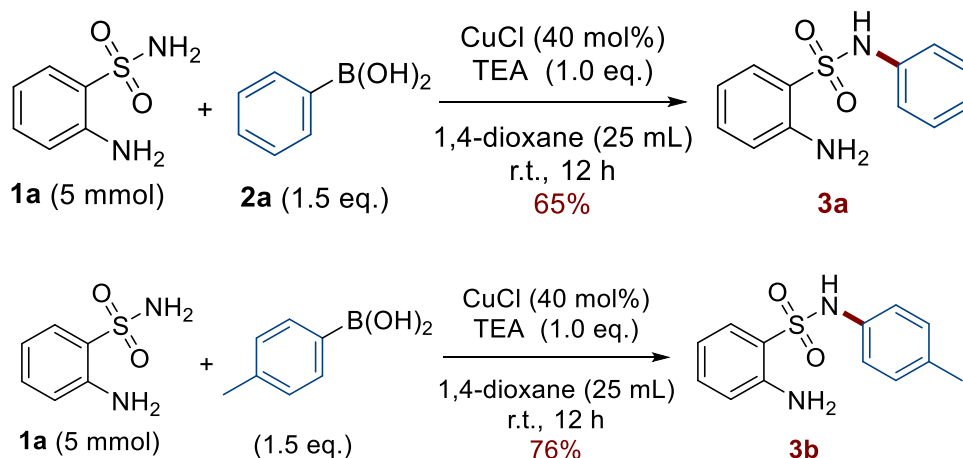

A flame-dried 100 mL column reaction flask was placed with a stirring bar. Then, 2-aminobenzenesulfonamide (861 mg, 5 mmol, 1.0 eq.), CuCl (198 mg, 2 mmol, 40 mol%), Et<sub>3</sub>N (700  $\mu$ L, 5 mmol, 1.0 eq.), arylboronic acid (7.5 mmol, 1.5 eq.) and 1,4-dioxane (25 mL) were added. The resulting mixture was stirred vigorously at ambient temperature for 12 hours. The reaction mixture was filtered, concentrated and then purified by column chromatography on silica gel to give the target products.

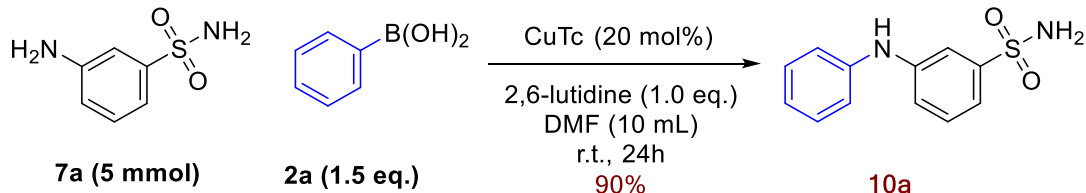

A flame-dried 100 mL pear shaped flask was placed with a stirring bar. Then, 3-aminobenzenesulfonamide (861 mg, 5 mmol, 1.0 eq.), CuTC (191 mg, 1 mmol, 20 mol%), 2,6-Lutidine (576  $\mu$ L, 5 mmol, 1.0 eq.), arylboronic acid (7.5 mmol, 1.5 eq.) and DMF (10 mL) were added. The resulting mixture was stirred vigorously at ambient temperature (Pear shaped flask open) for 24 hours. The reaction mixture was treated with EtOAc (50 mL) and water (50 mL). The organic layer was separated, and the aqueous layer was extracted with EtOAc (3  $\times$  10.0 mL). The combined organic phase was washed with brine (2  $\times$  10.0 mL), dried over anhydrous Na<sub>2</sub>SO<sub>4</sub>, and concentrated to afford residue, which was purified by column chromatography on silica gel to give the target product **10a**.

## F. Control experiments

The following experiments were performed to give some information of the observed chemoselectivity.

As depicted in Equation 1, when p-toluidine, 4-methylbenzenesulfonamide and phenylboronic acid were mixed in 1:1:1 ratio and exposed to reaction conditions that were depicted in Scheme 4 of the manuscript, selective arylation of the 4-methylbenzenesulfonamide was observed. There was no product deriving from the arylation of the arylamino group. Then p-toluidine and 4-methylbenzenesulfonamide were reacted with  $\text{PhB(OH)}_2$  under the similar reaction conditions (Eq. 2 and Eq. 3). For p-toluidine, 47% yield of the arylated product was obtained. The yield of the arylated product of 4-methylbenzenesulfonamide was 51%. These data clearly showed the superior reactivity of the sulfonamide group, although both amino and sulfonamide group were competent CEL coupling partners under these conditions.

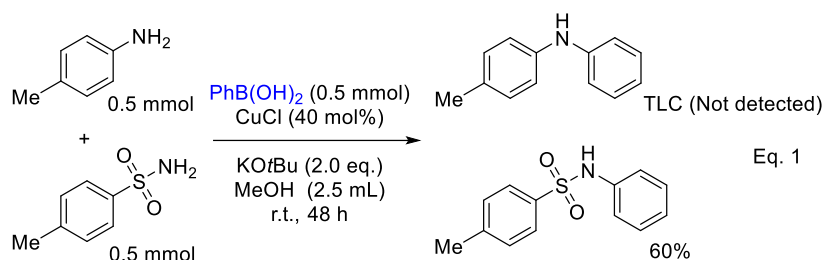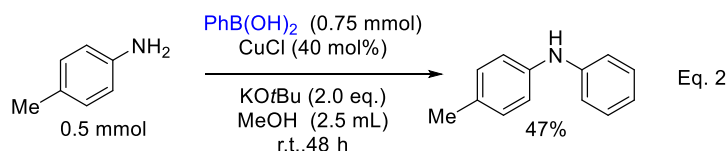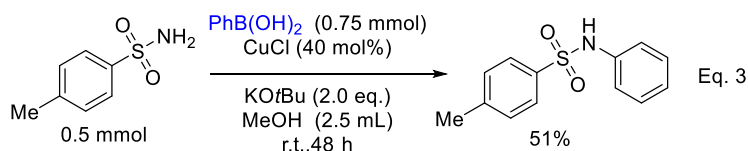

A similar procedure was also performed using the reaction conditions depicted in Scheme 5. In the 1:1:1 mixed case (Eq. 4), selective arylated product of p-toluidine was obtained 65% yield, while 4-methylbenzenesulfonamide was reluctant to be arylated. The separated experiments revealed that the reactivity of arylamino group remained (Eq. 5), while the sulfonamide group was still hard to be arylated (Eq. 6). This implied the observed preference towards arylamino group in Scheme 5 might derive from the instinctive inertness of the sulfonamide group under such conditions.

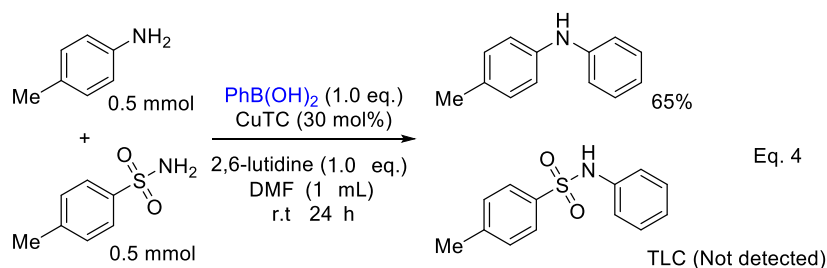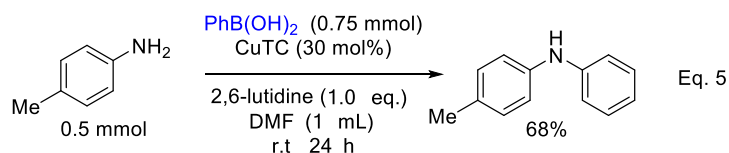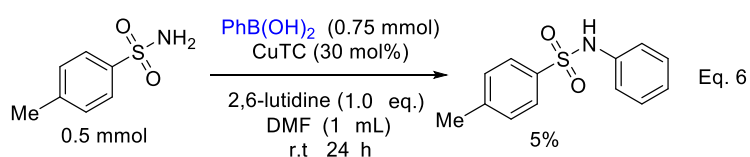

#### 4-methyl-N-phenylaniline (CAS: 620-84-8)

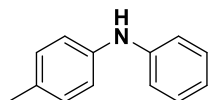

4-methyl-N-phenylaniline  
Chemical Formula:  $C_{13}H_{13}N$   
Exact Mass: 183.1048  
Molecular Weight: 183.2540

4-methyl-N-phenylaniline (Org. Lett. 2018, 20, 1134-1137)

$^1H$  NMR ( $CDCl_3$ ):  $\delta$  7.25 (t,  $J = 7.3$  Hz, 2H), 7.10 (d,  $J = 8.1$  Hz, 2H), 7.02-7.00 (m, 4H), 6.89 (t,  $J = 7.3$  Hz, 1H), 5.60 (brs, 1H), 2.32 (s, 3H).

$^{13}C$  NMR ( $CDCl_3$ ):  $\delta$  144.1, 140.4, 131.1, 130.0, 129.4, 120.4, 119.0, 117.0, 20.8.

#### 4-methyl-N-phenylbenzenesulfonamide (CAS: 68-34-8)

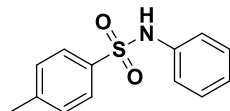

4-methyl-N-phenylbenzenesulfonamide  
Chemical Formula:  $C_{13}H_{13}NO_2S$   
Exact Mass: 247.0667  
Molecular Weight: 247.3120

4-methyl-N-phenylbenzenesulfonamide (J. Org. Chem. 2018, 83, 14385-14395)

$^1H$  NMR ( $CDCl_3$ ): 7.65 (d,  $J = 8.4$  Hz, 2H), 7.26-7.22 (m, 4H), 7.12 (t,  $J = 7.6$  Hz, 1H), 7.06 (d,  $J = 8.4$  Hz, 2H), 6.75 (br s, 1H), 2.38 (s, 3H).

$^{13}C$  NMR ( $CDCl_3$ )  $\delta$  143.9, 136.5, 136.1, 129.6, 129.3, 127.3, 125.3, 121.5, 21.5.

### **3. Copies of NMR spectra**

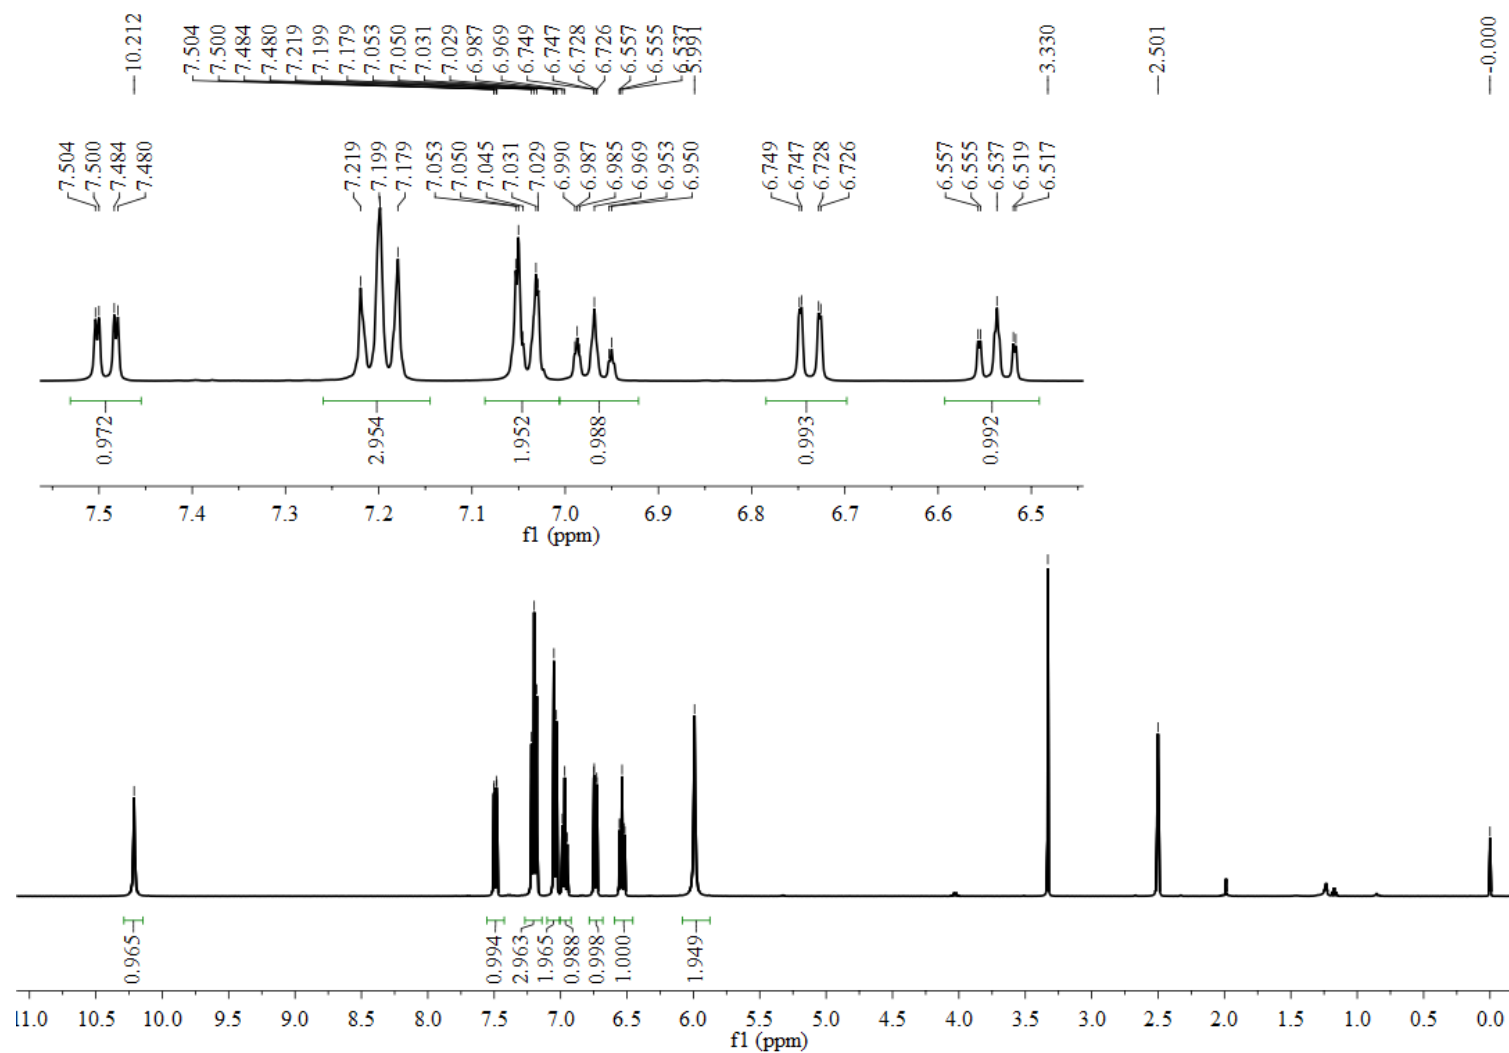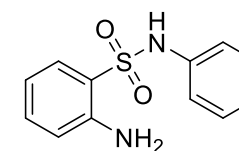

**3a, DMSO-*d*<sub>6</sub>**

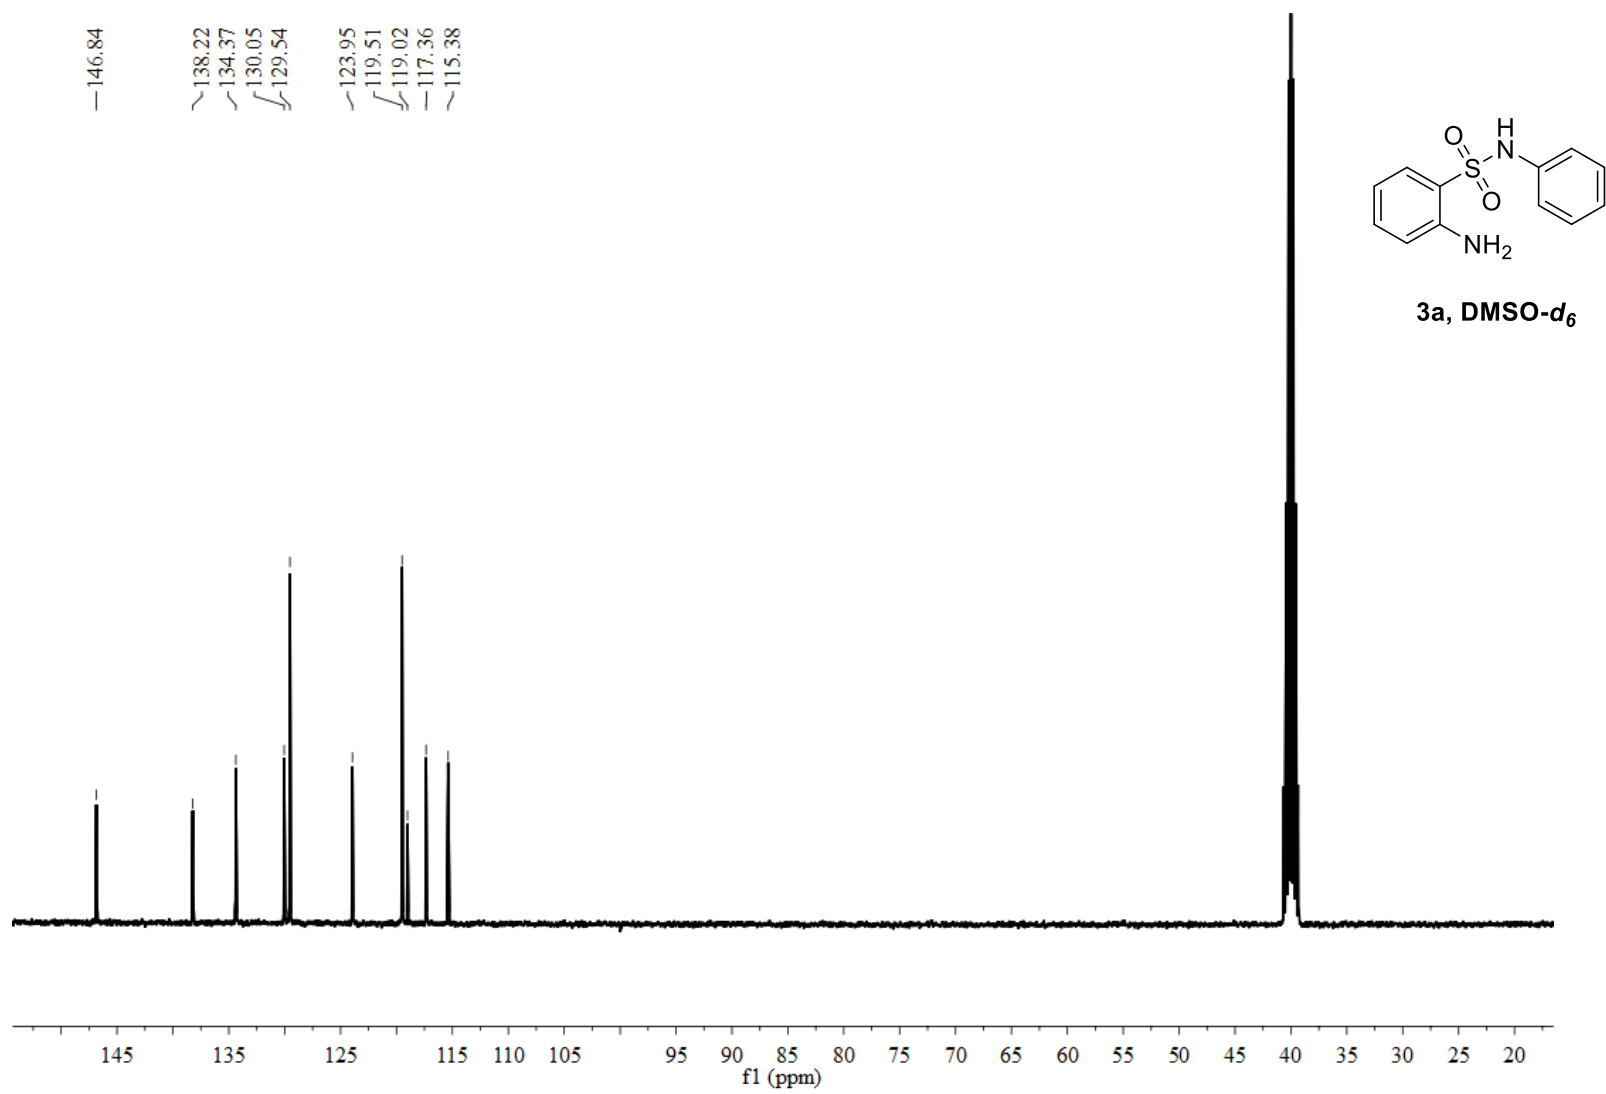

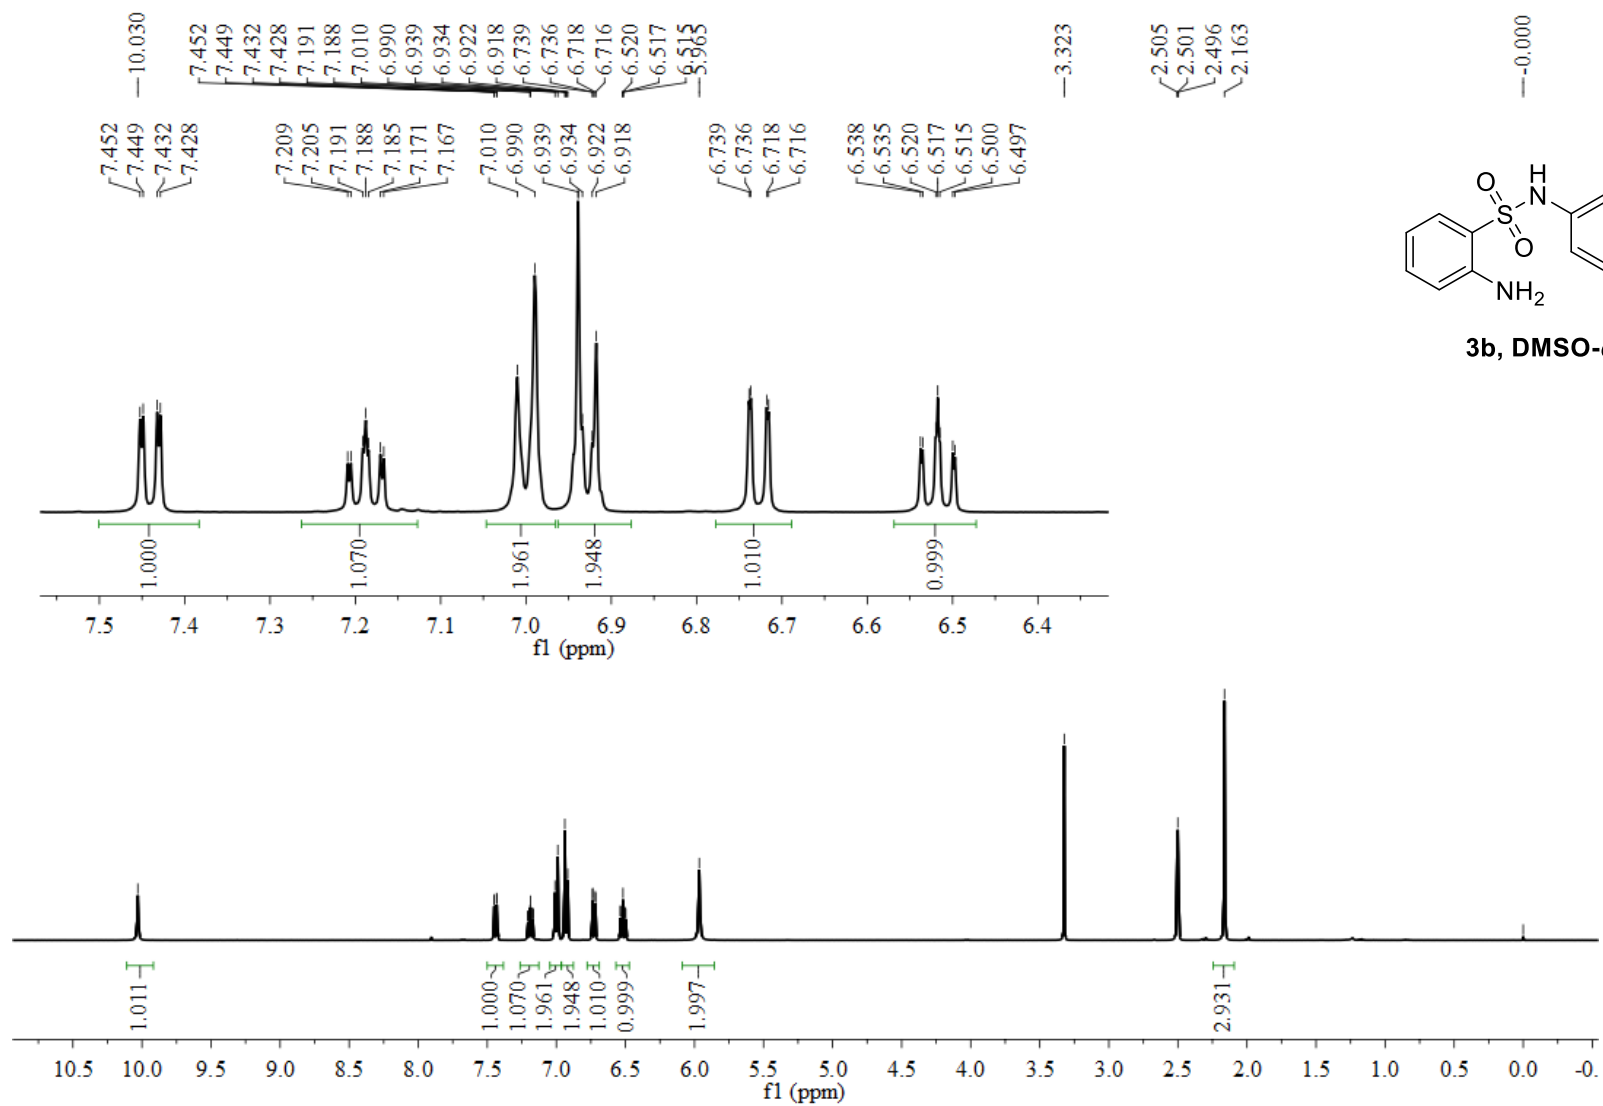

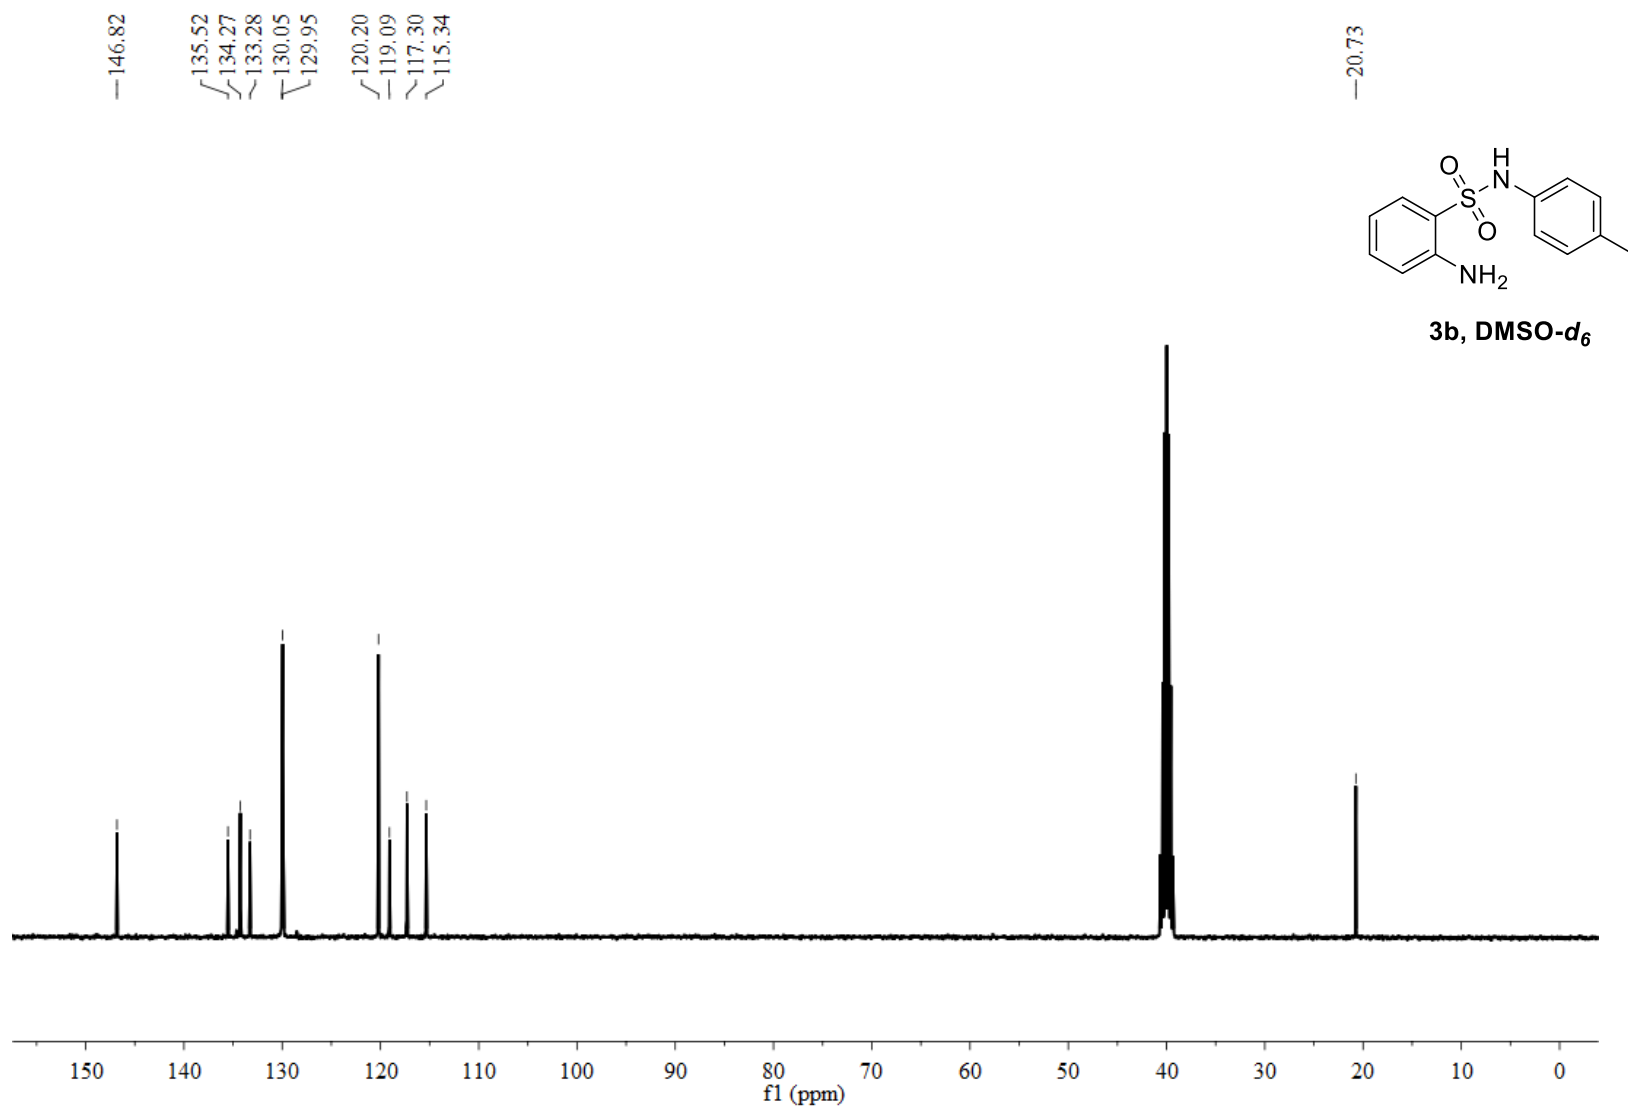



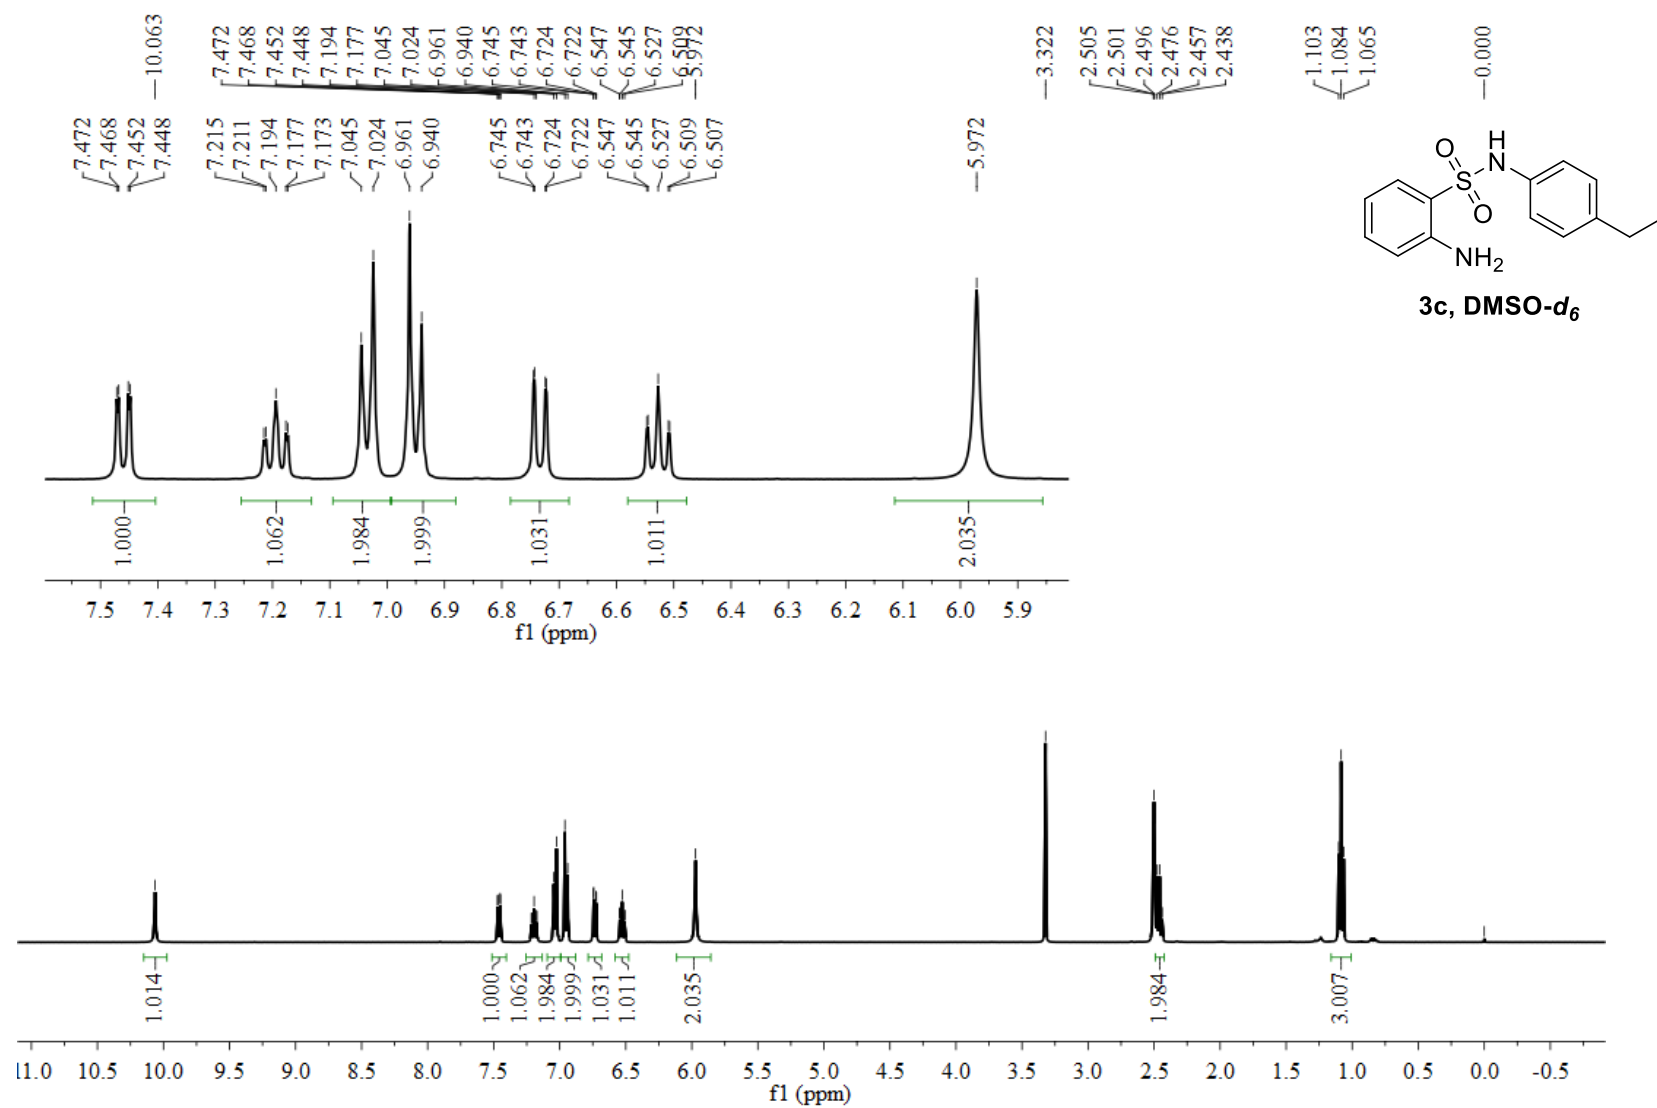

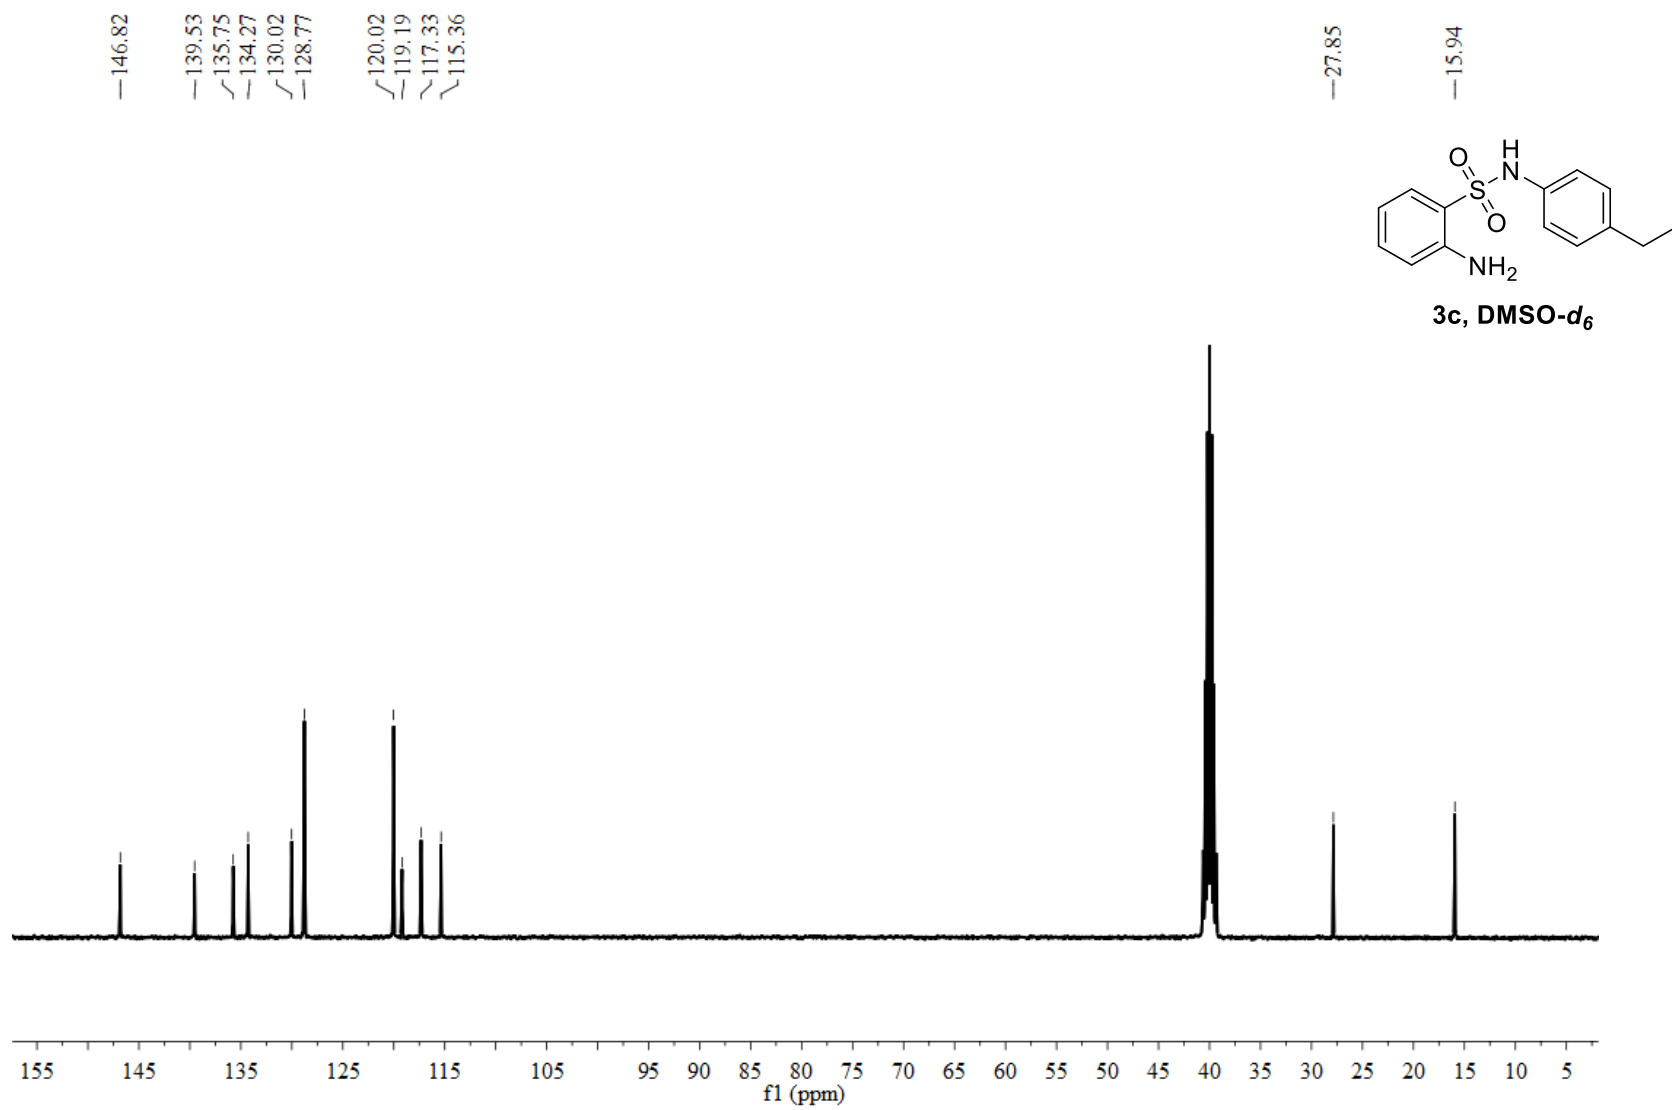

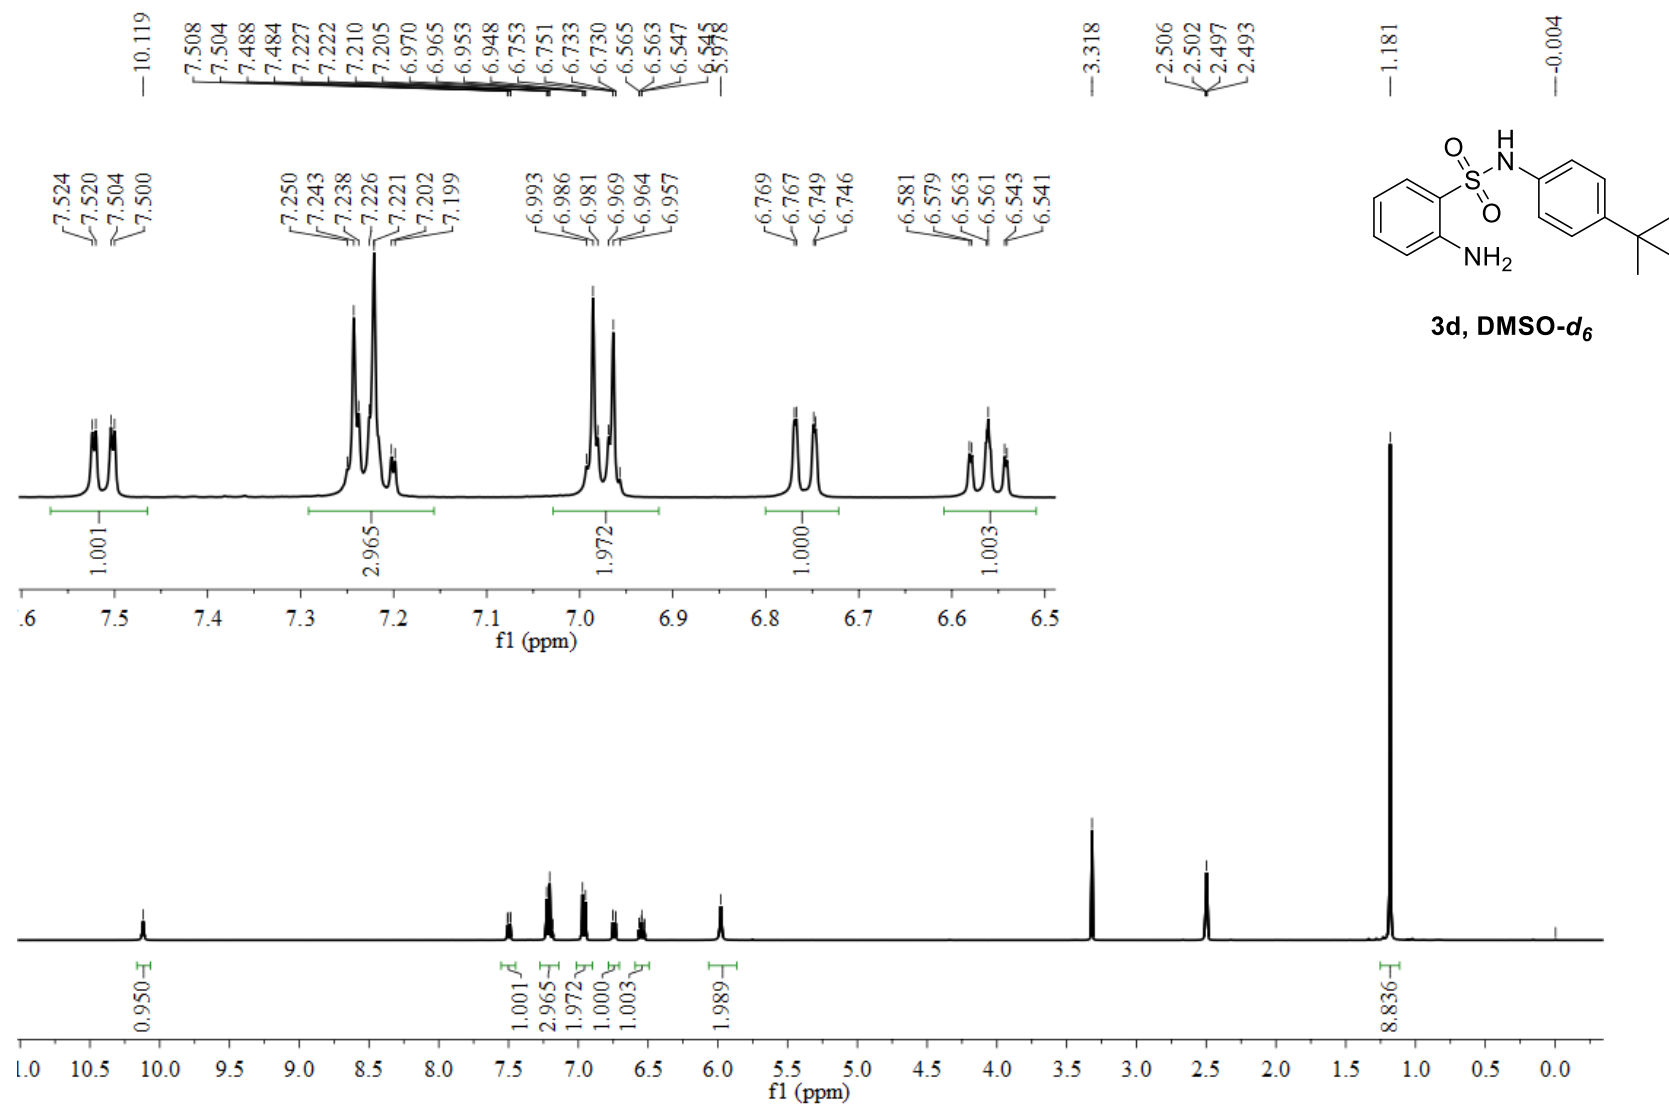

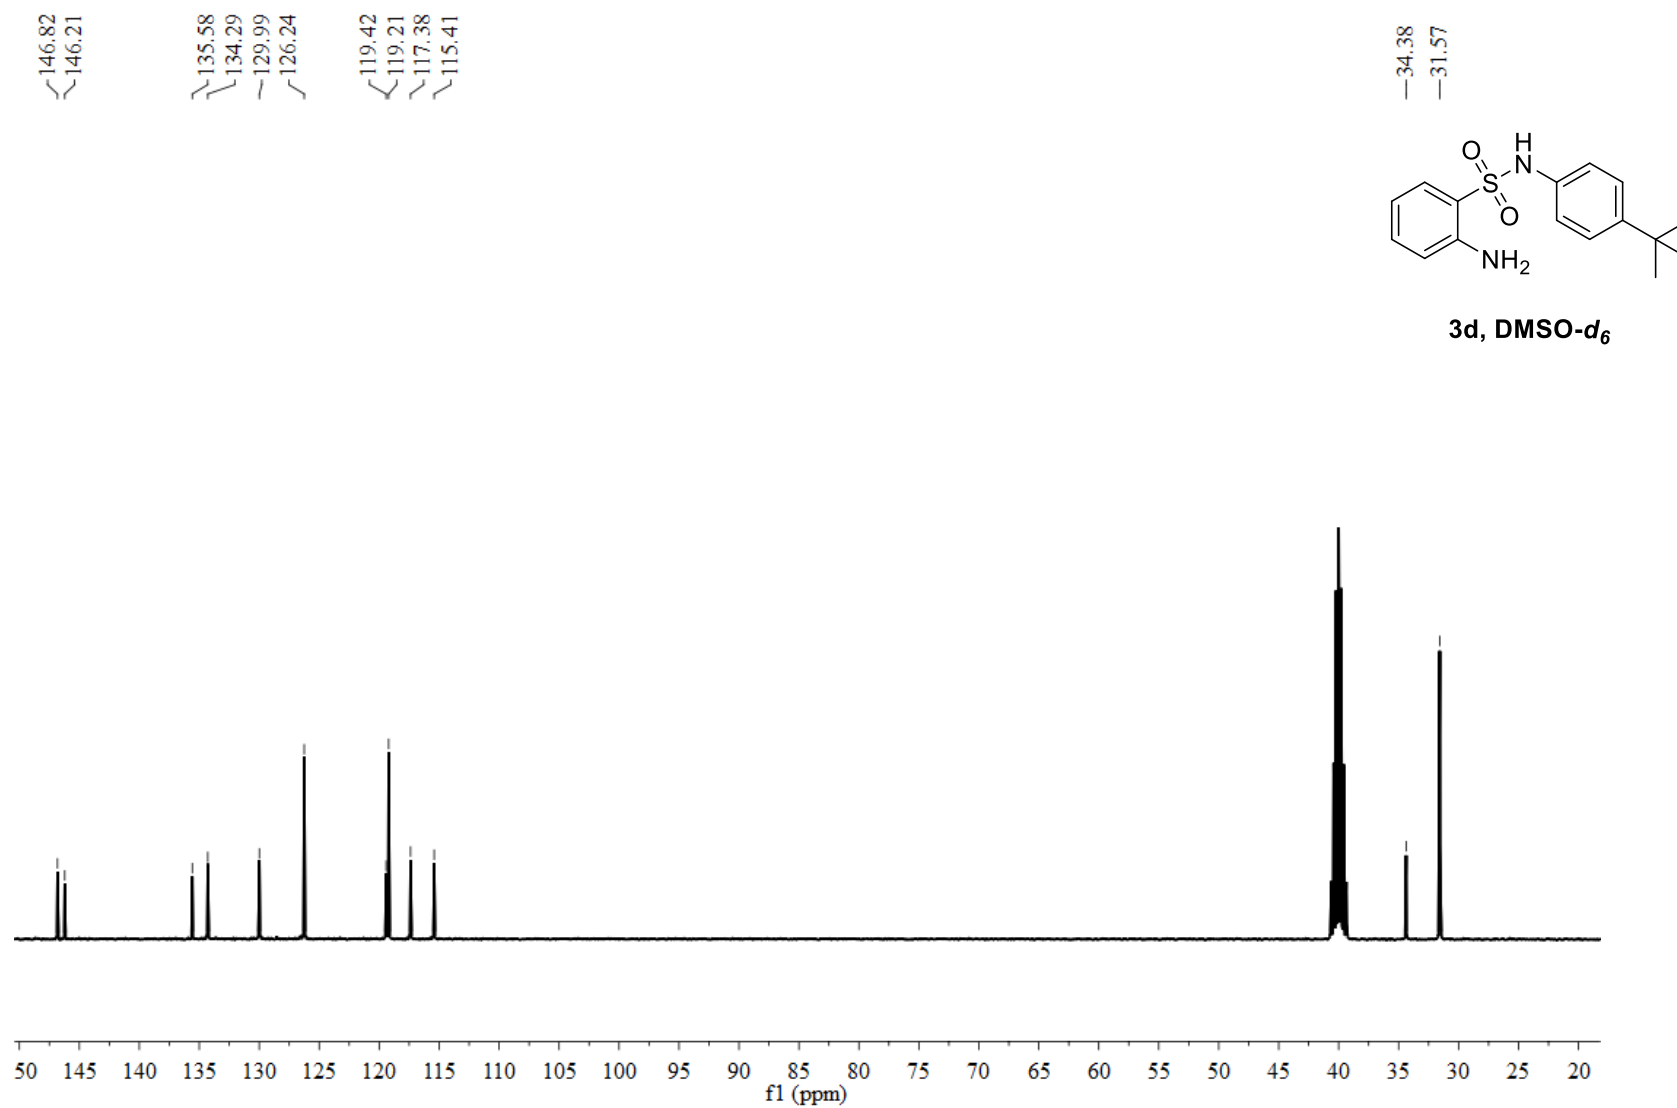

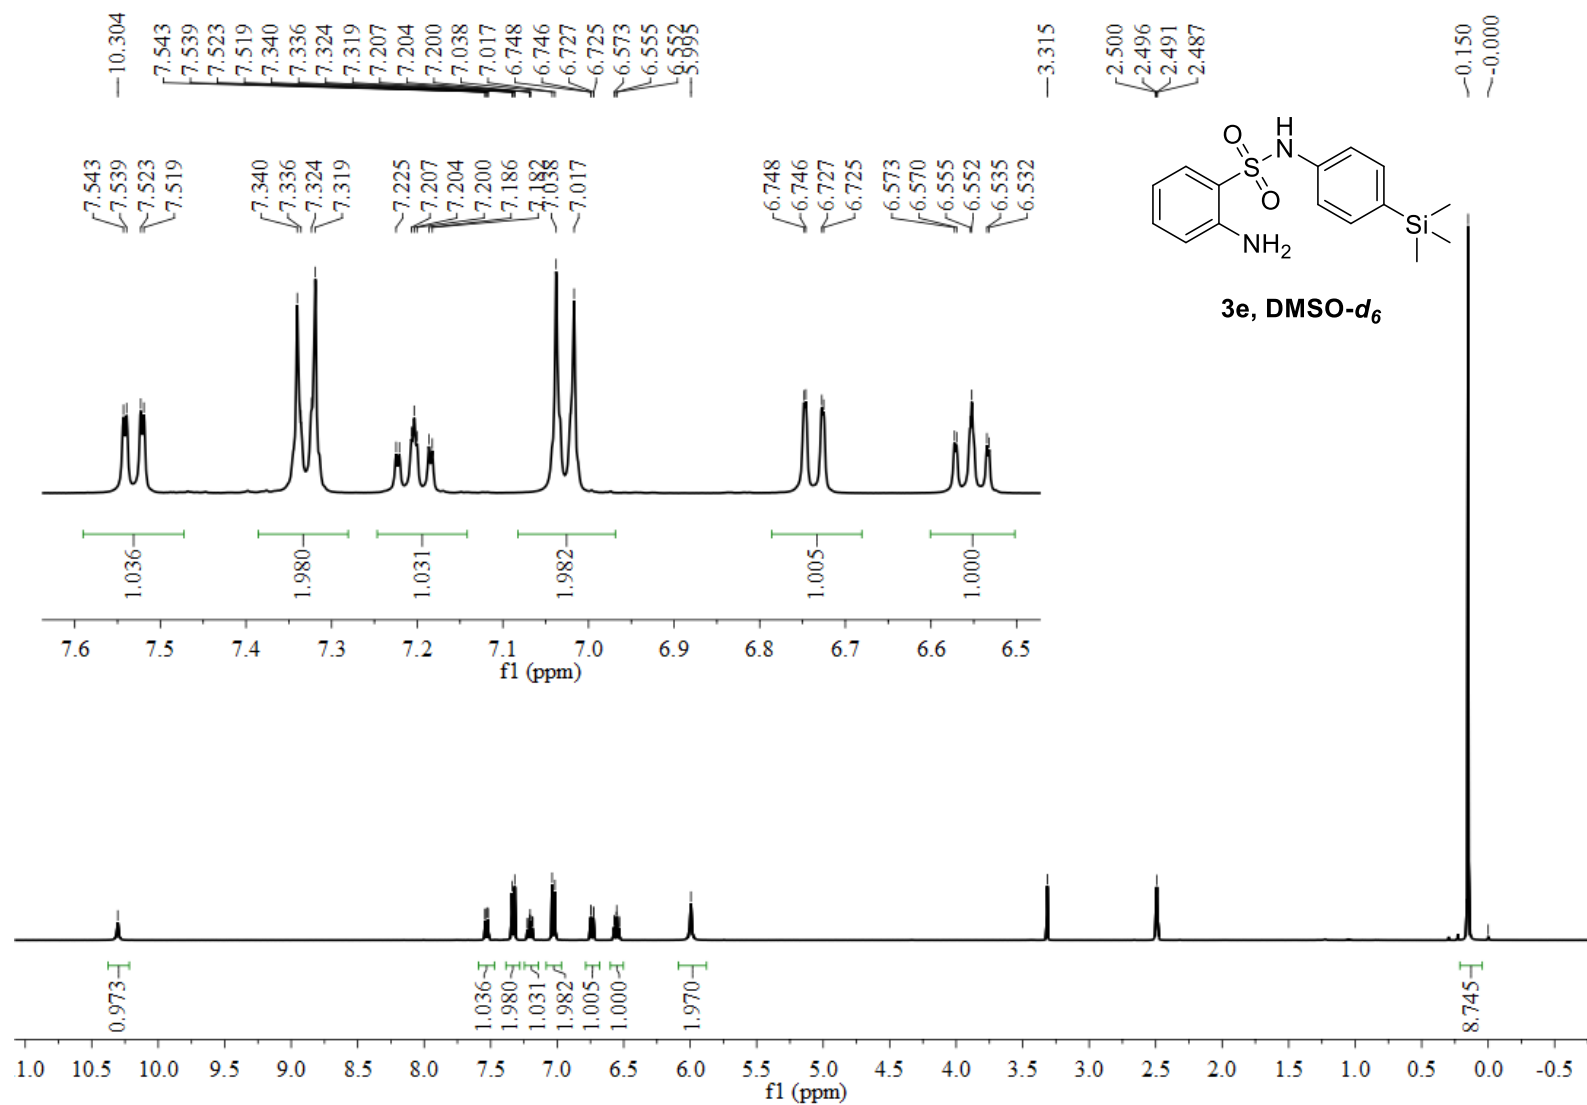

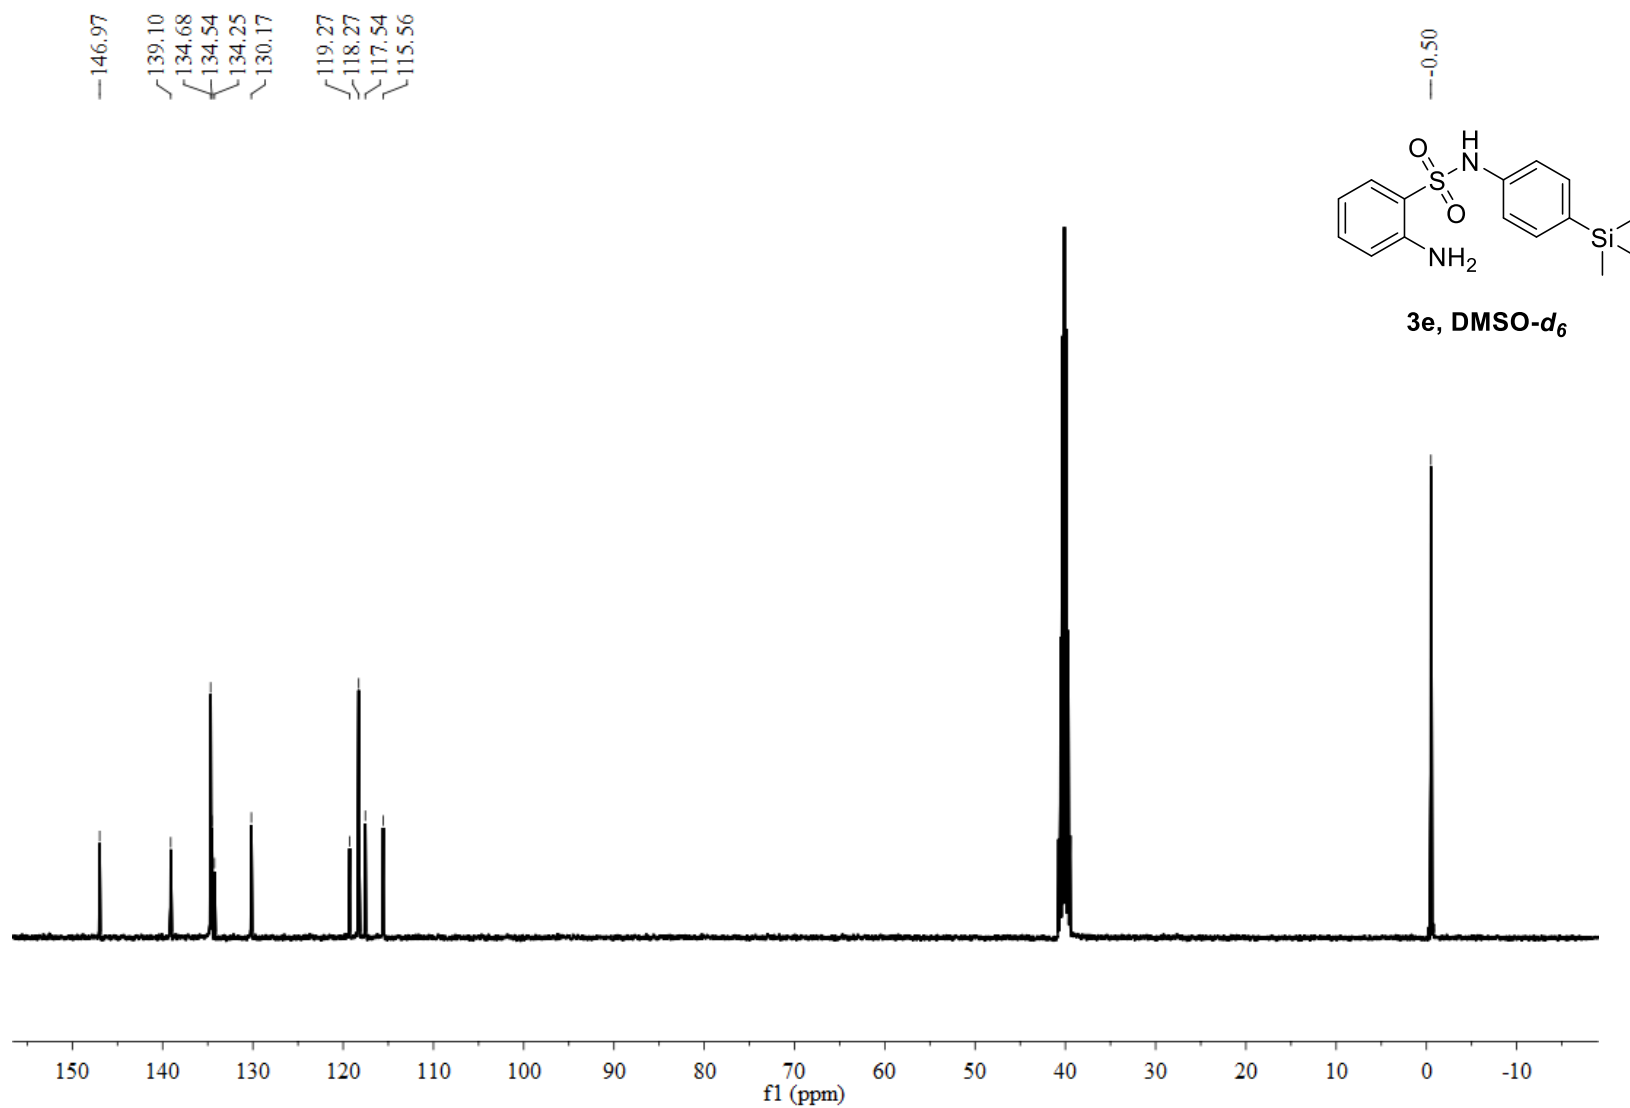

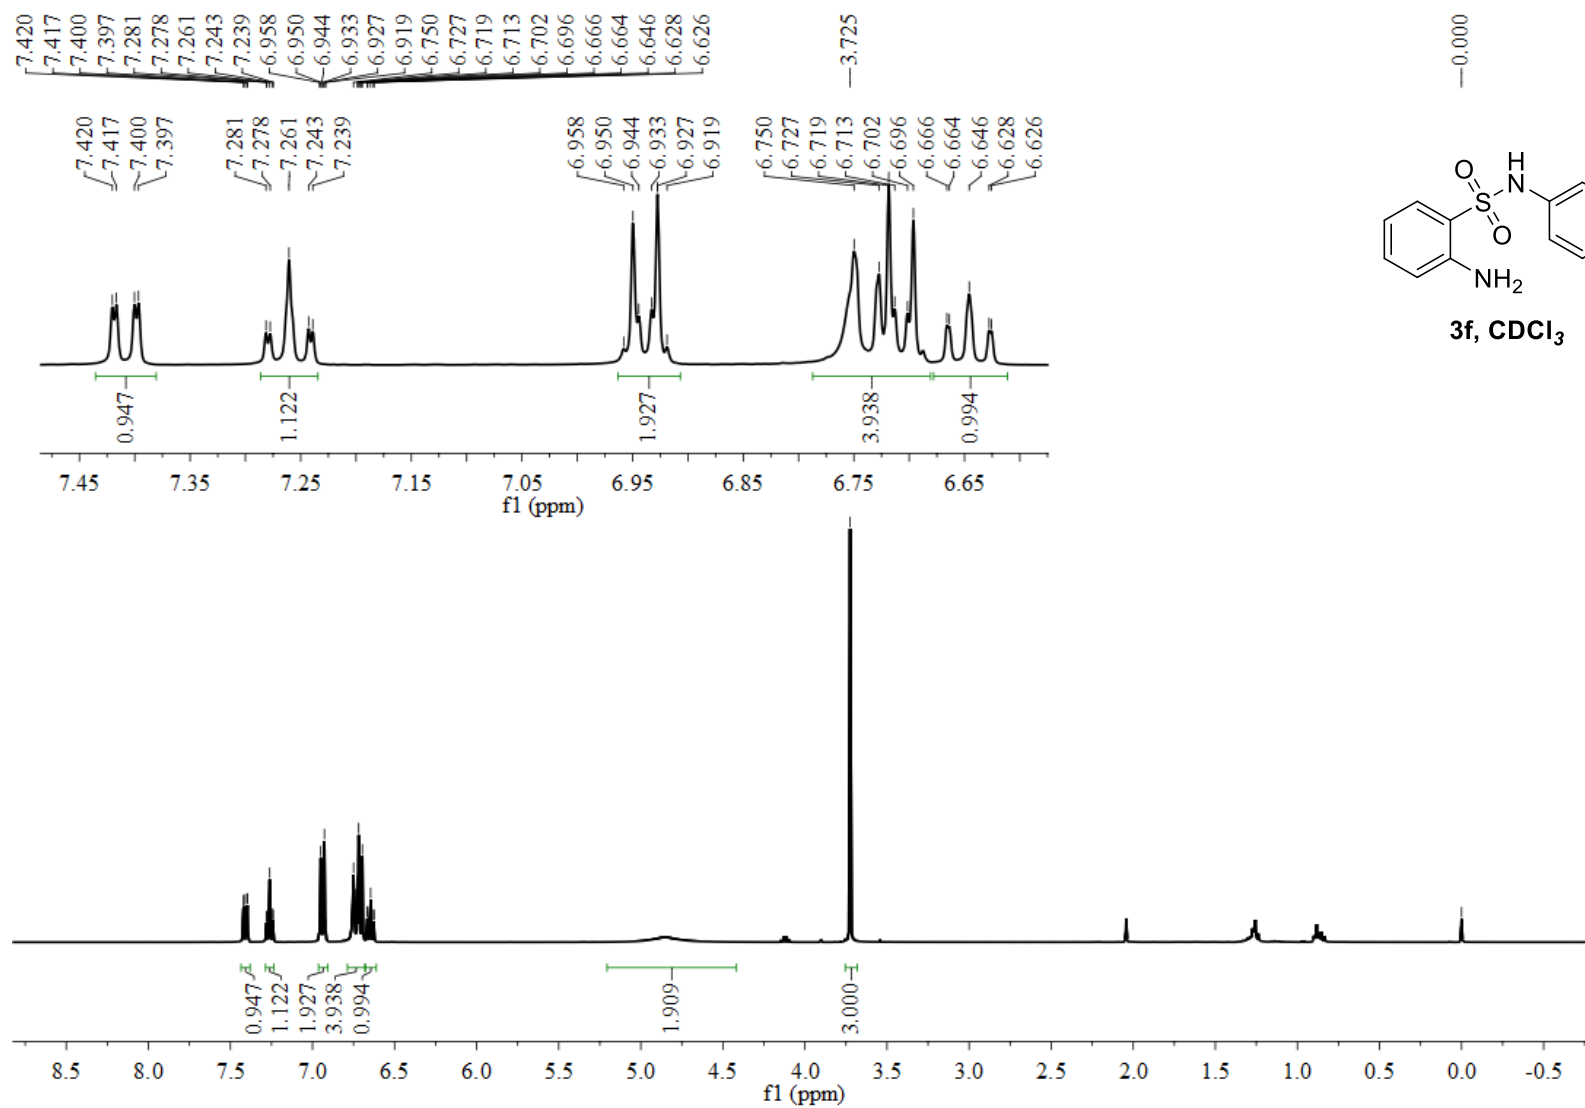

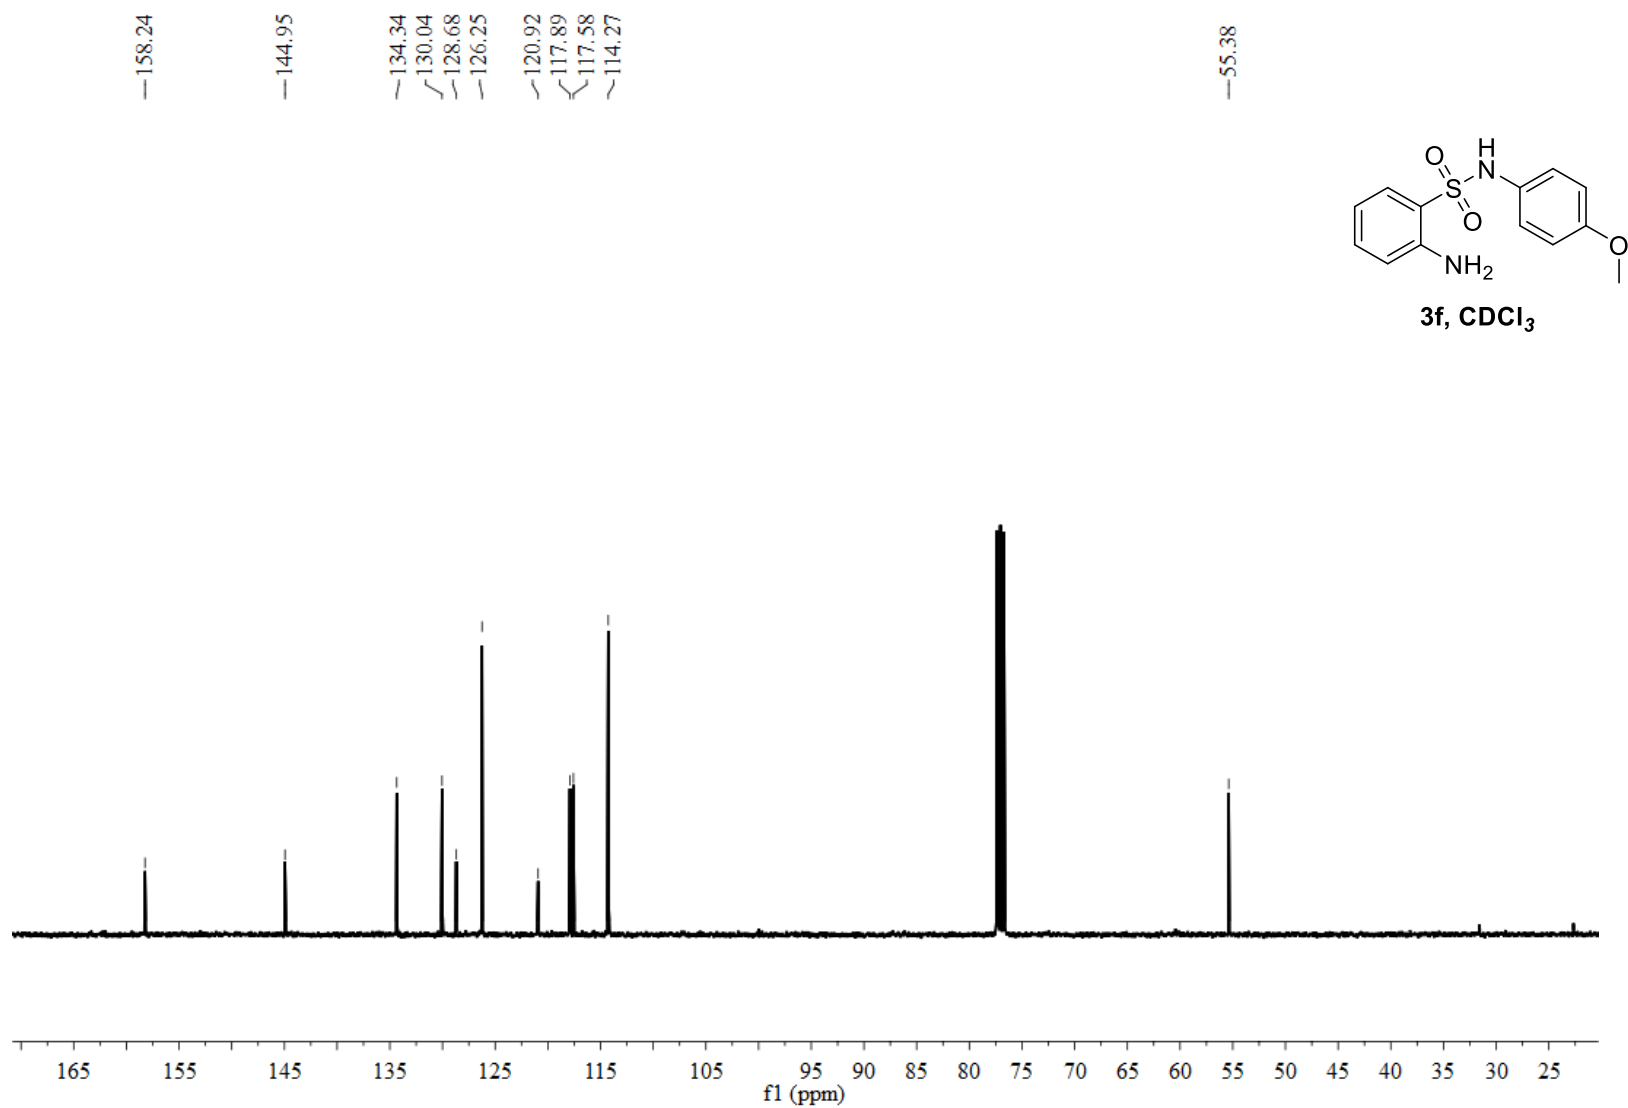



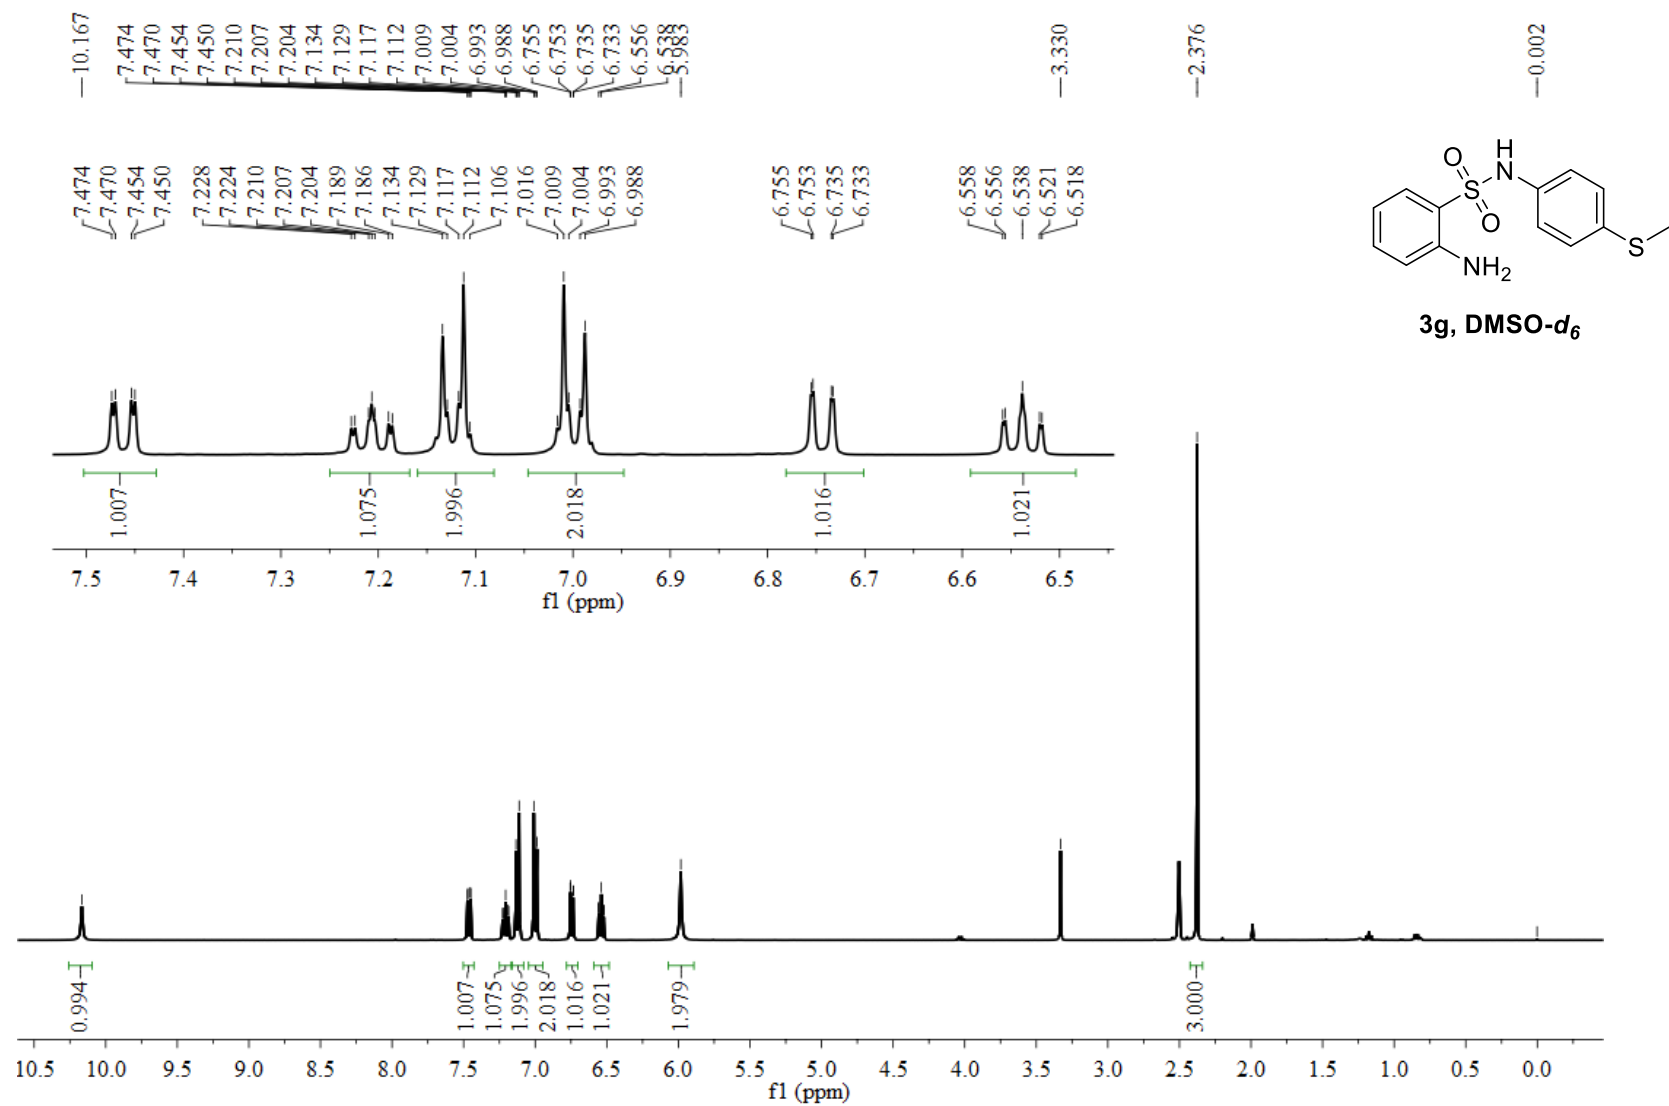

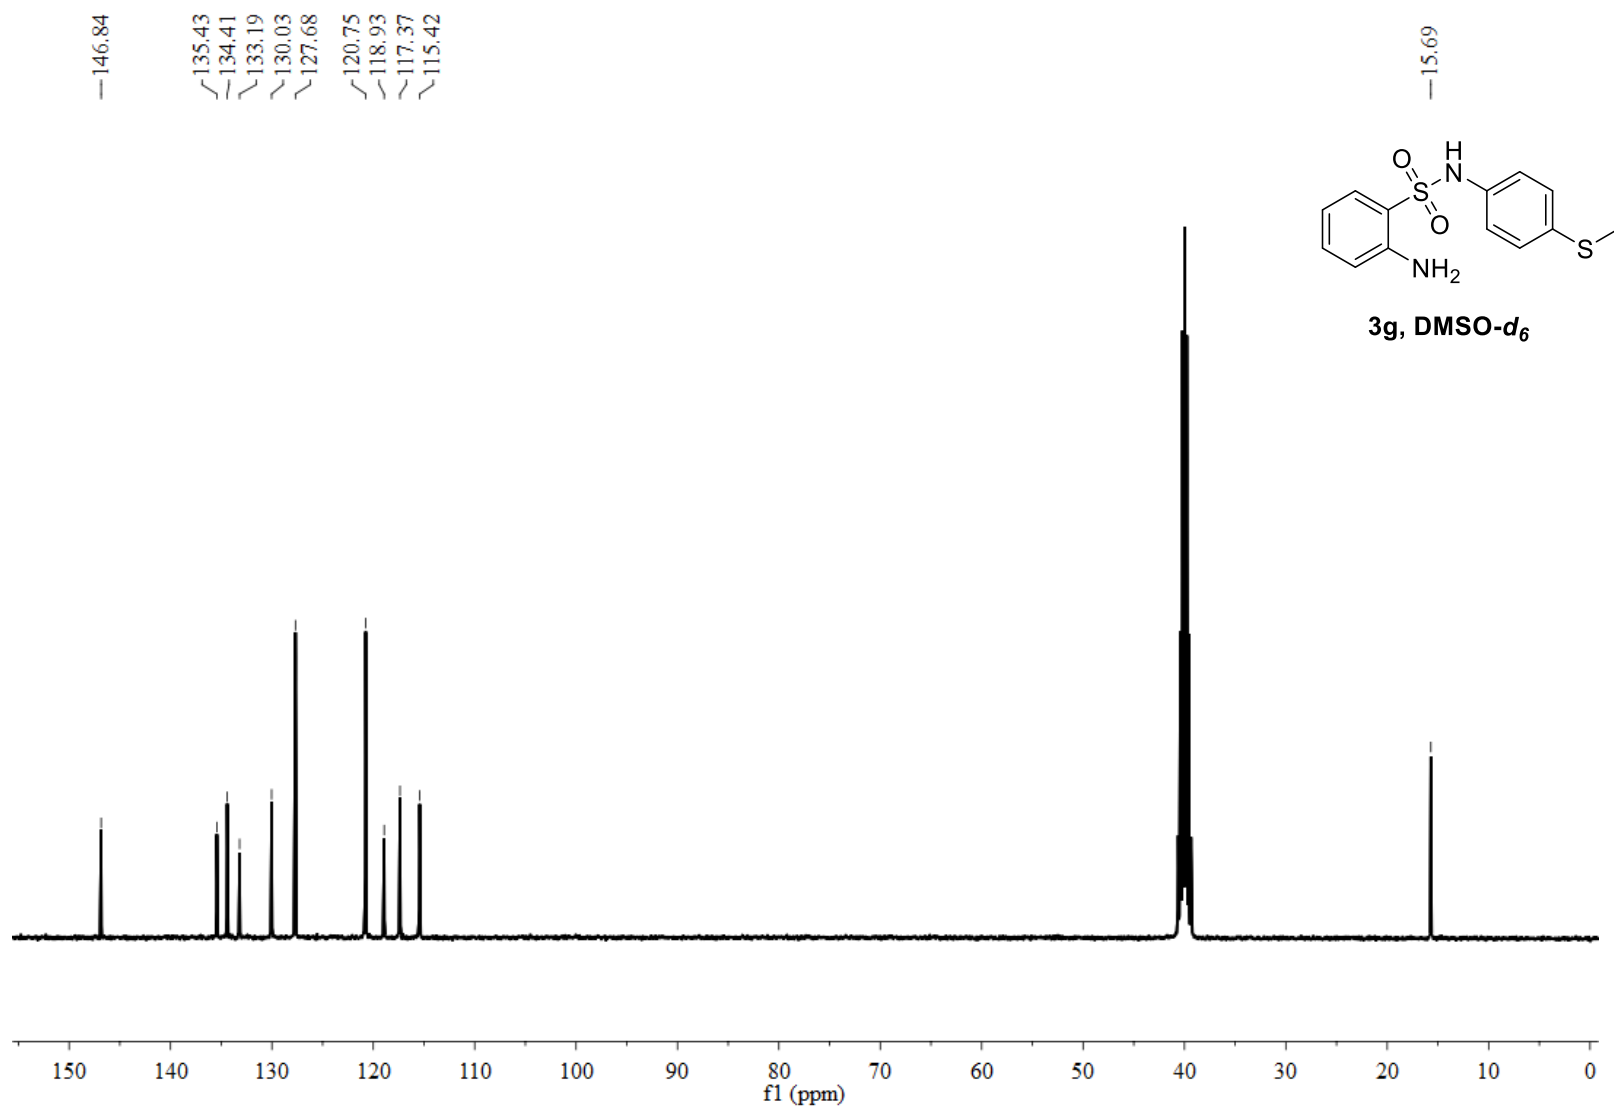

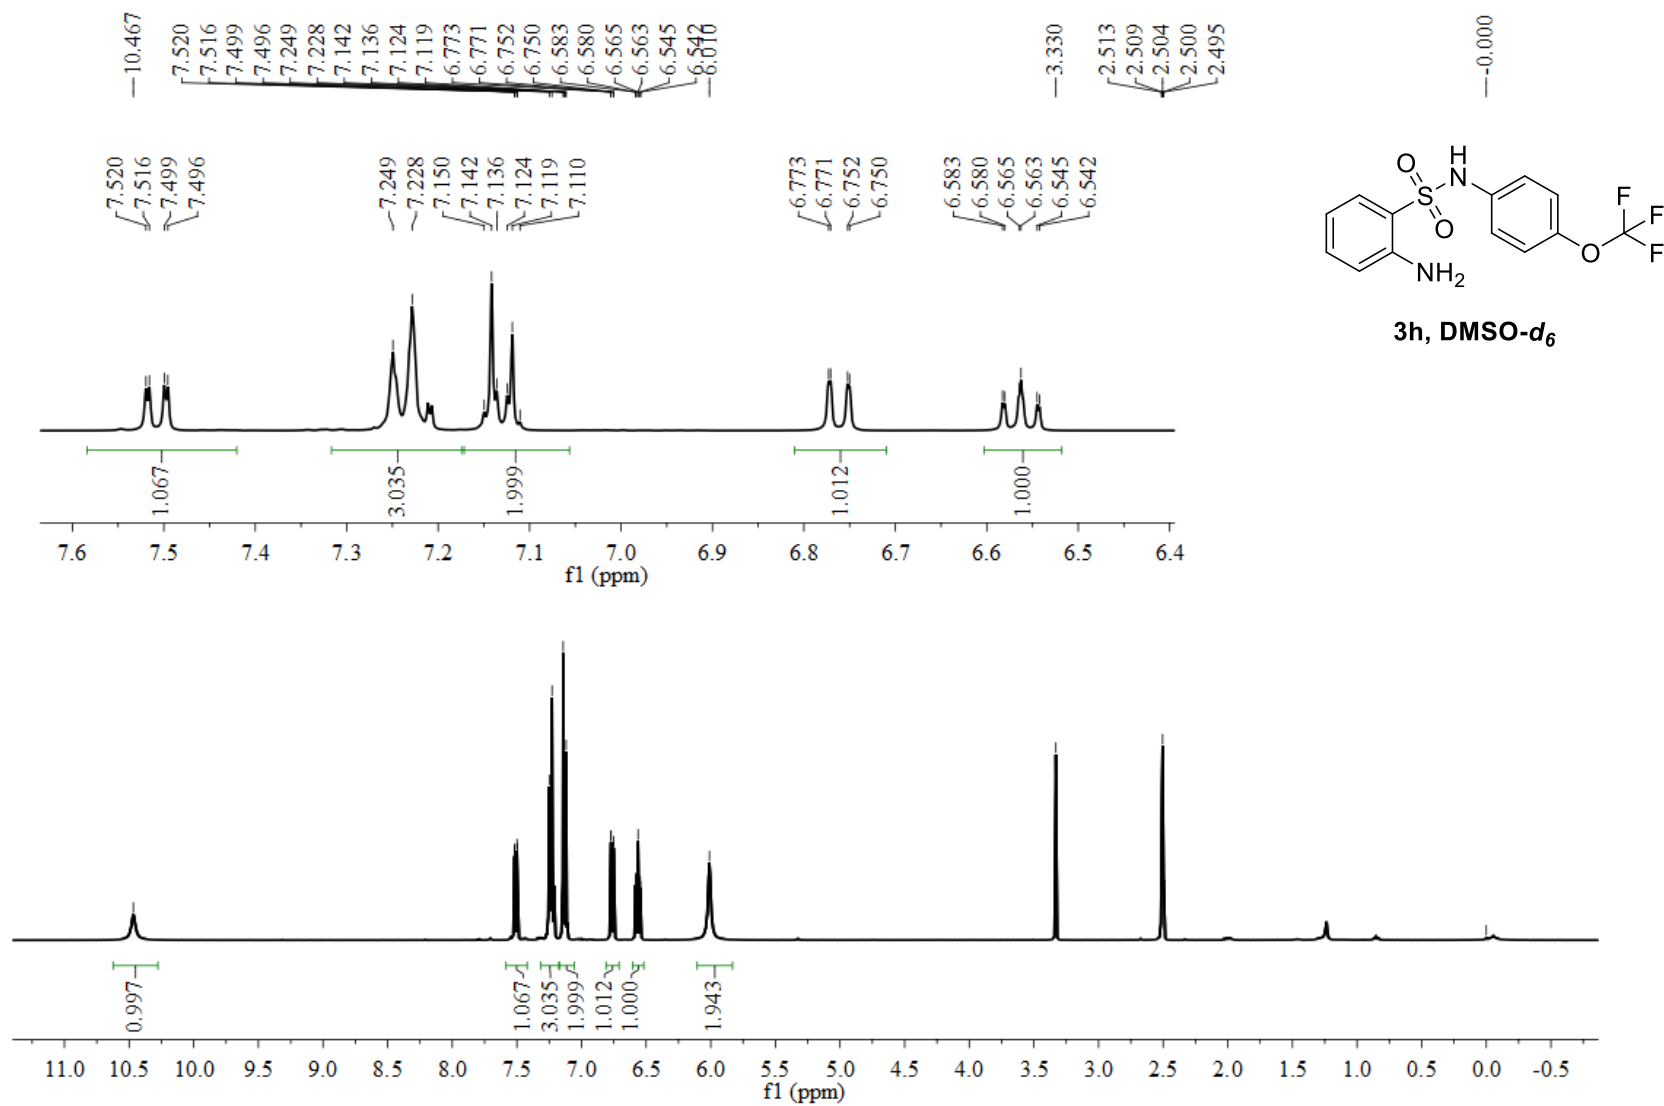

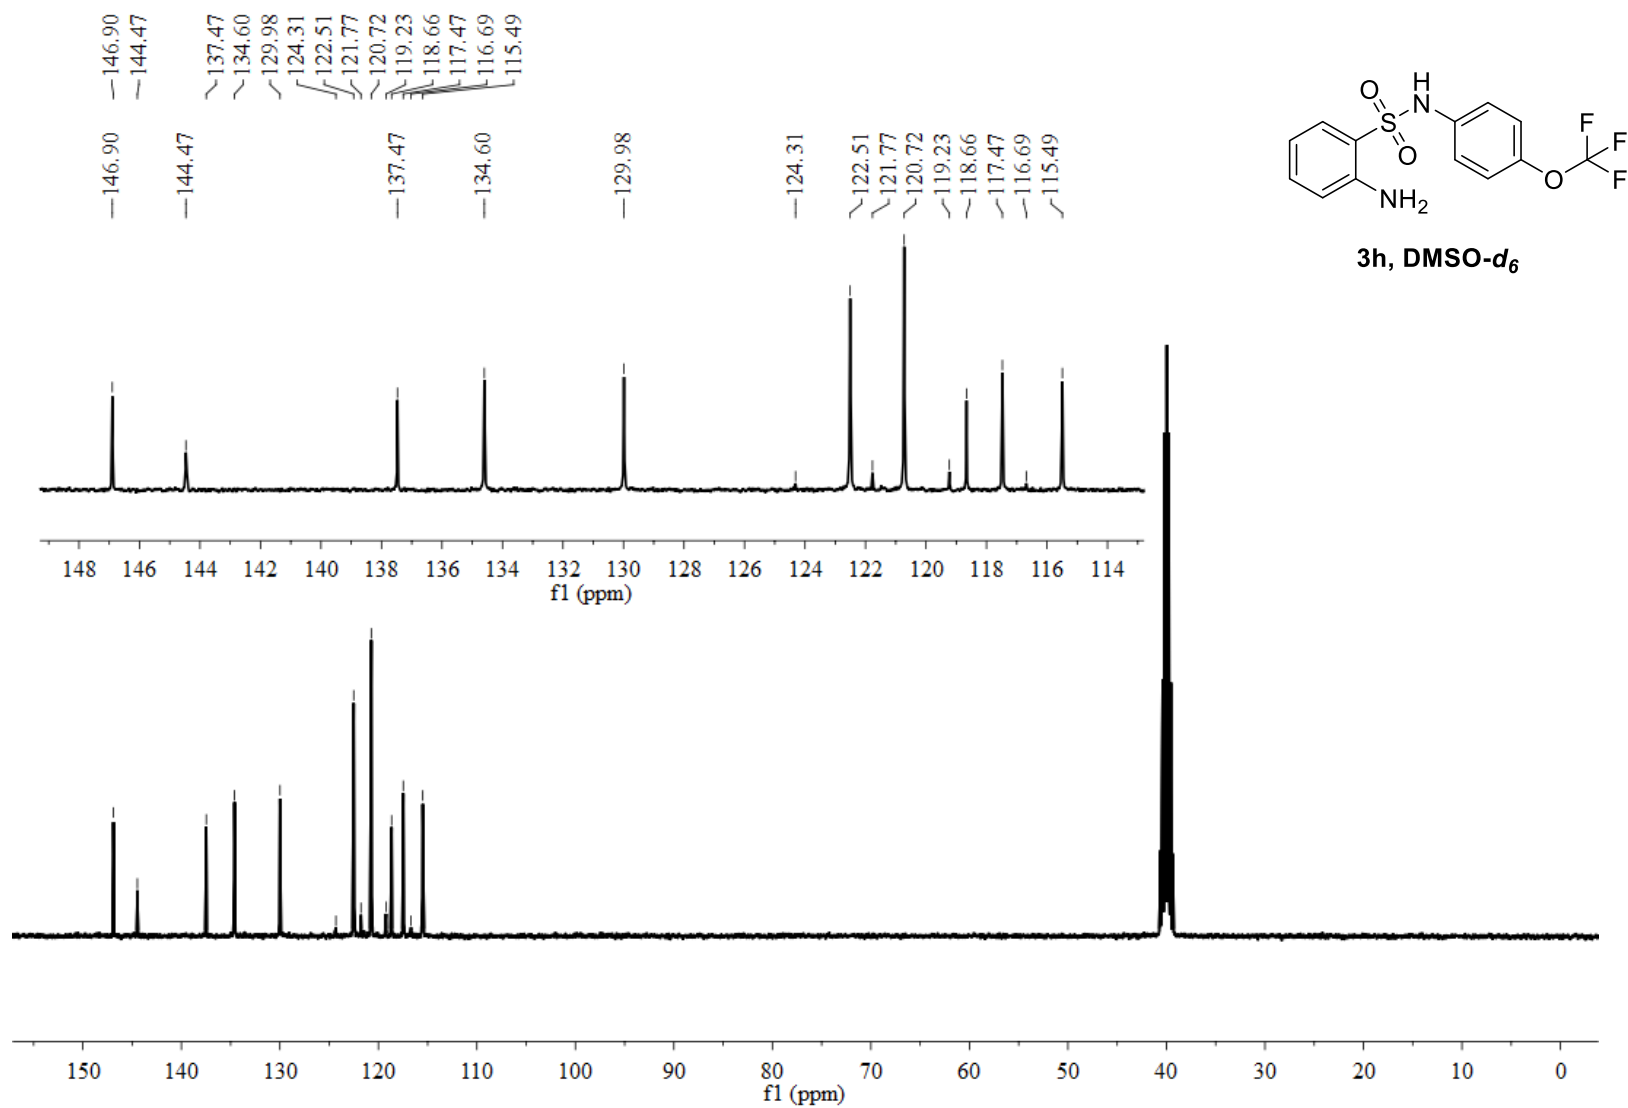

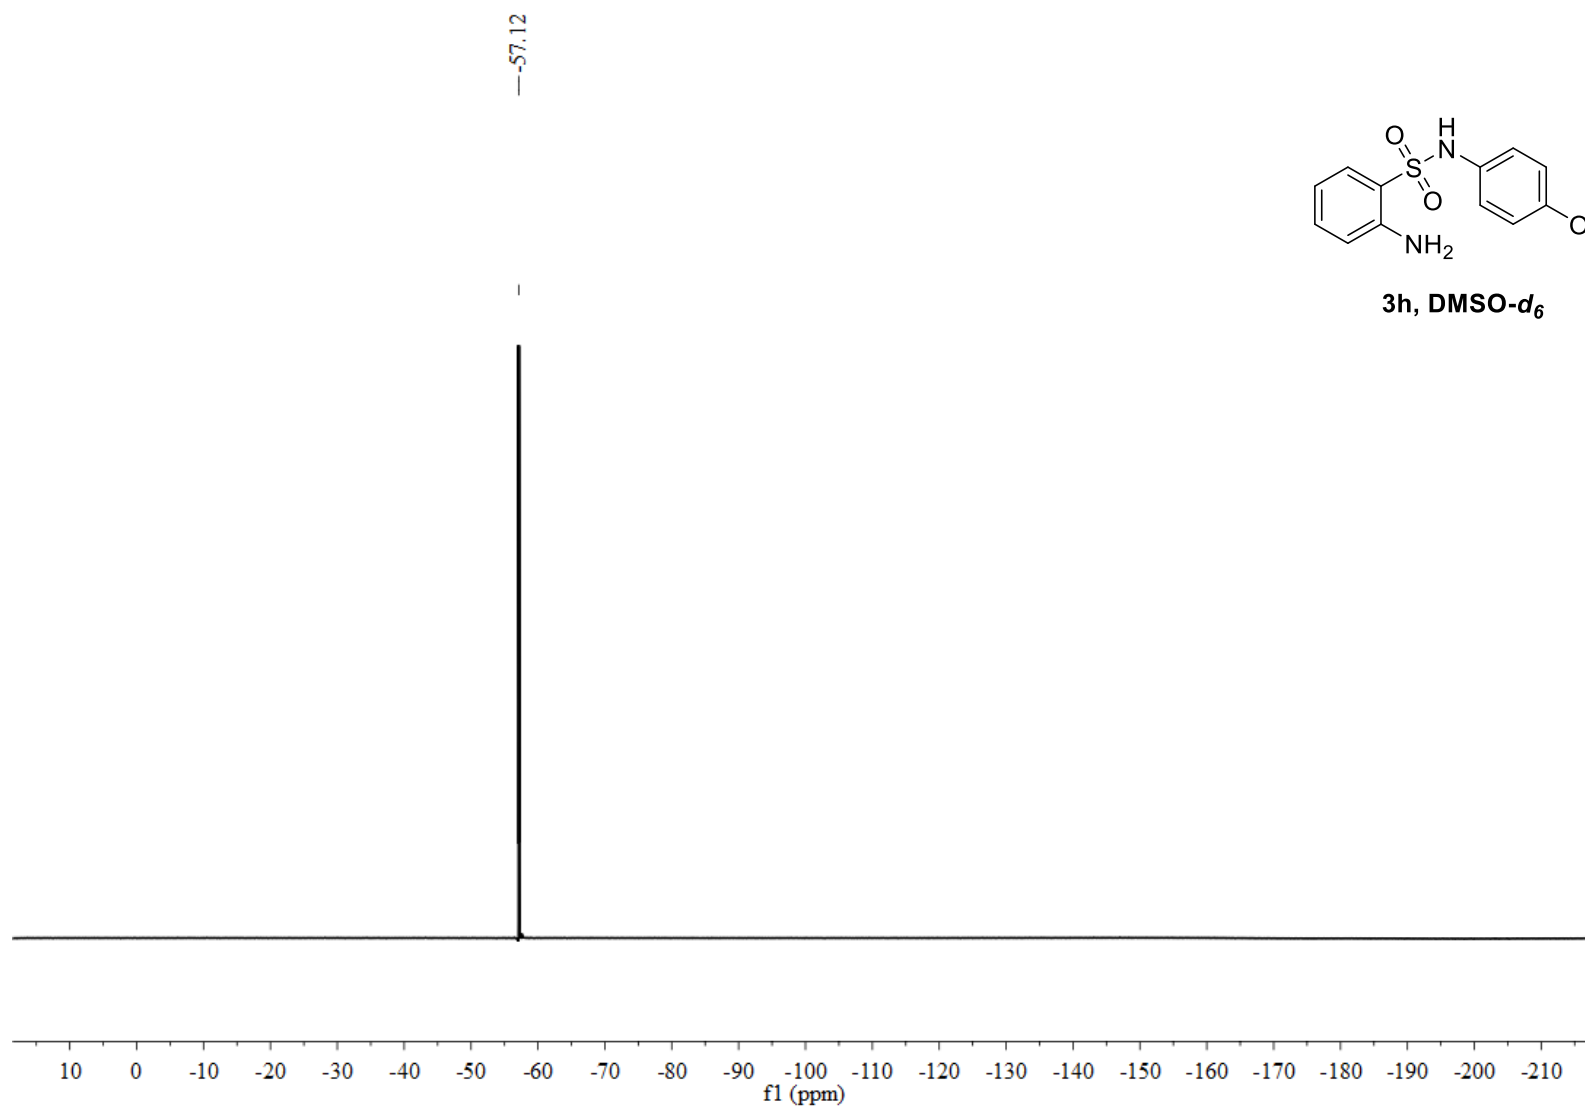

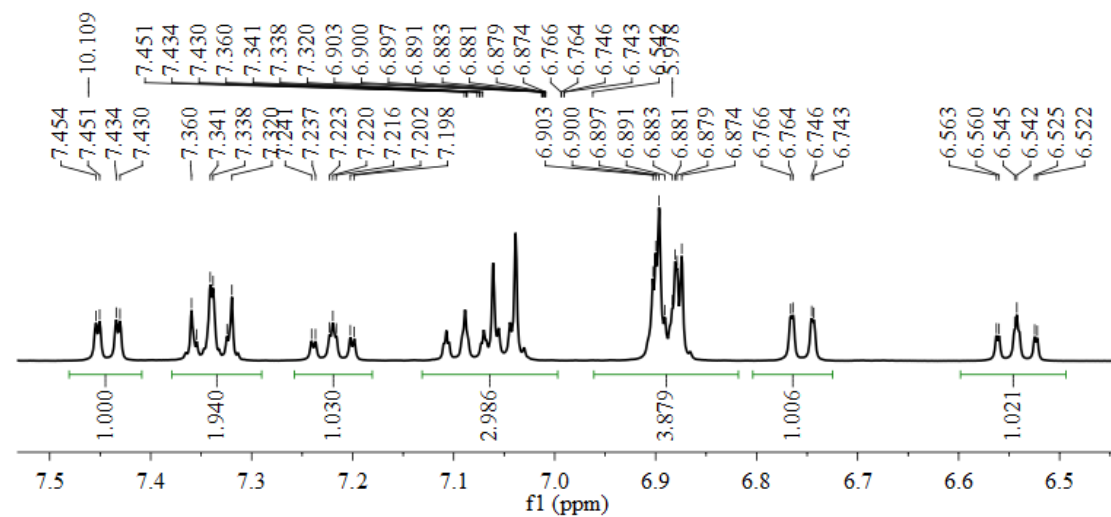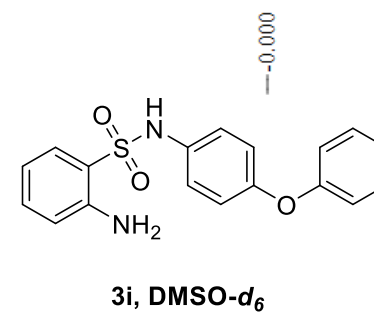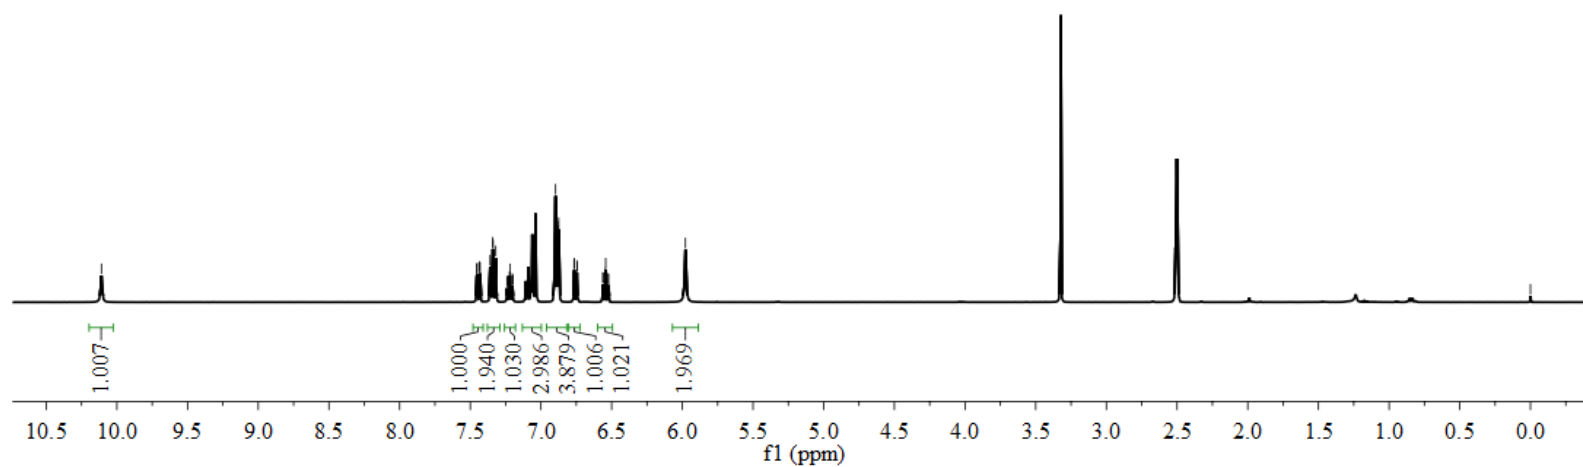

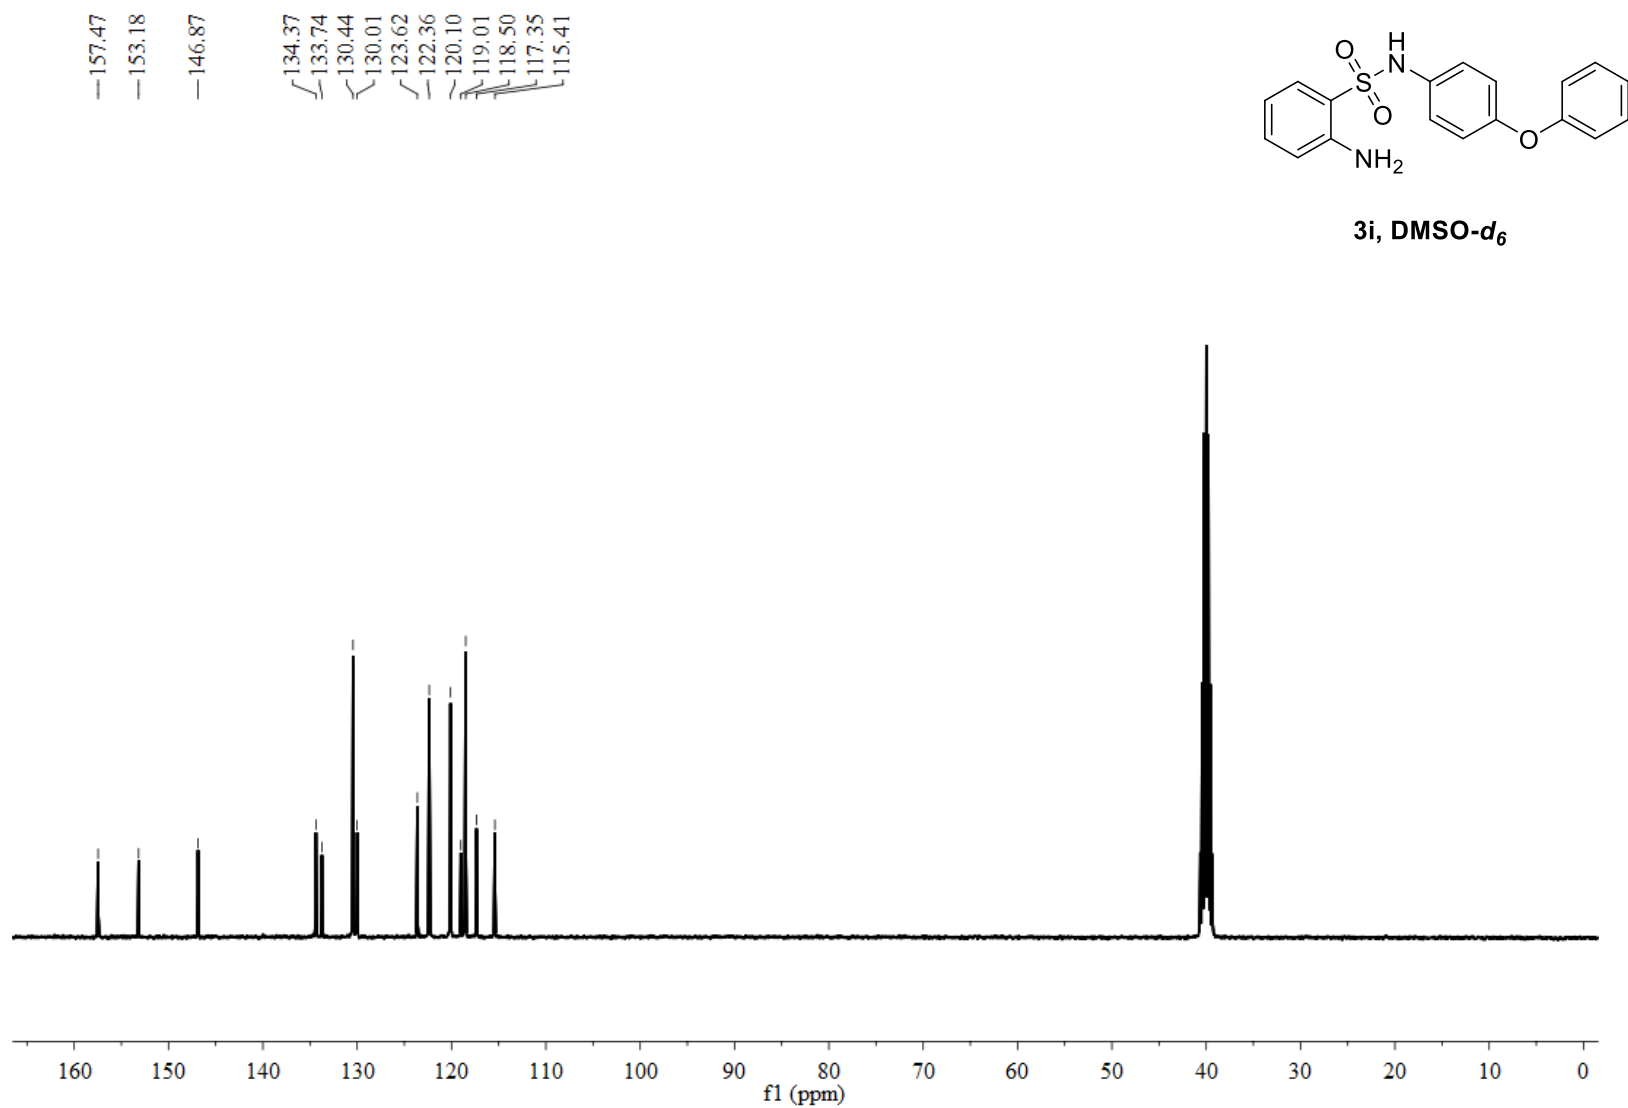

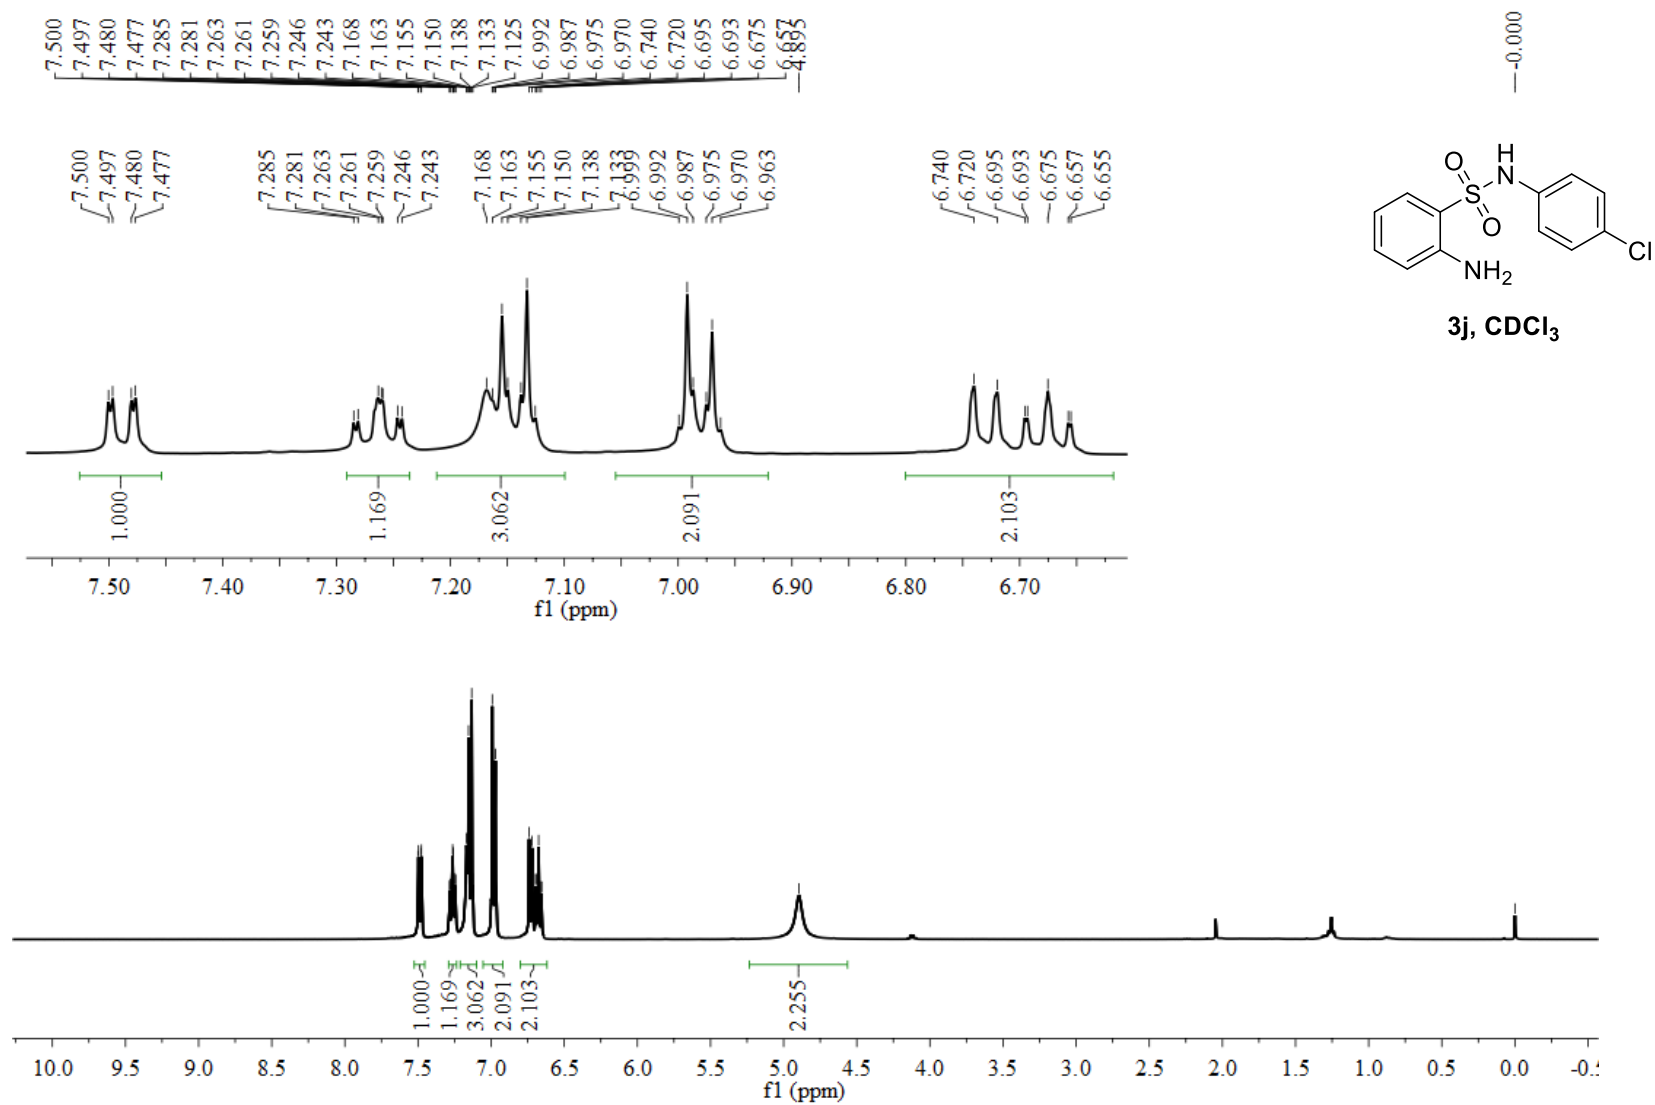



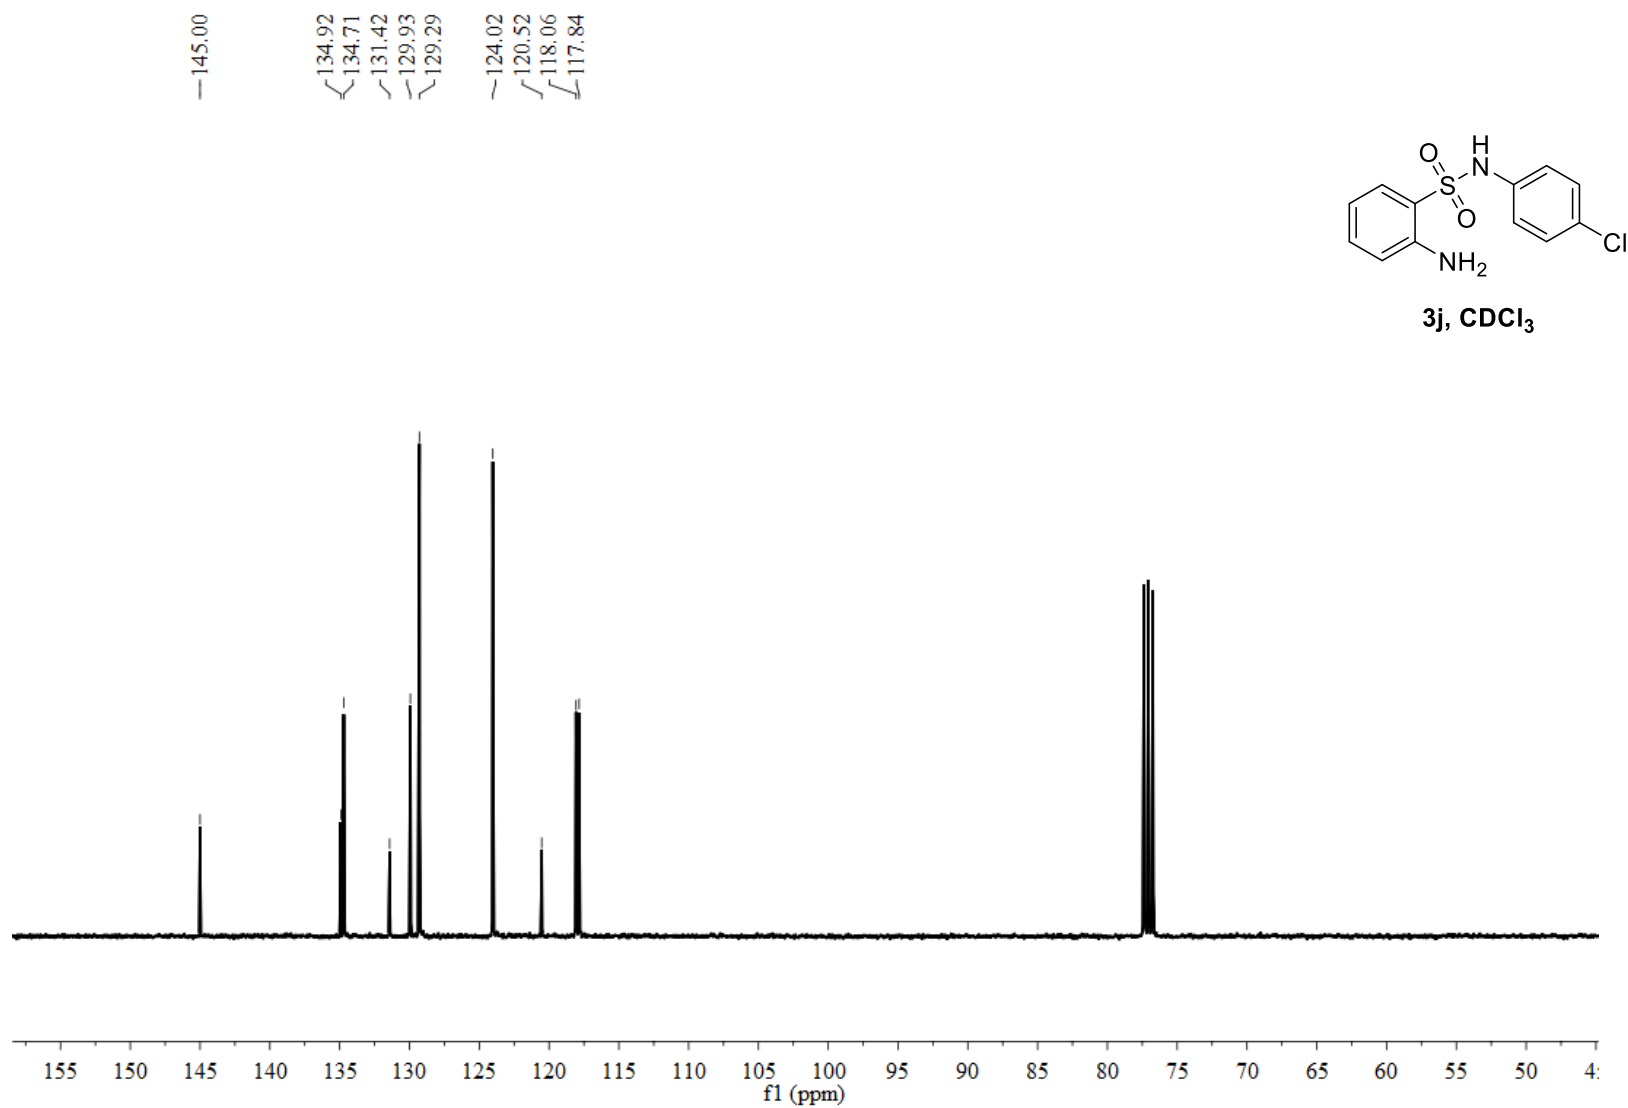

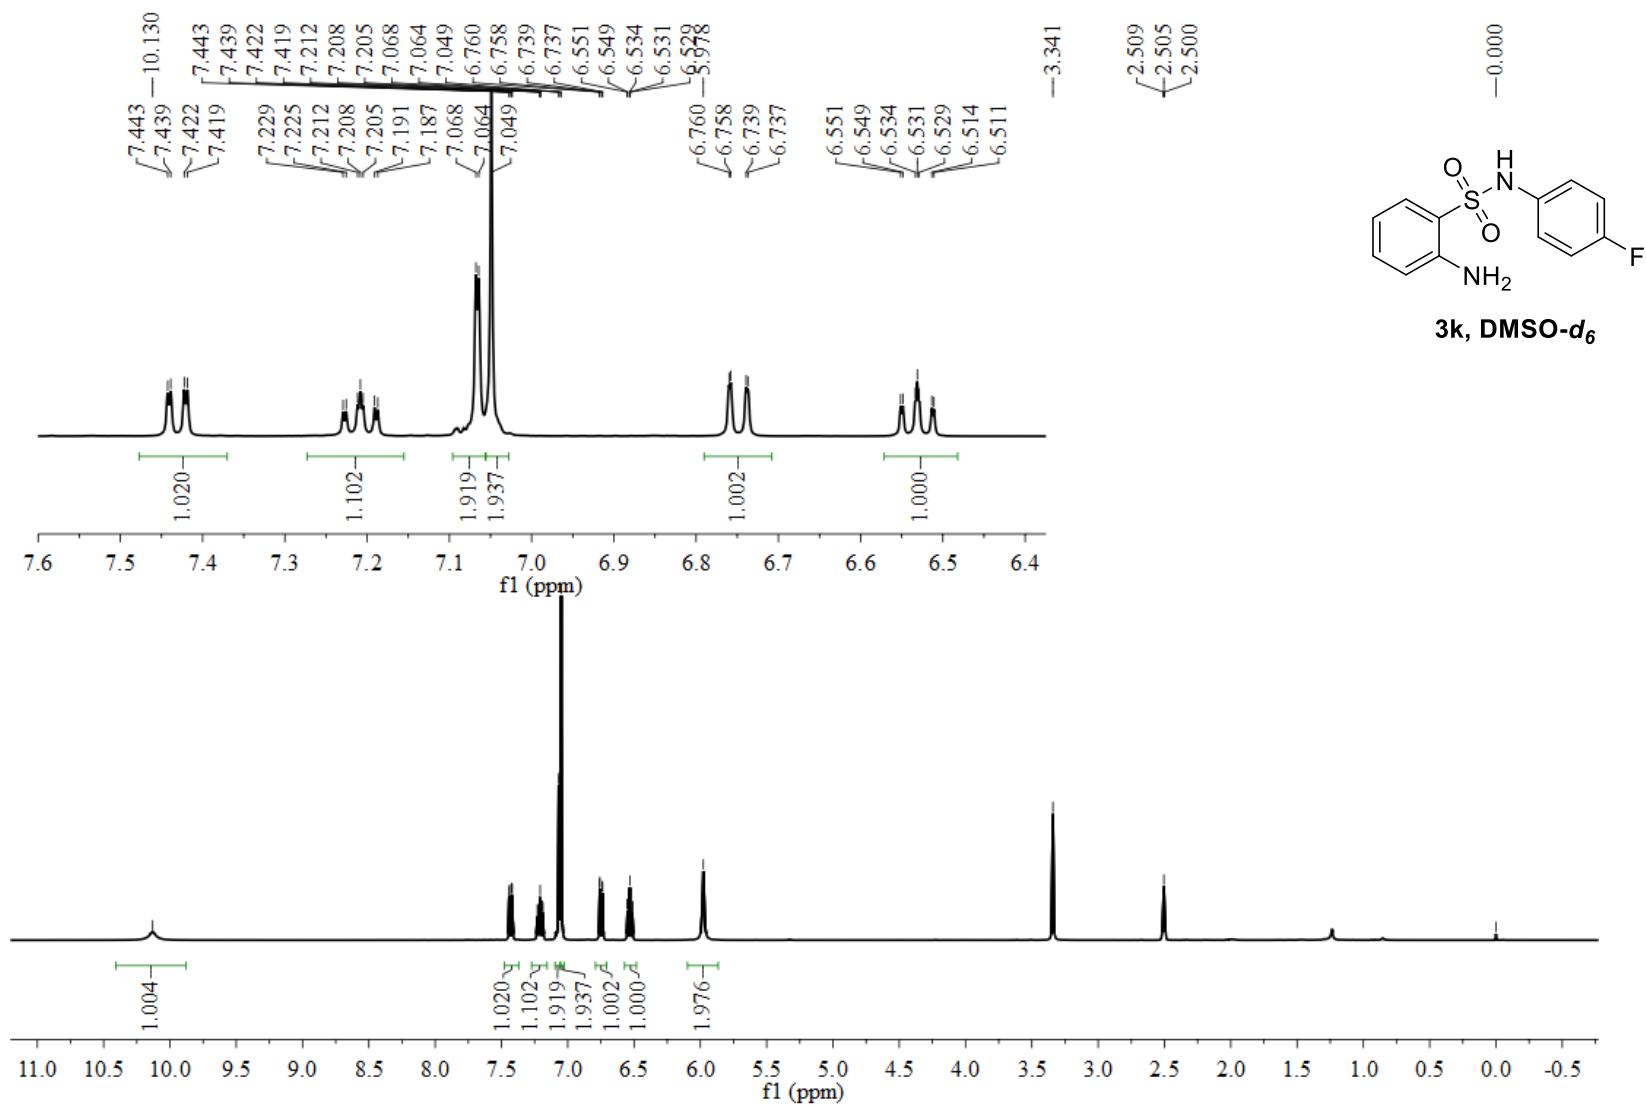

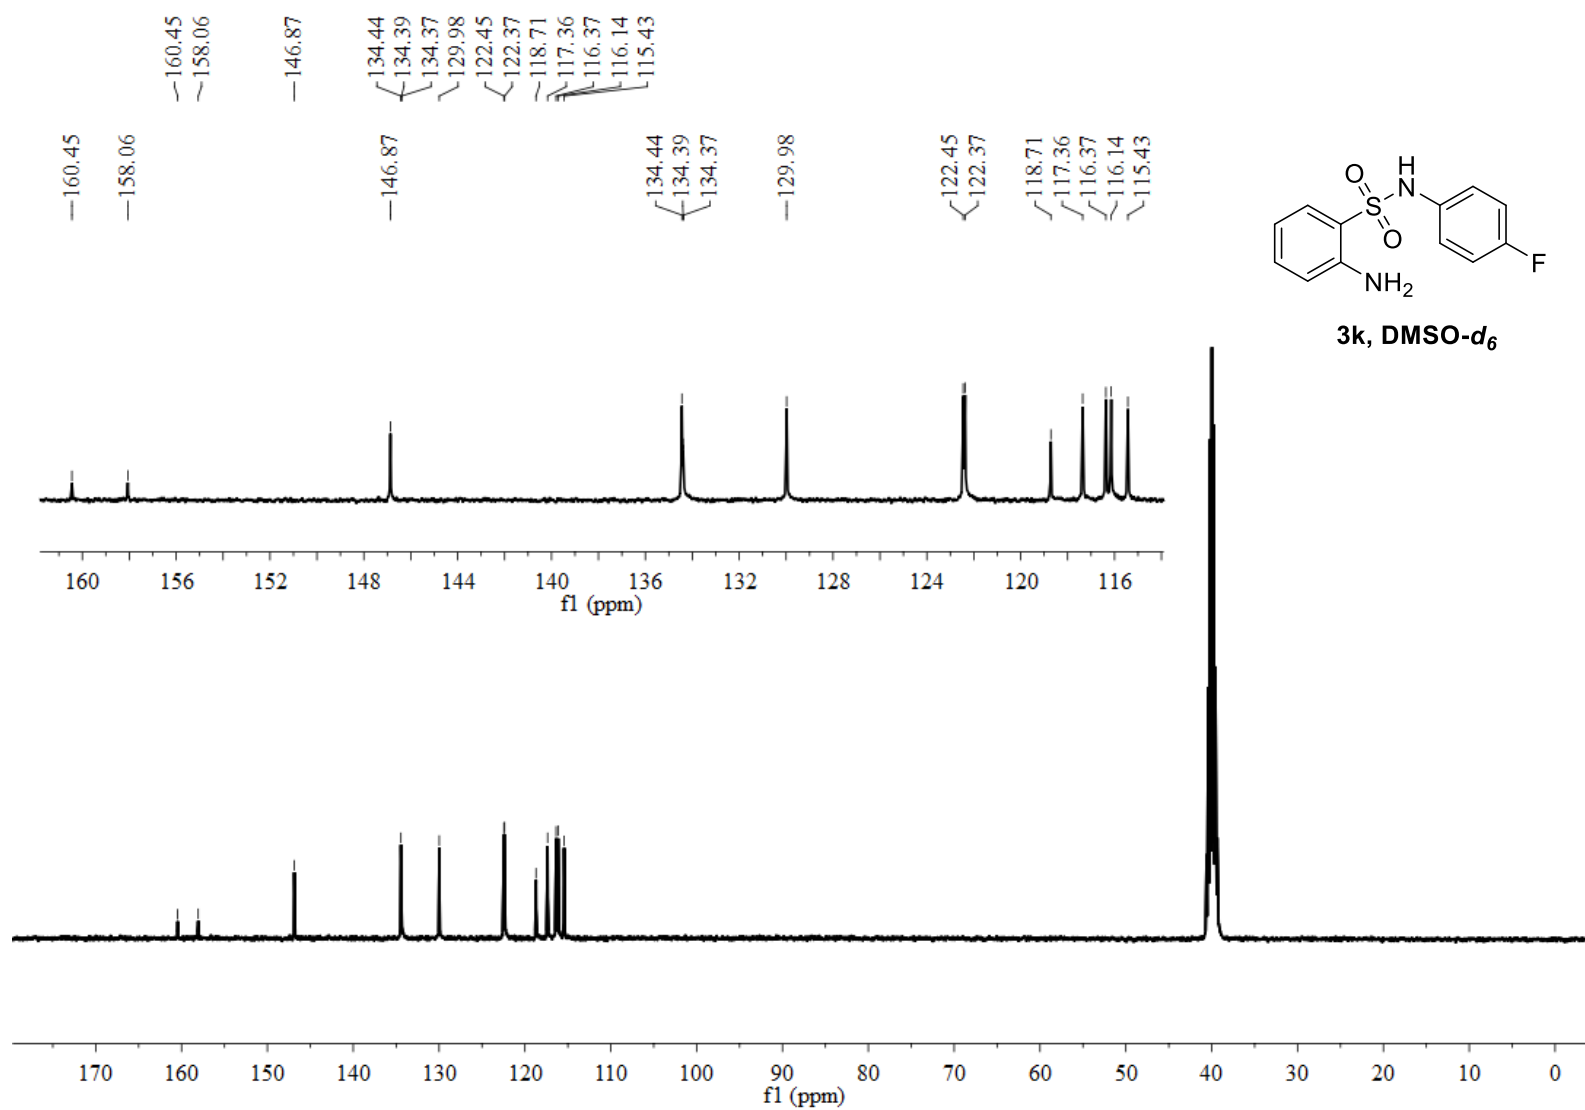

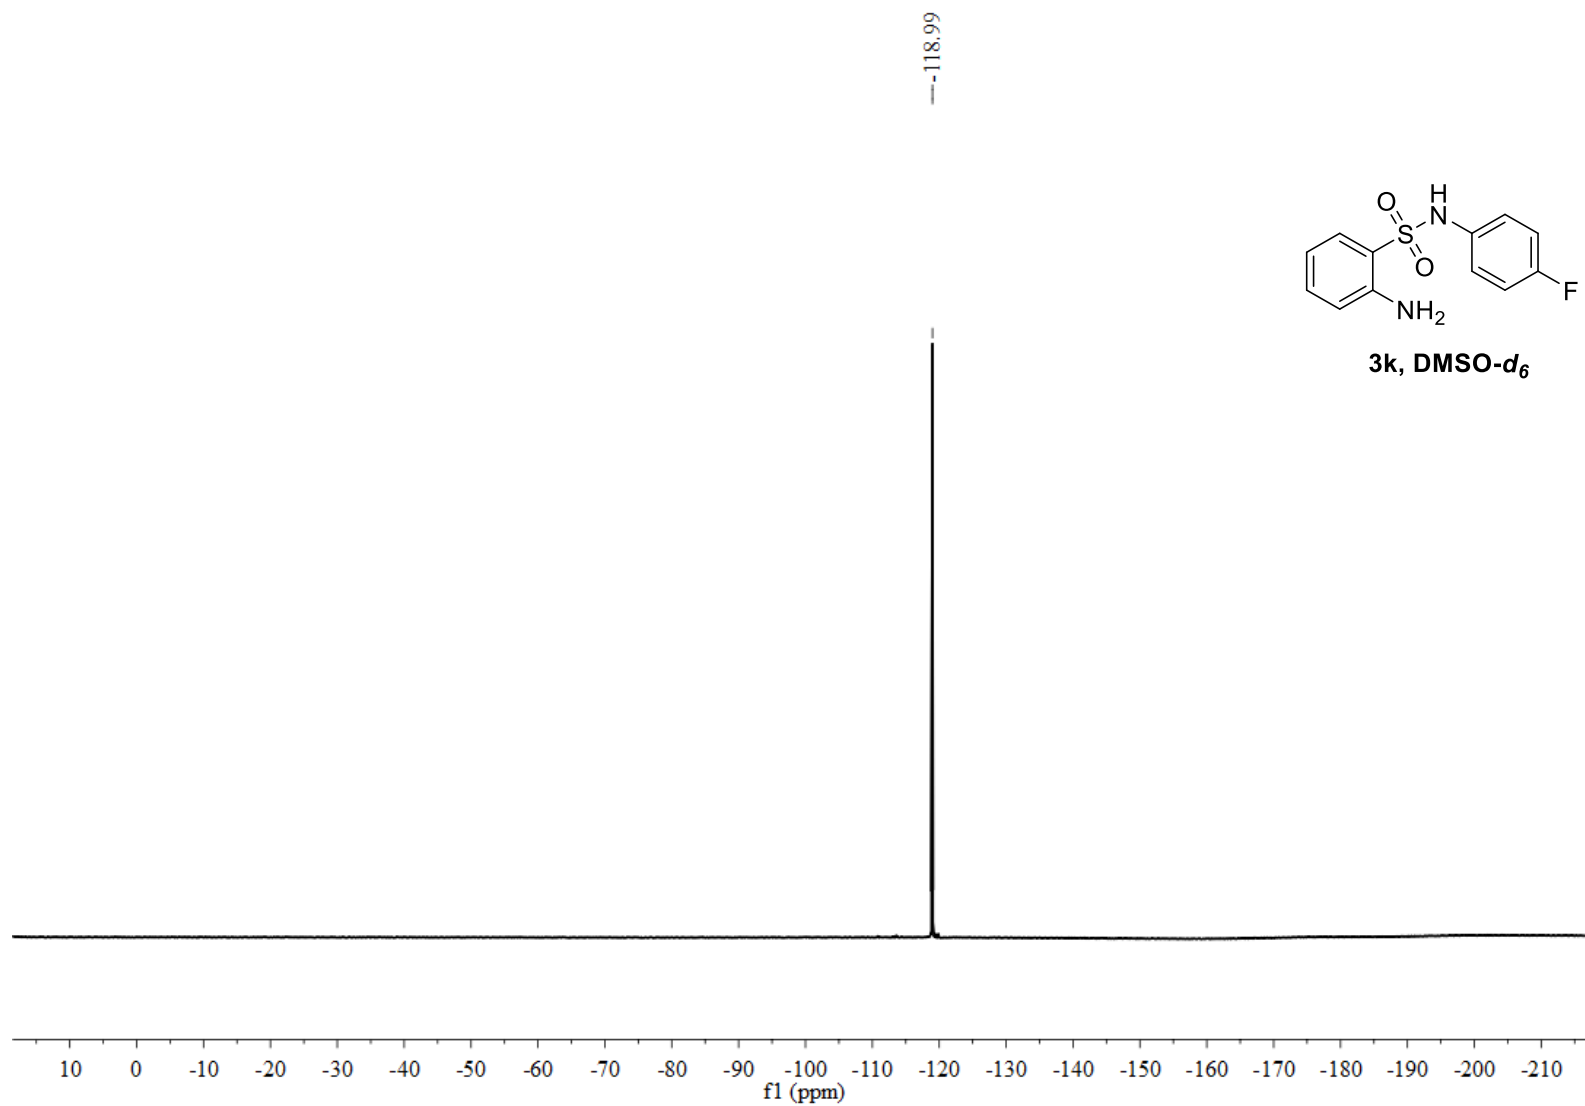

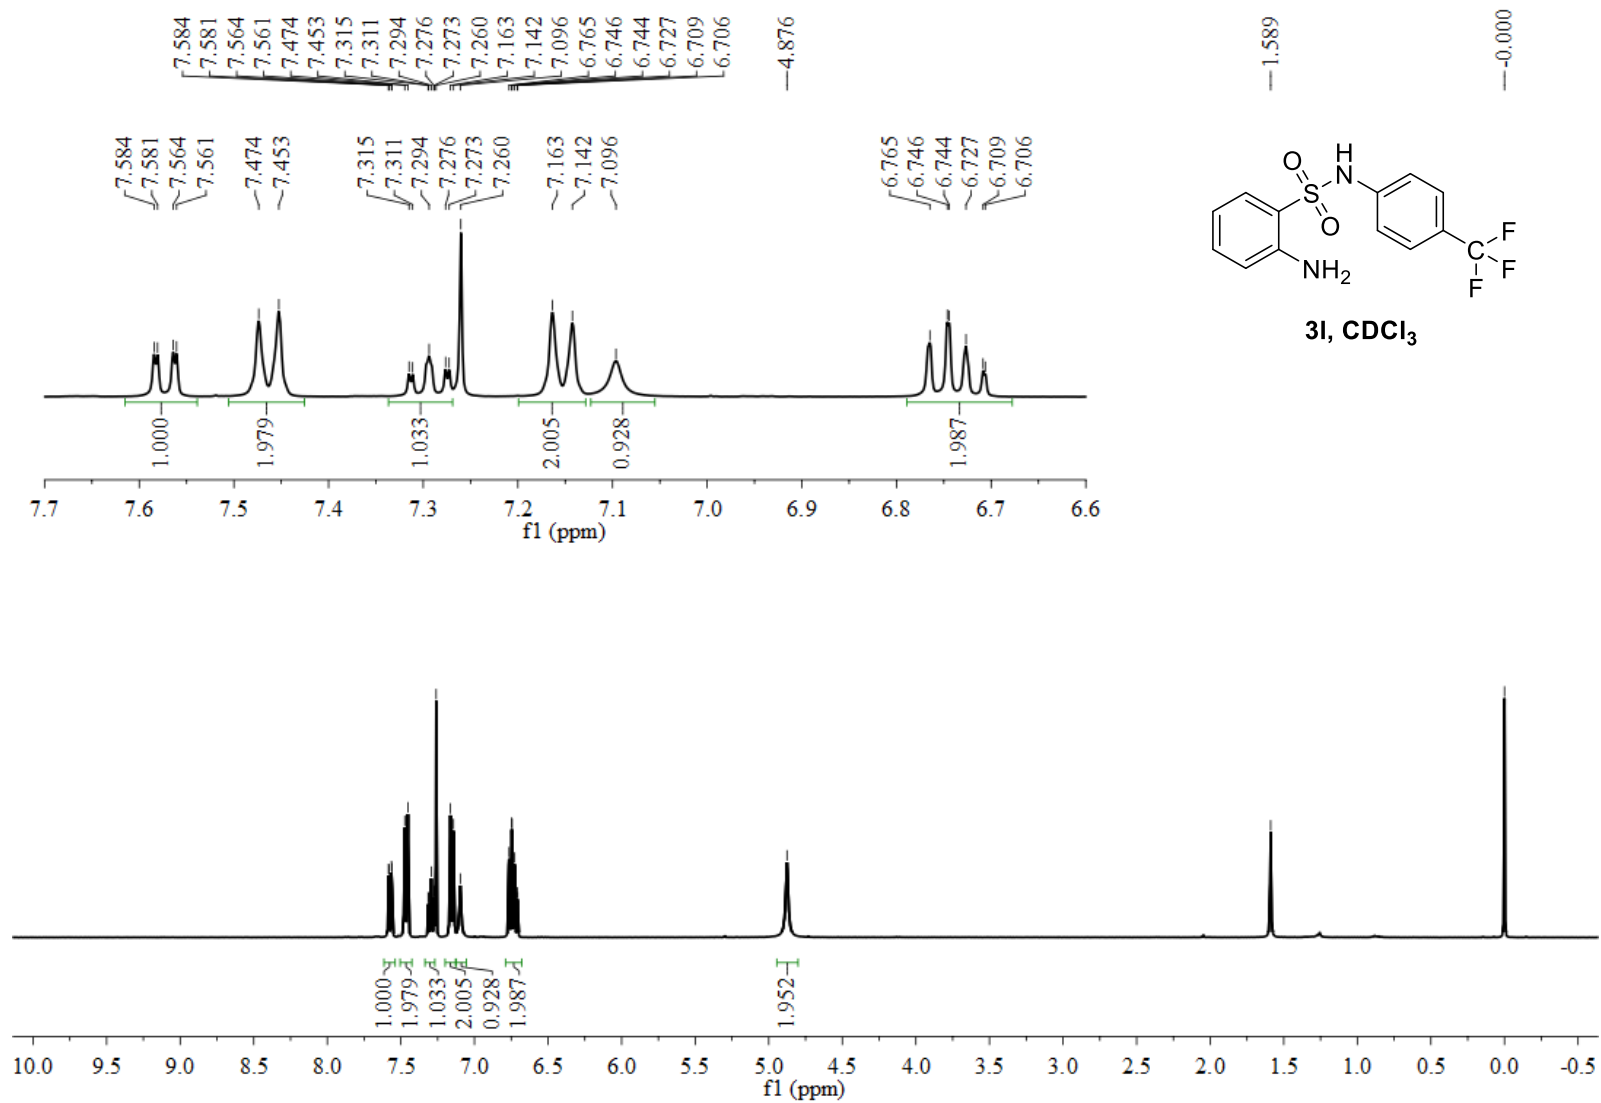

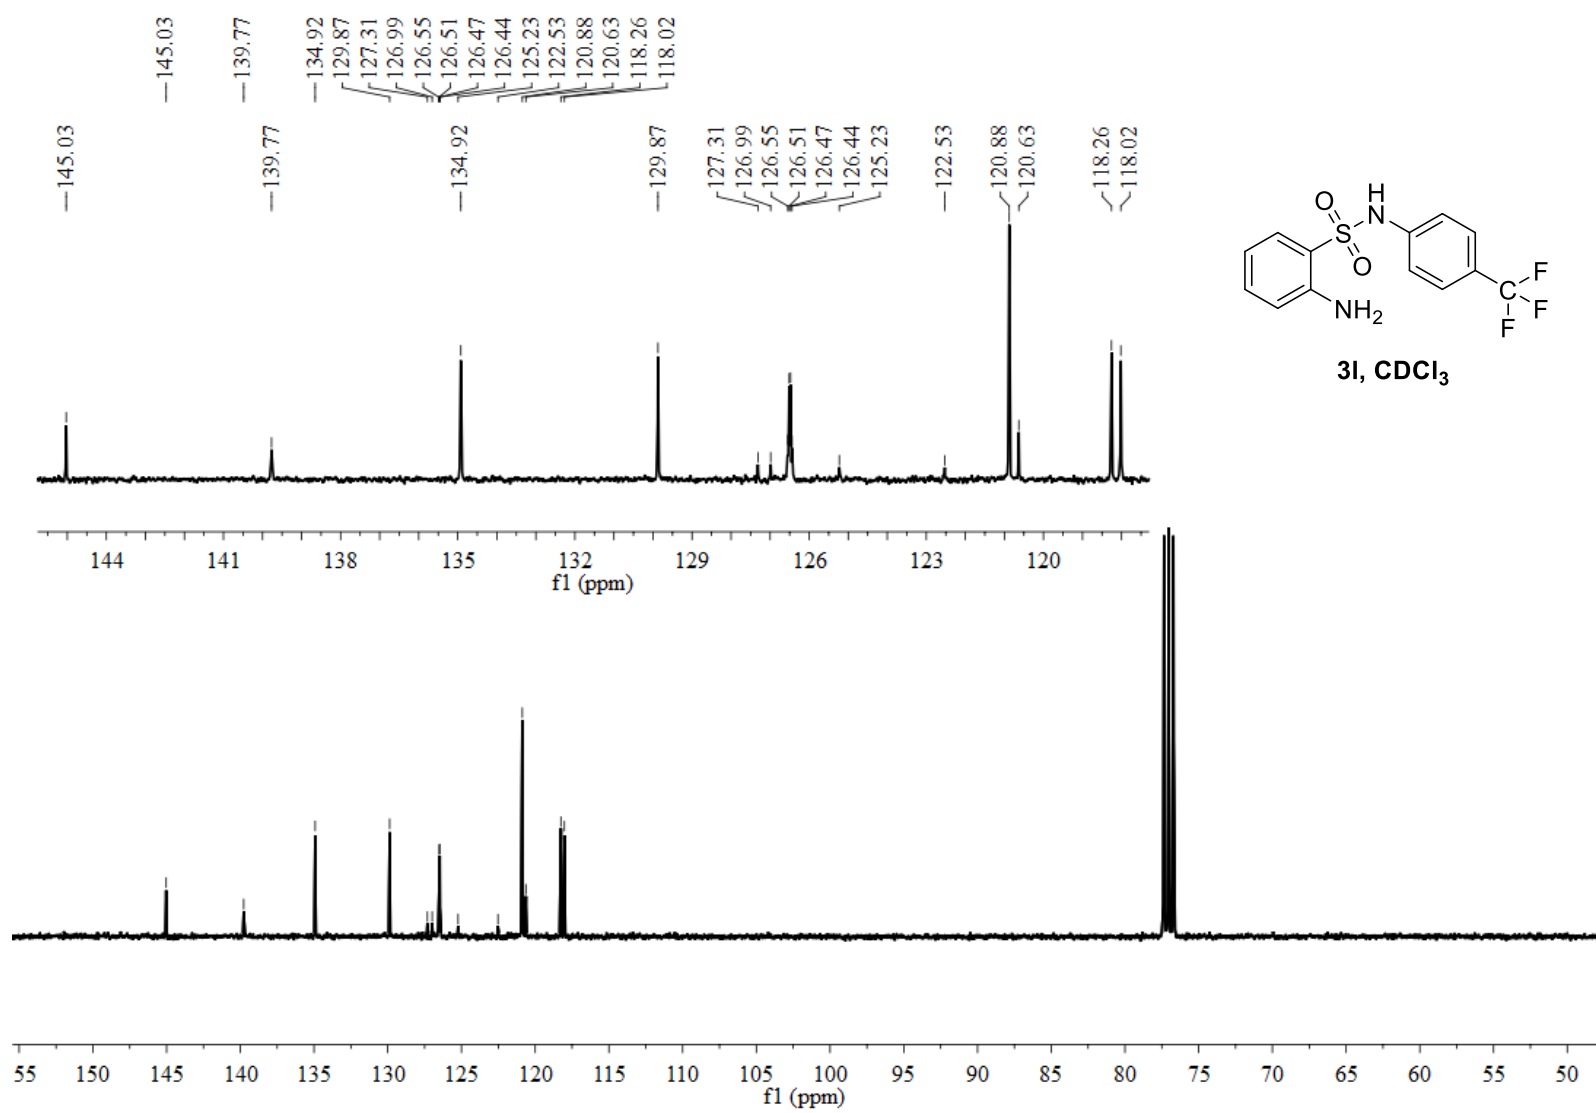

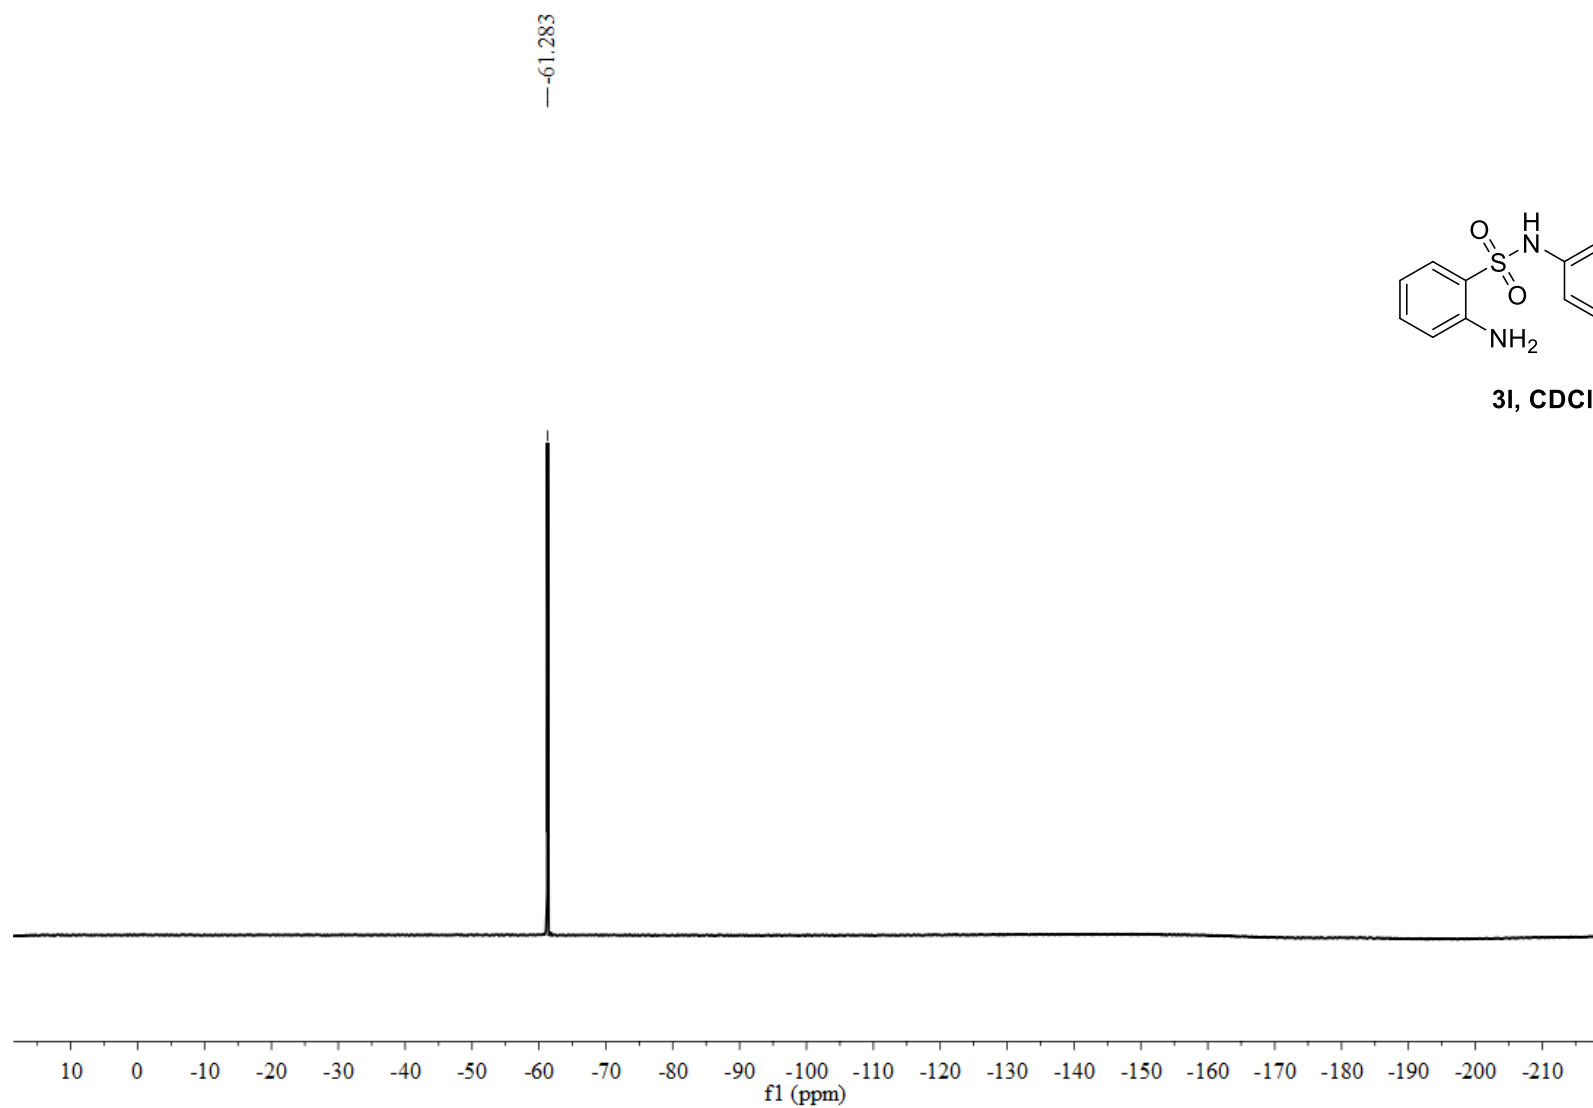

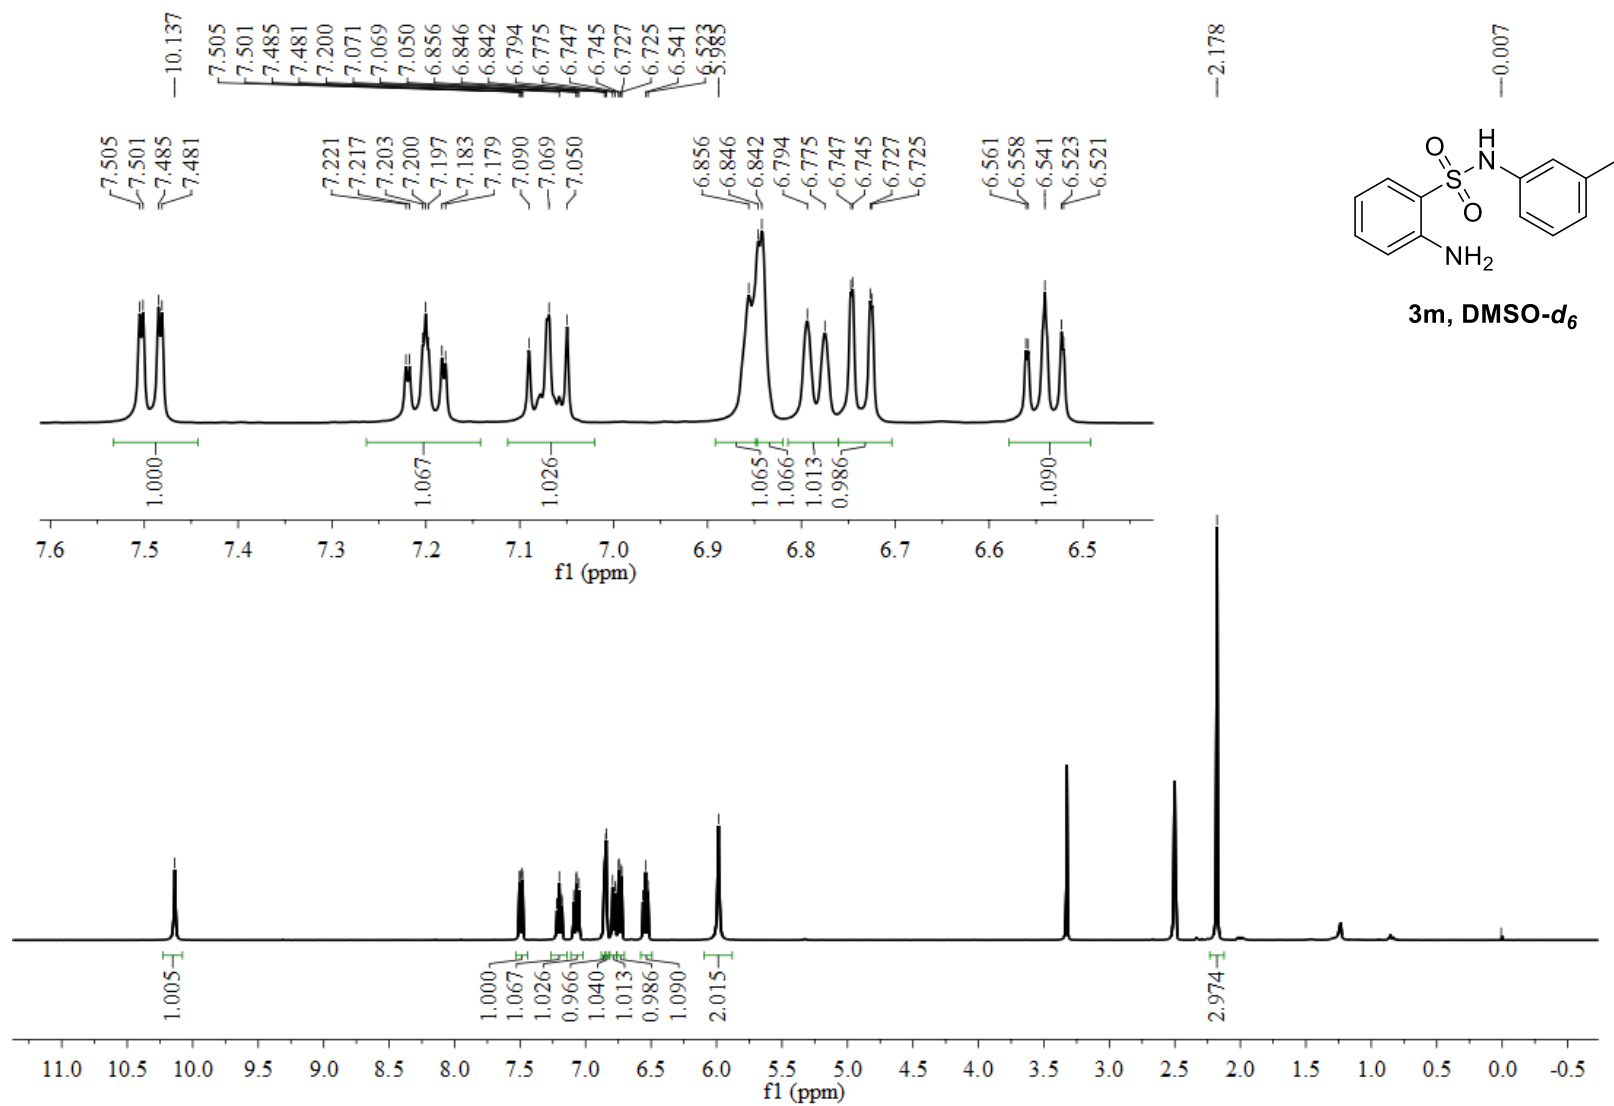



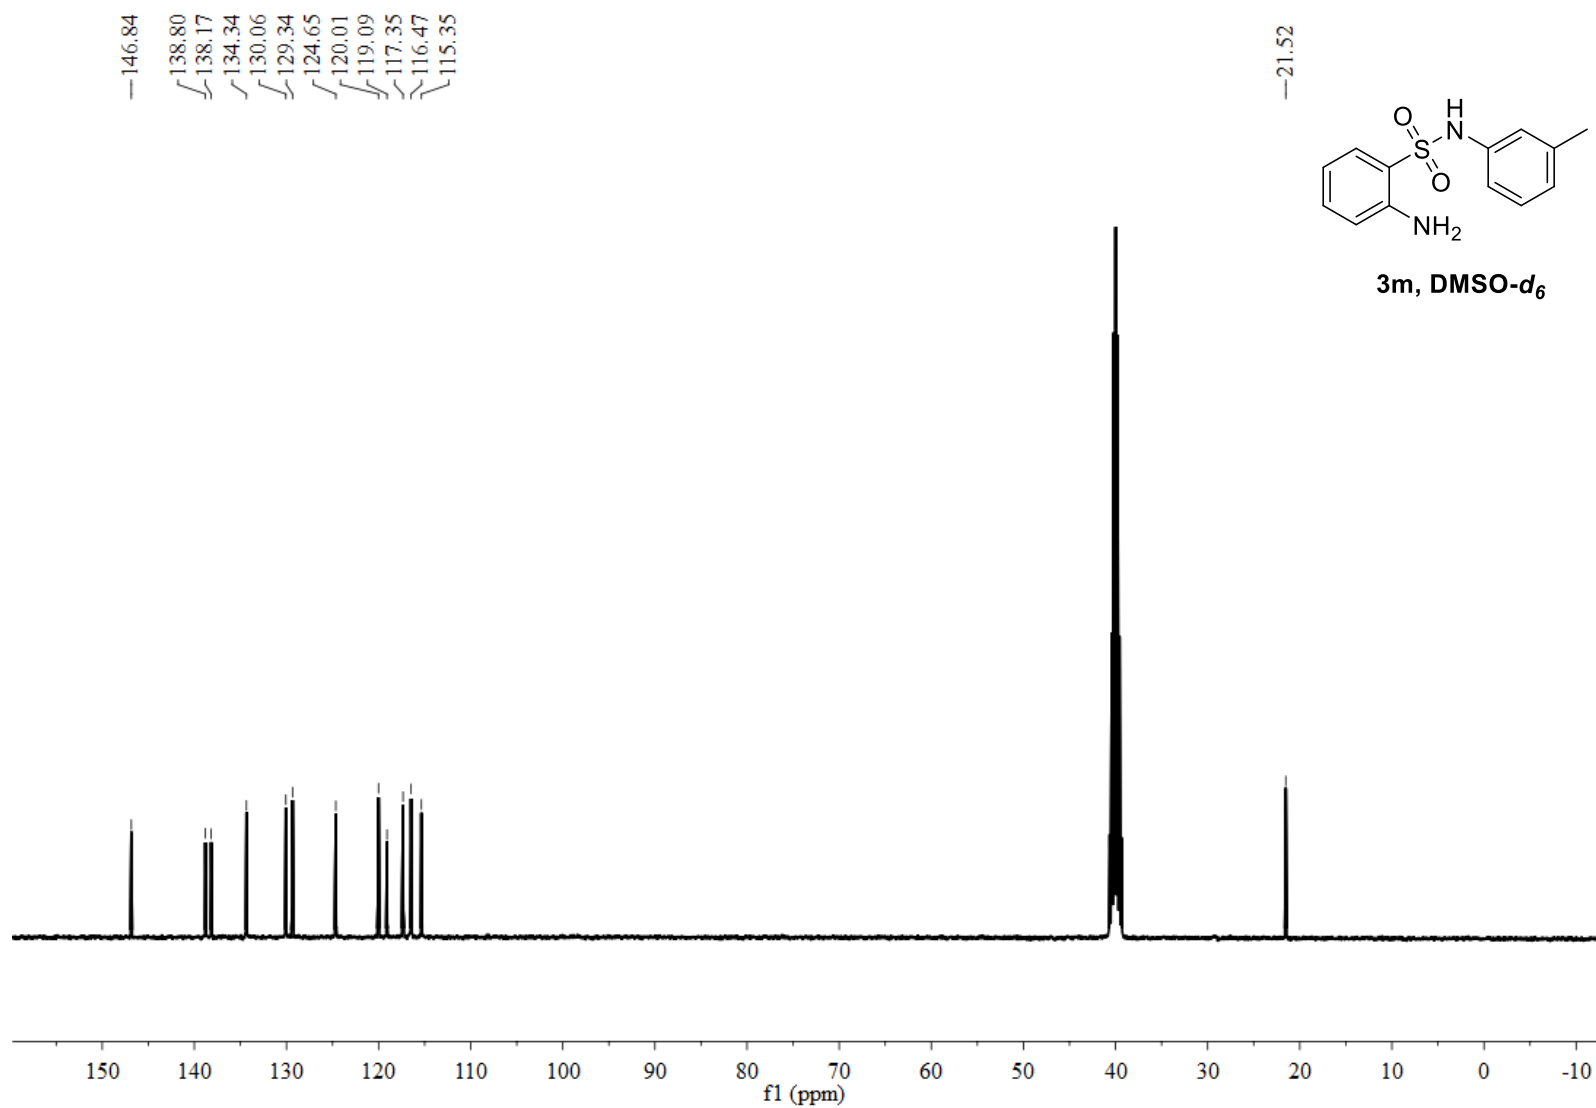

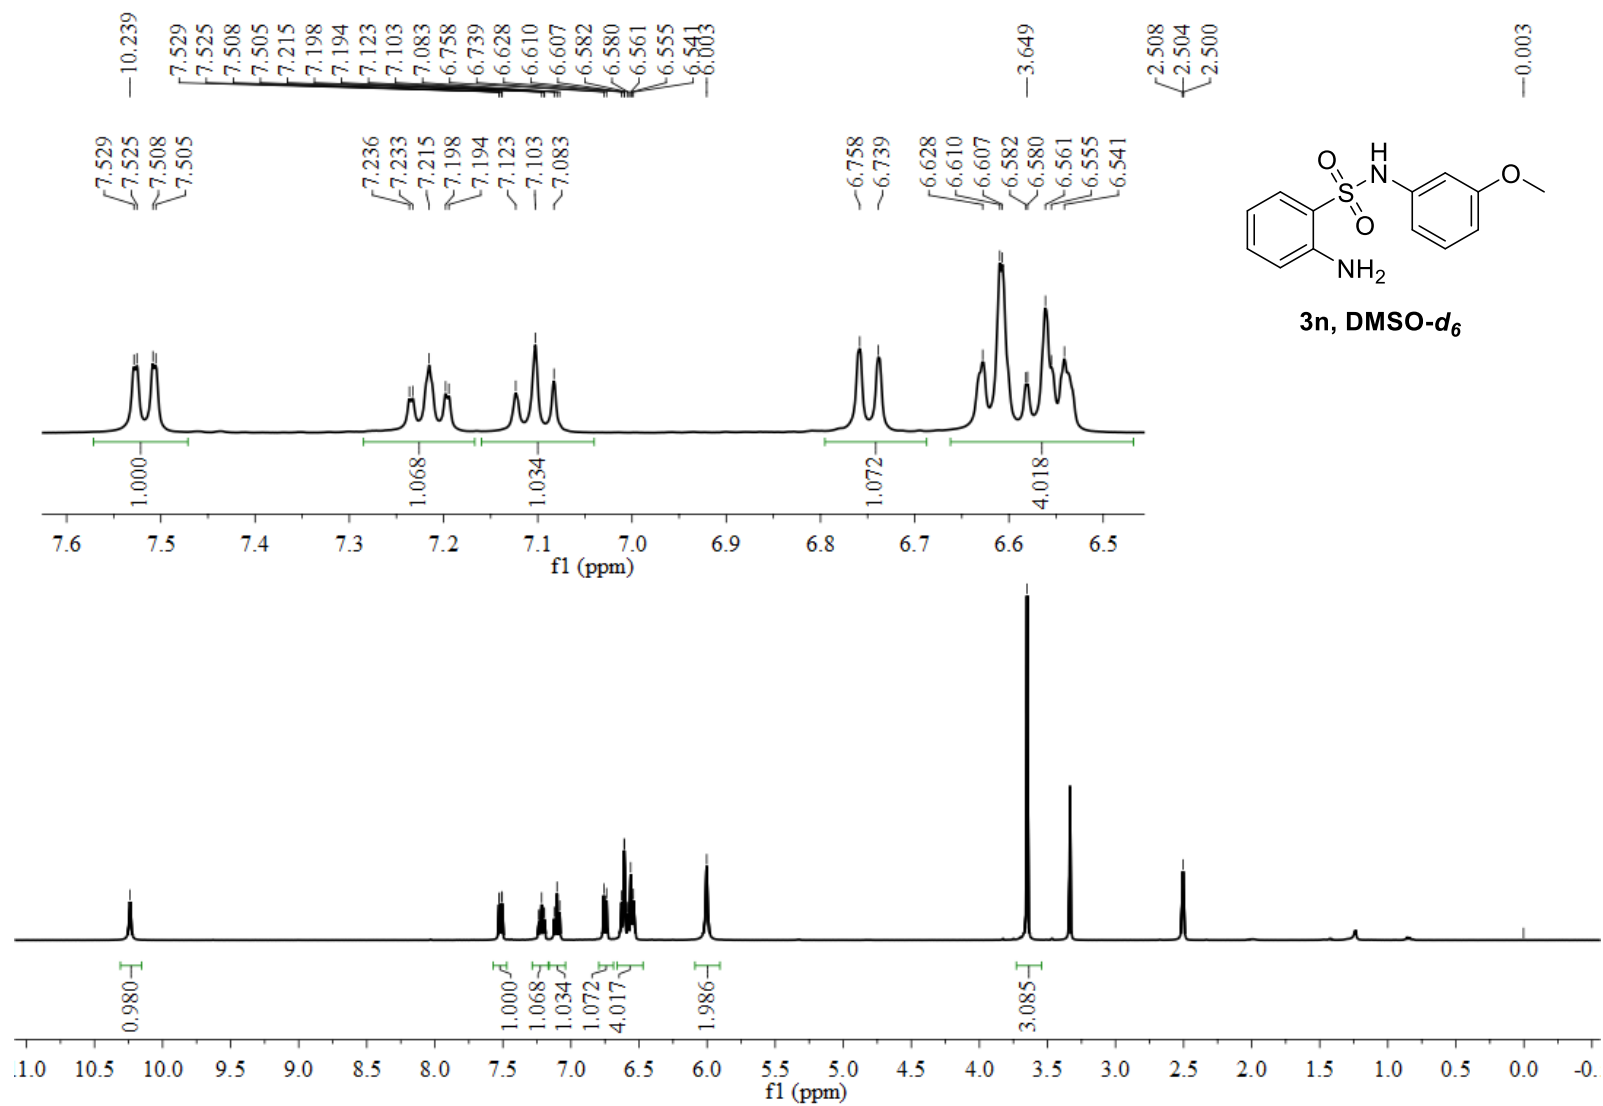

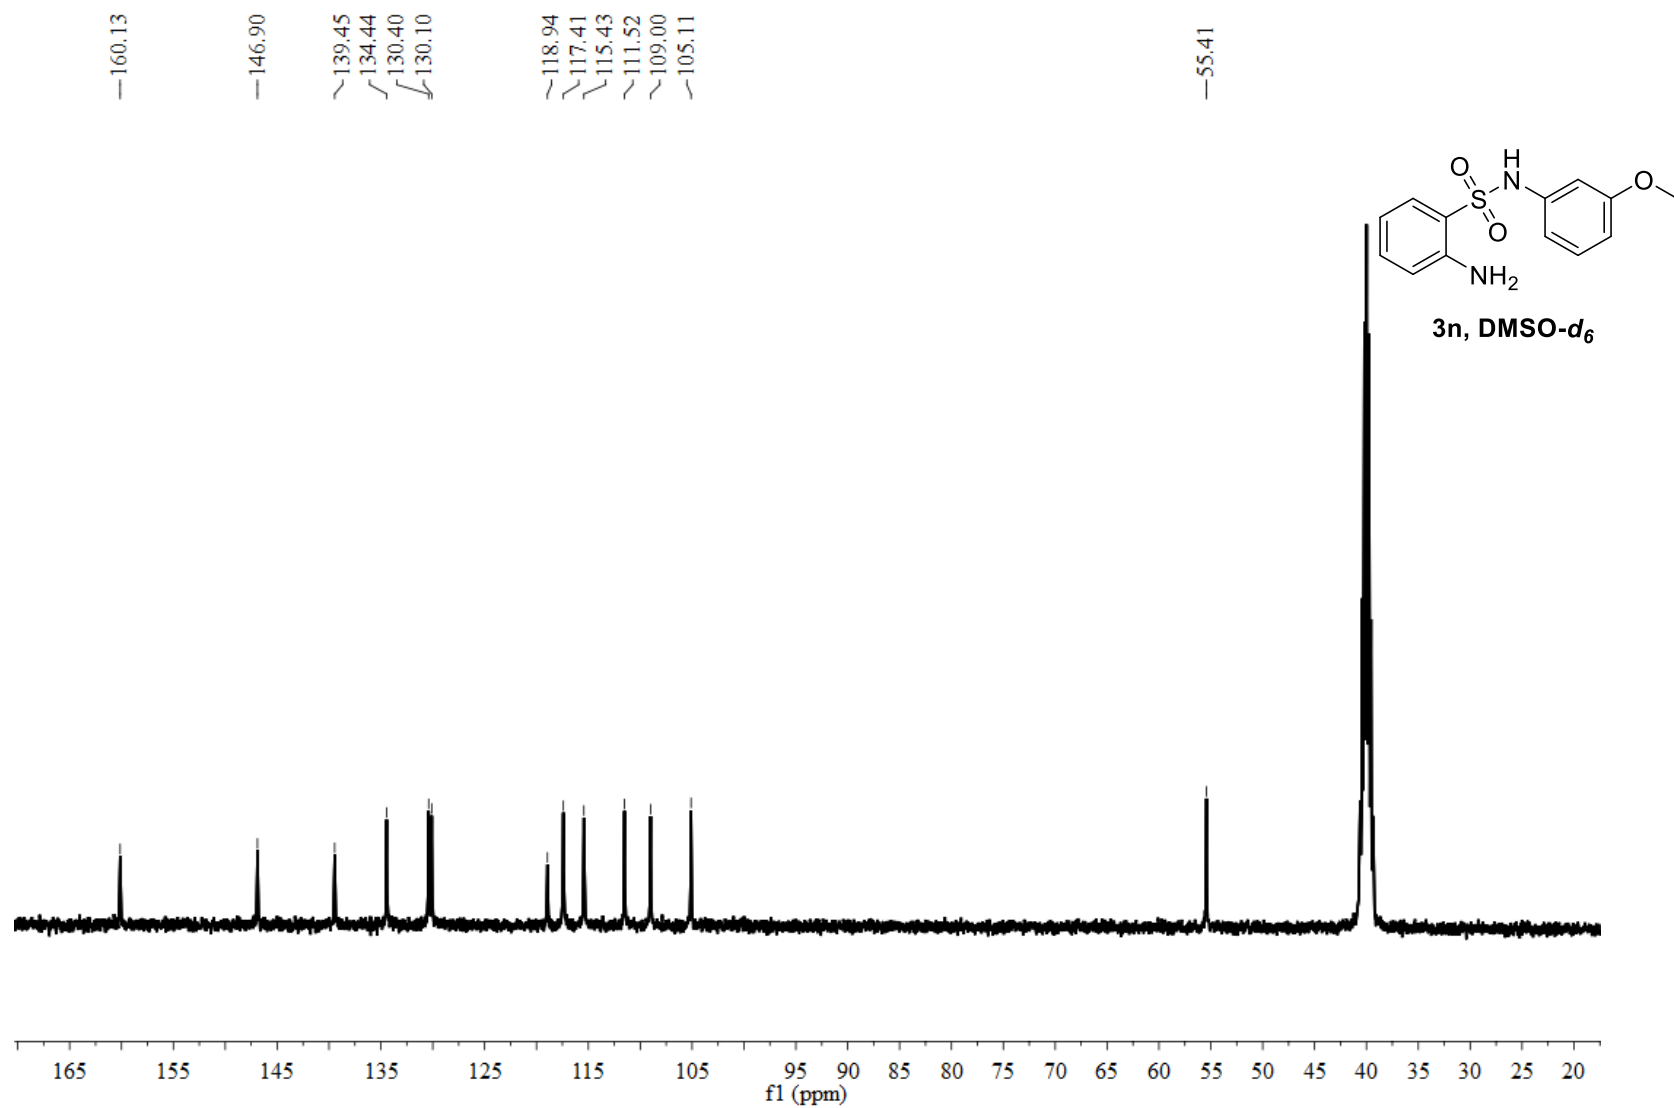

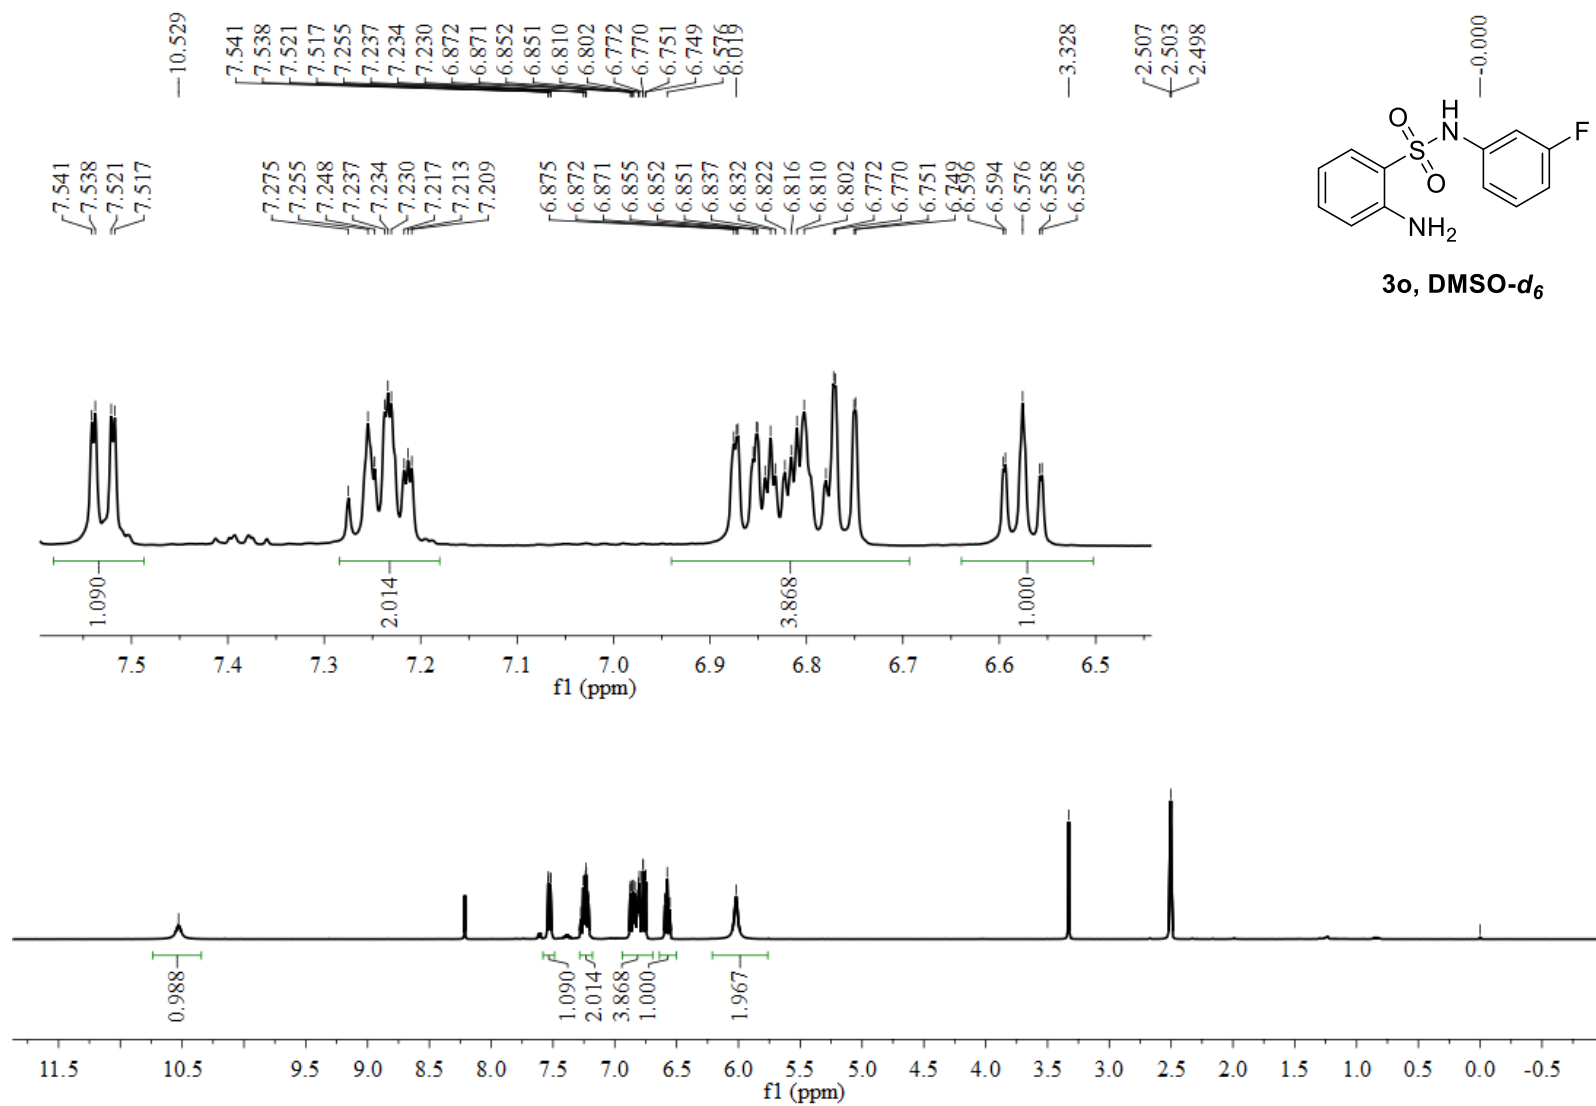

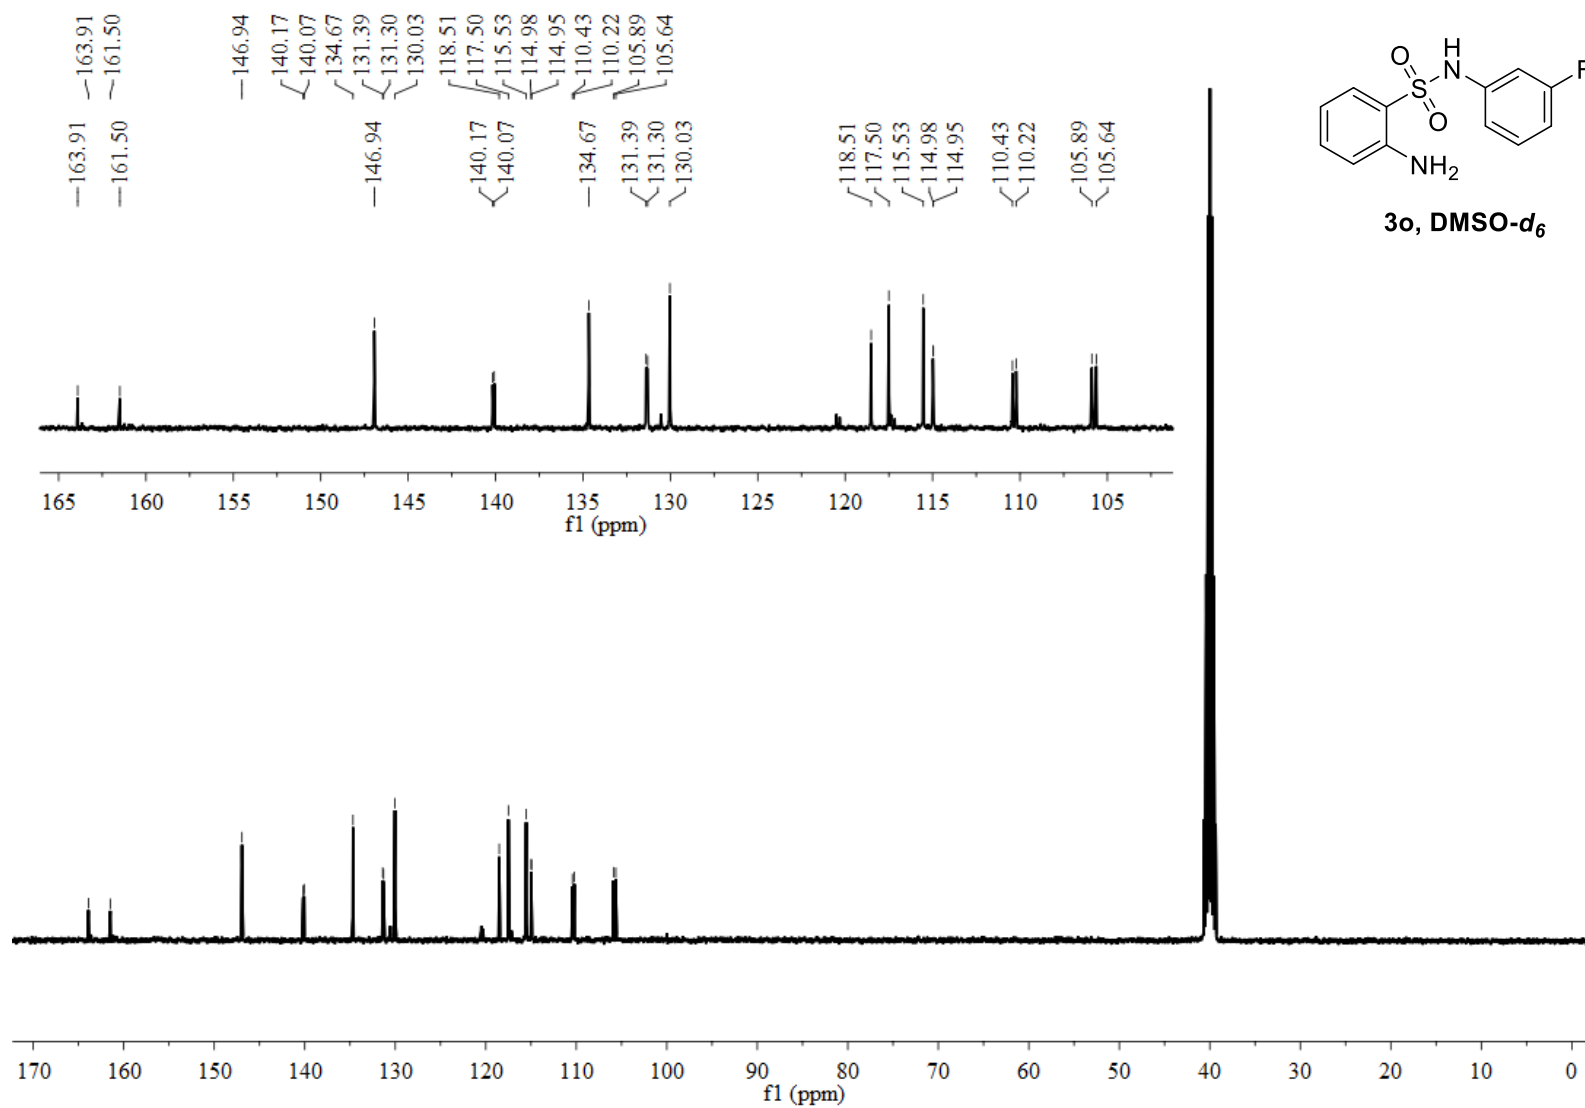

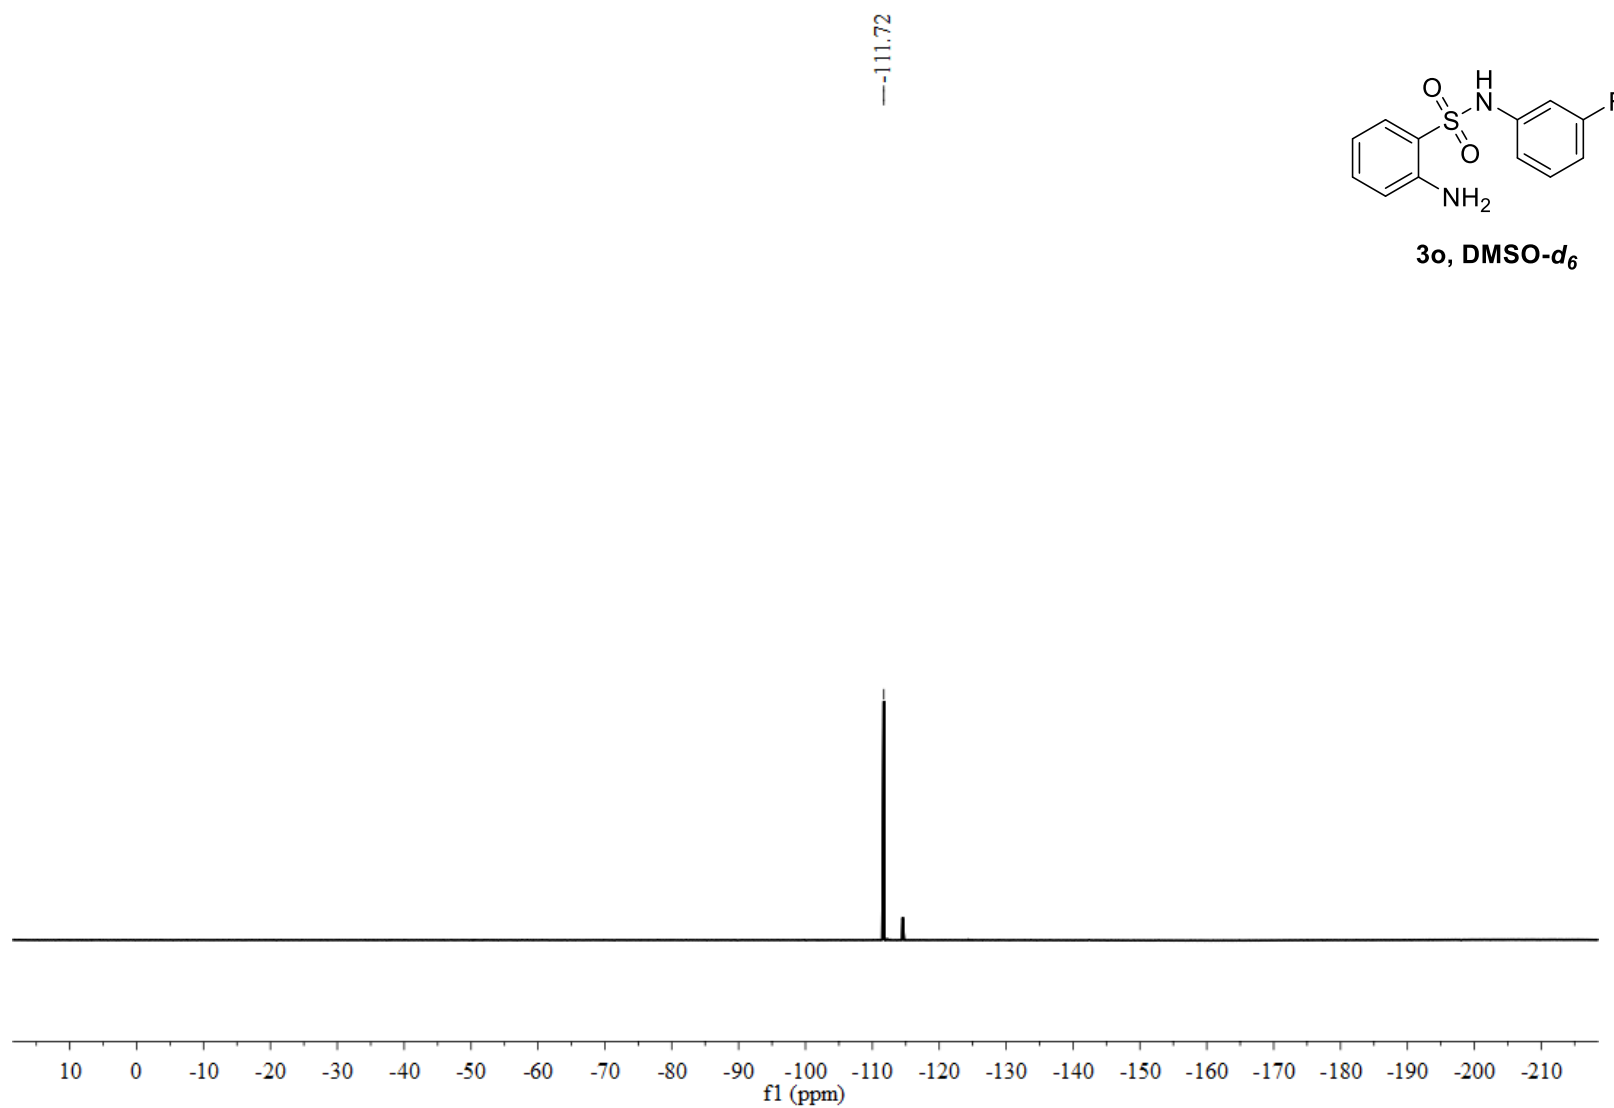

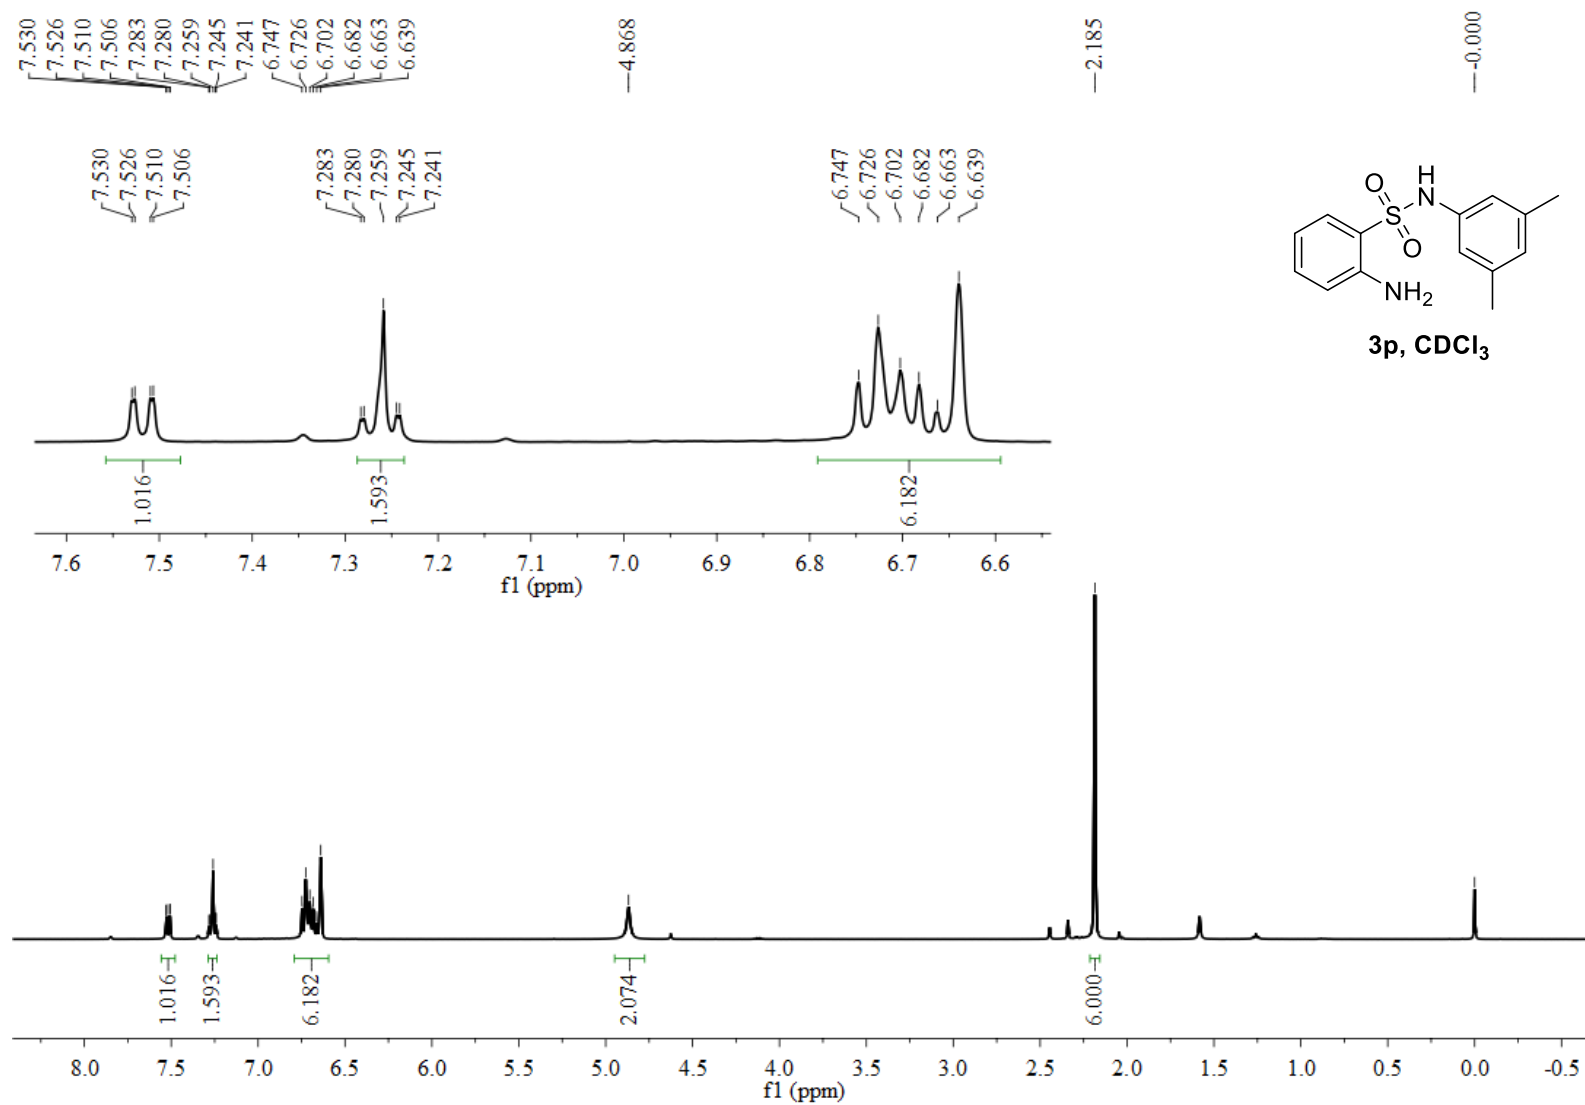

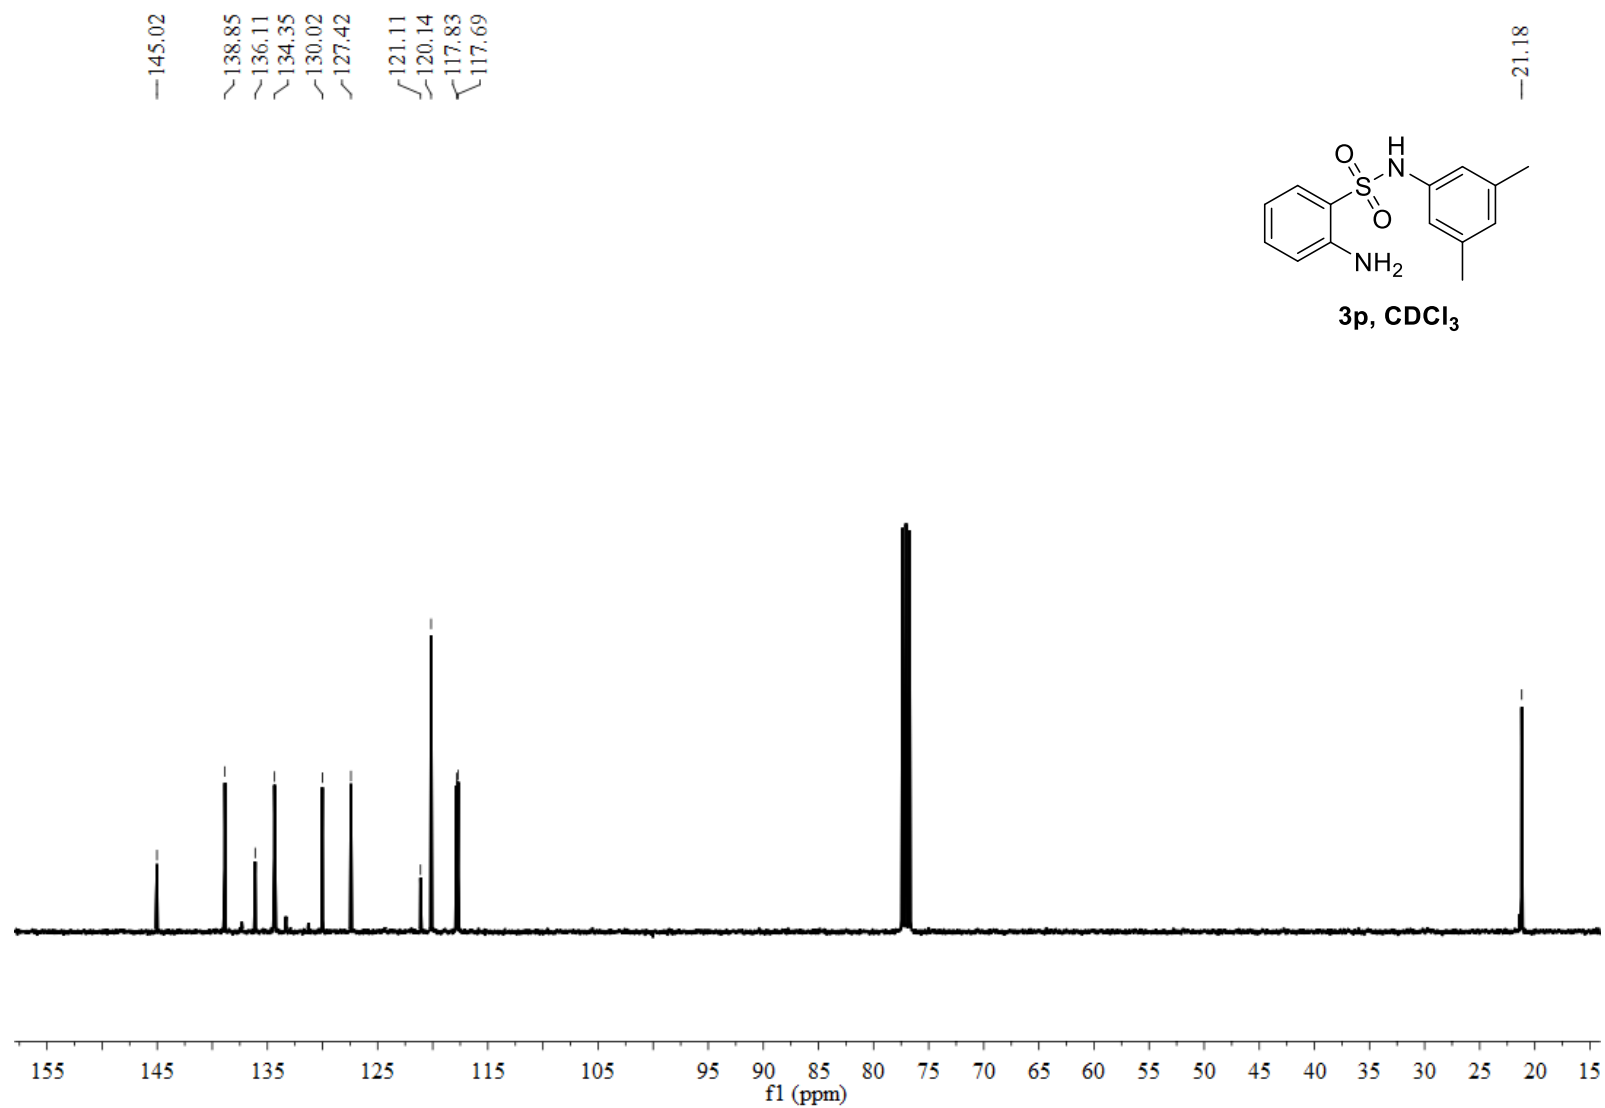



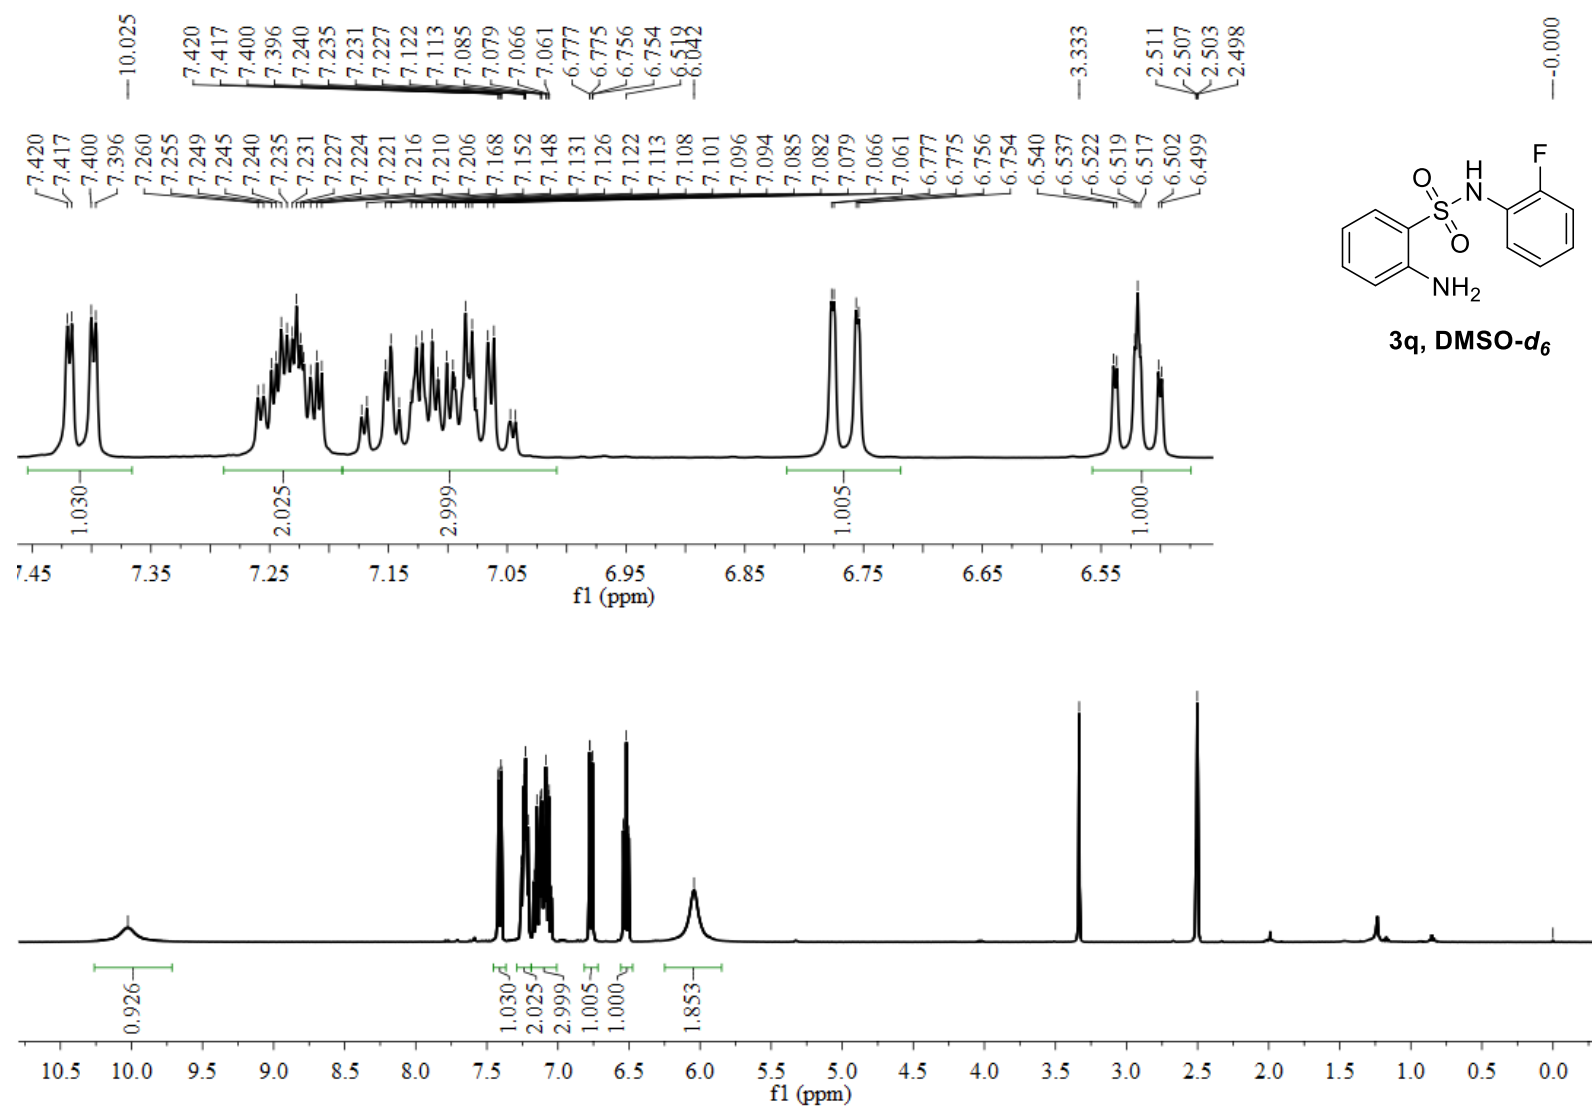

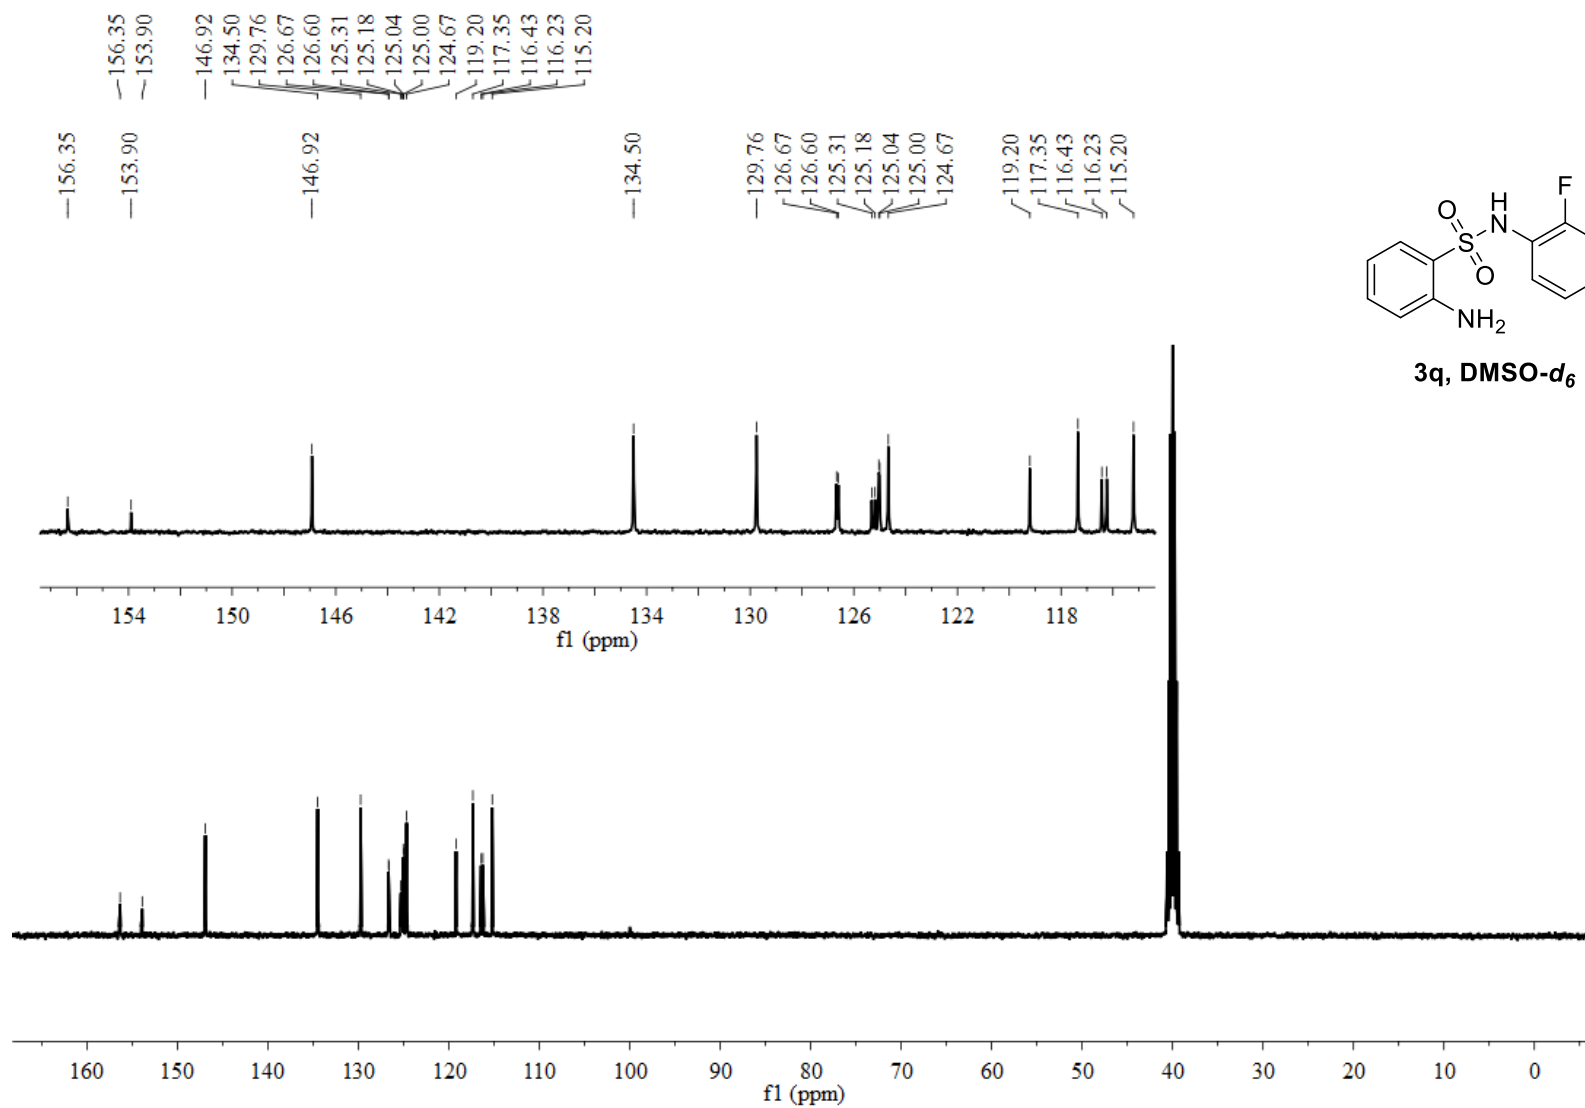

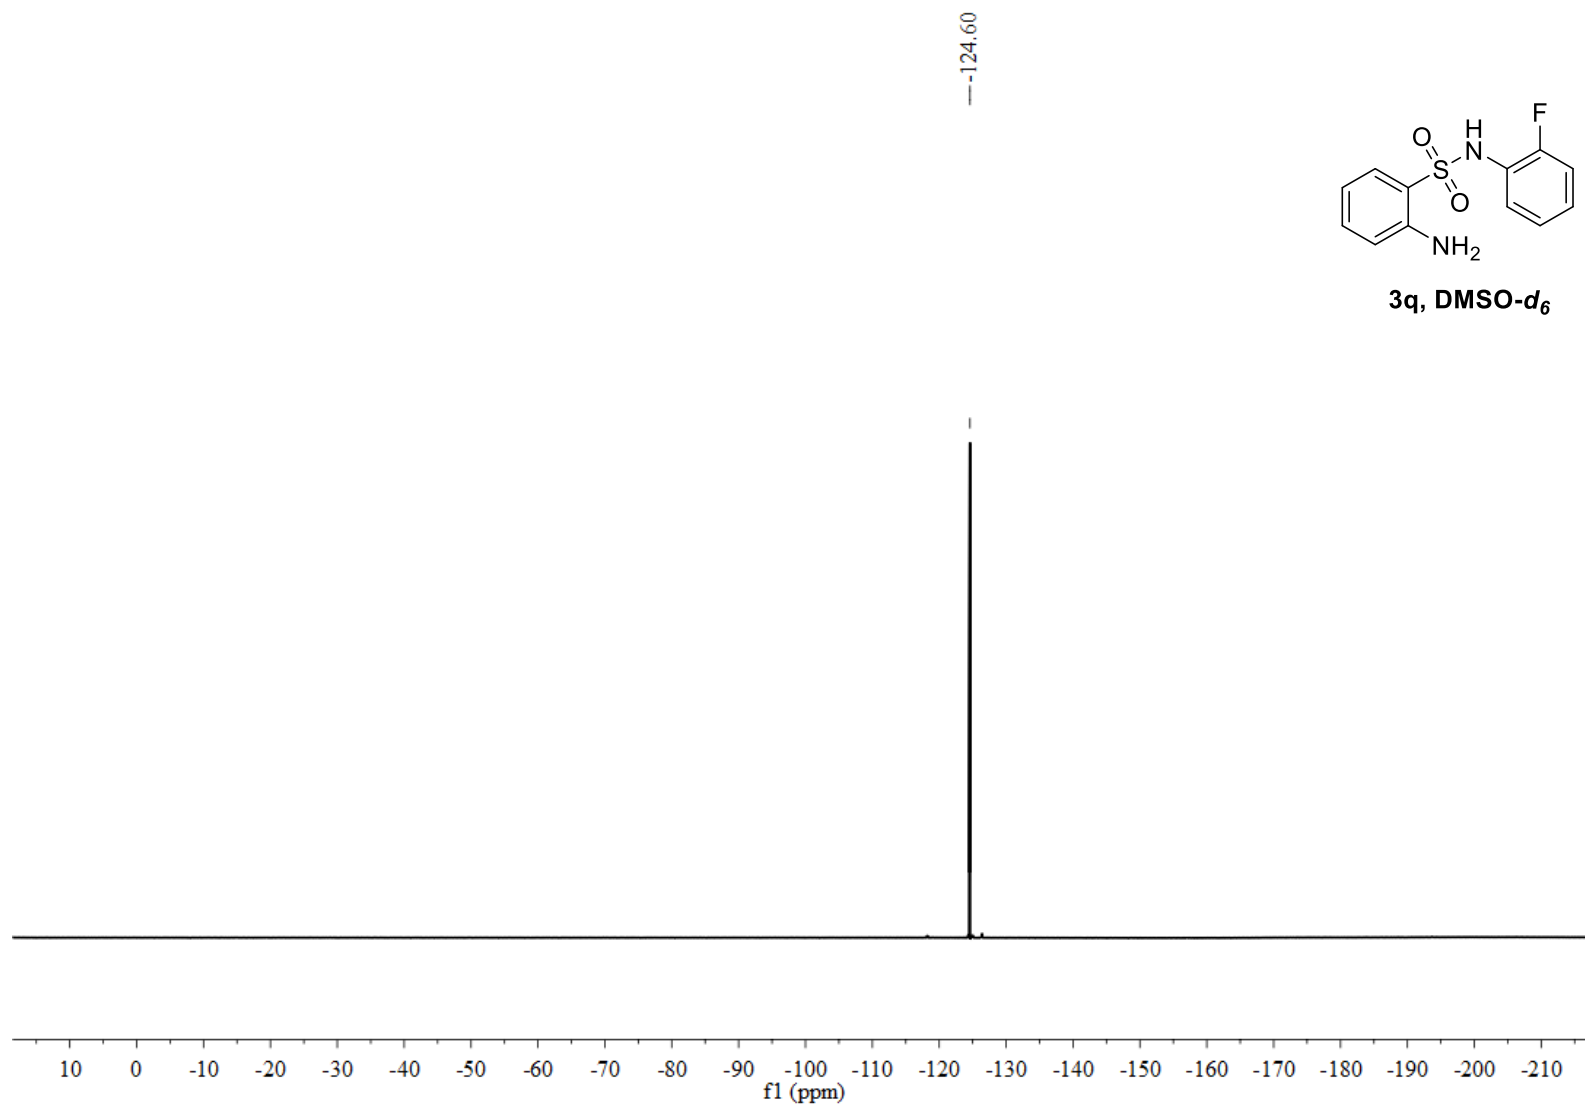

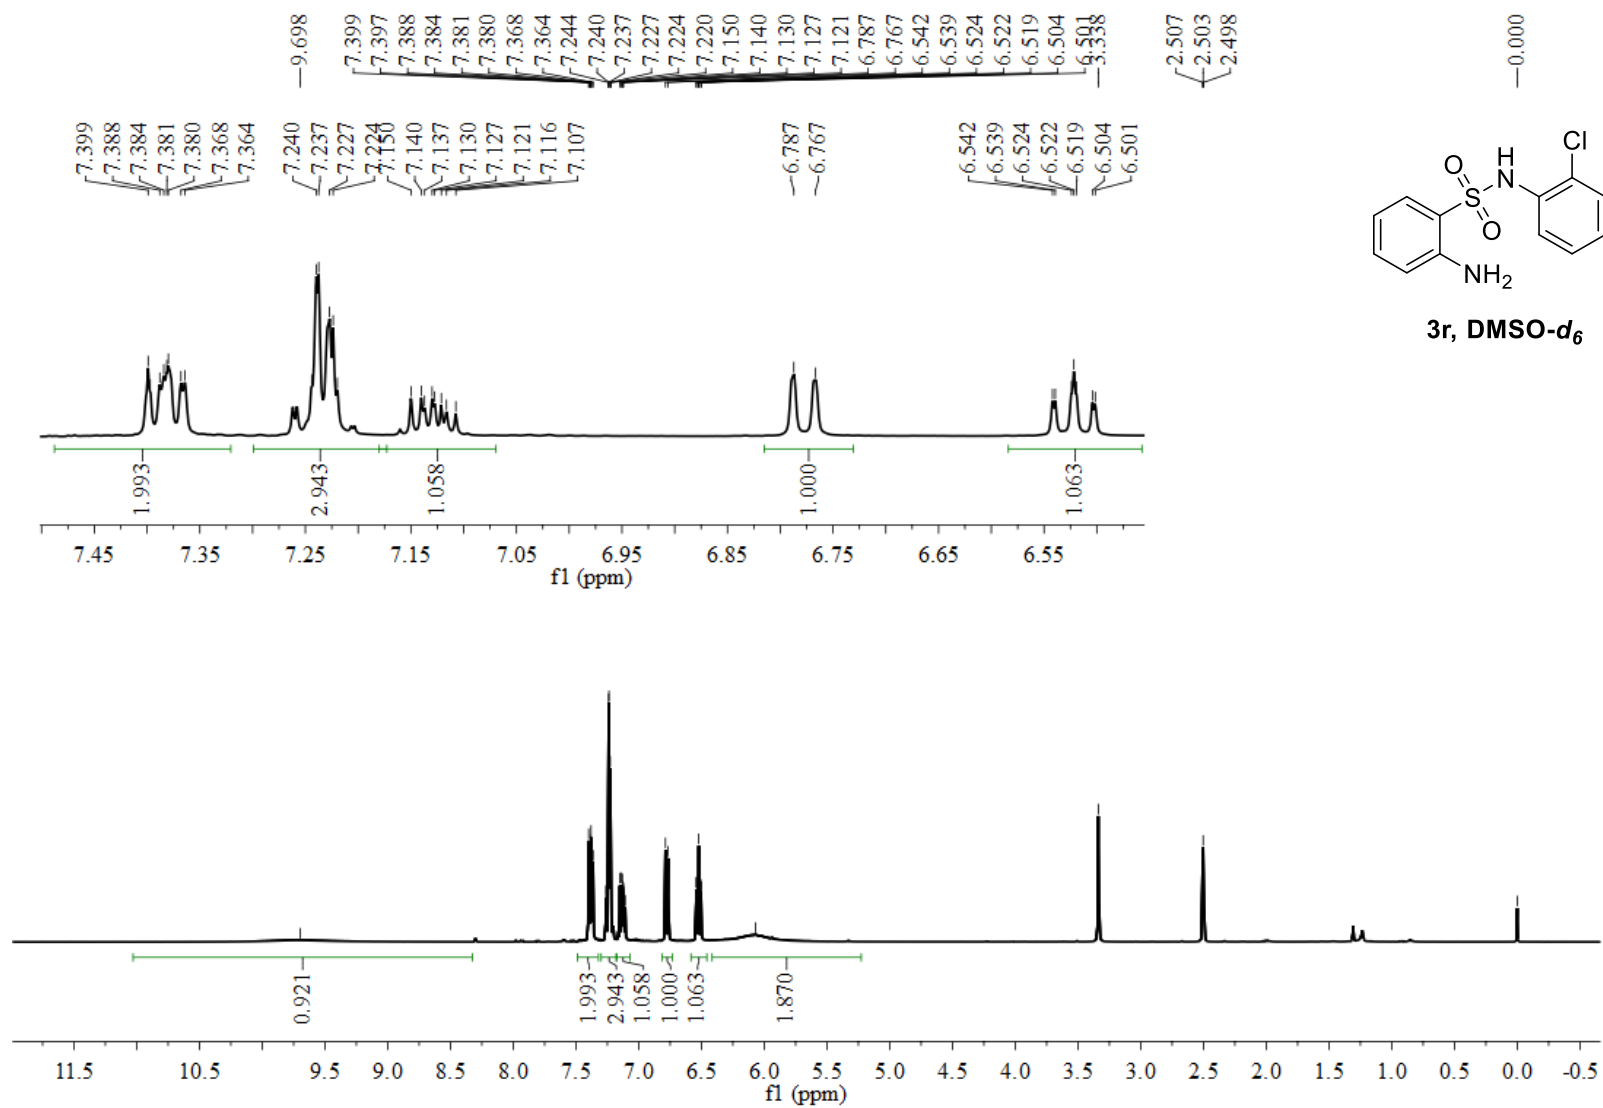

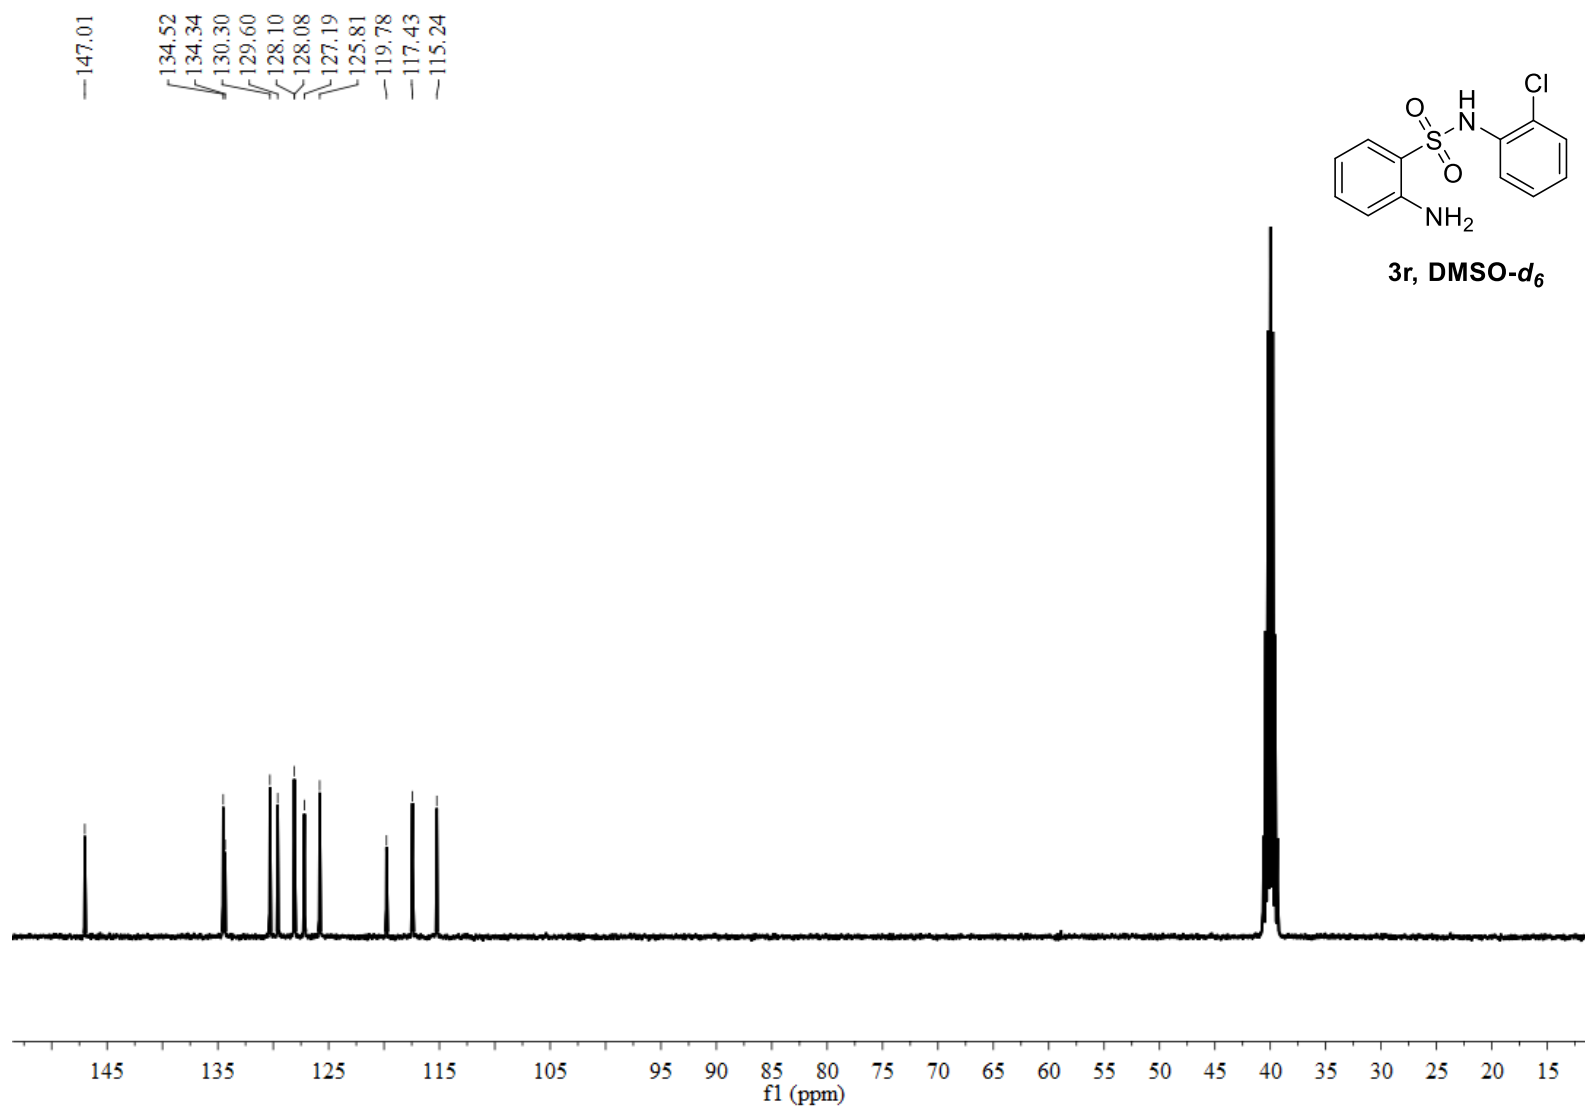

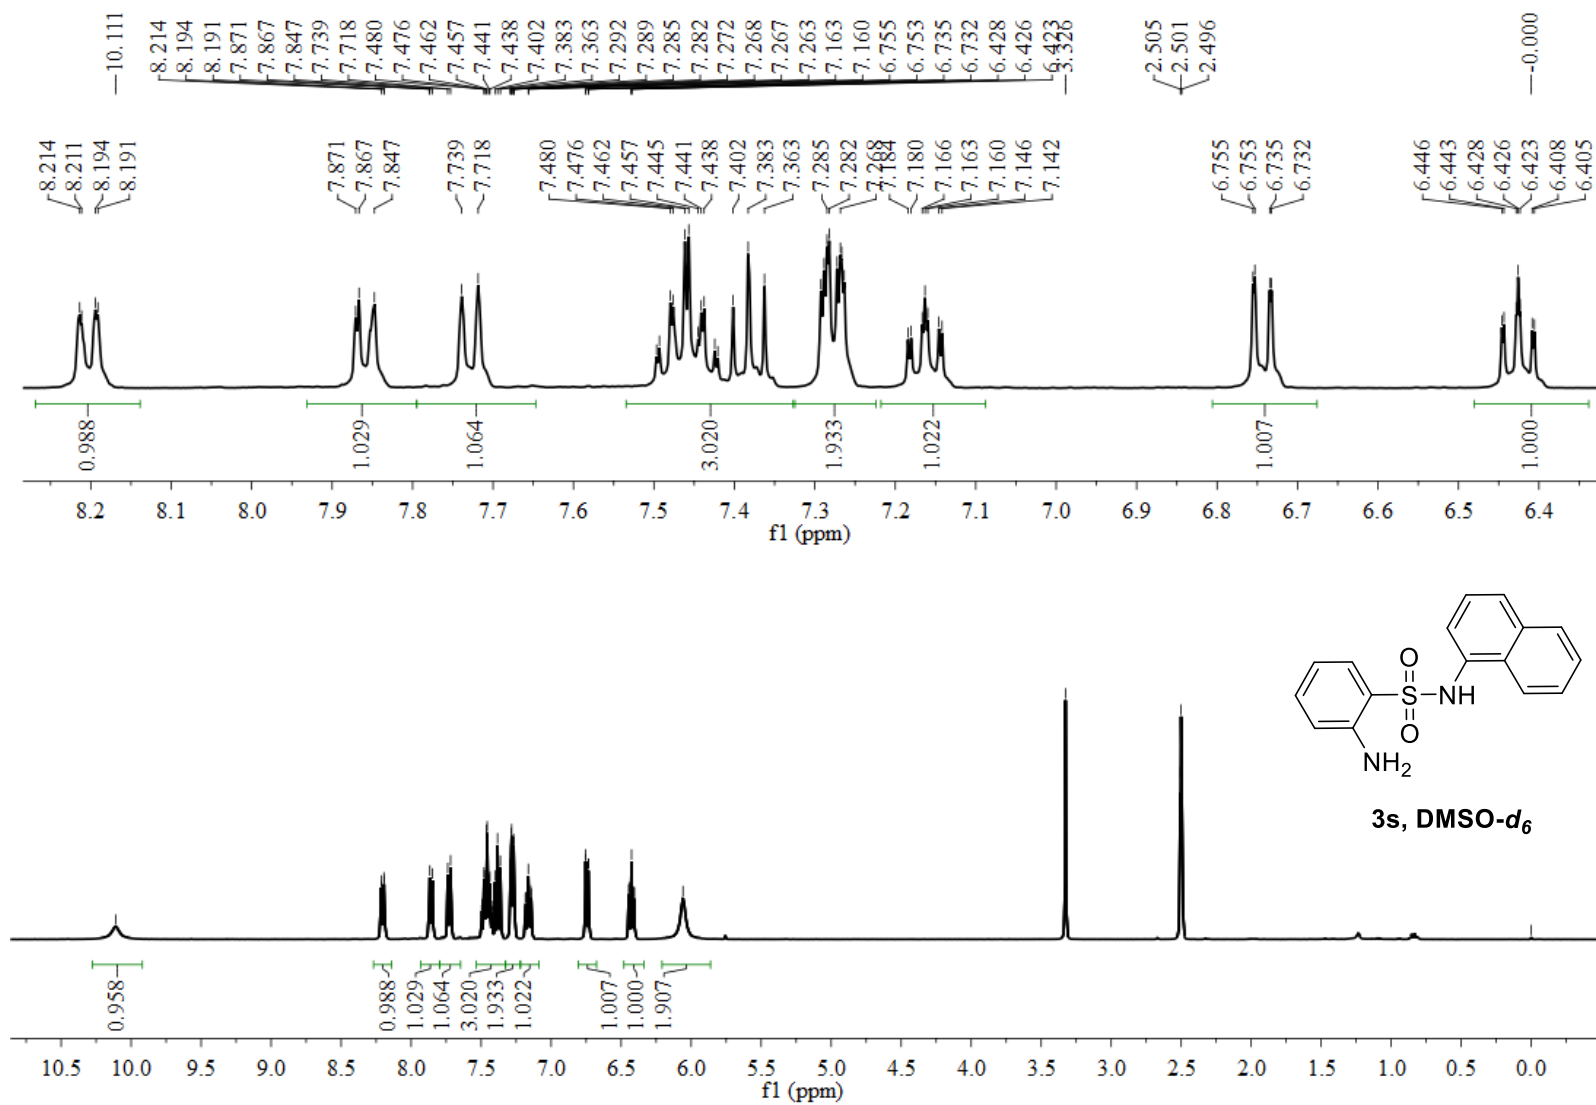

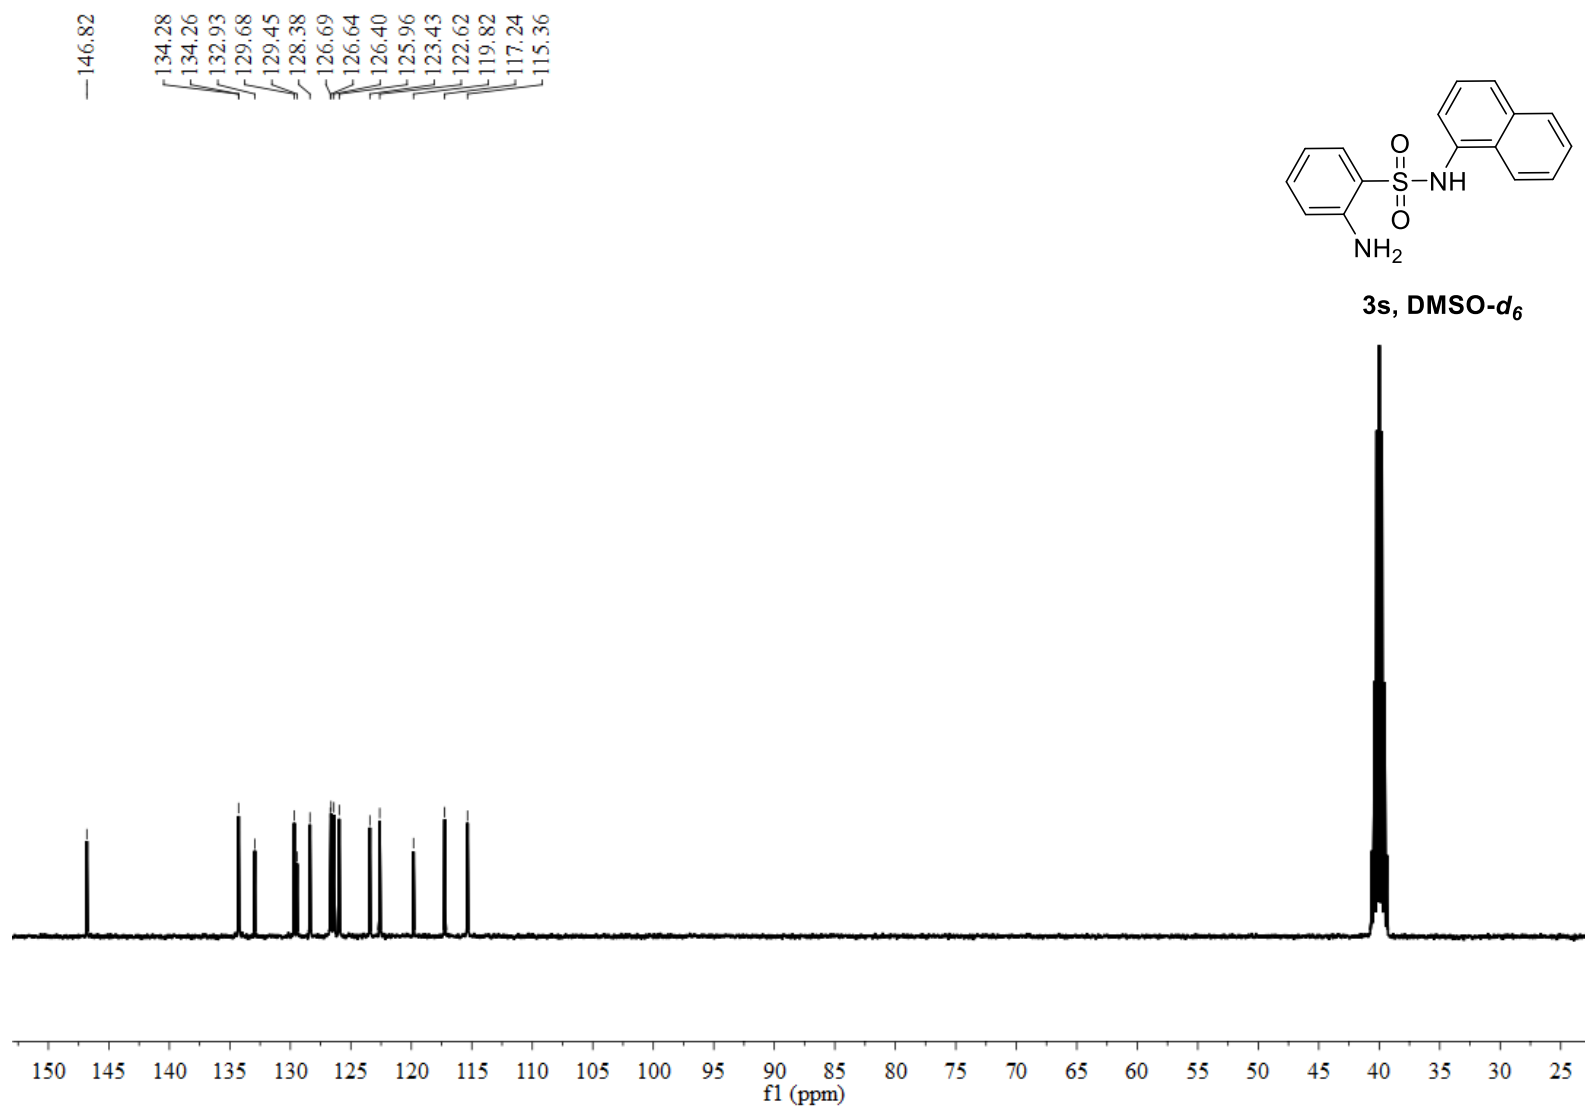

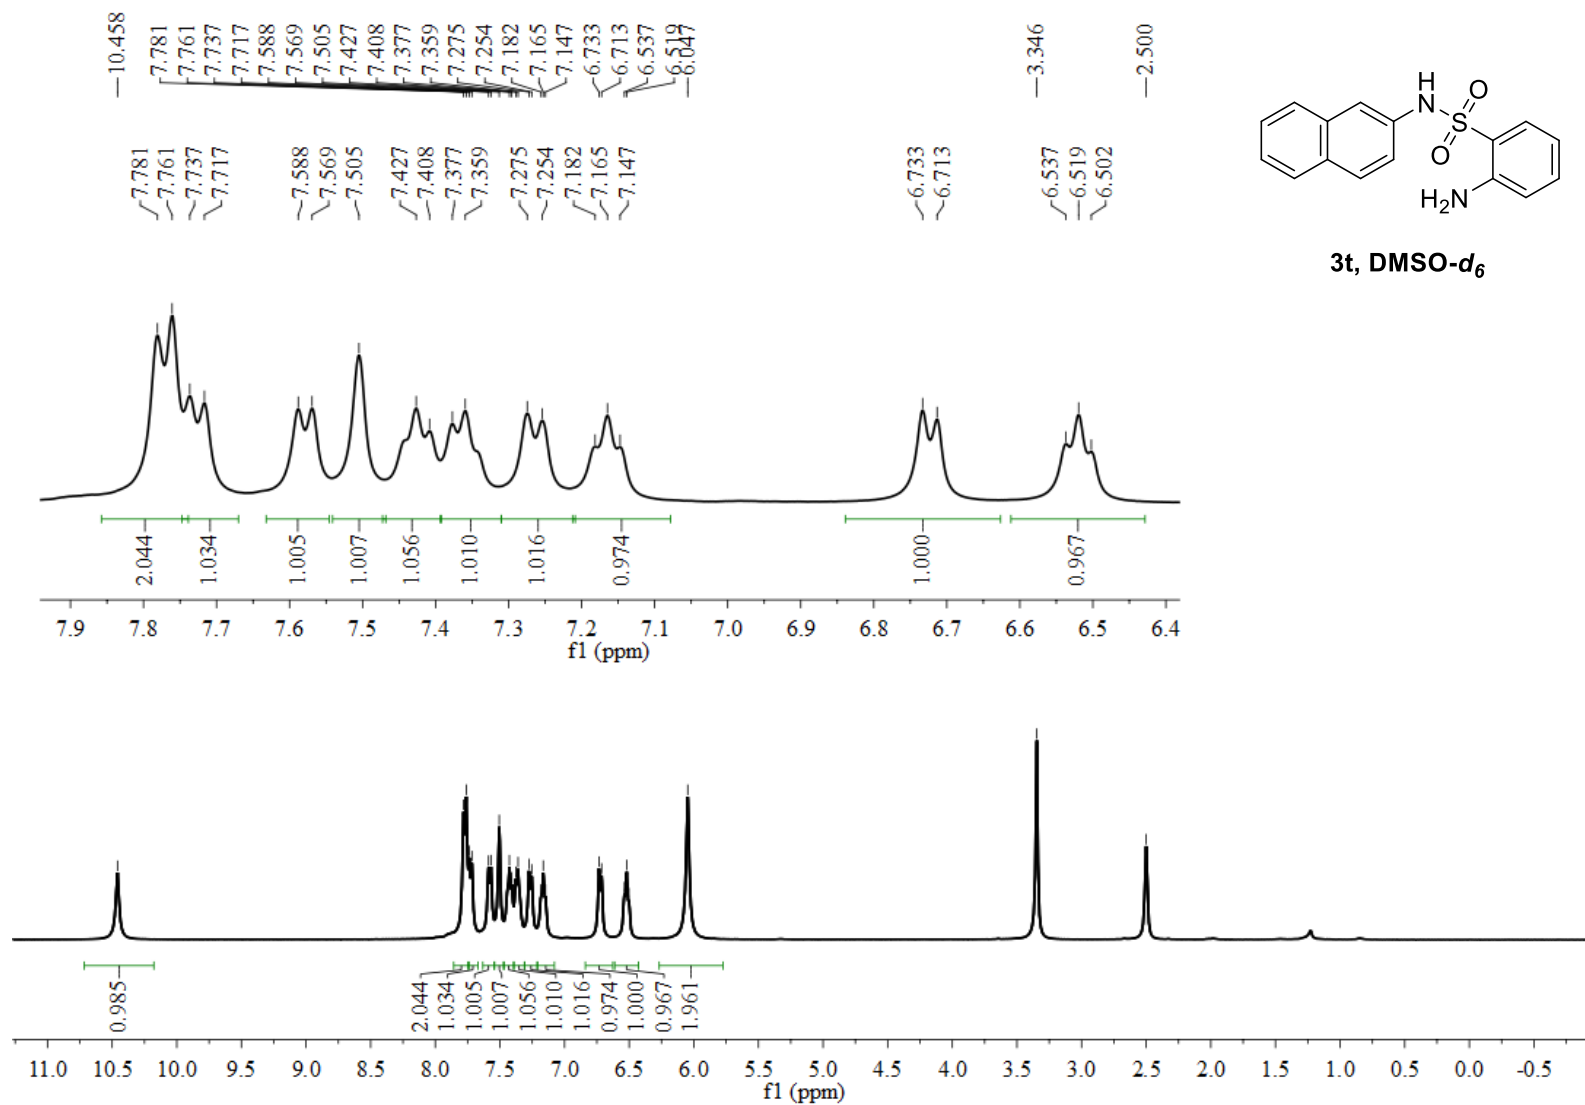



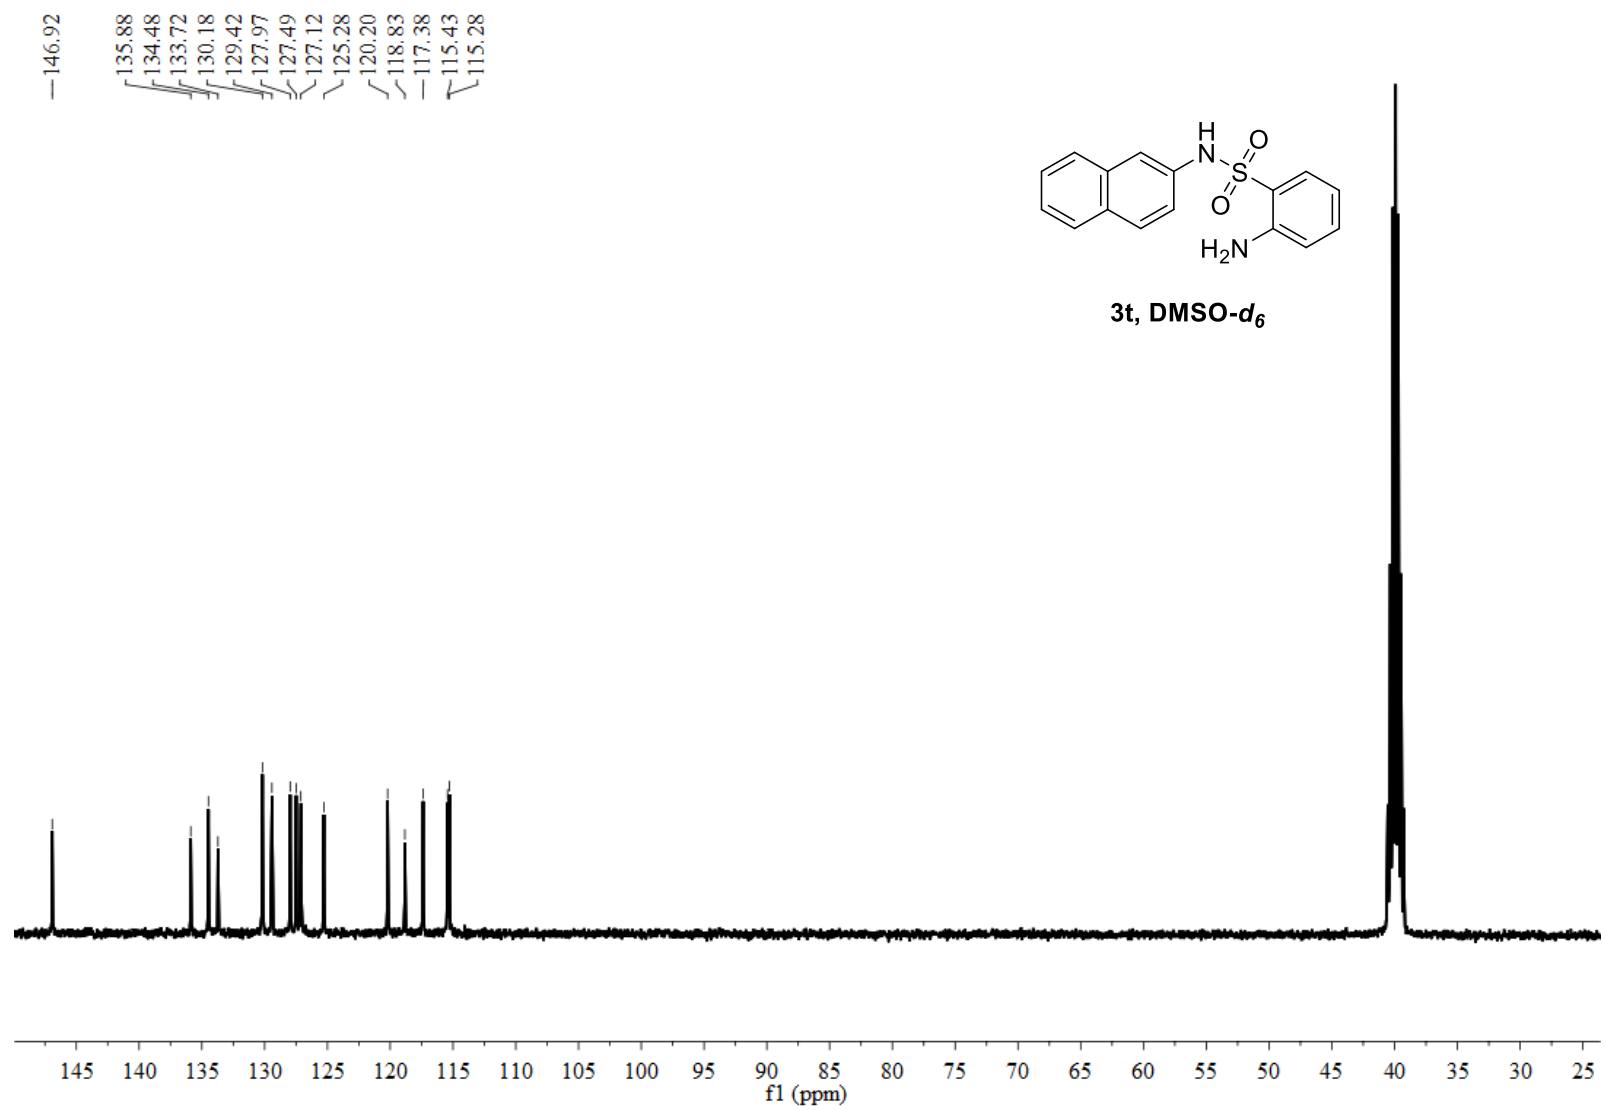

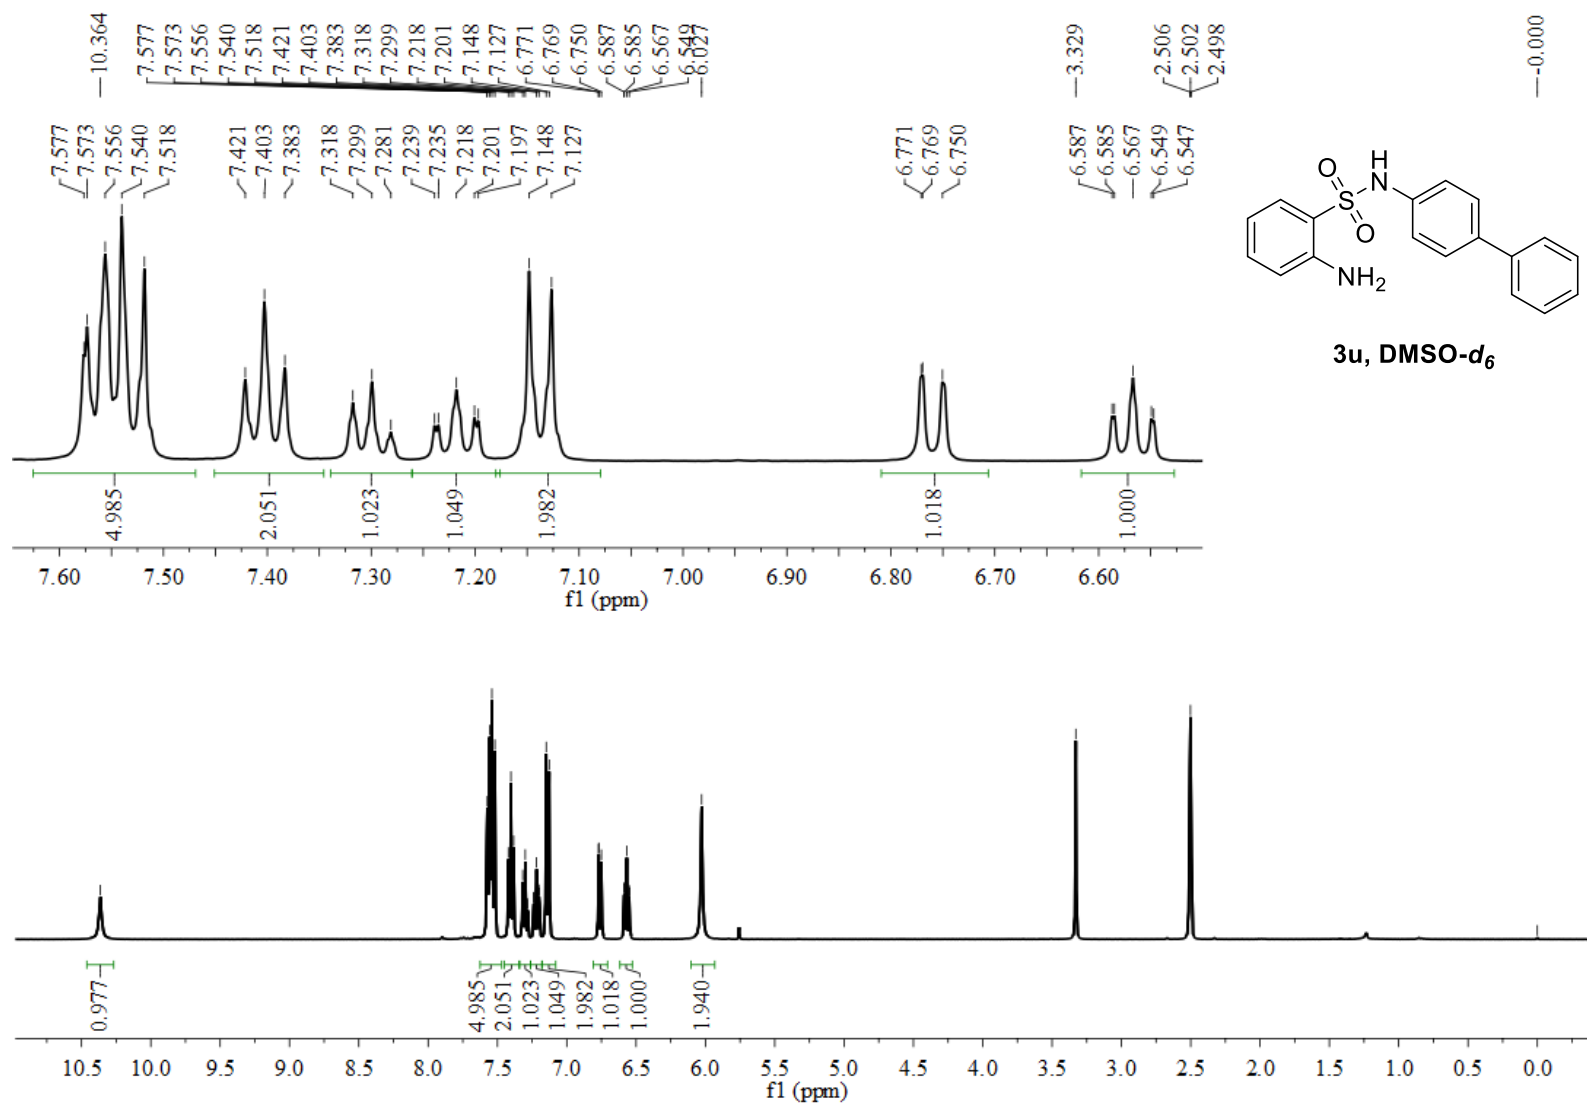

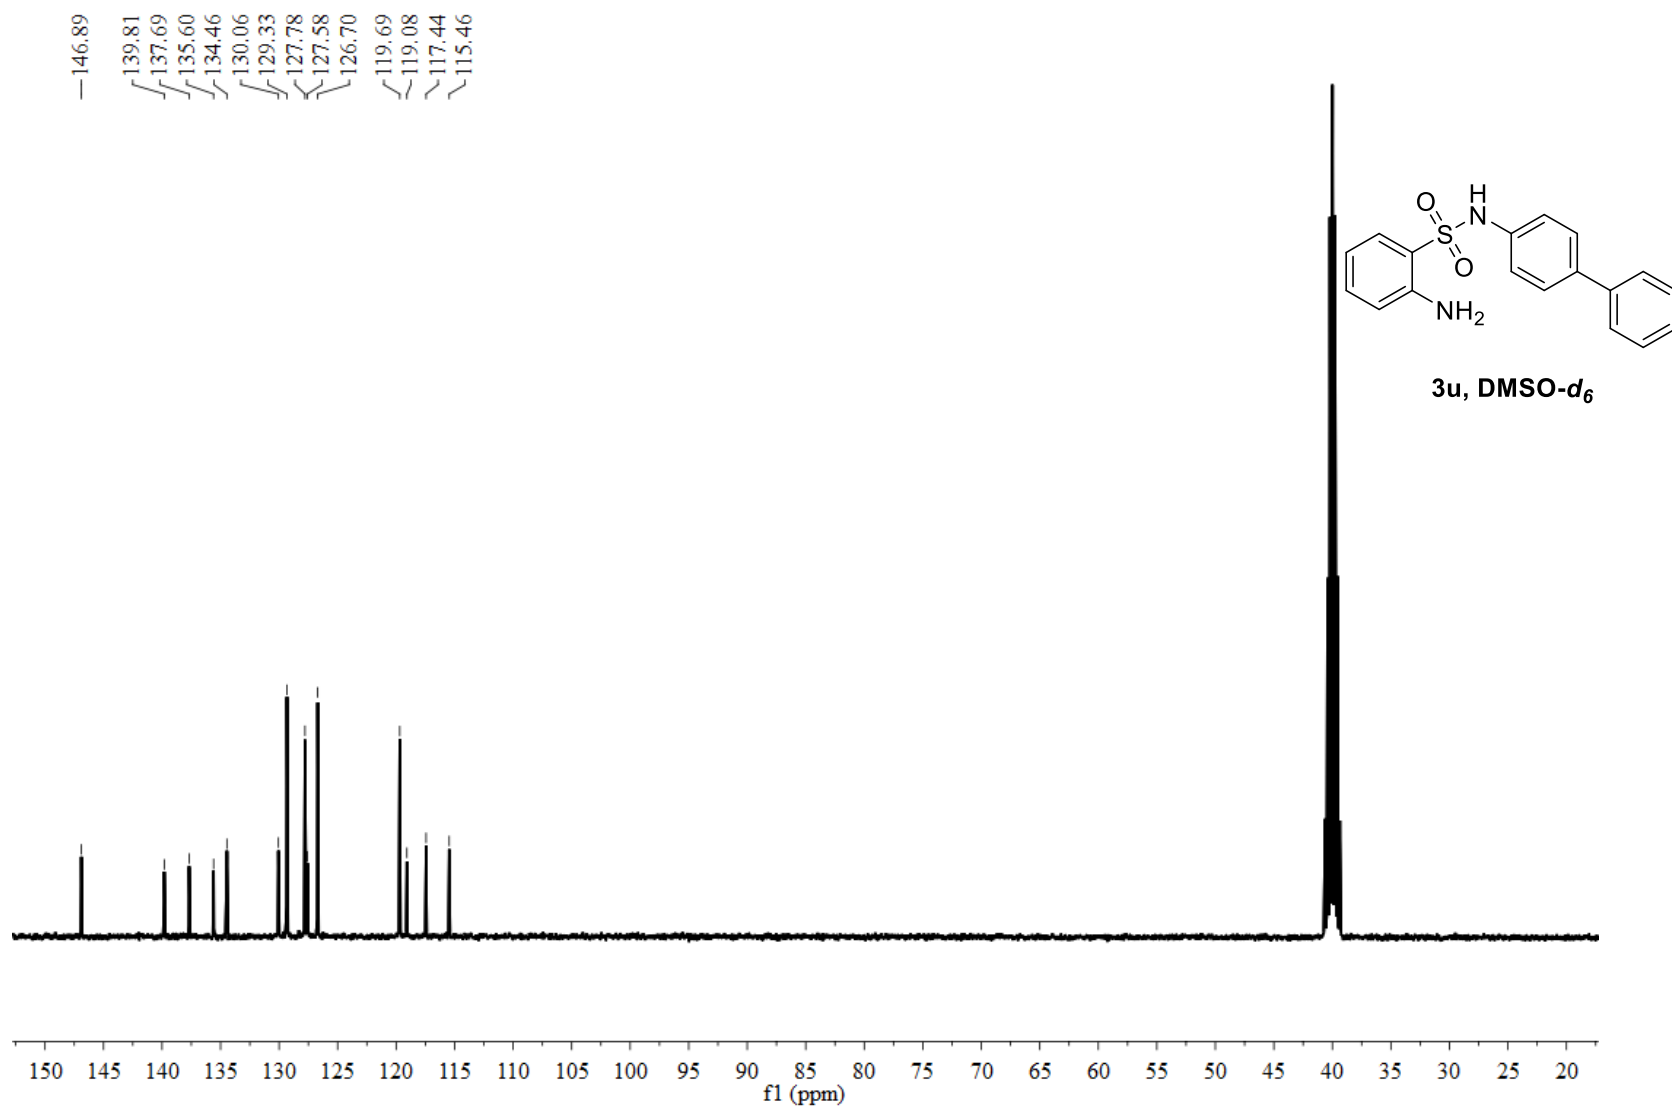

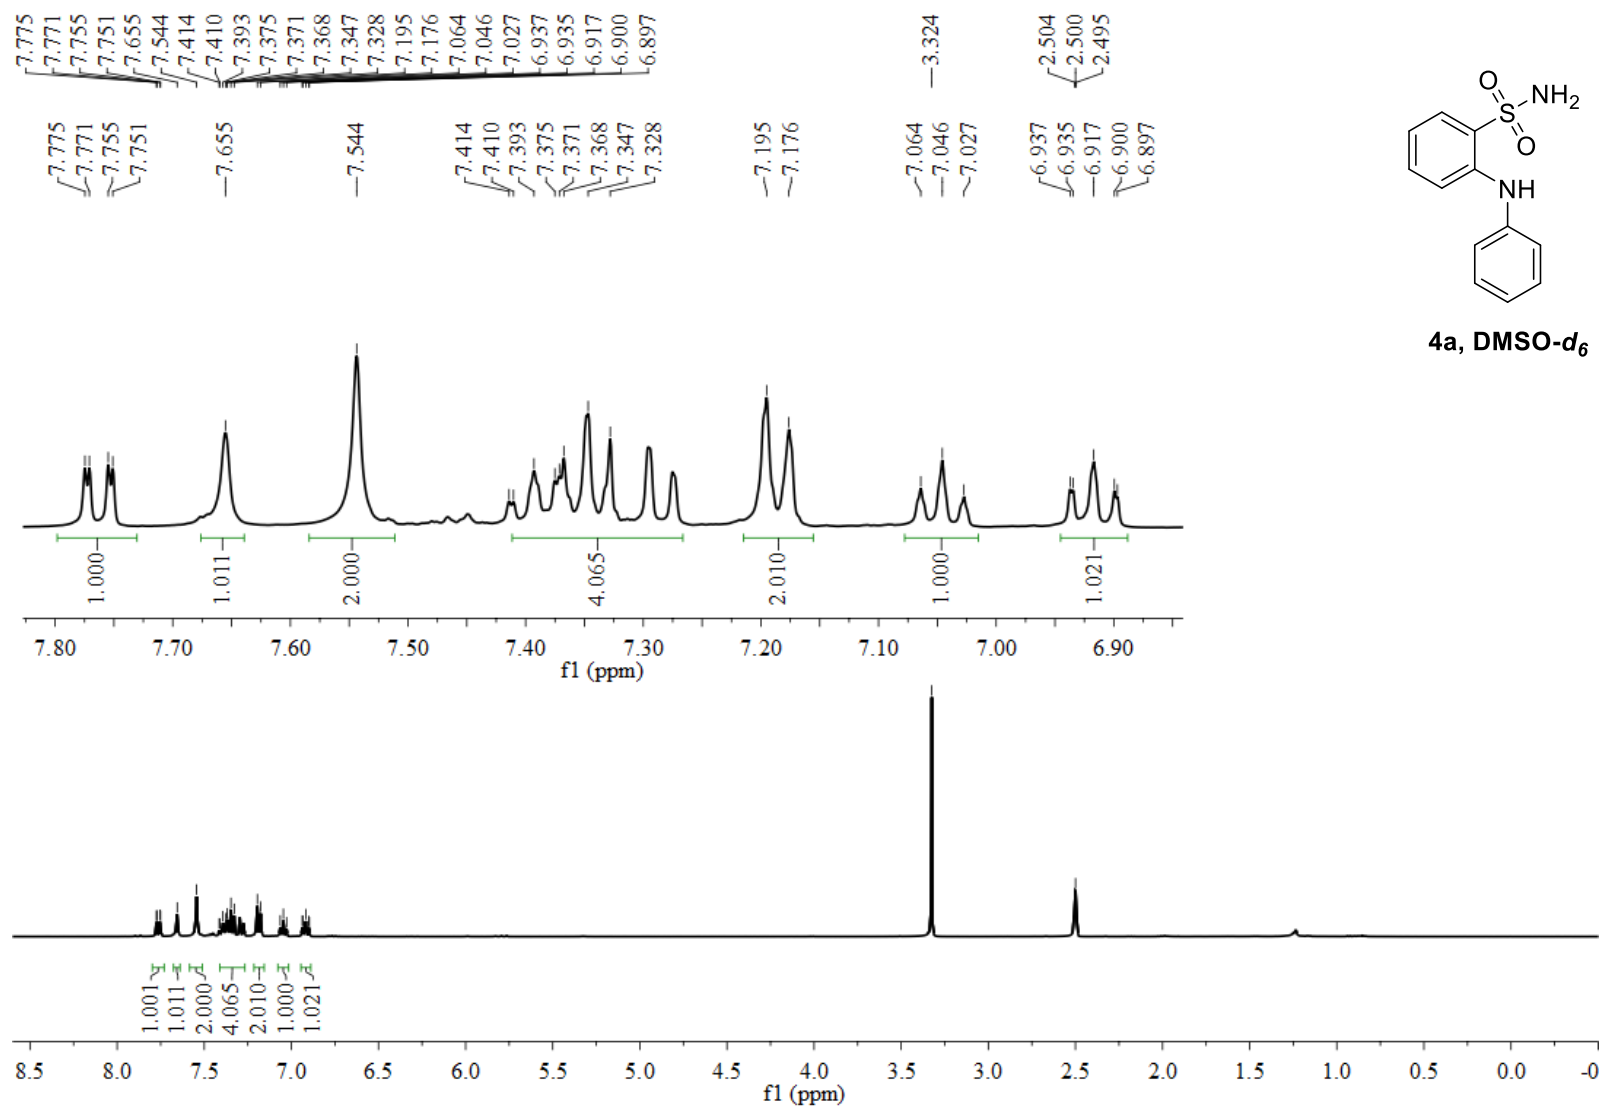

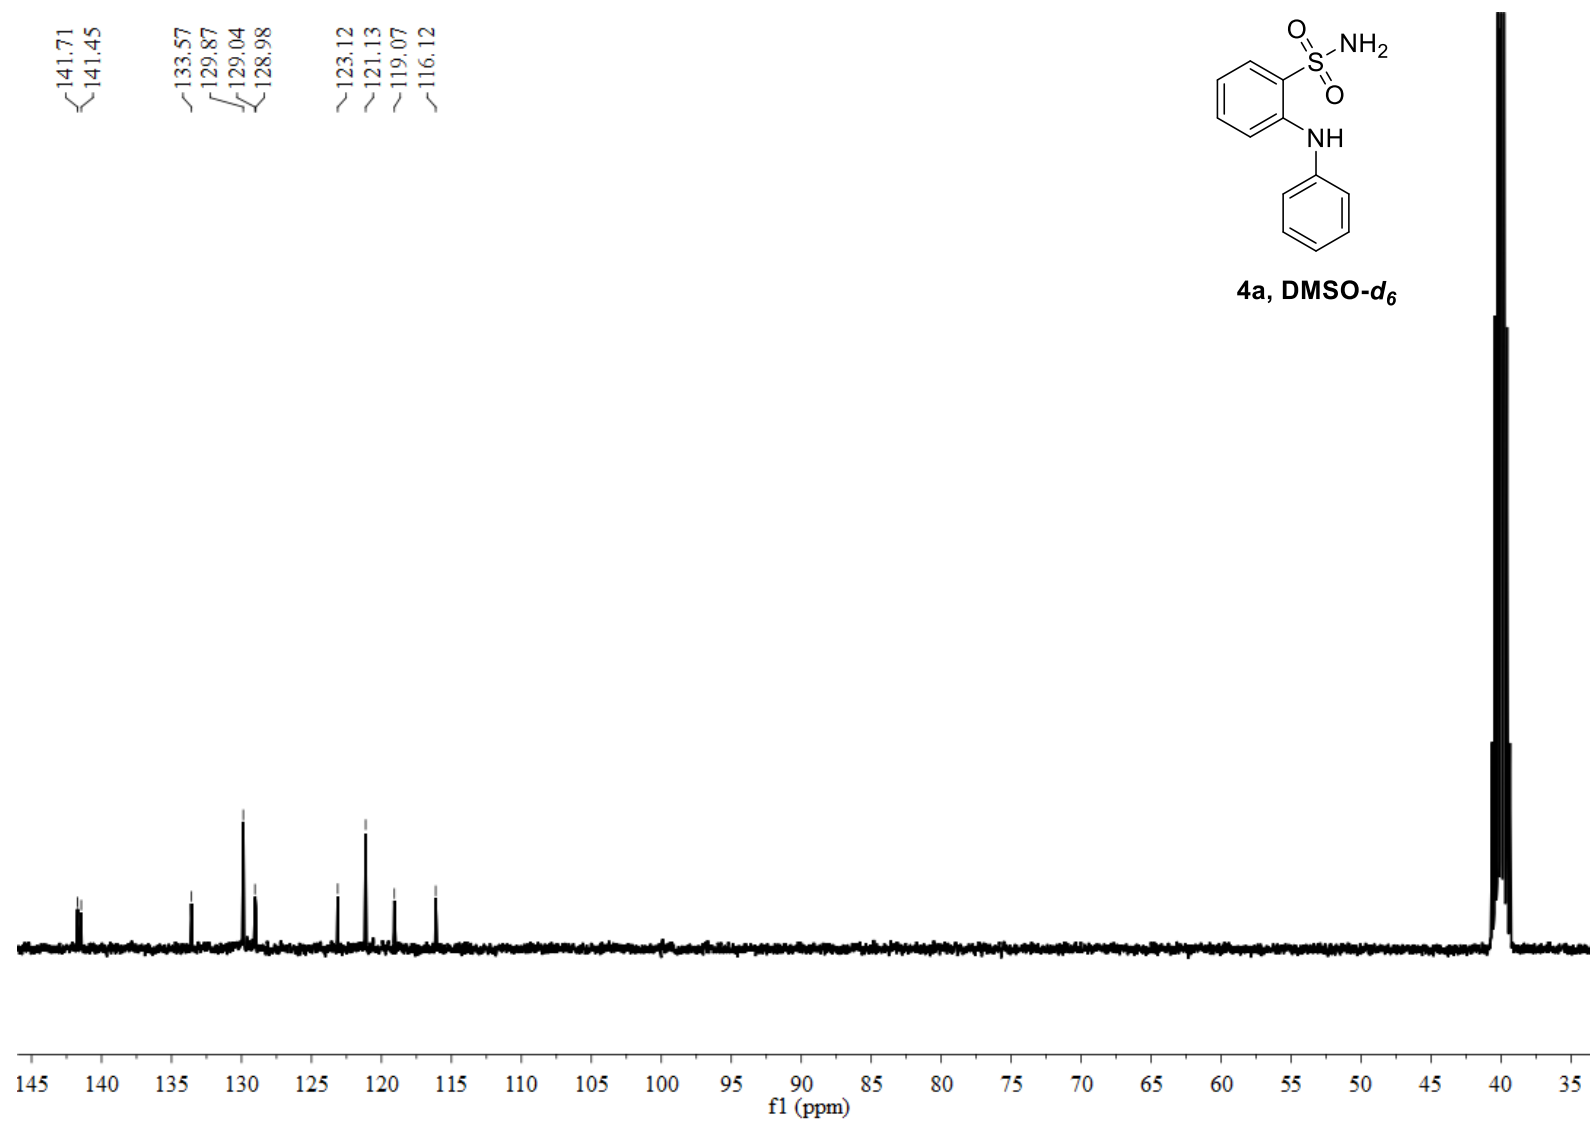

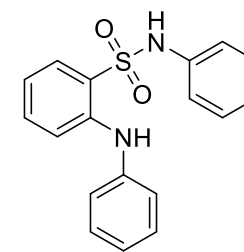

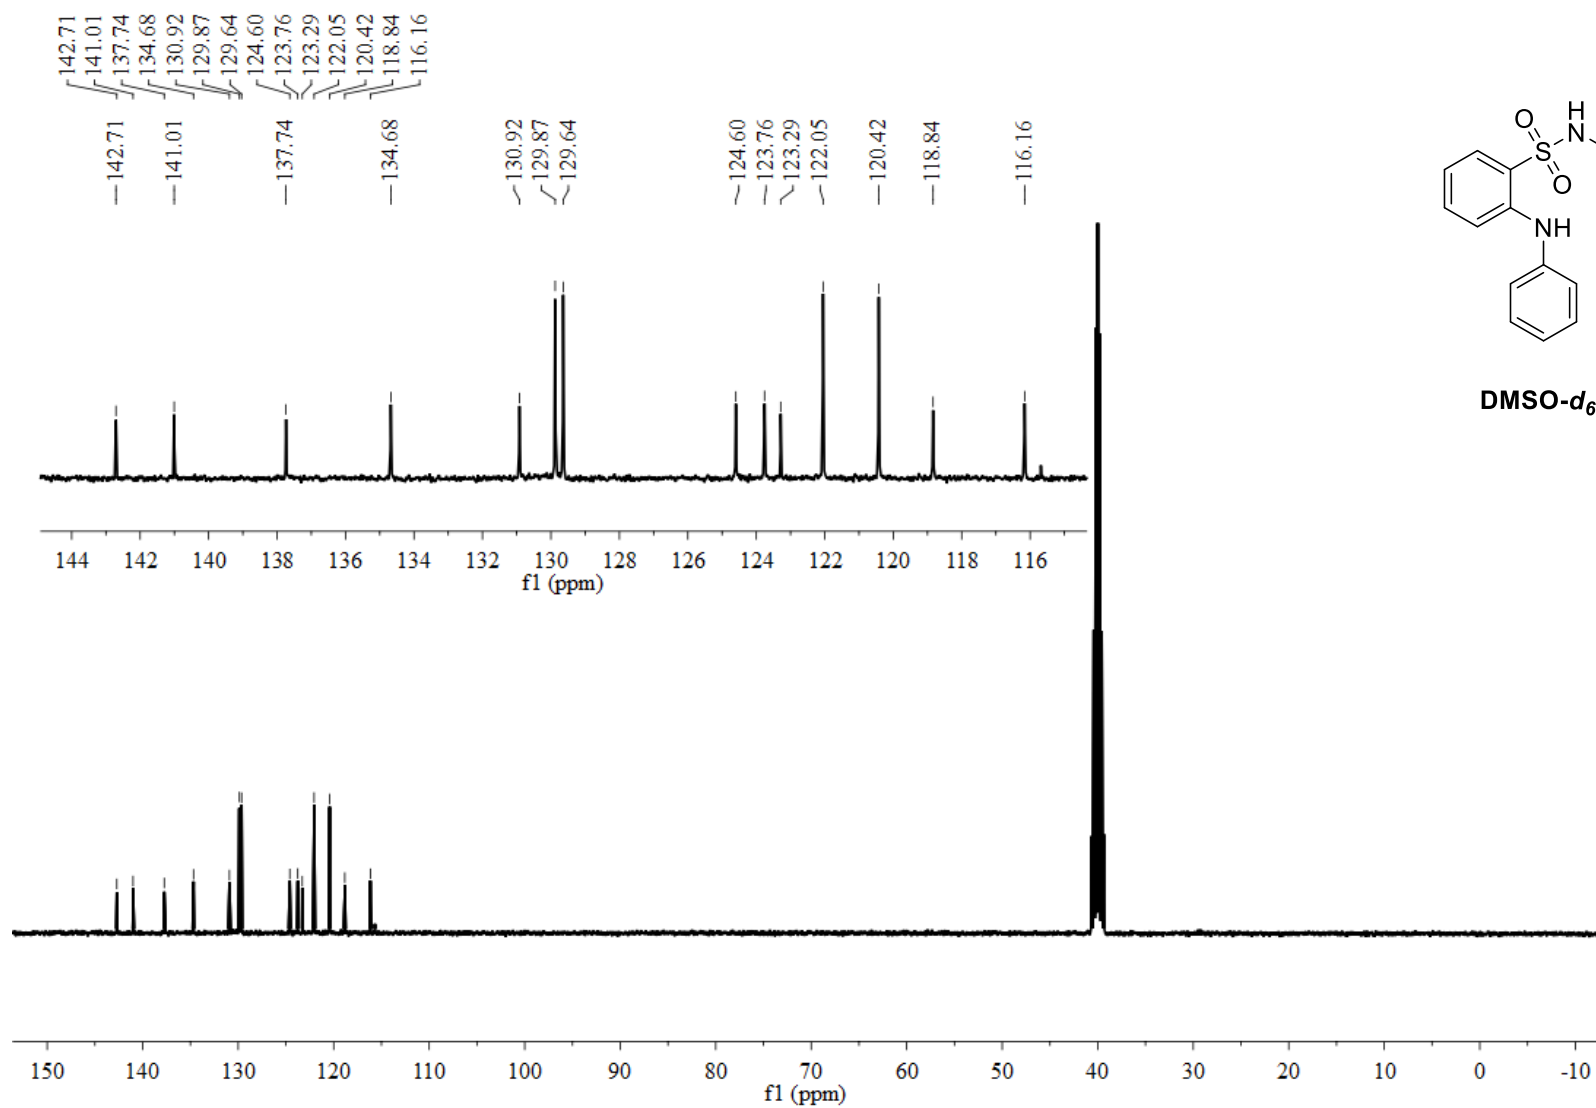

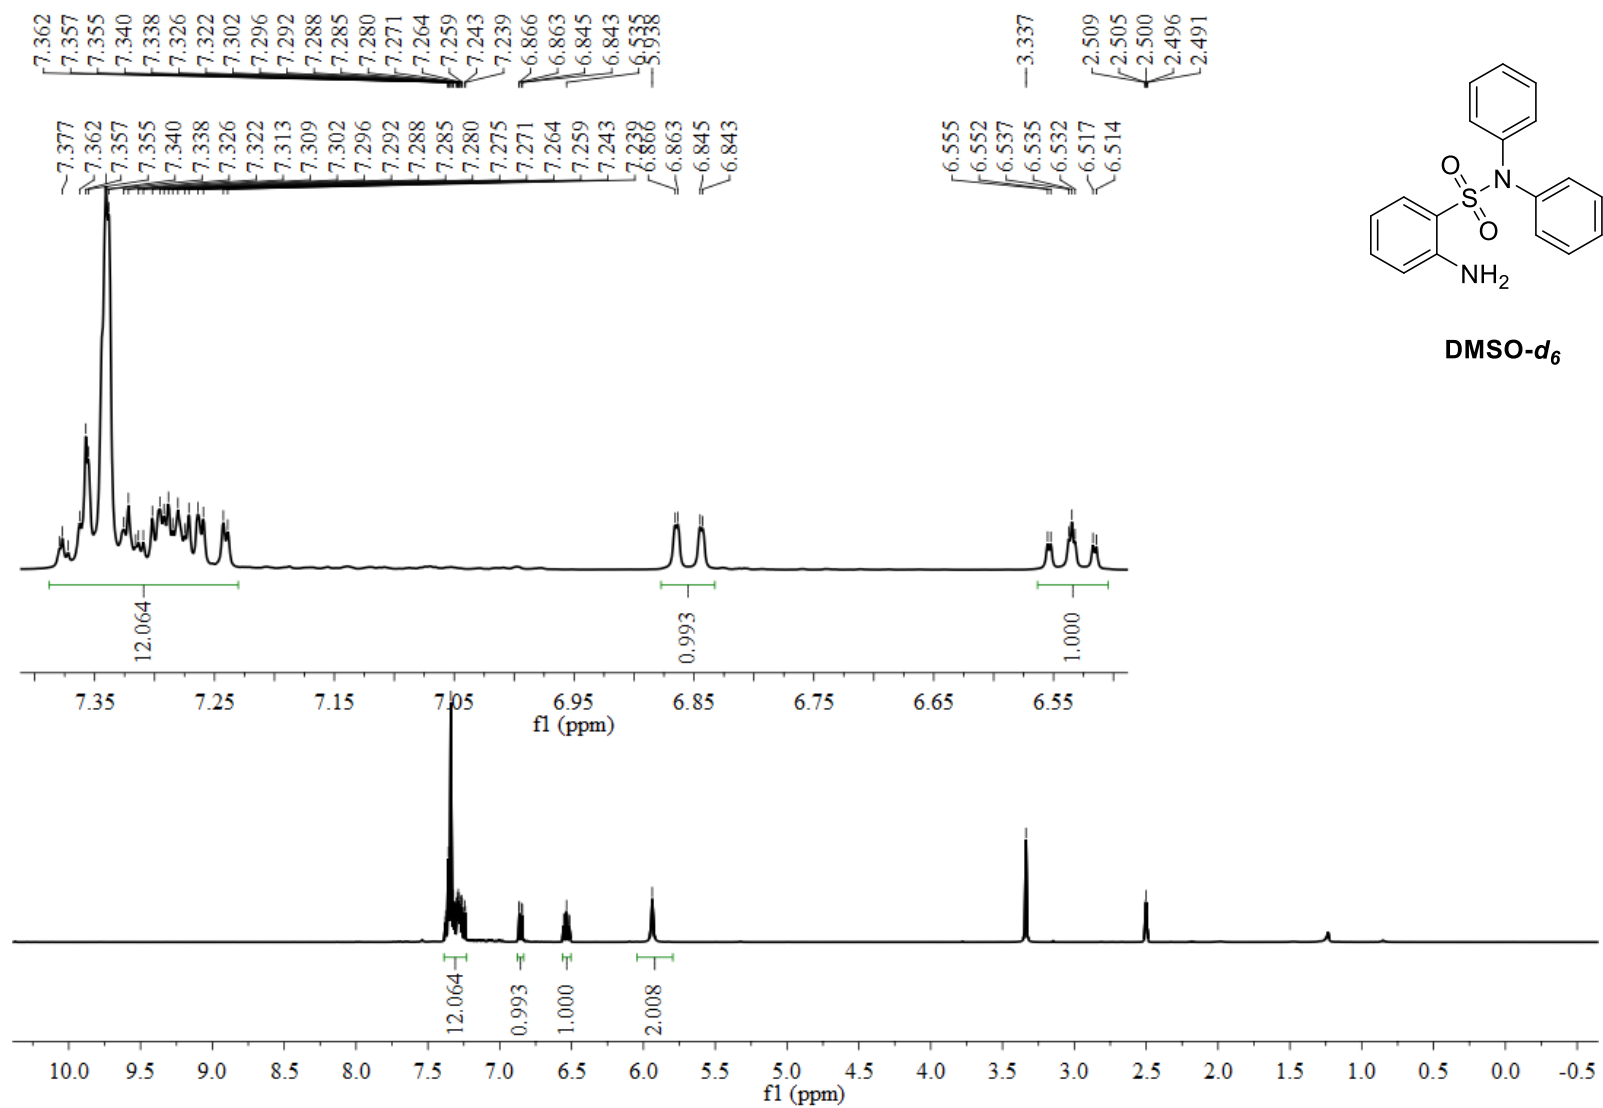



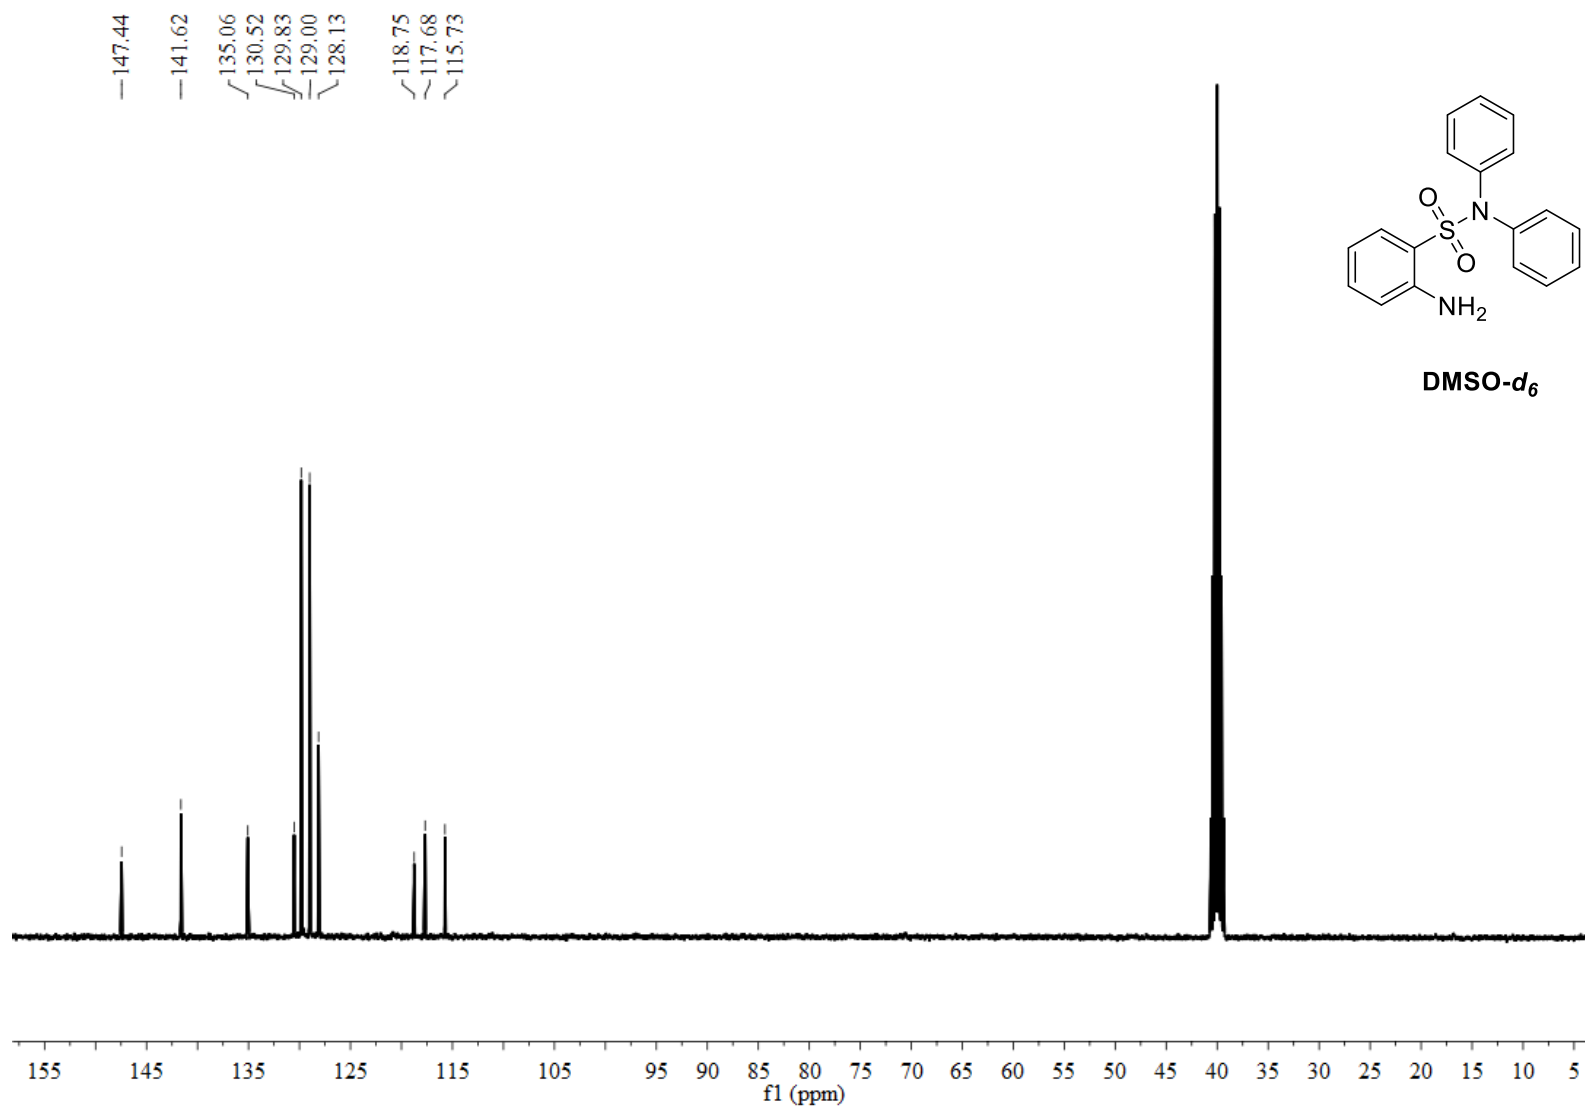

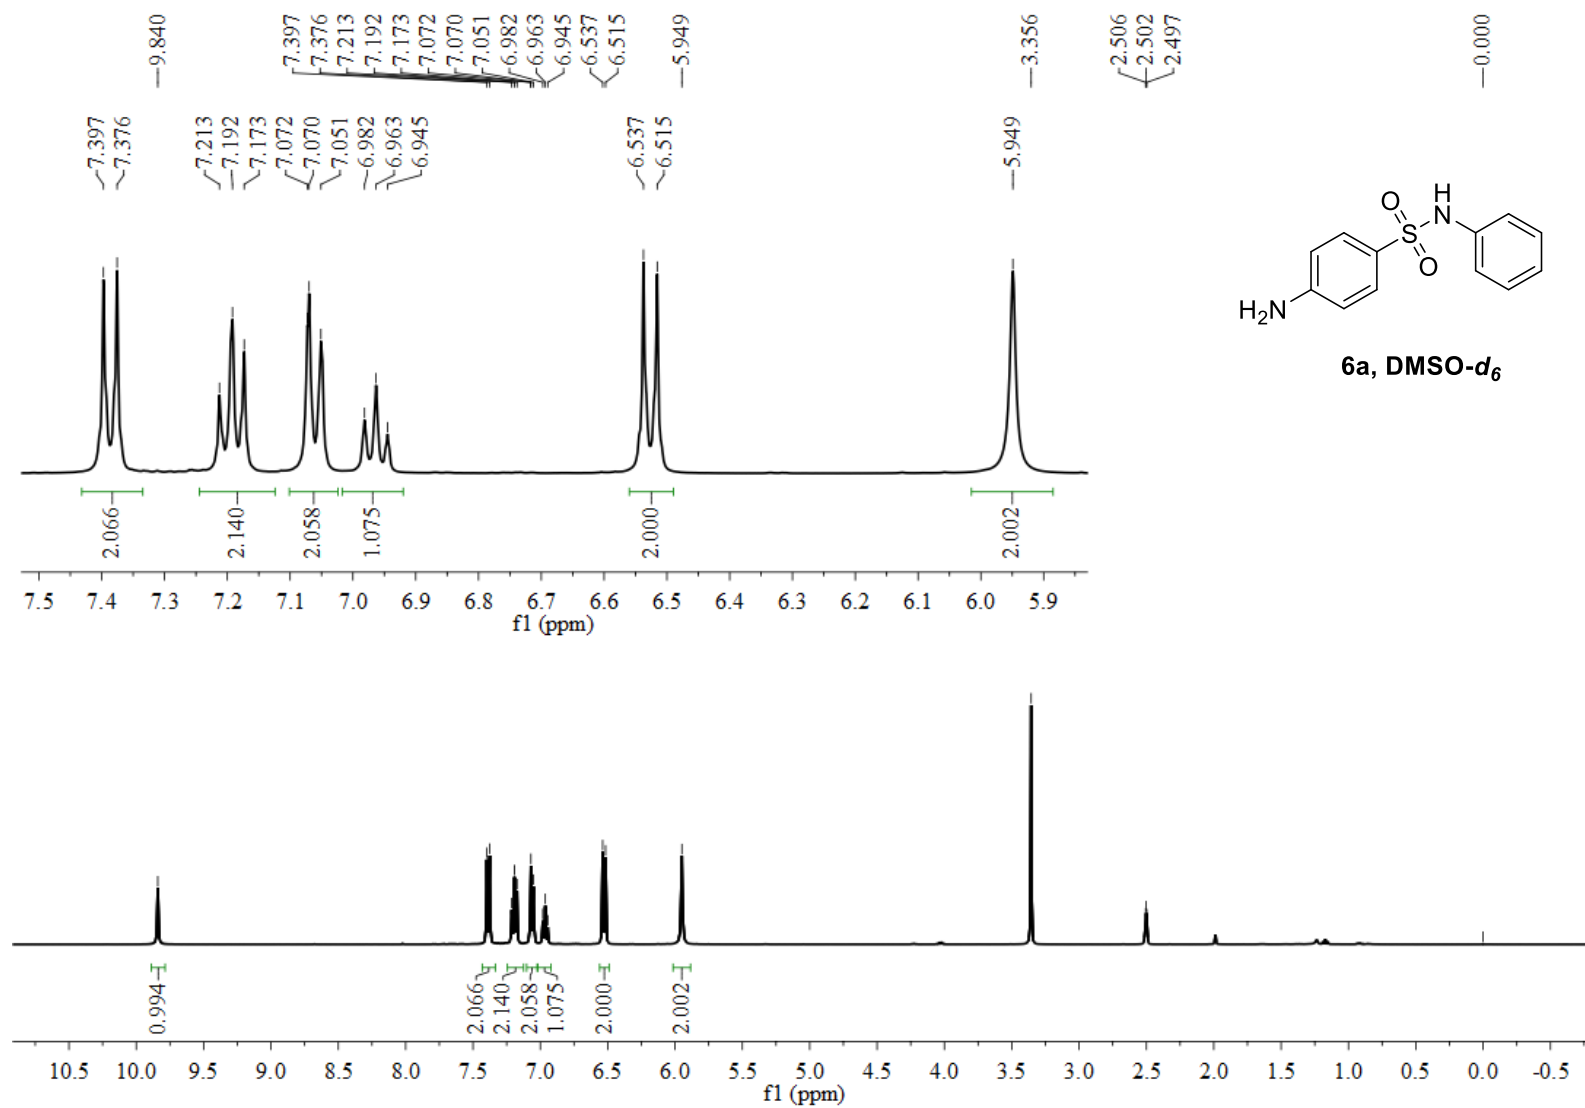

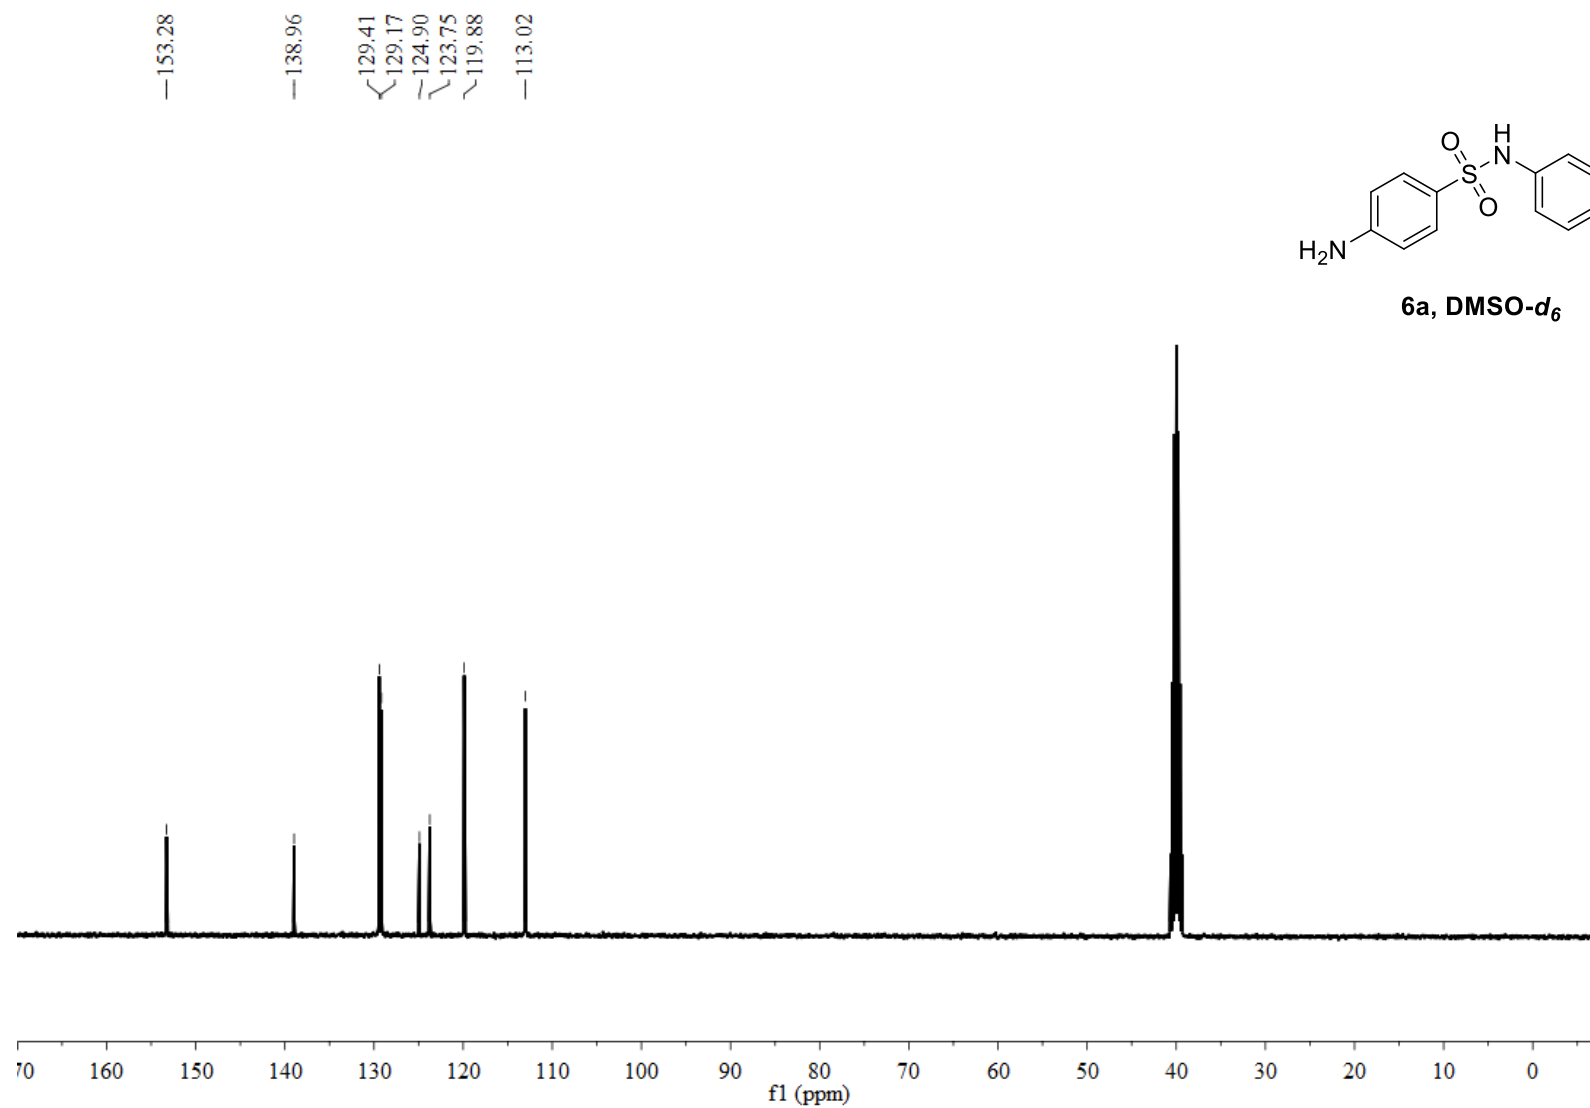

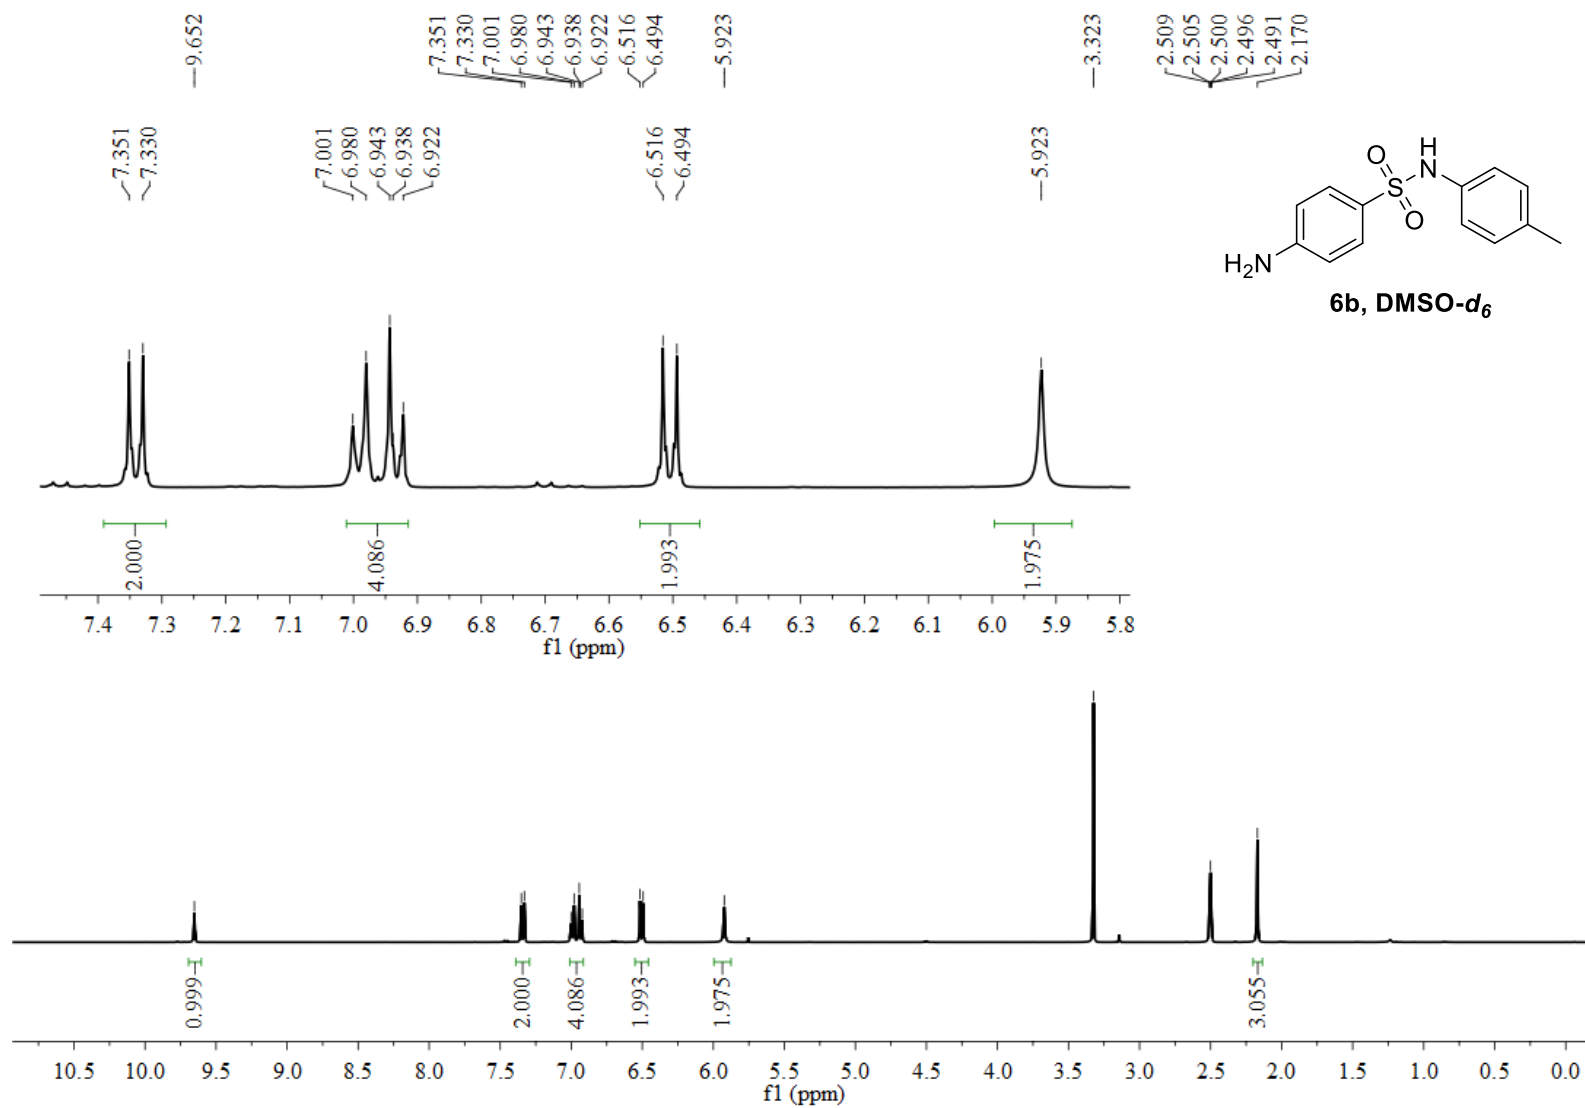

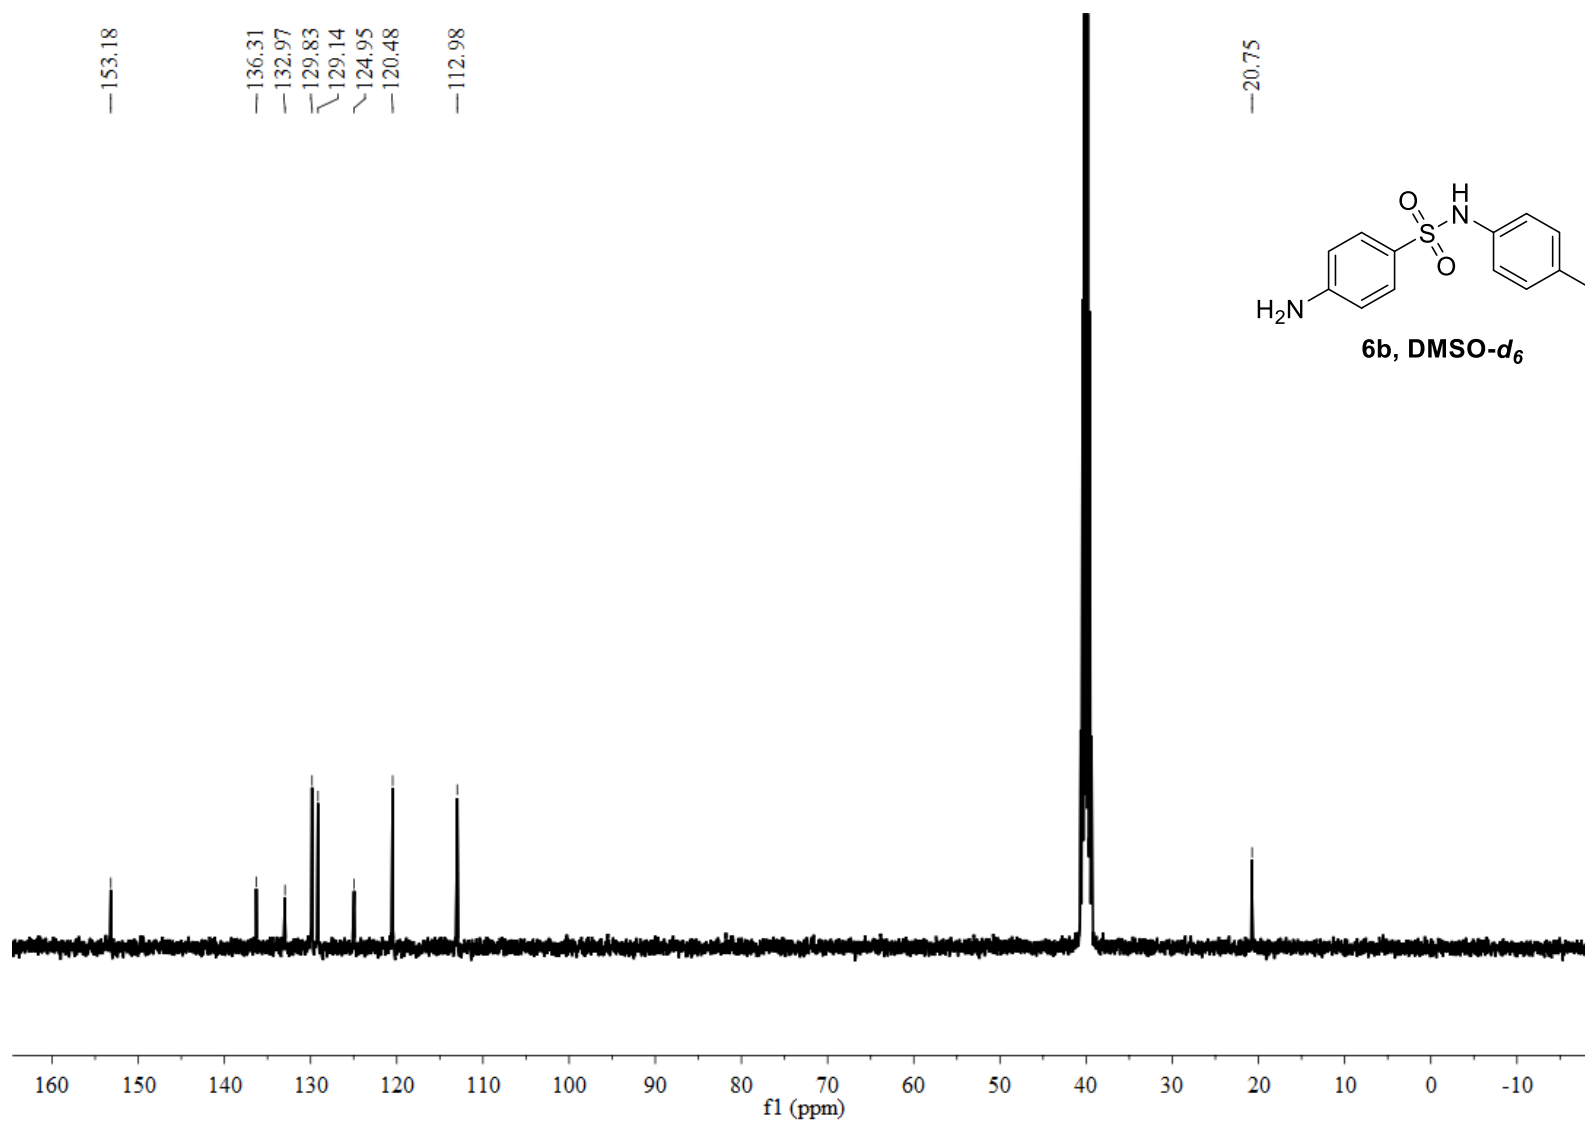

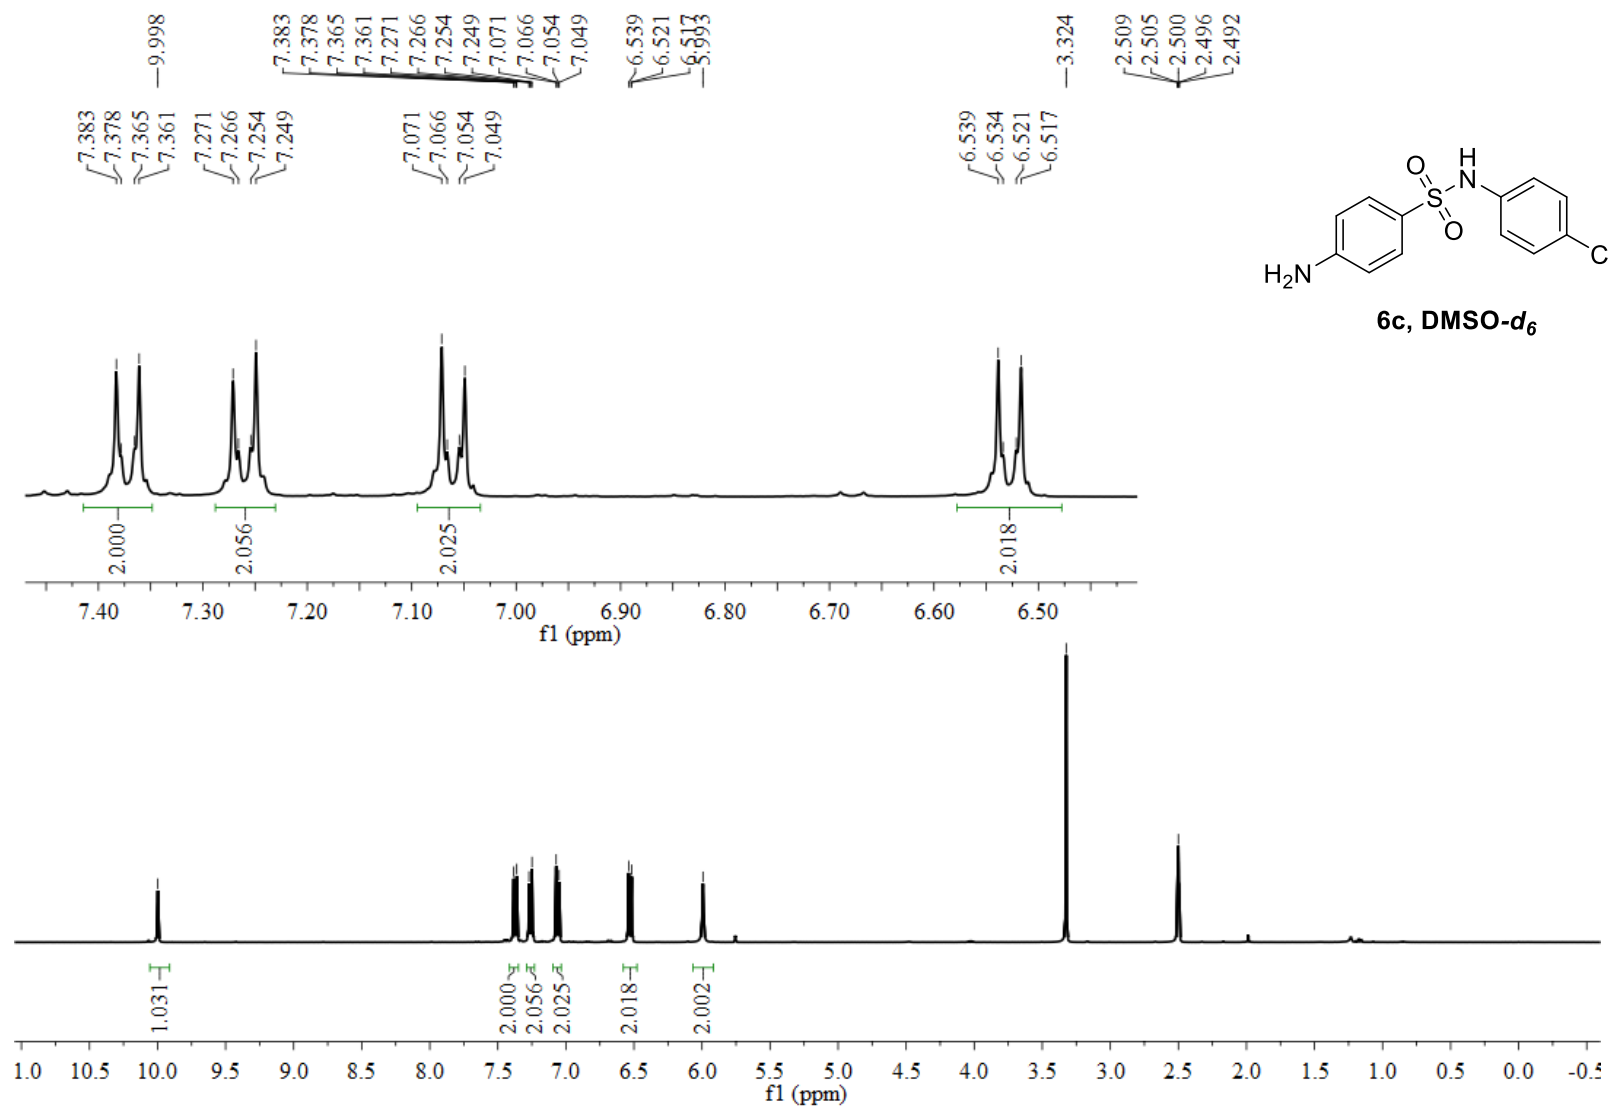

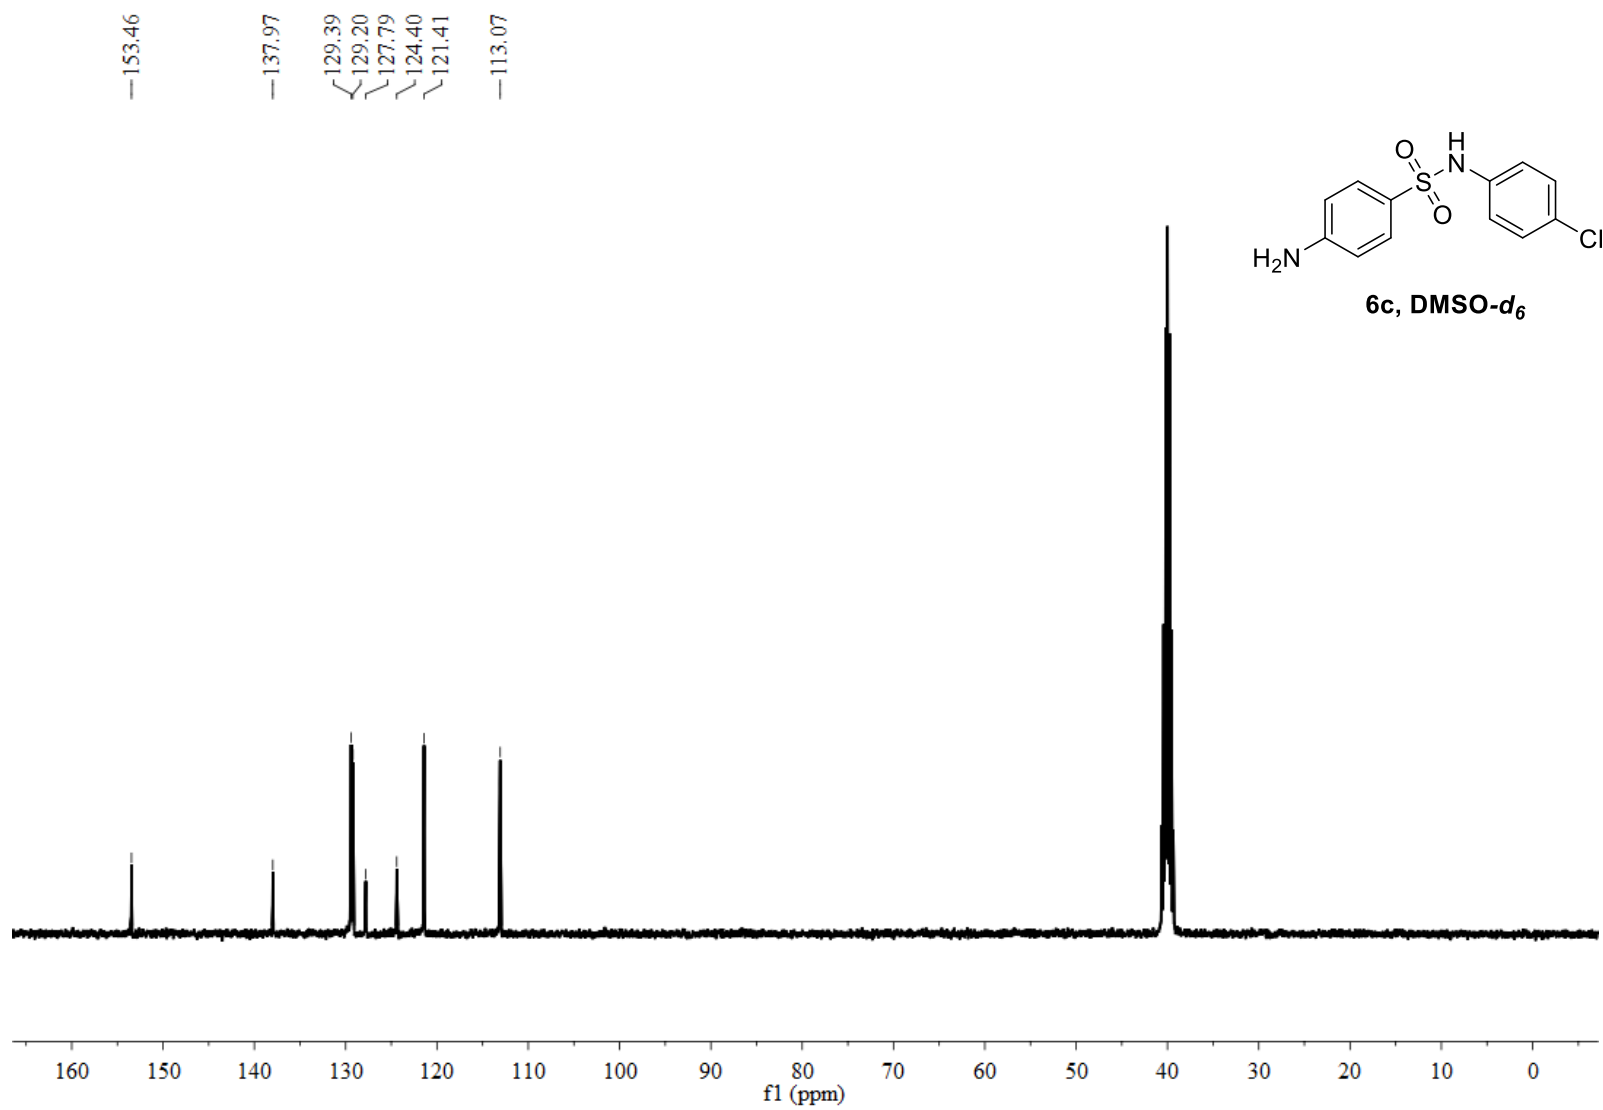

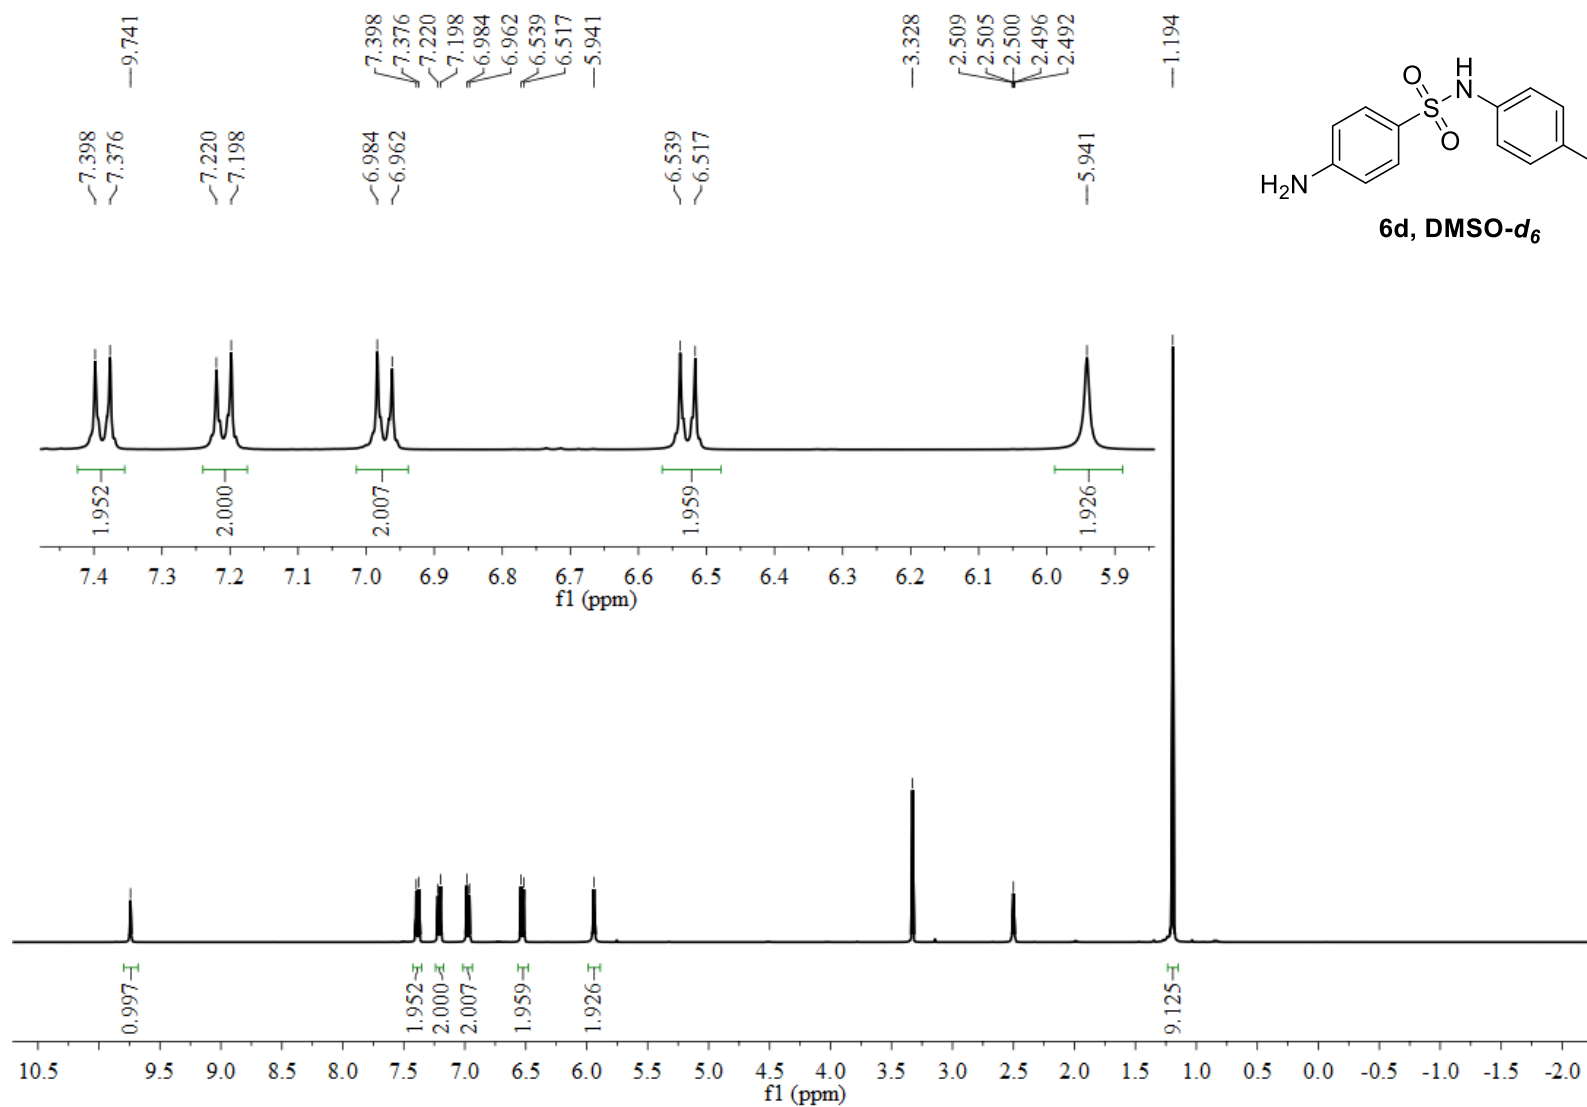



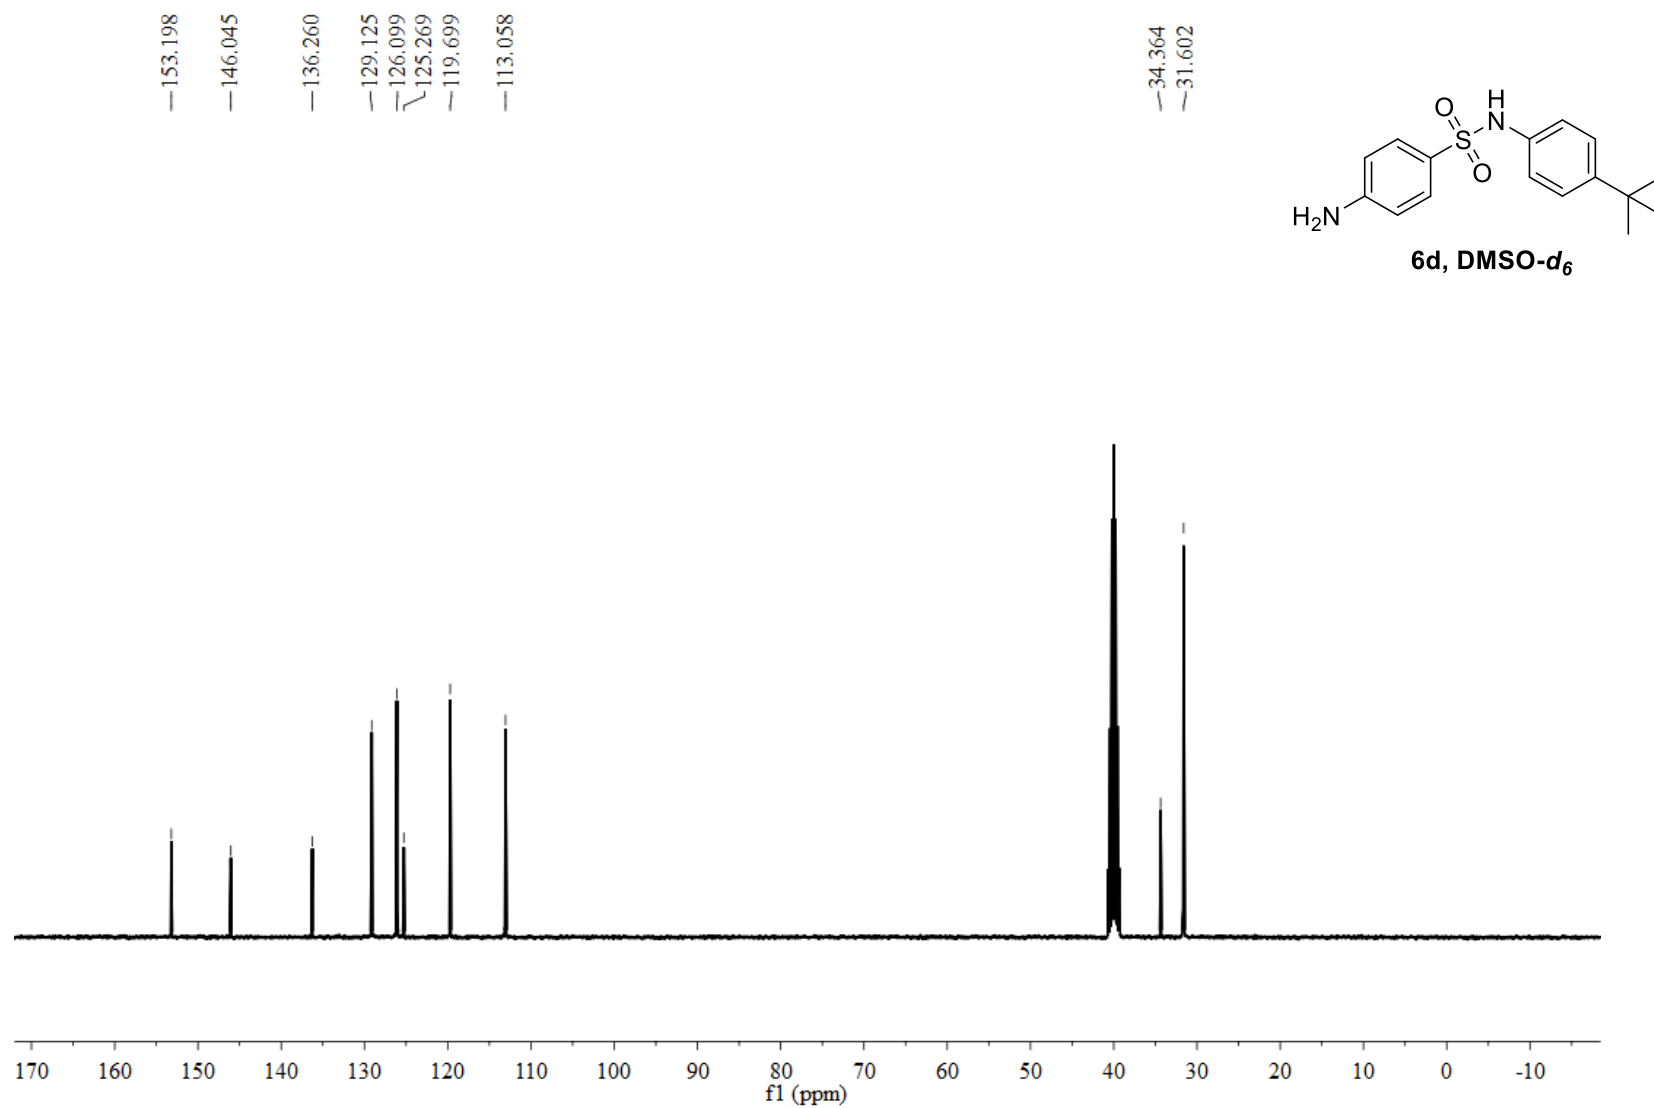

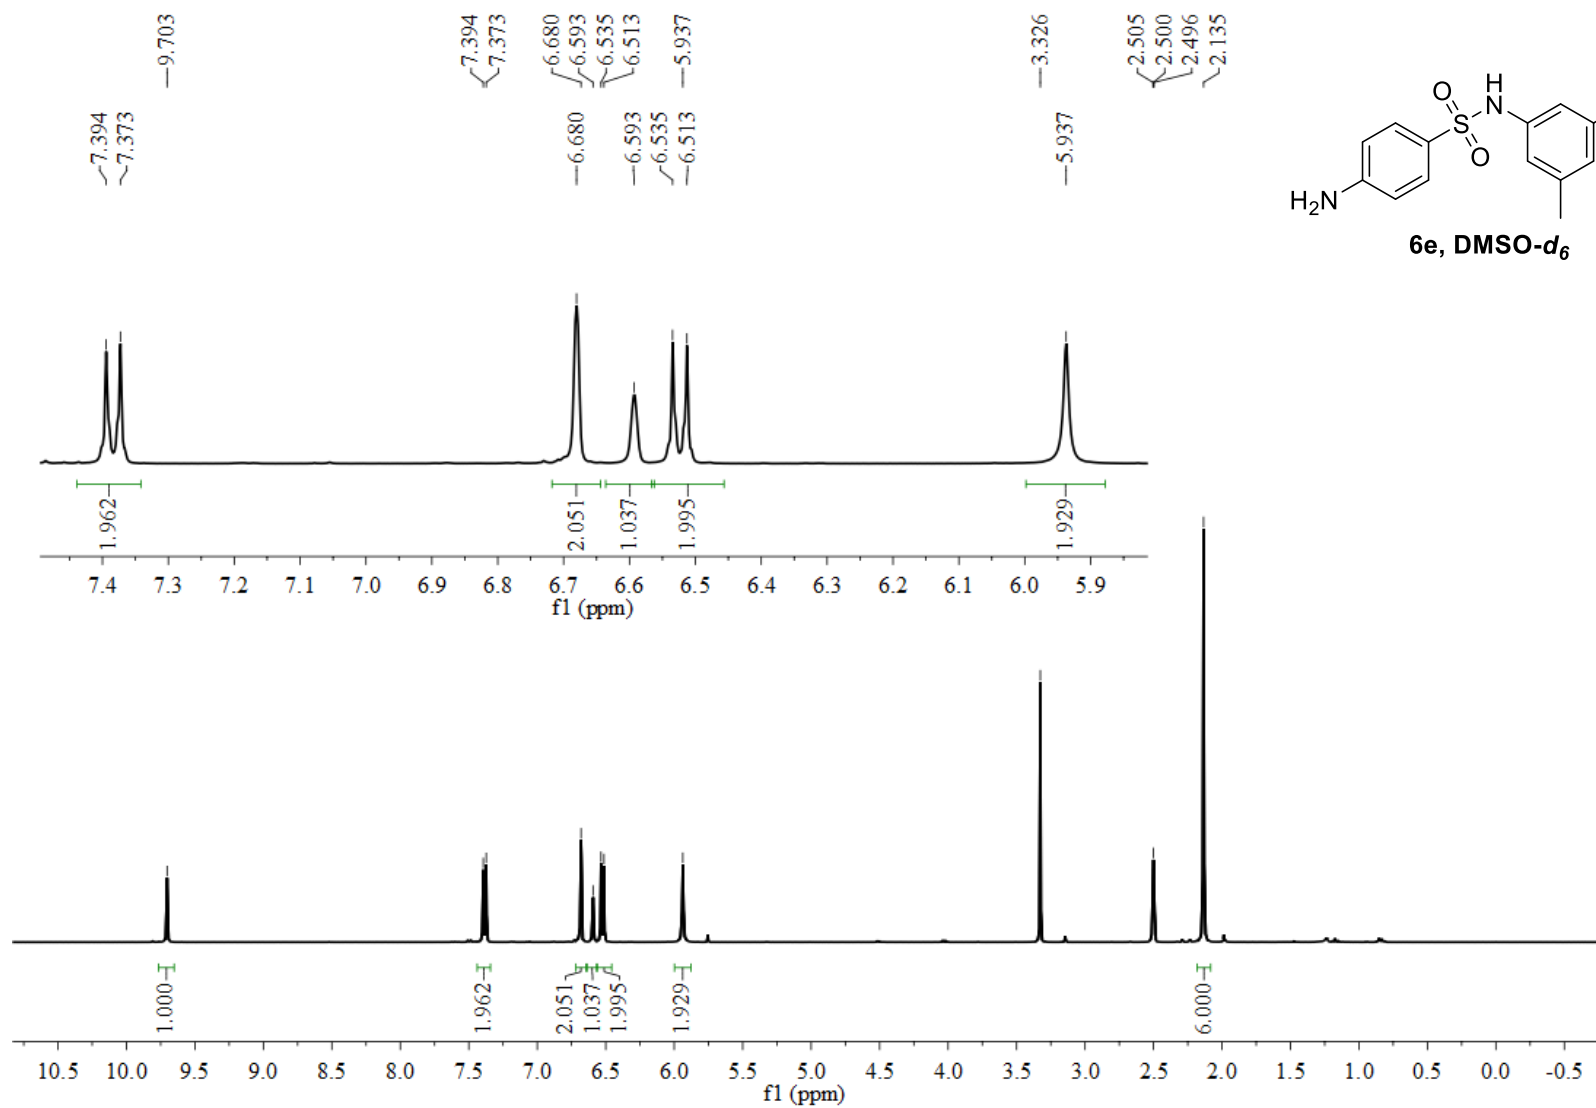

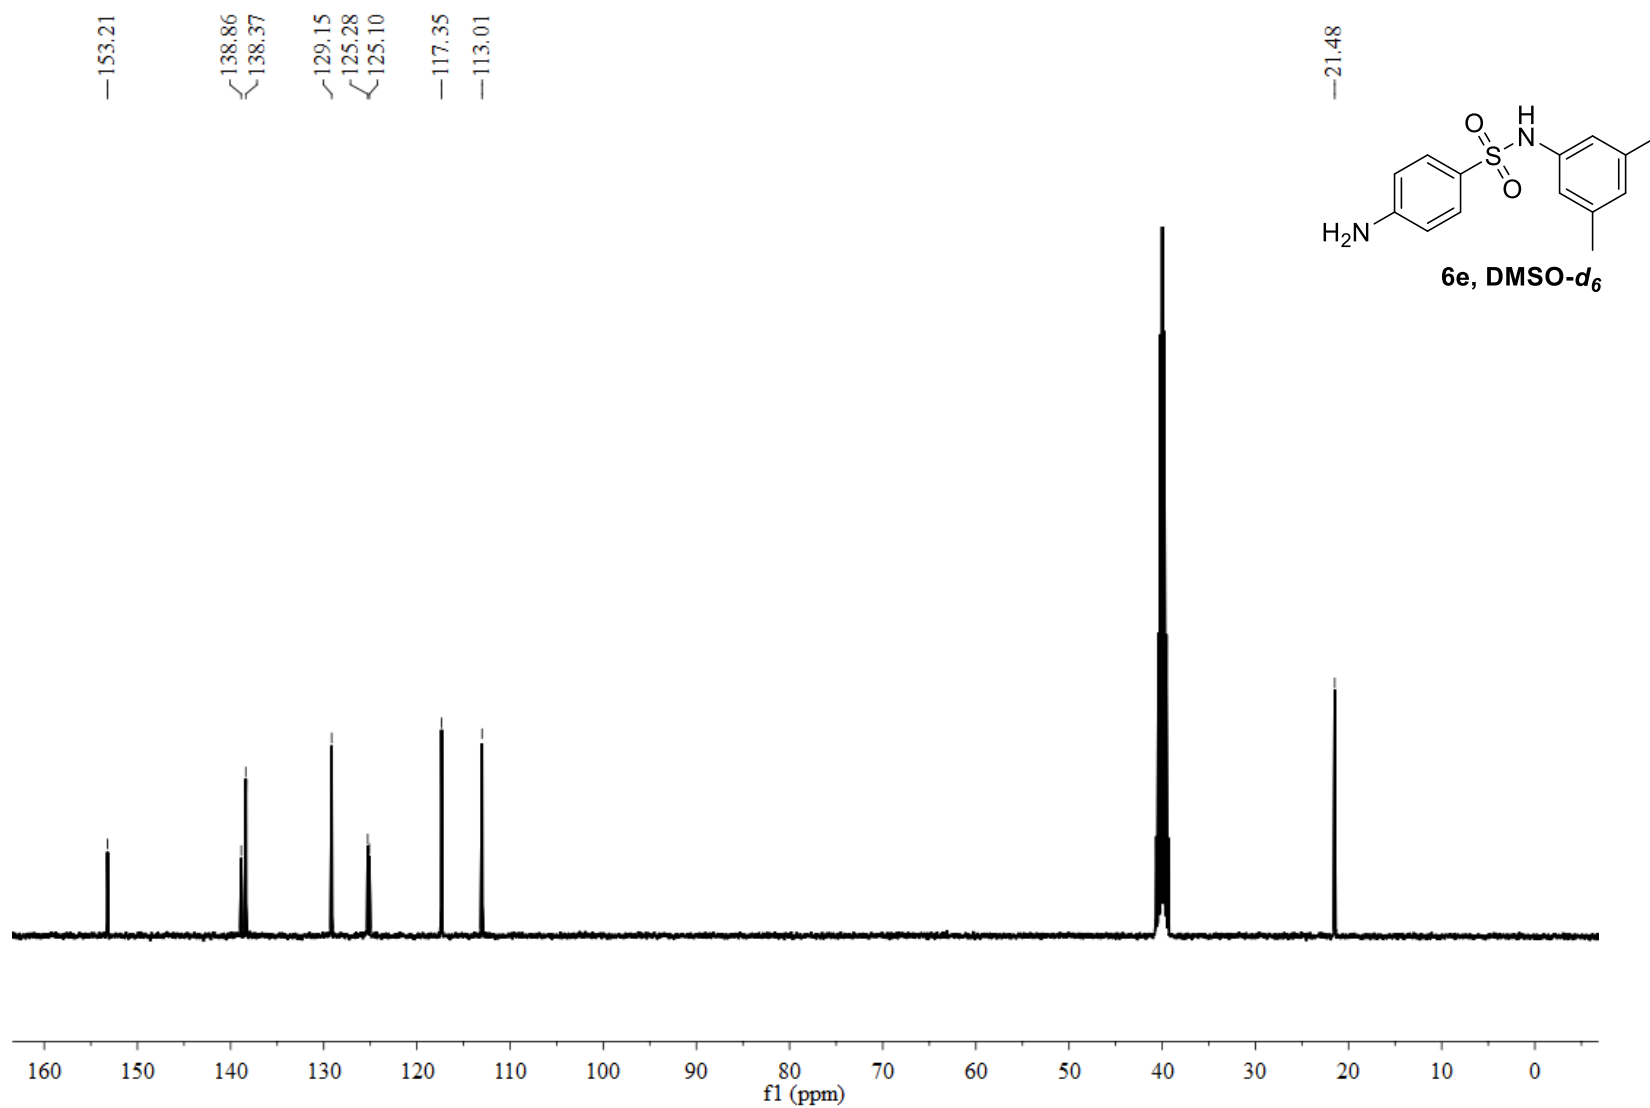

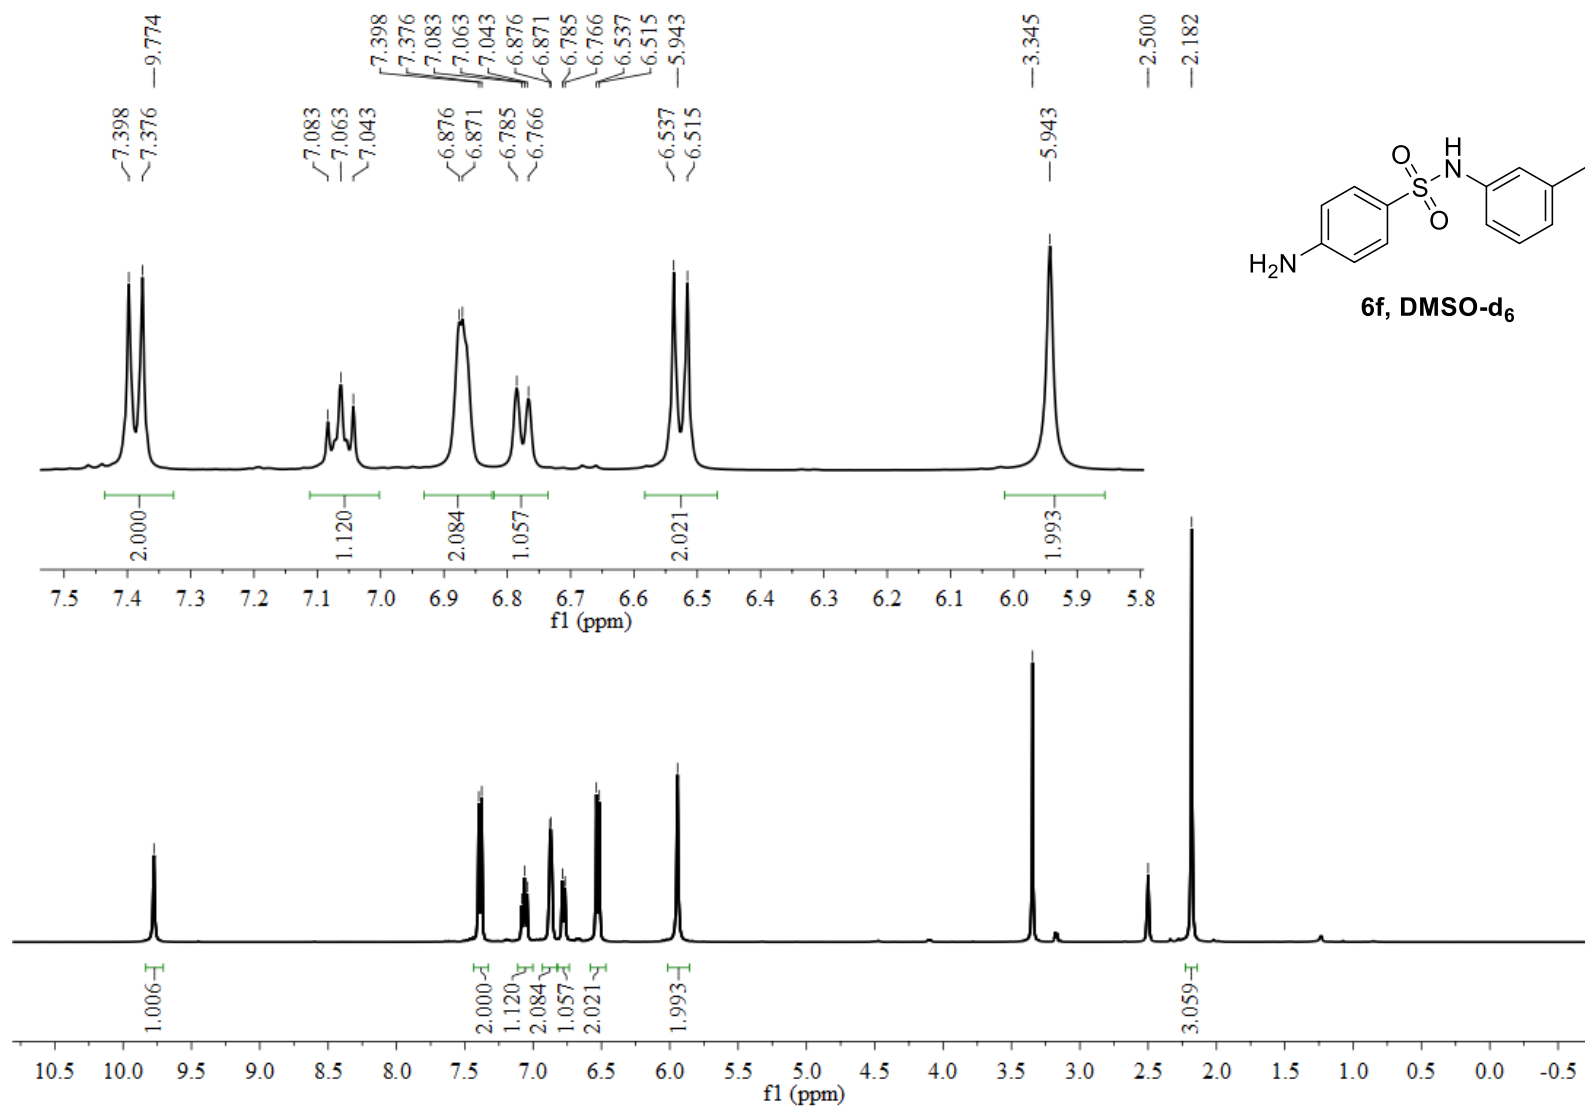

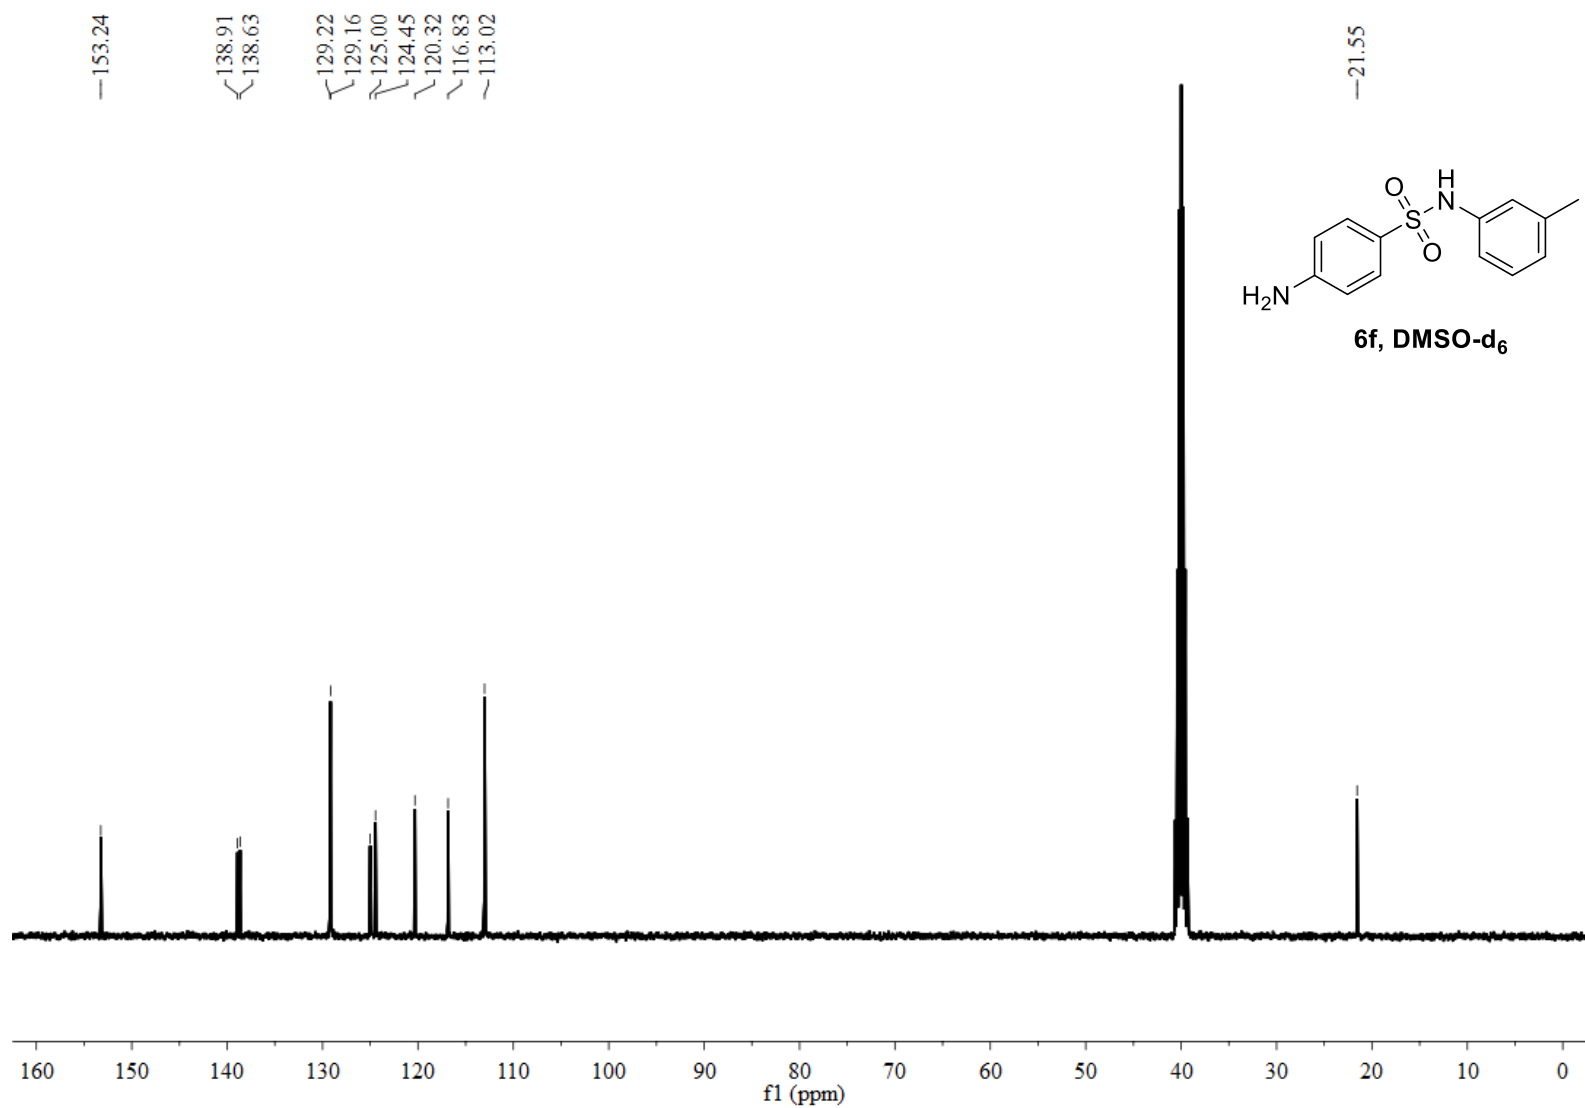

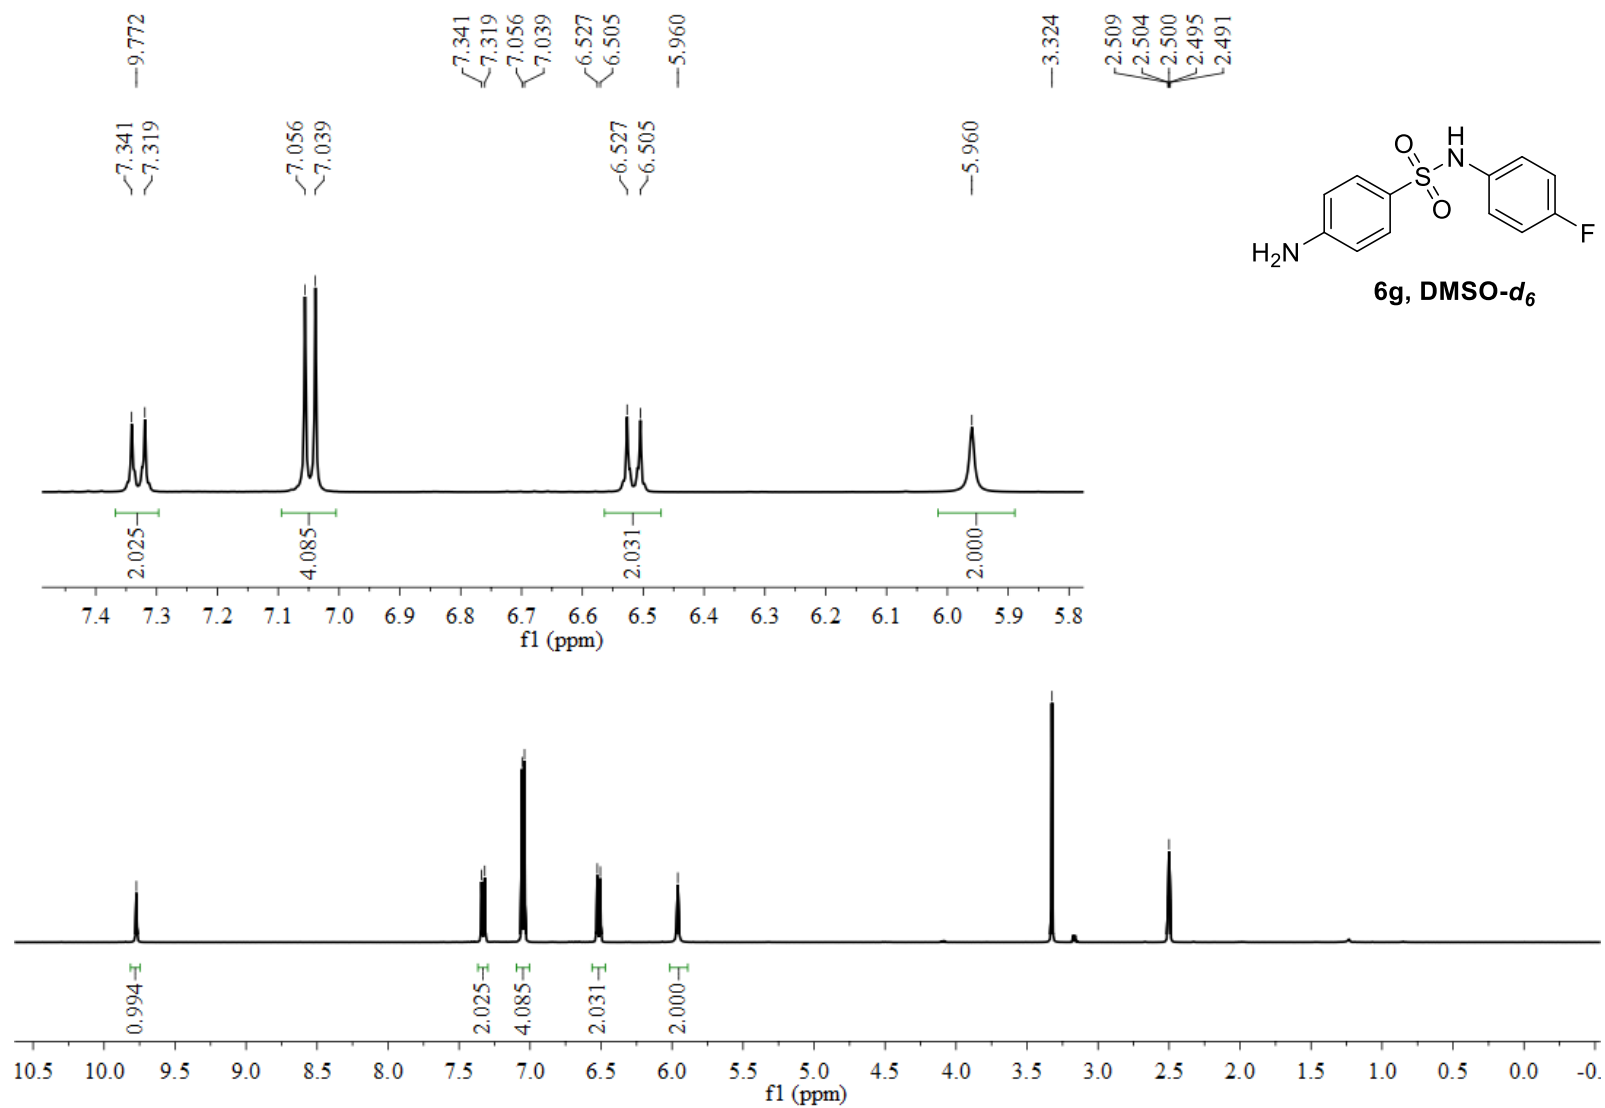

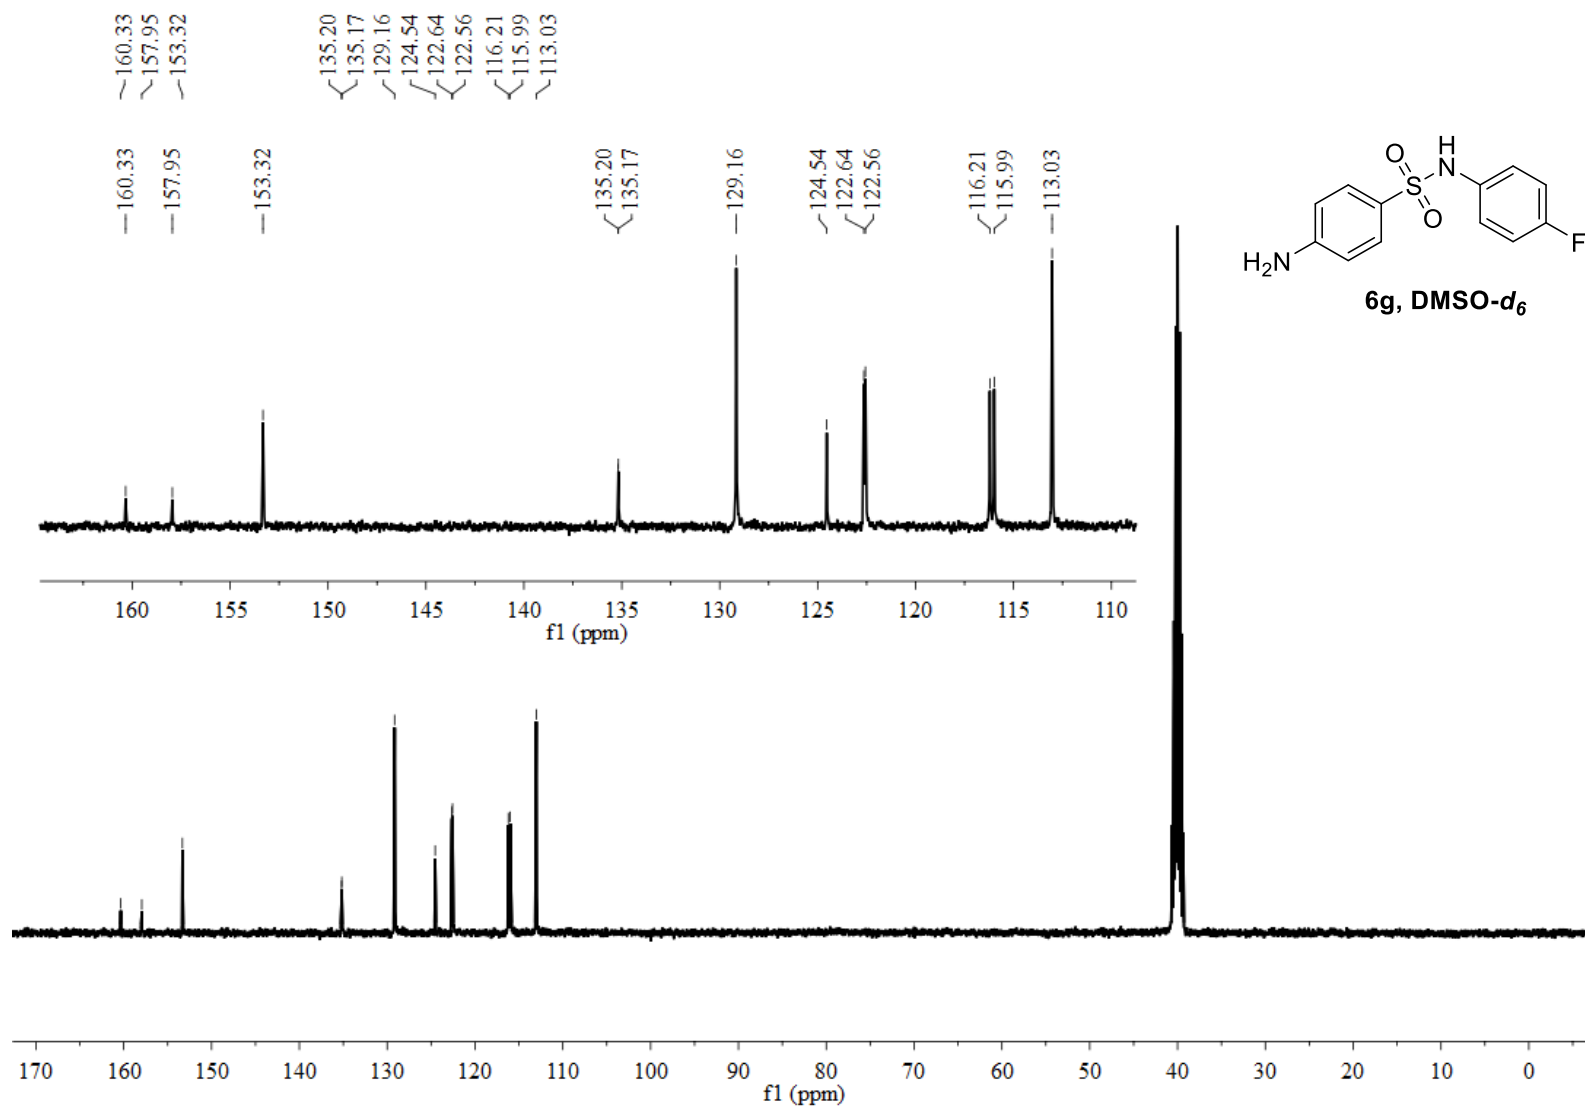

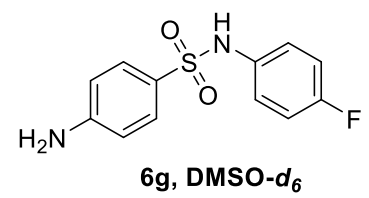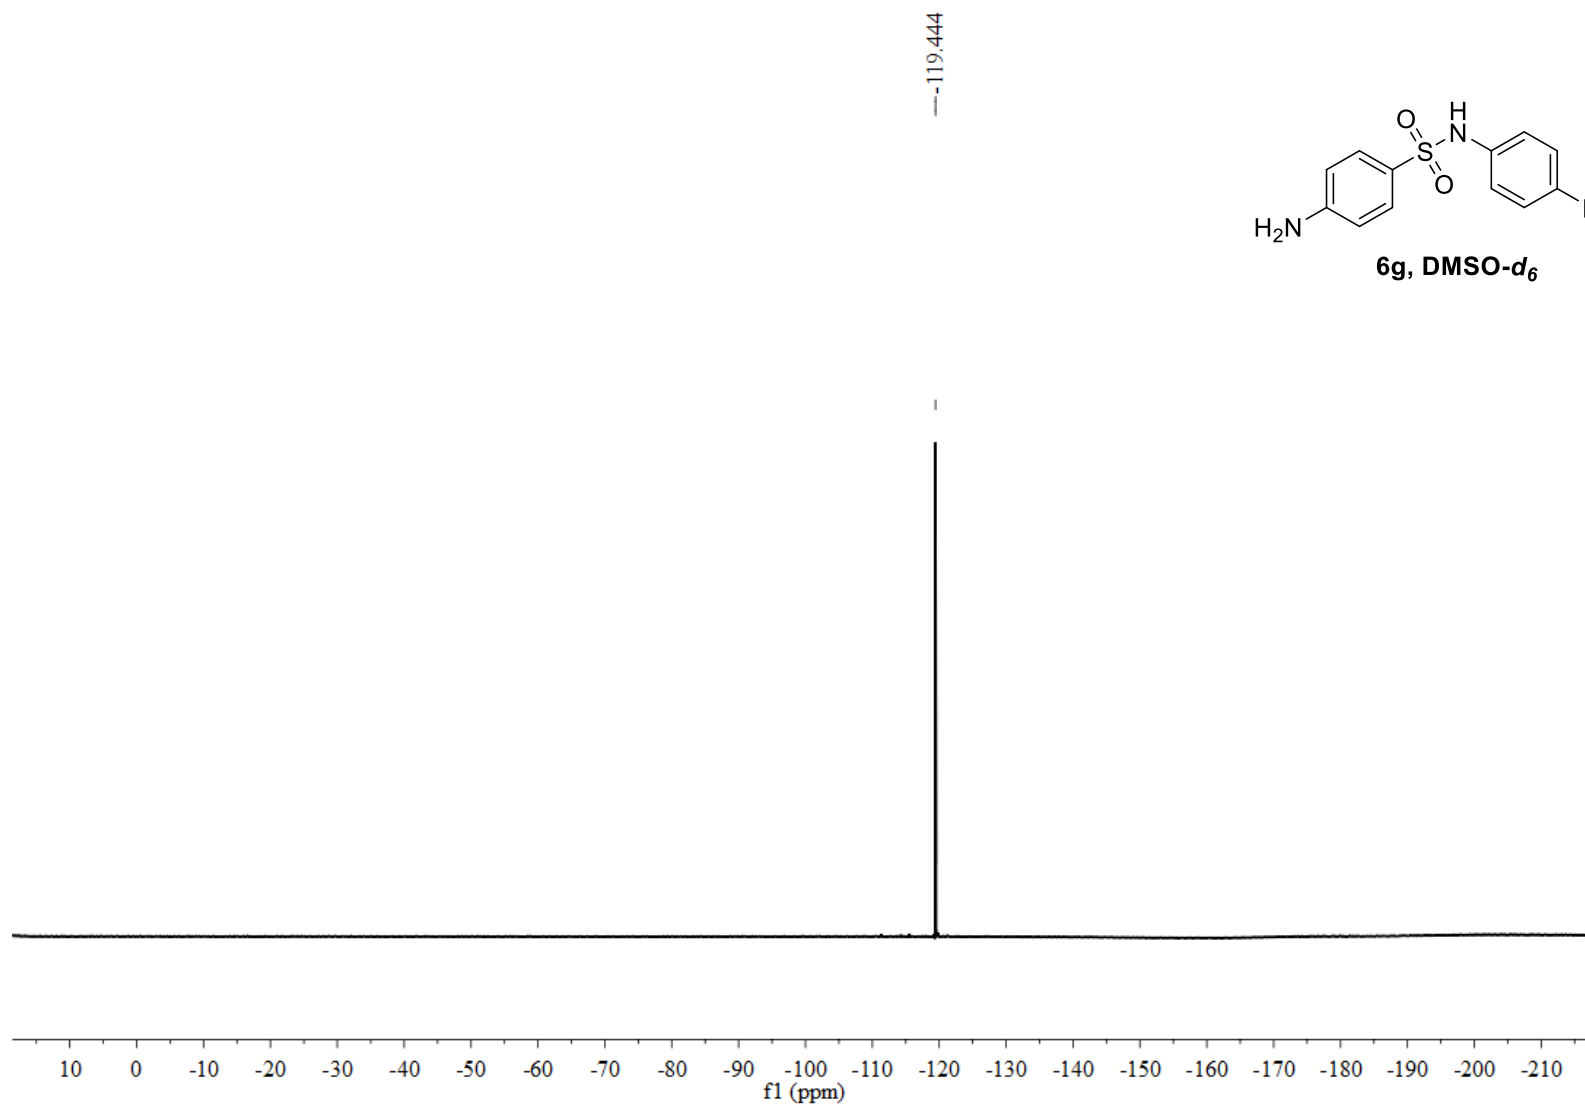



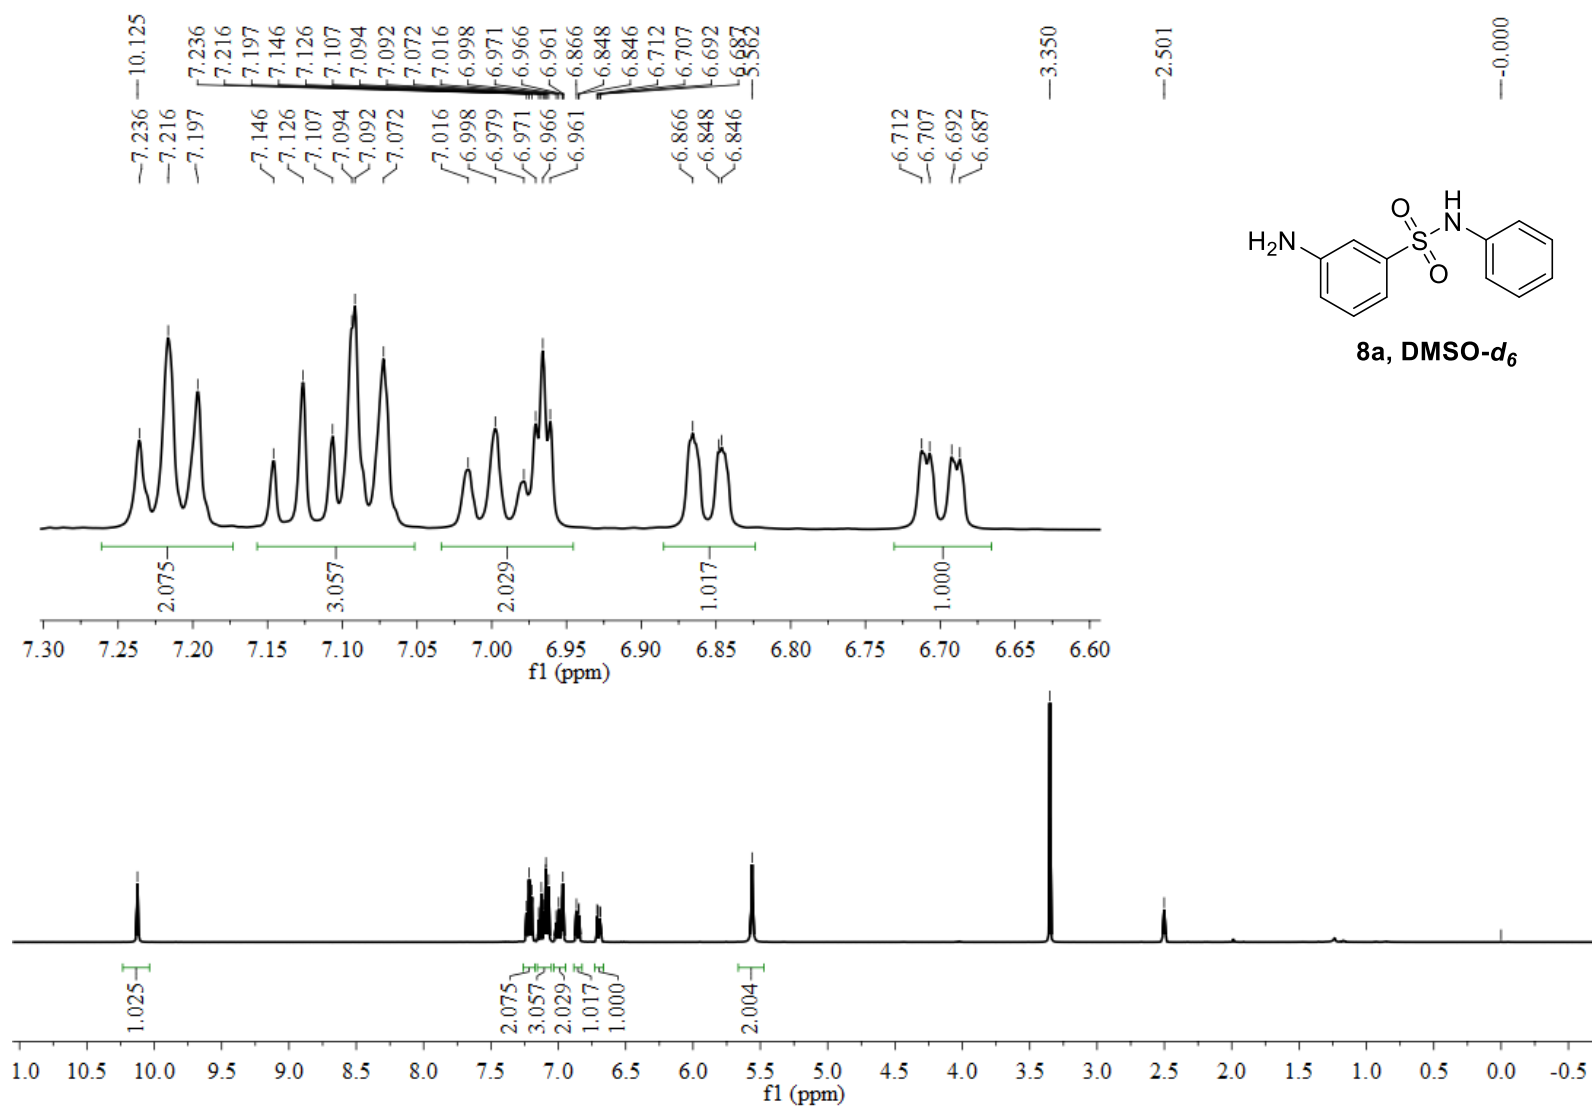

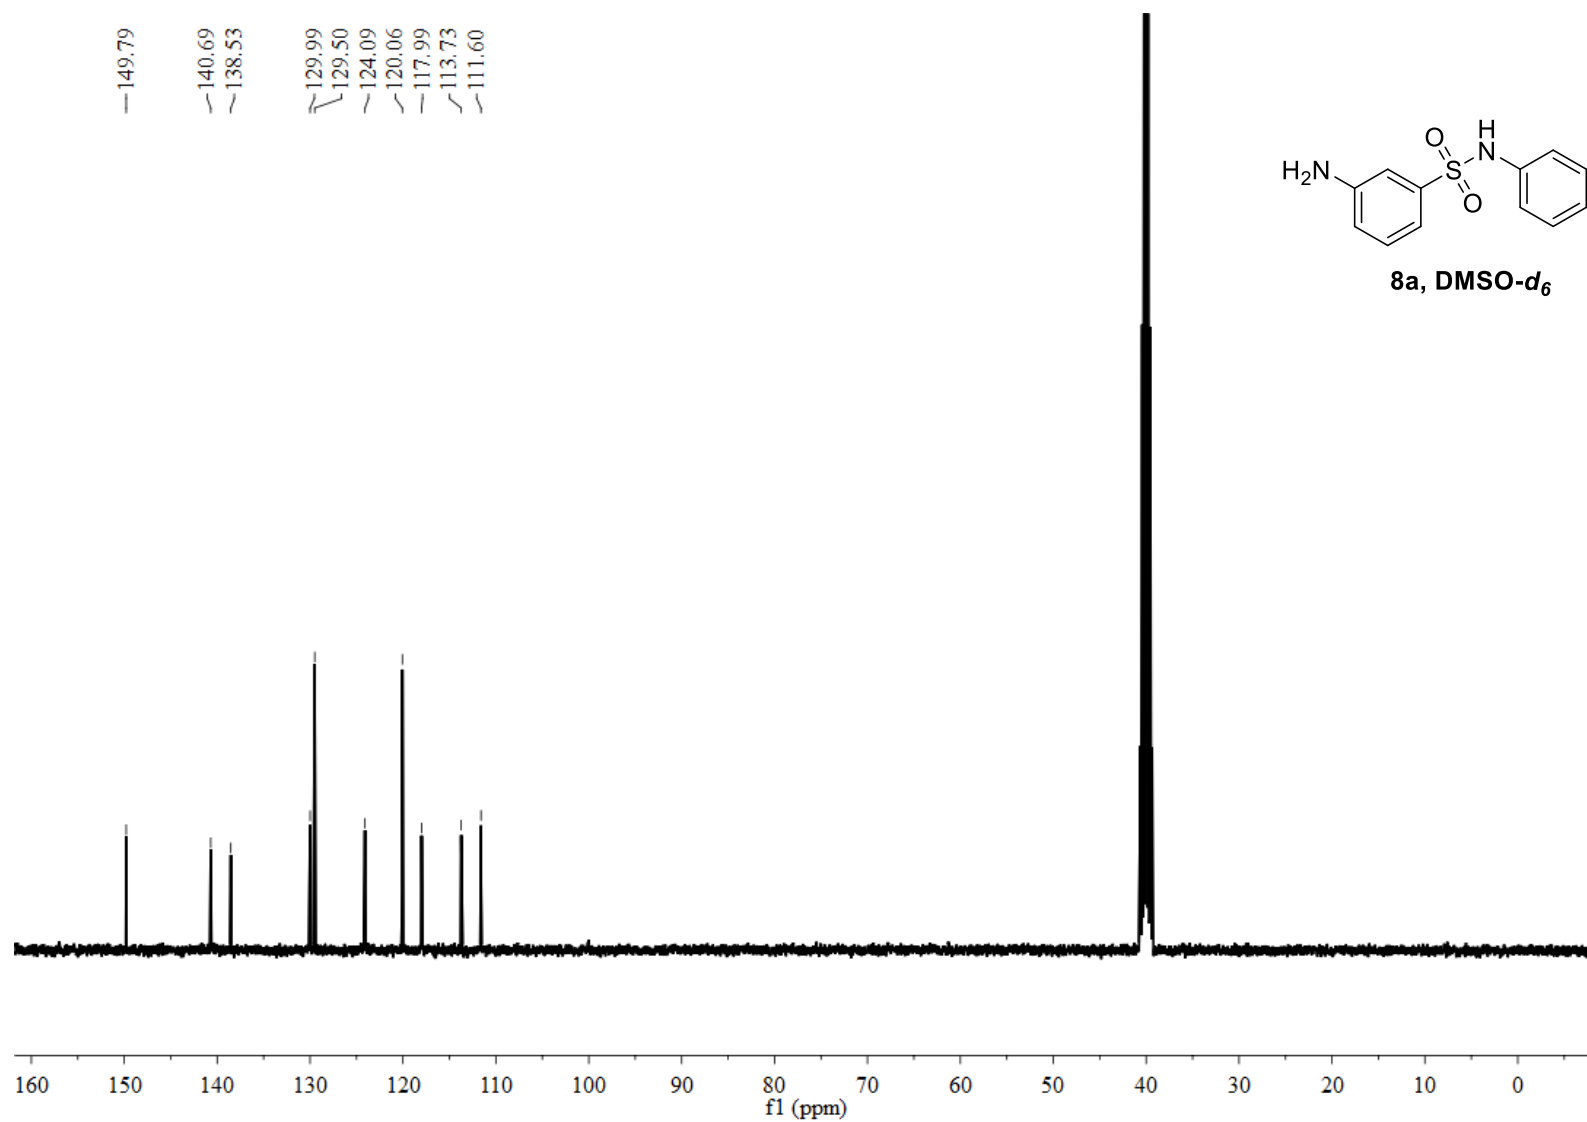

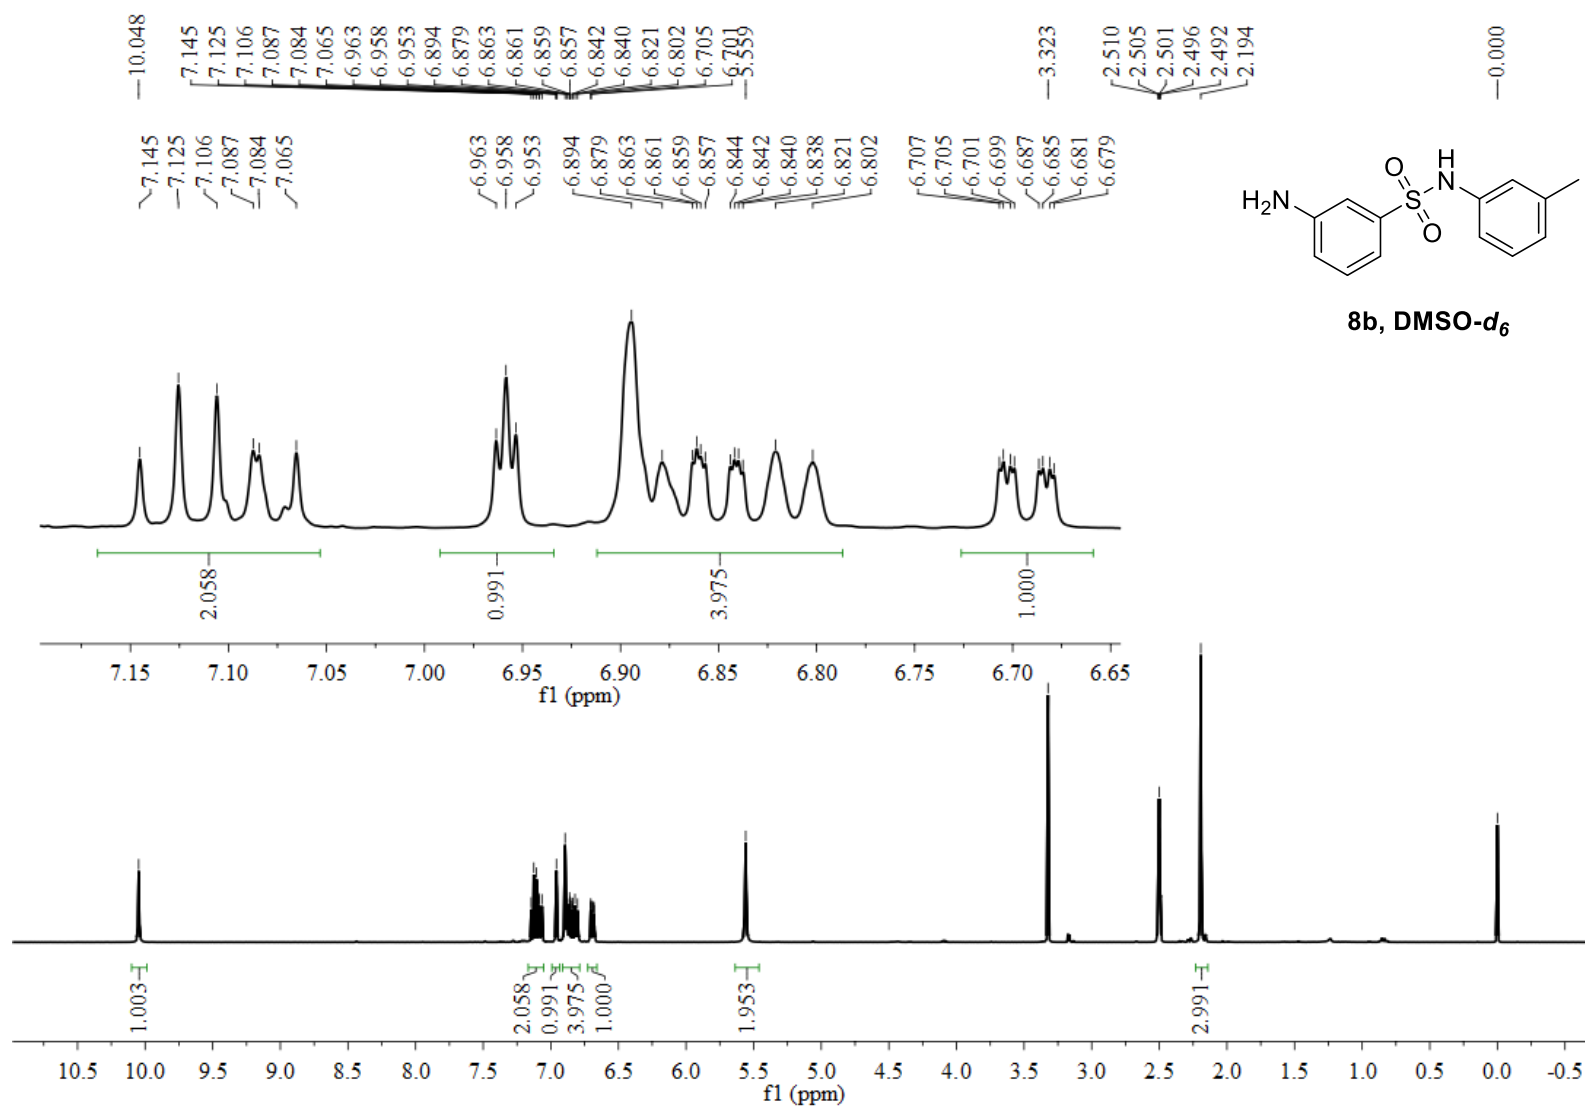

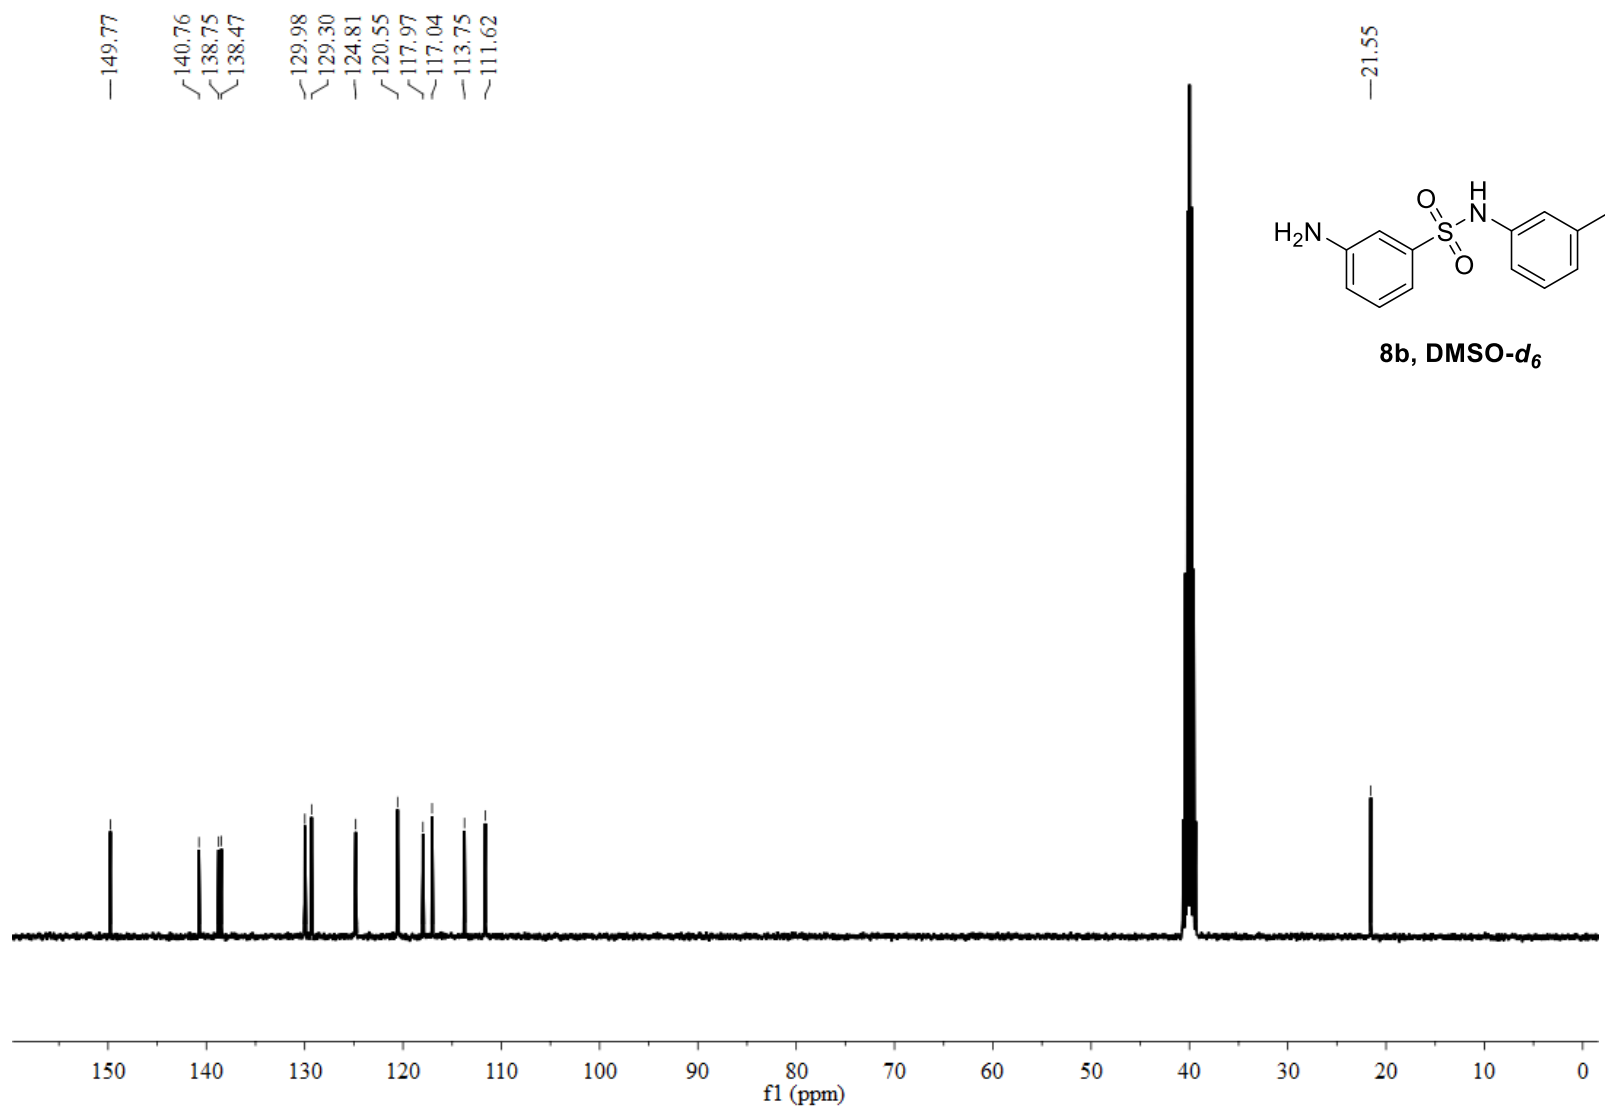

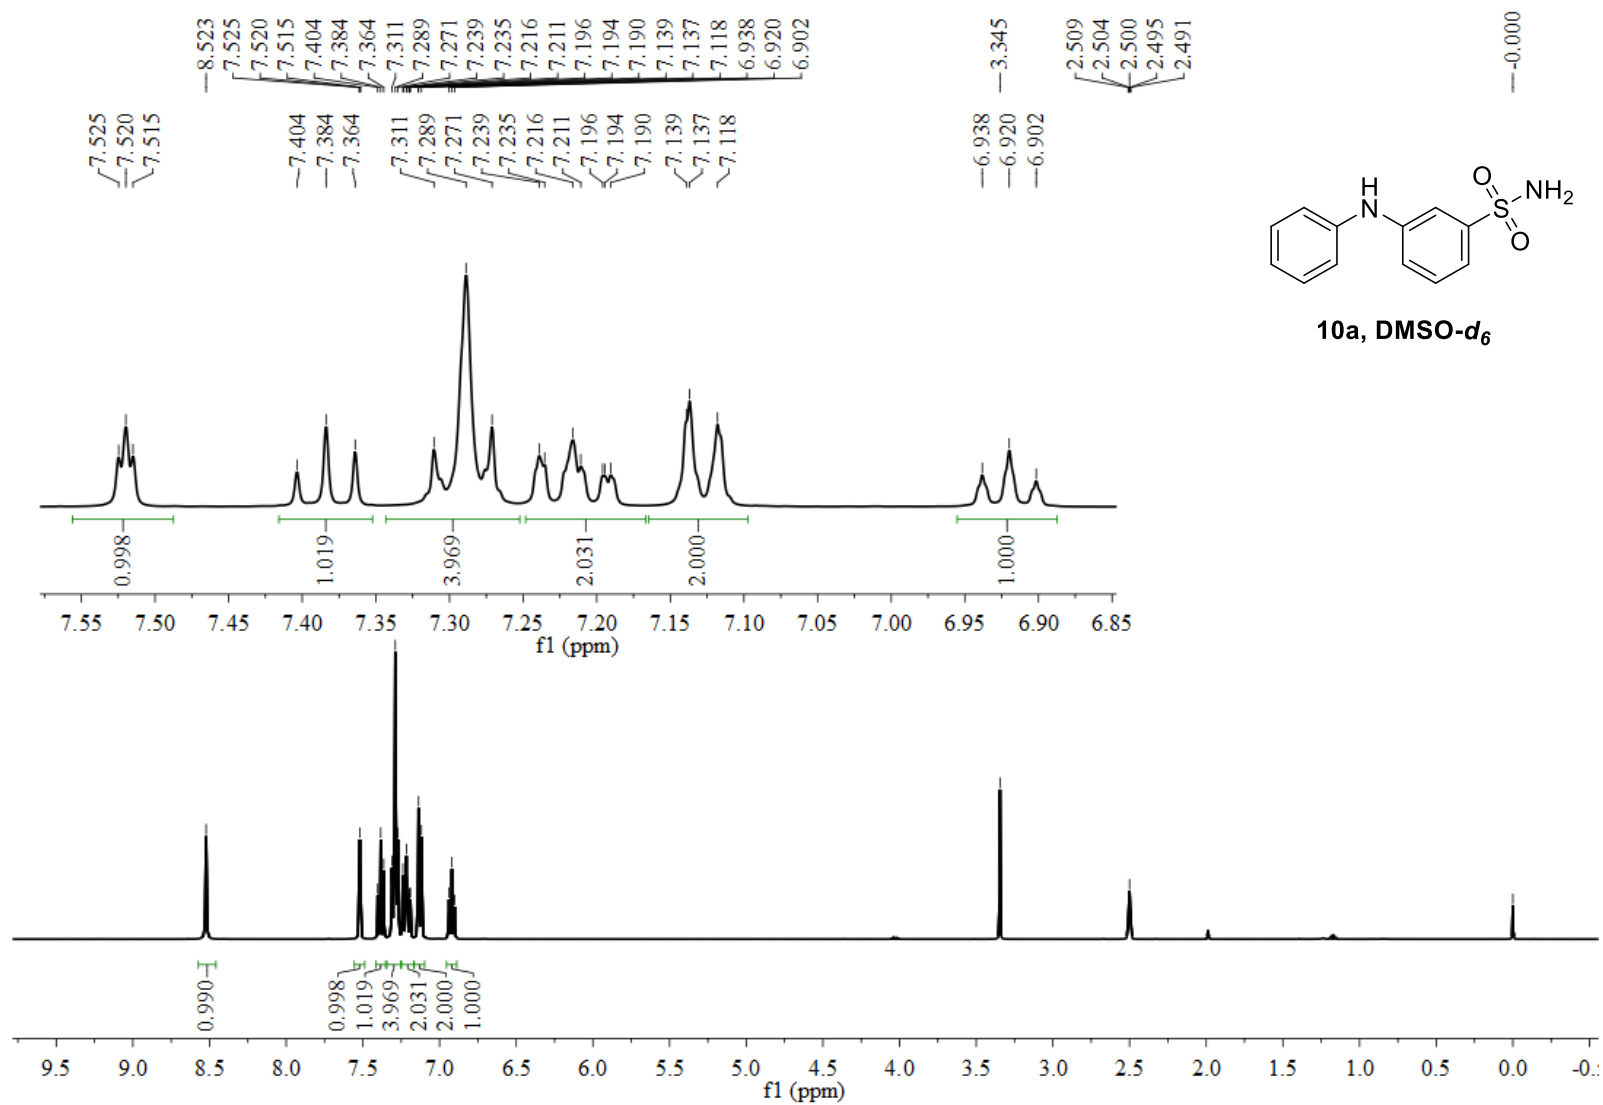

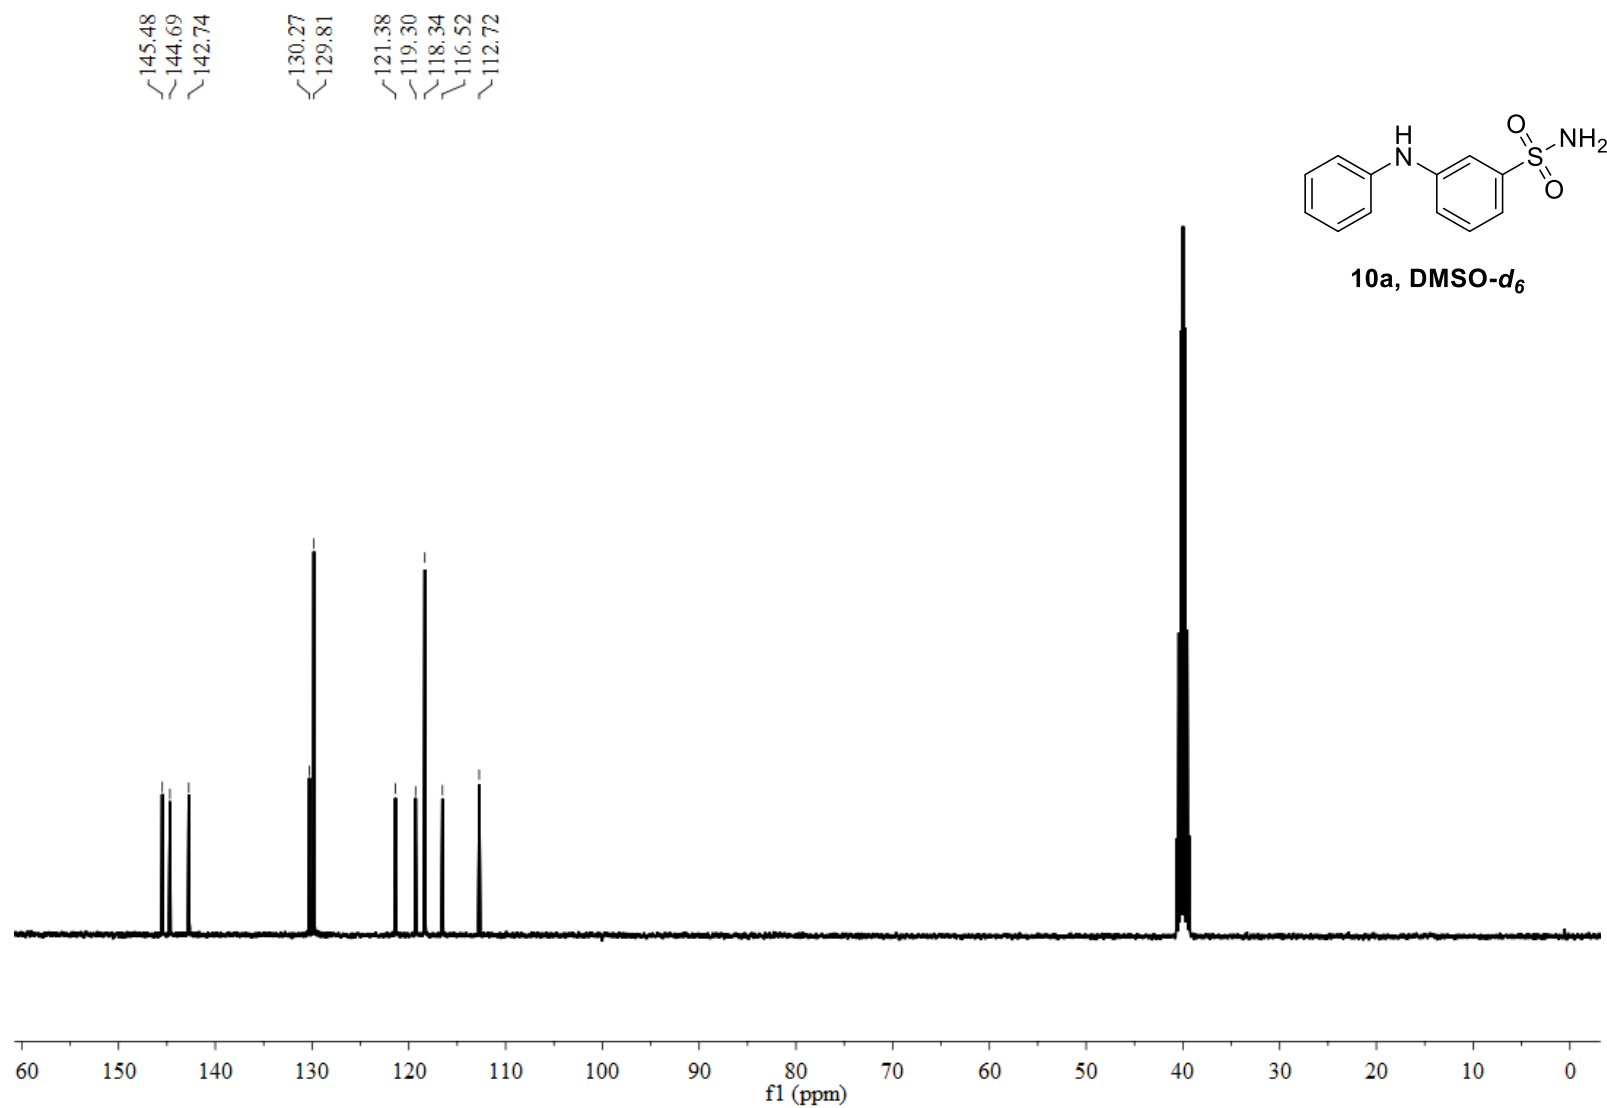

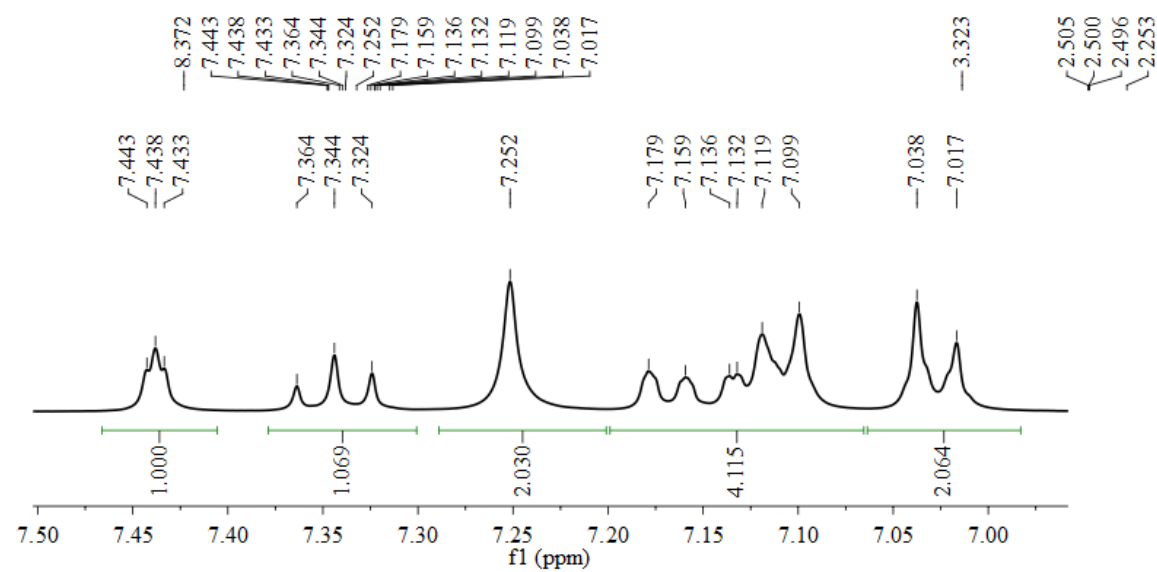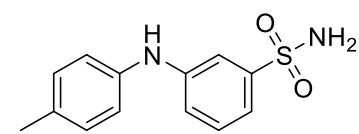

**10b, DMSO- $d_6$**

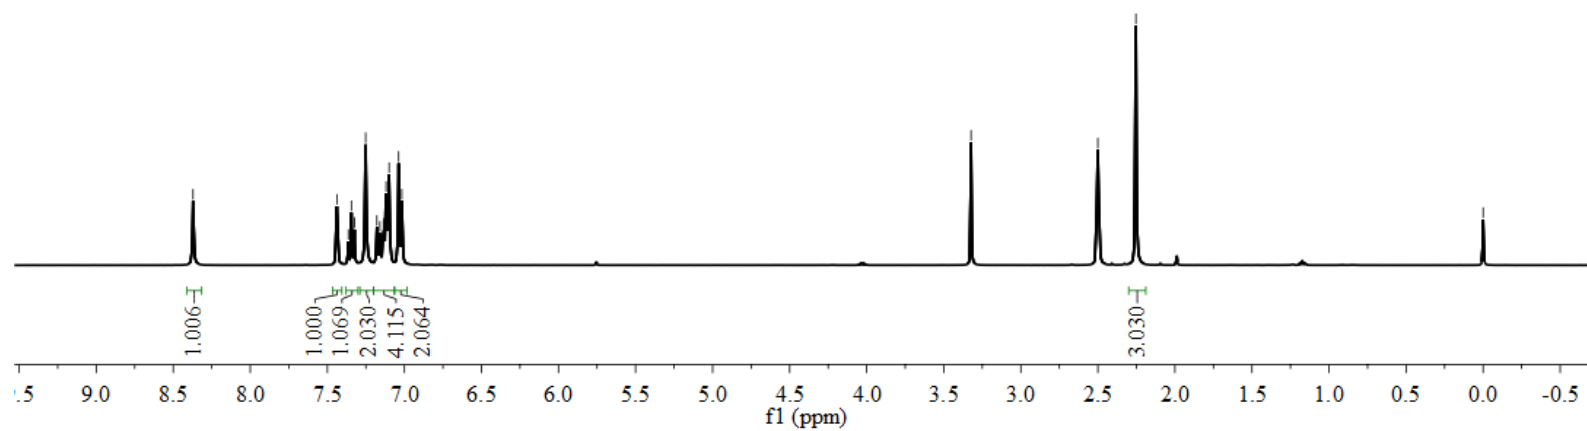

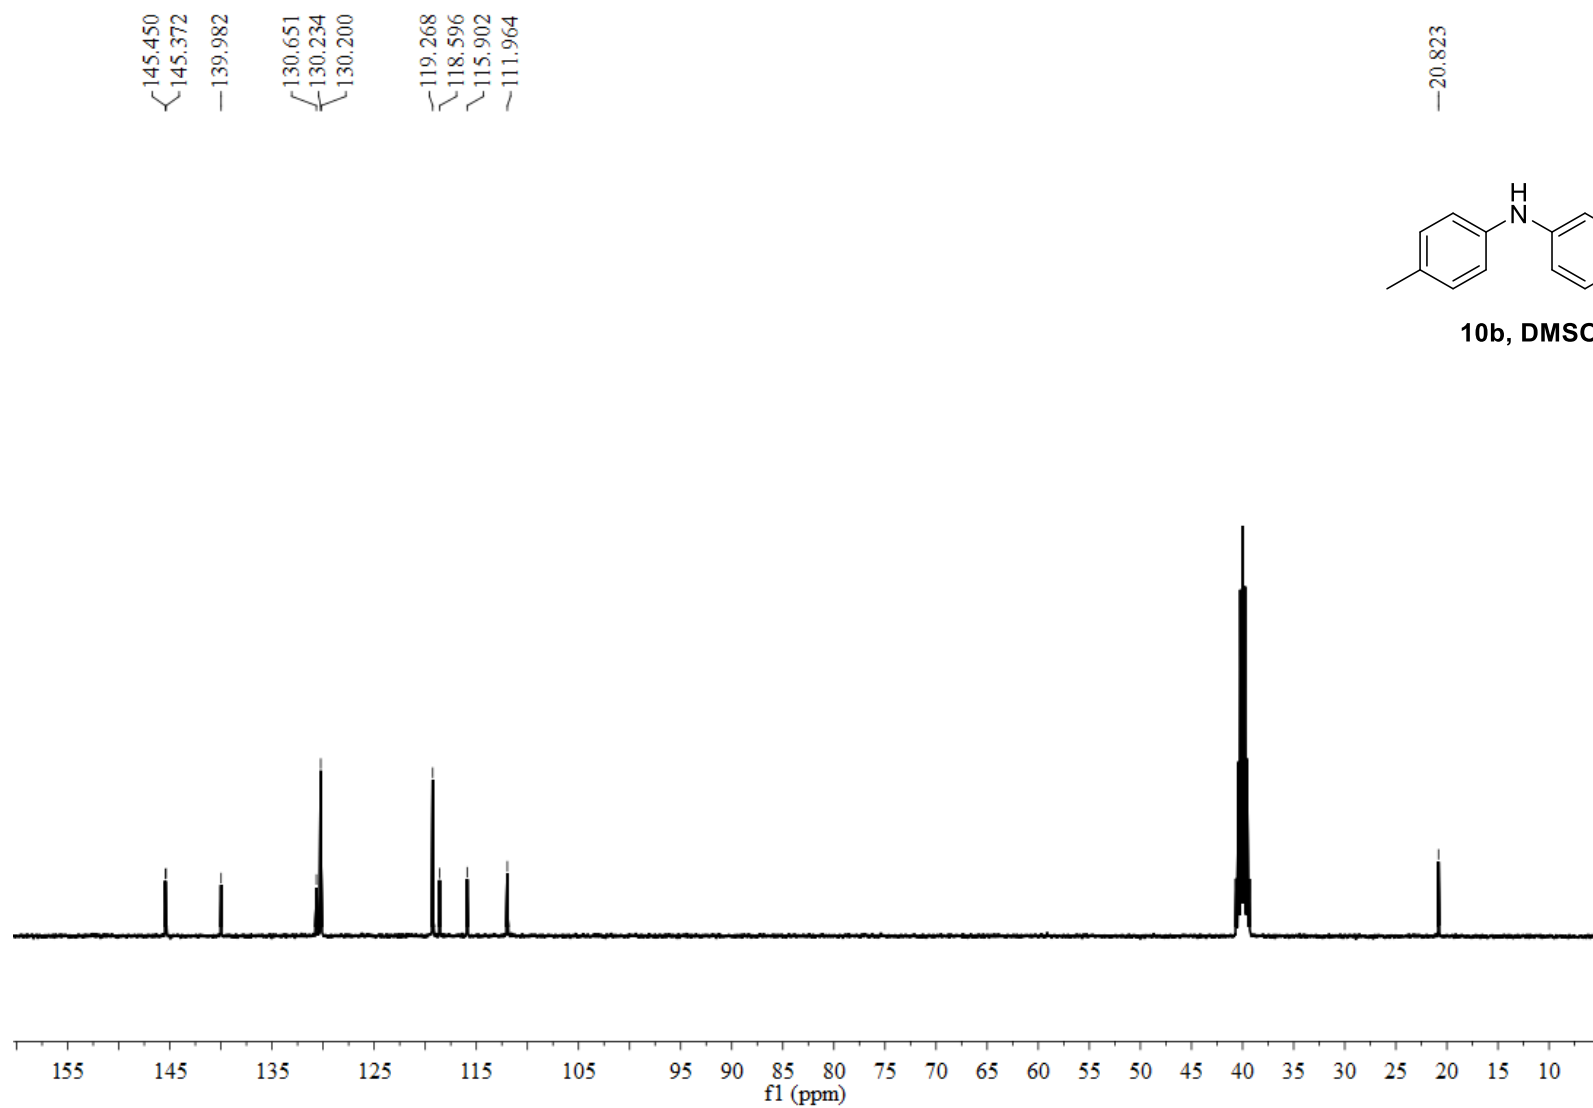



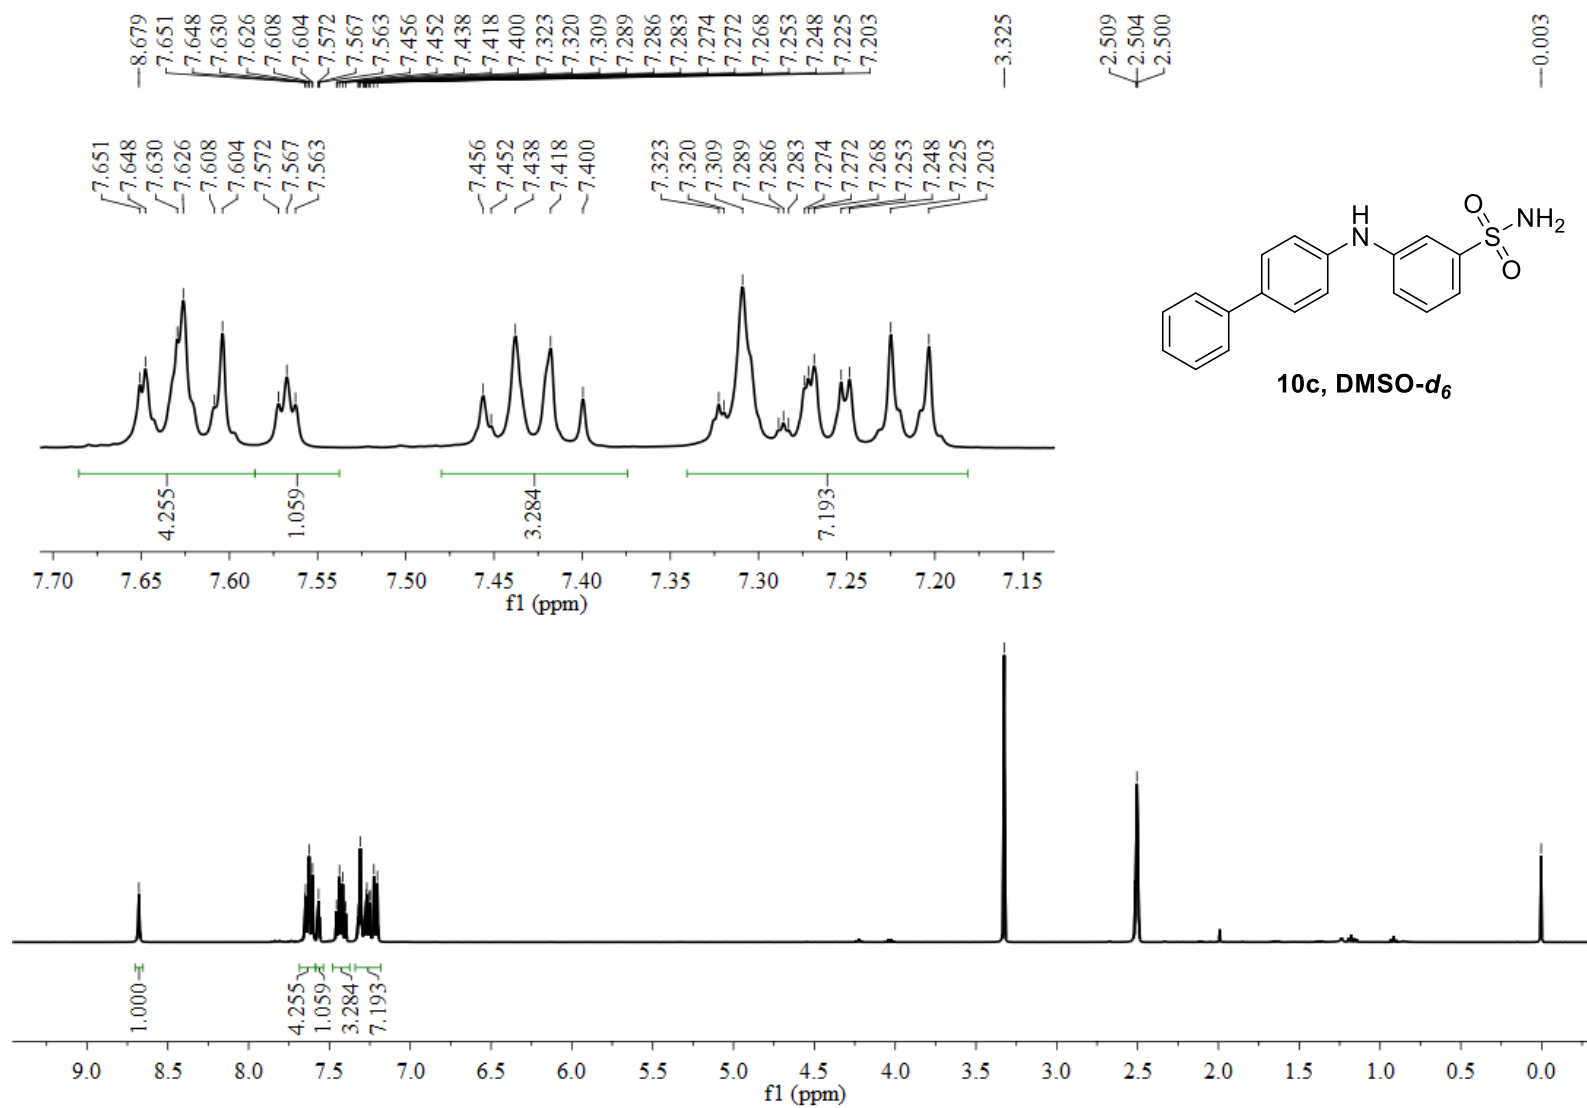

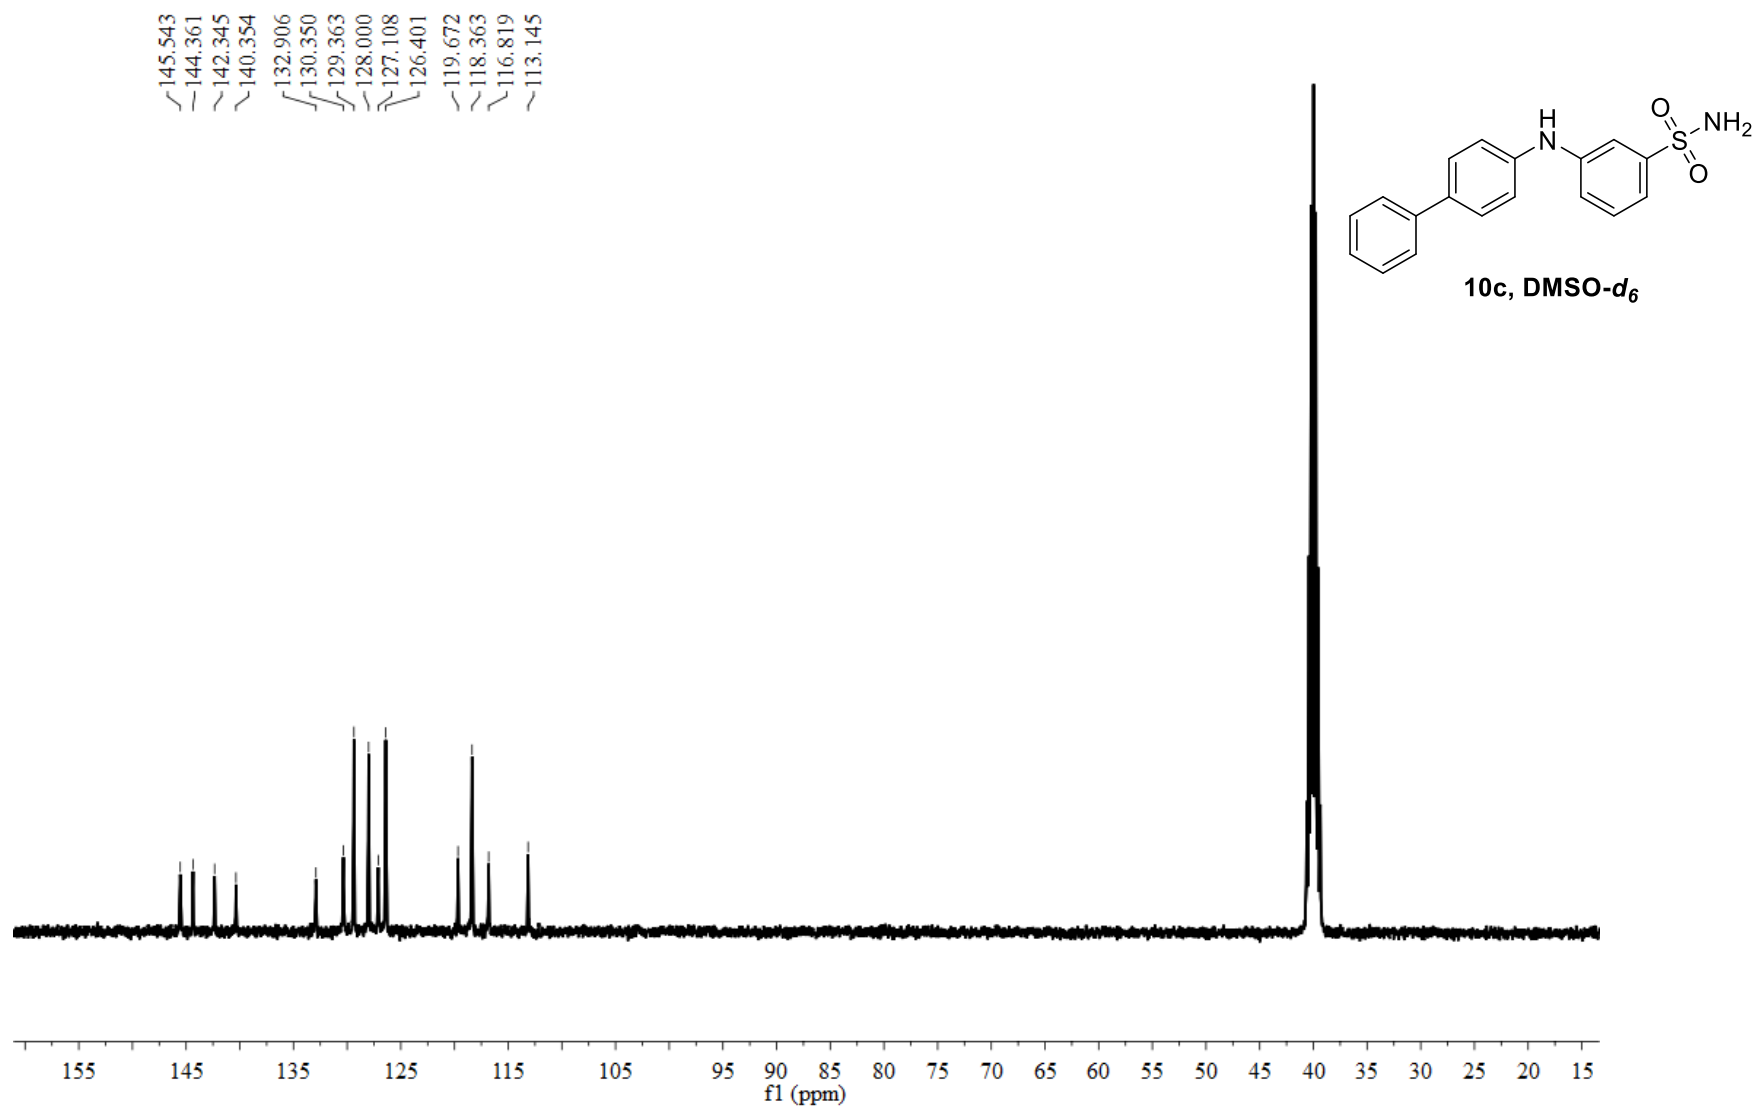

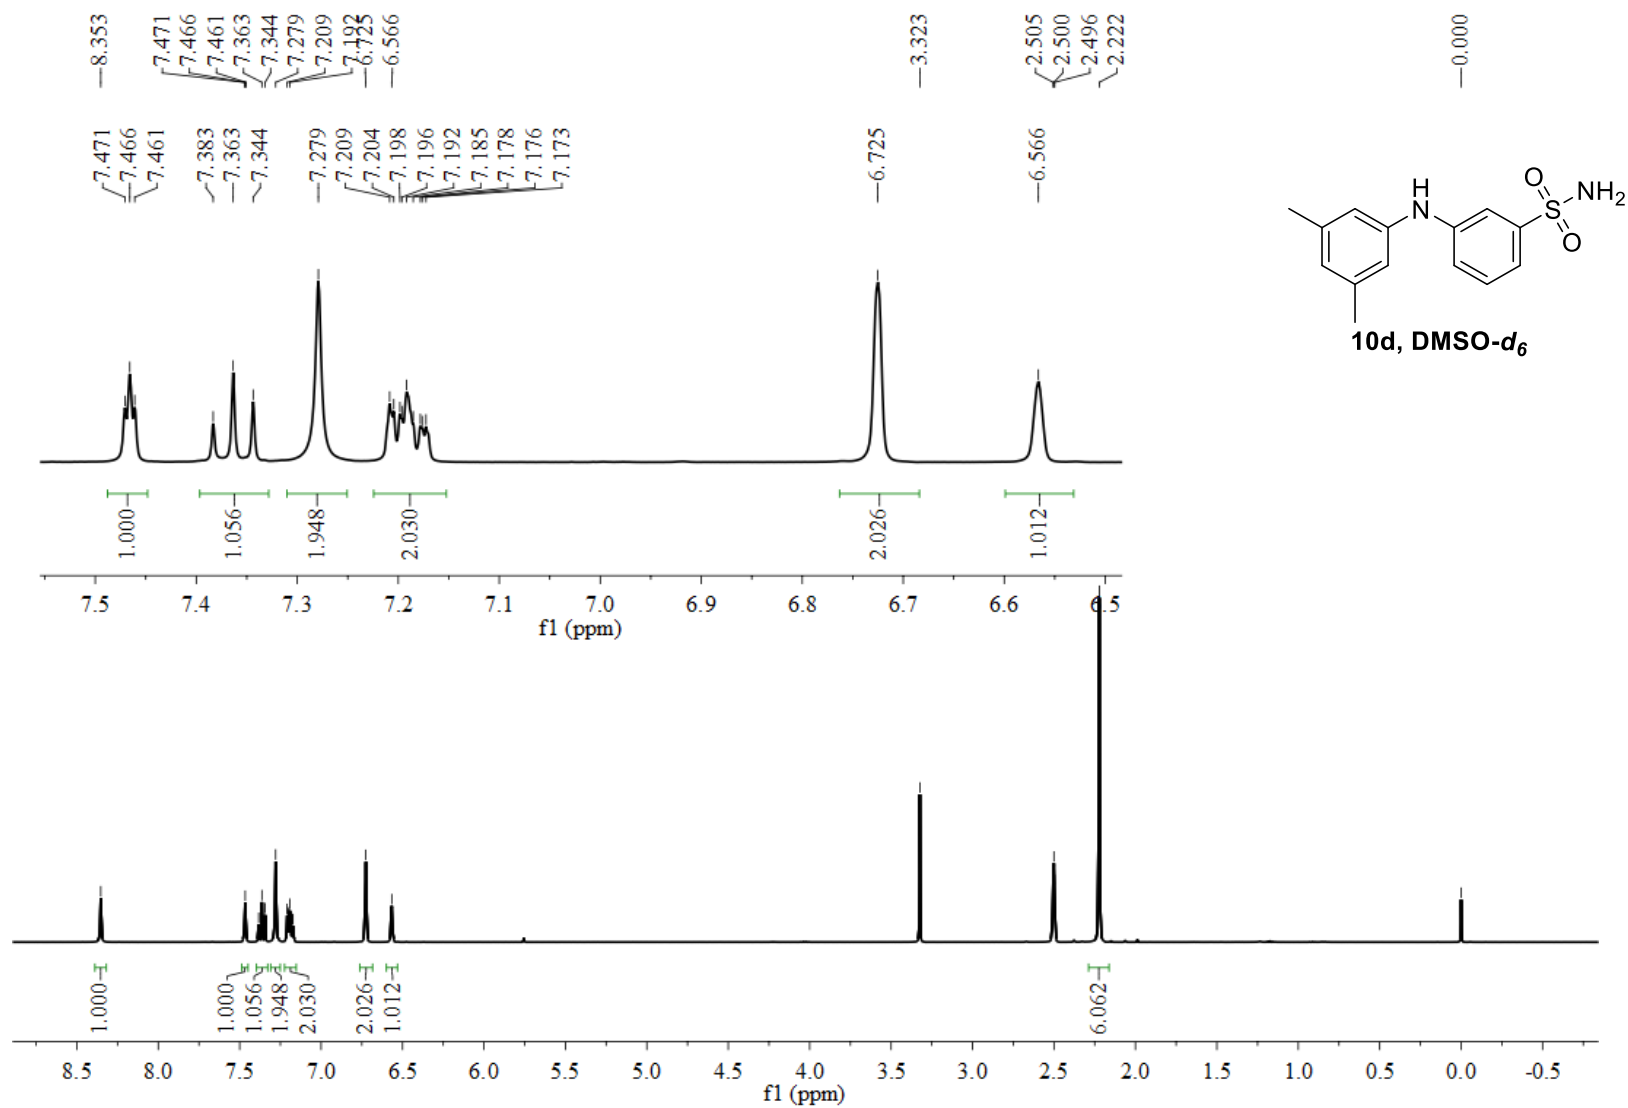

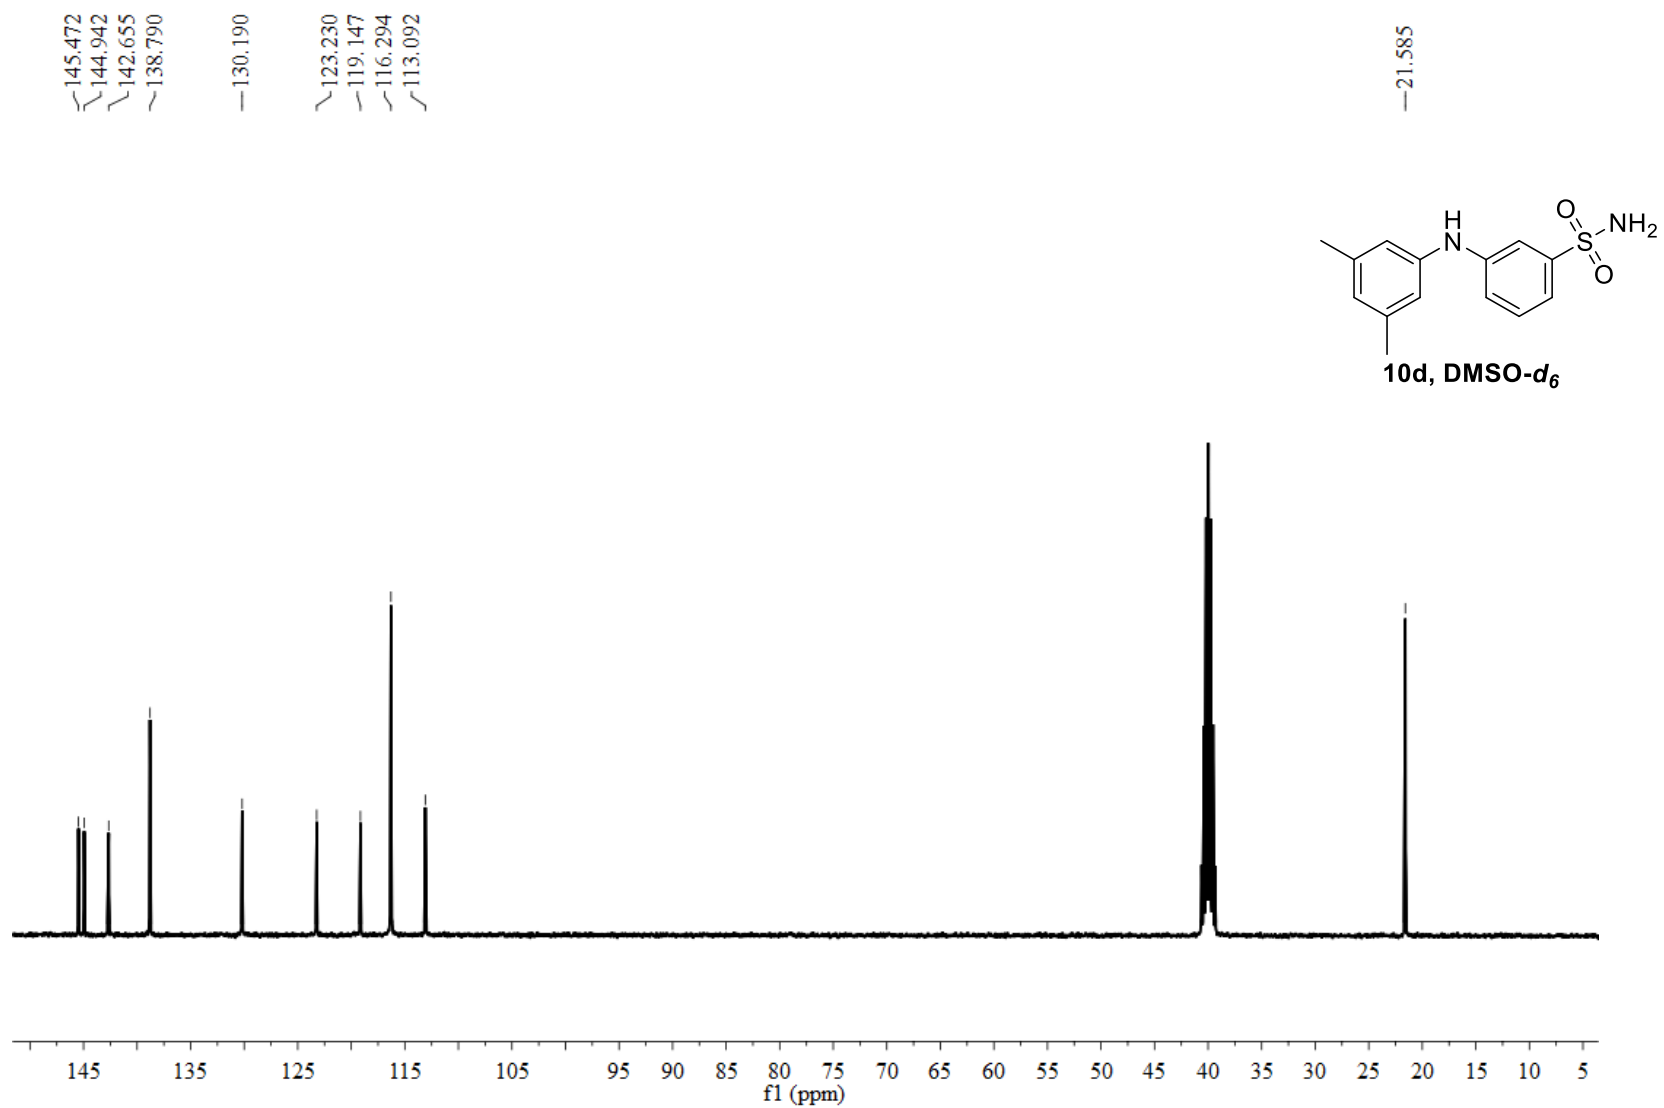

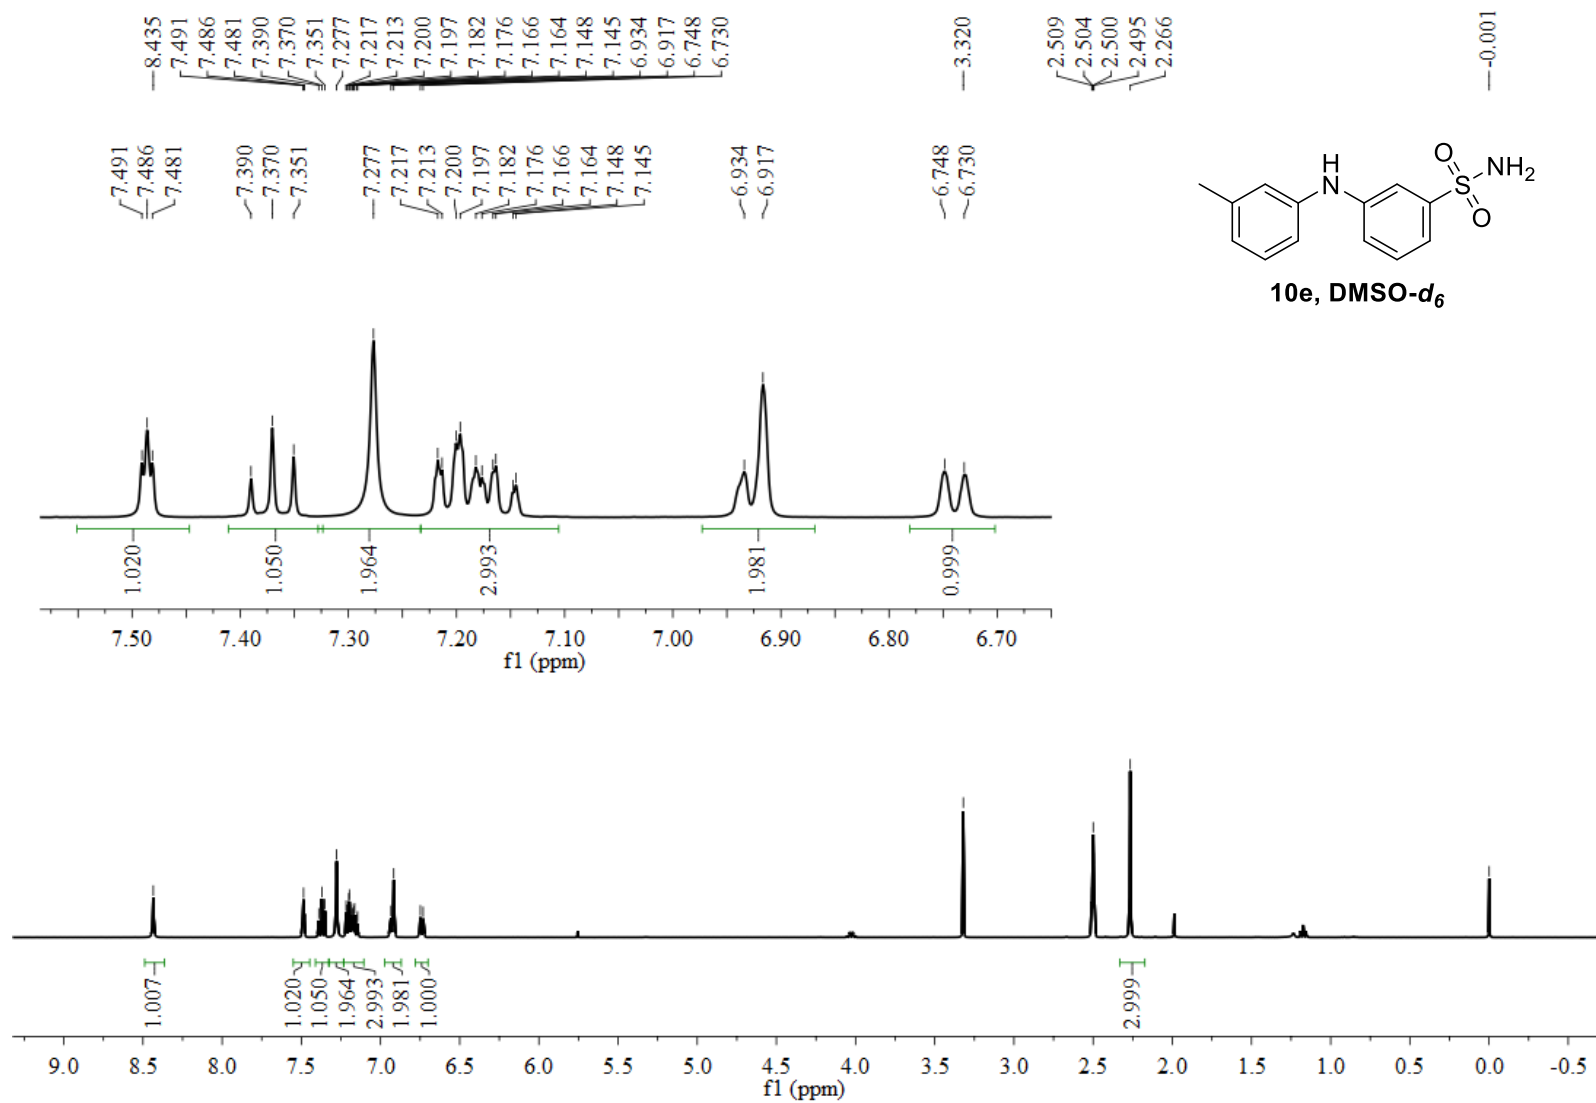

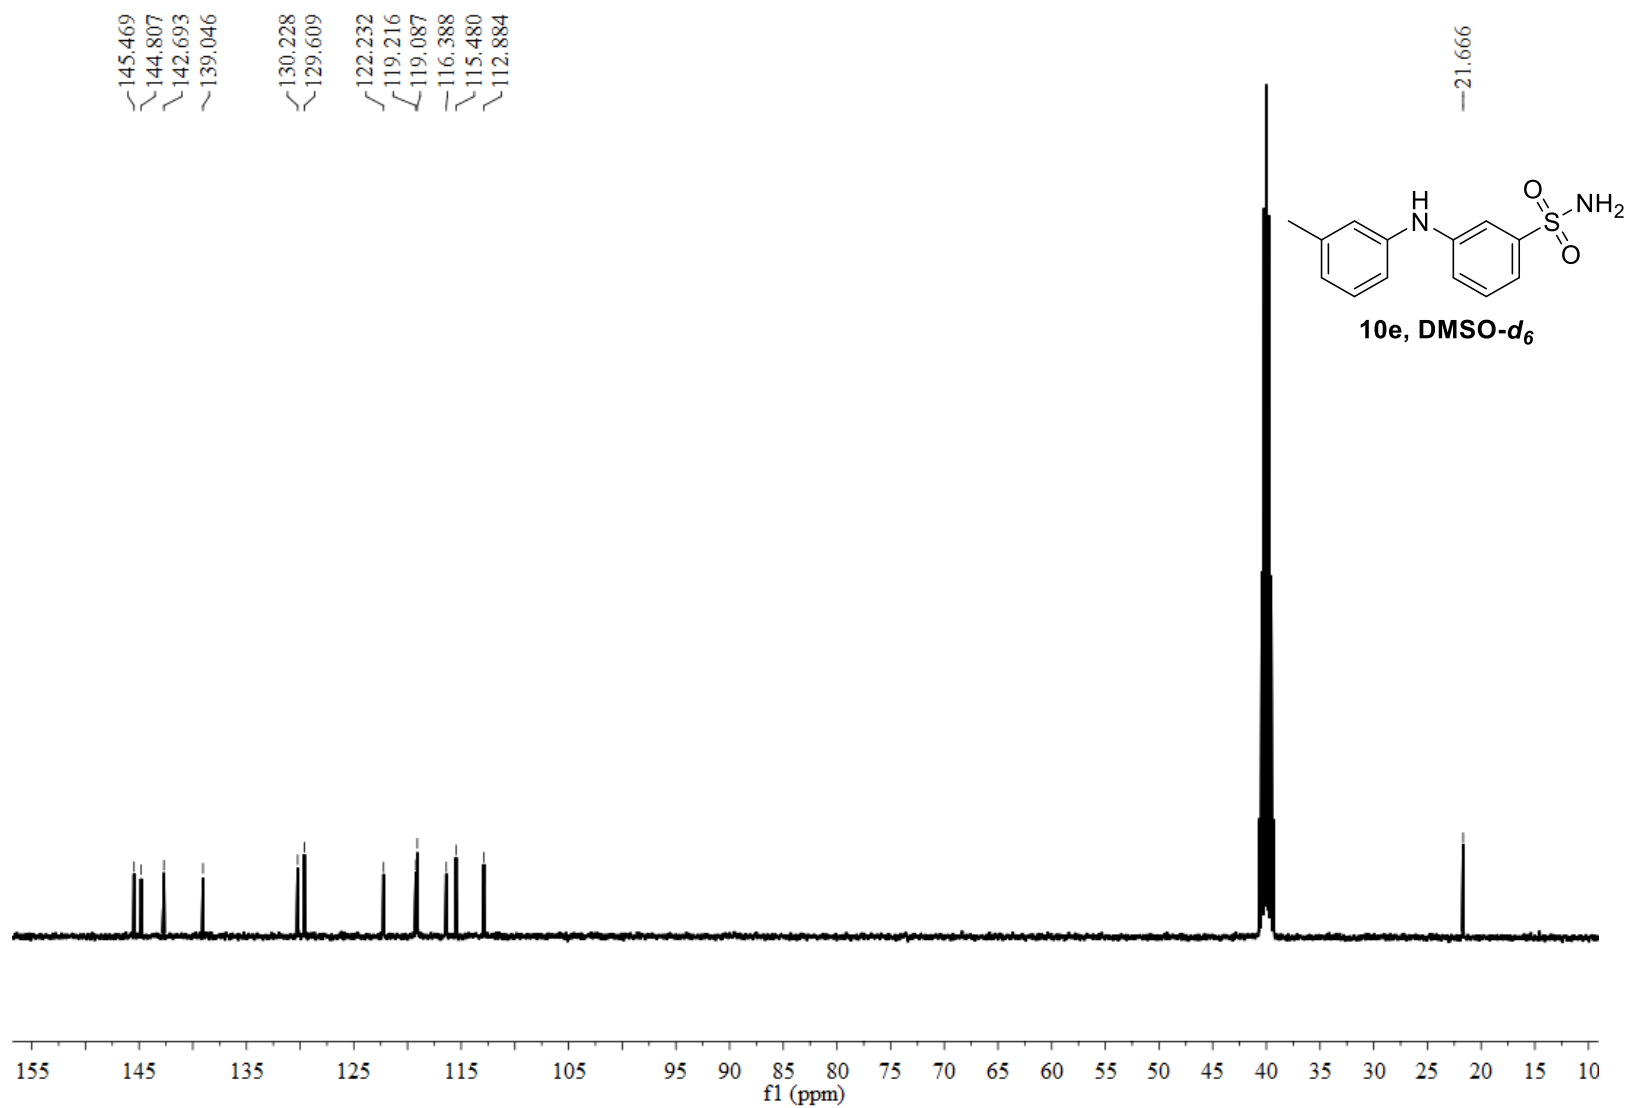

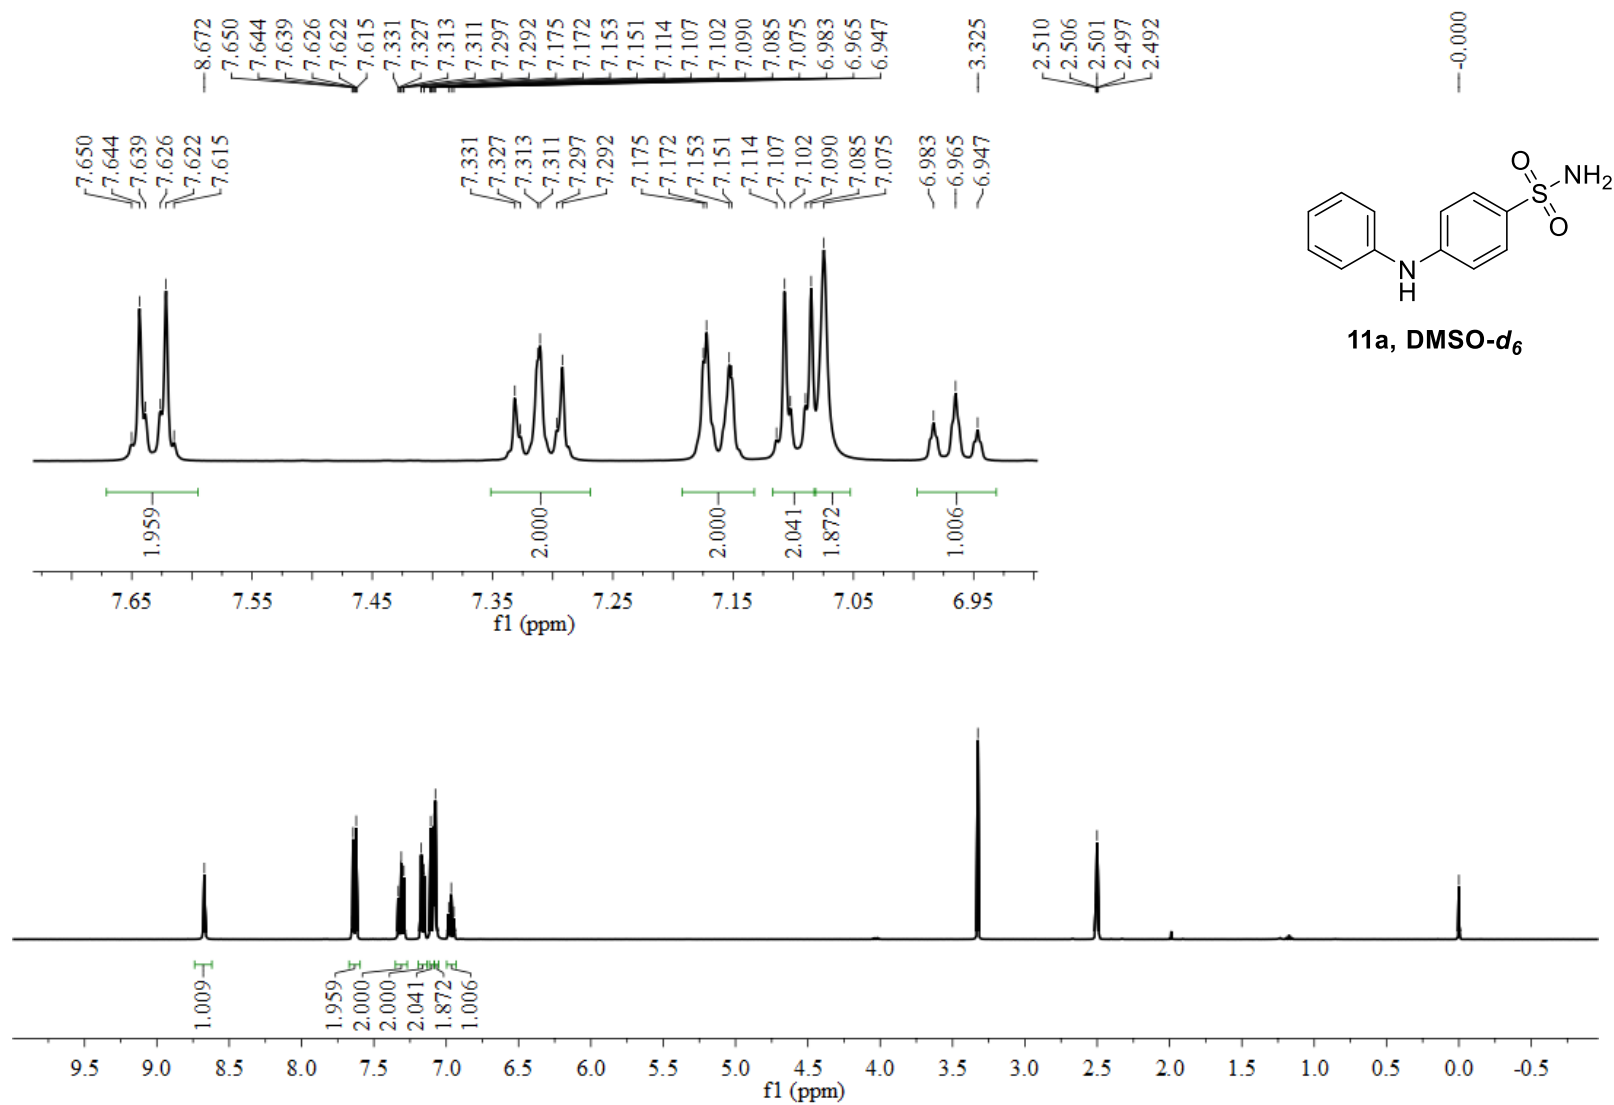

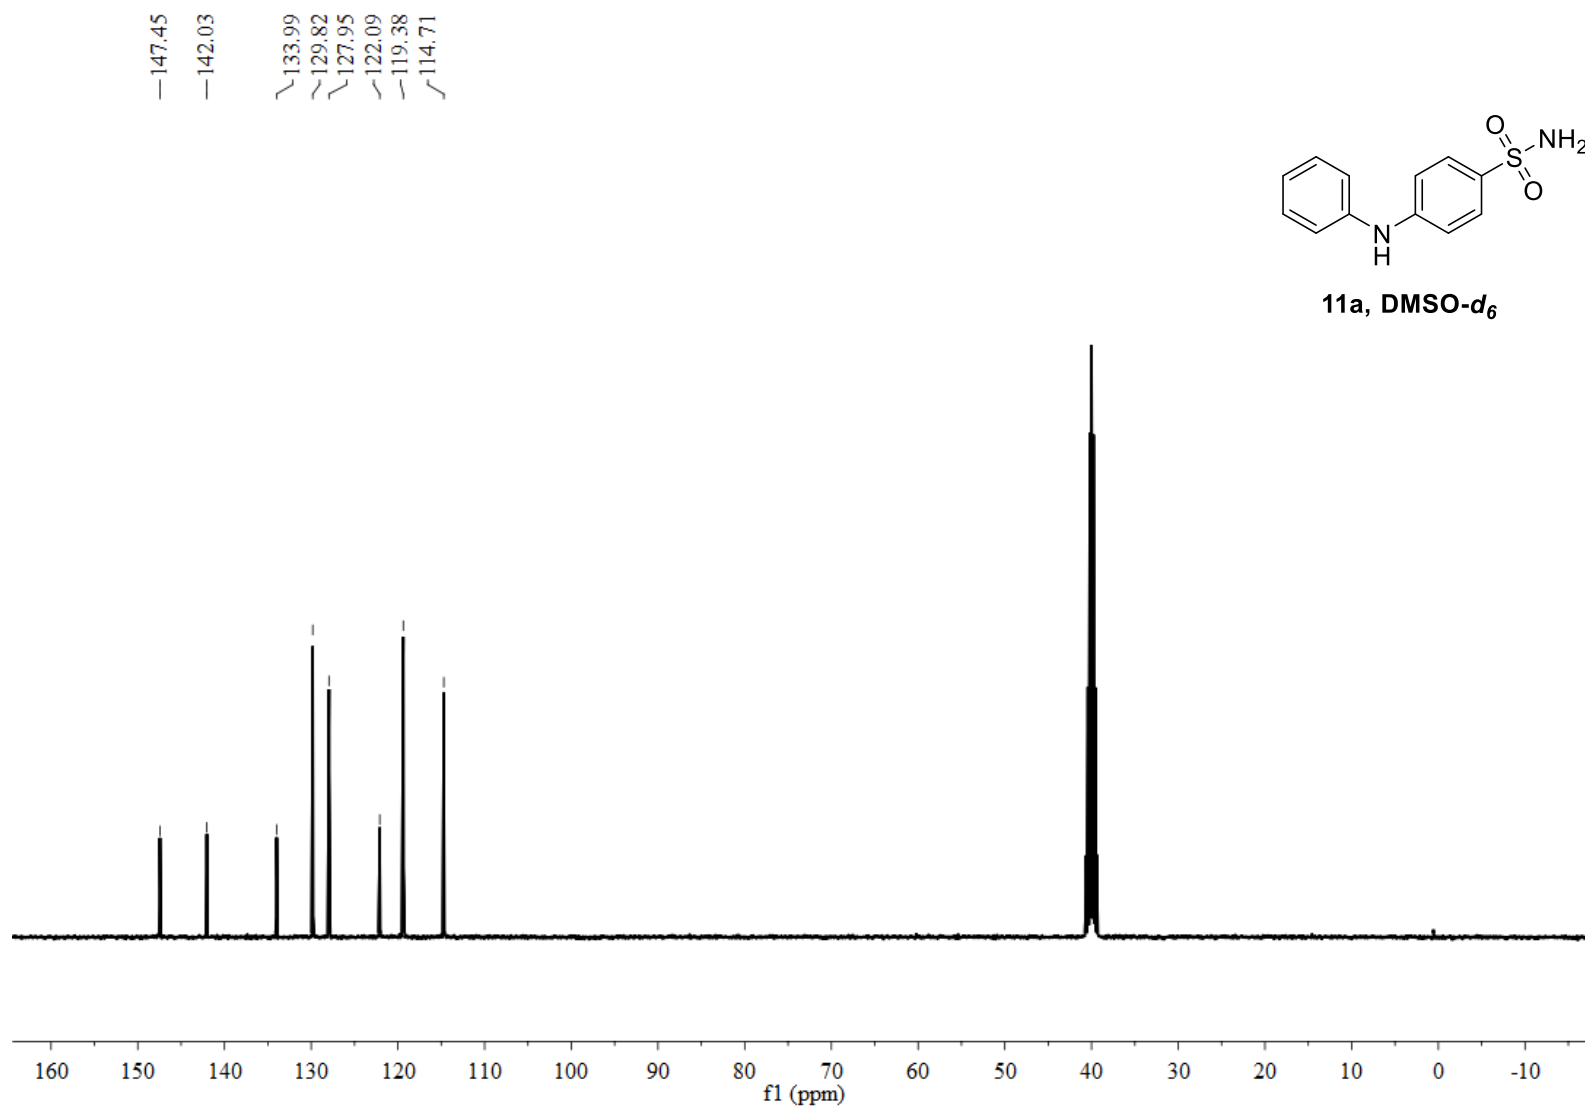



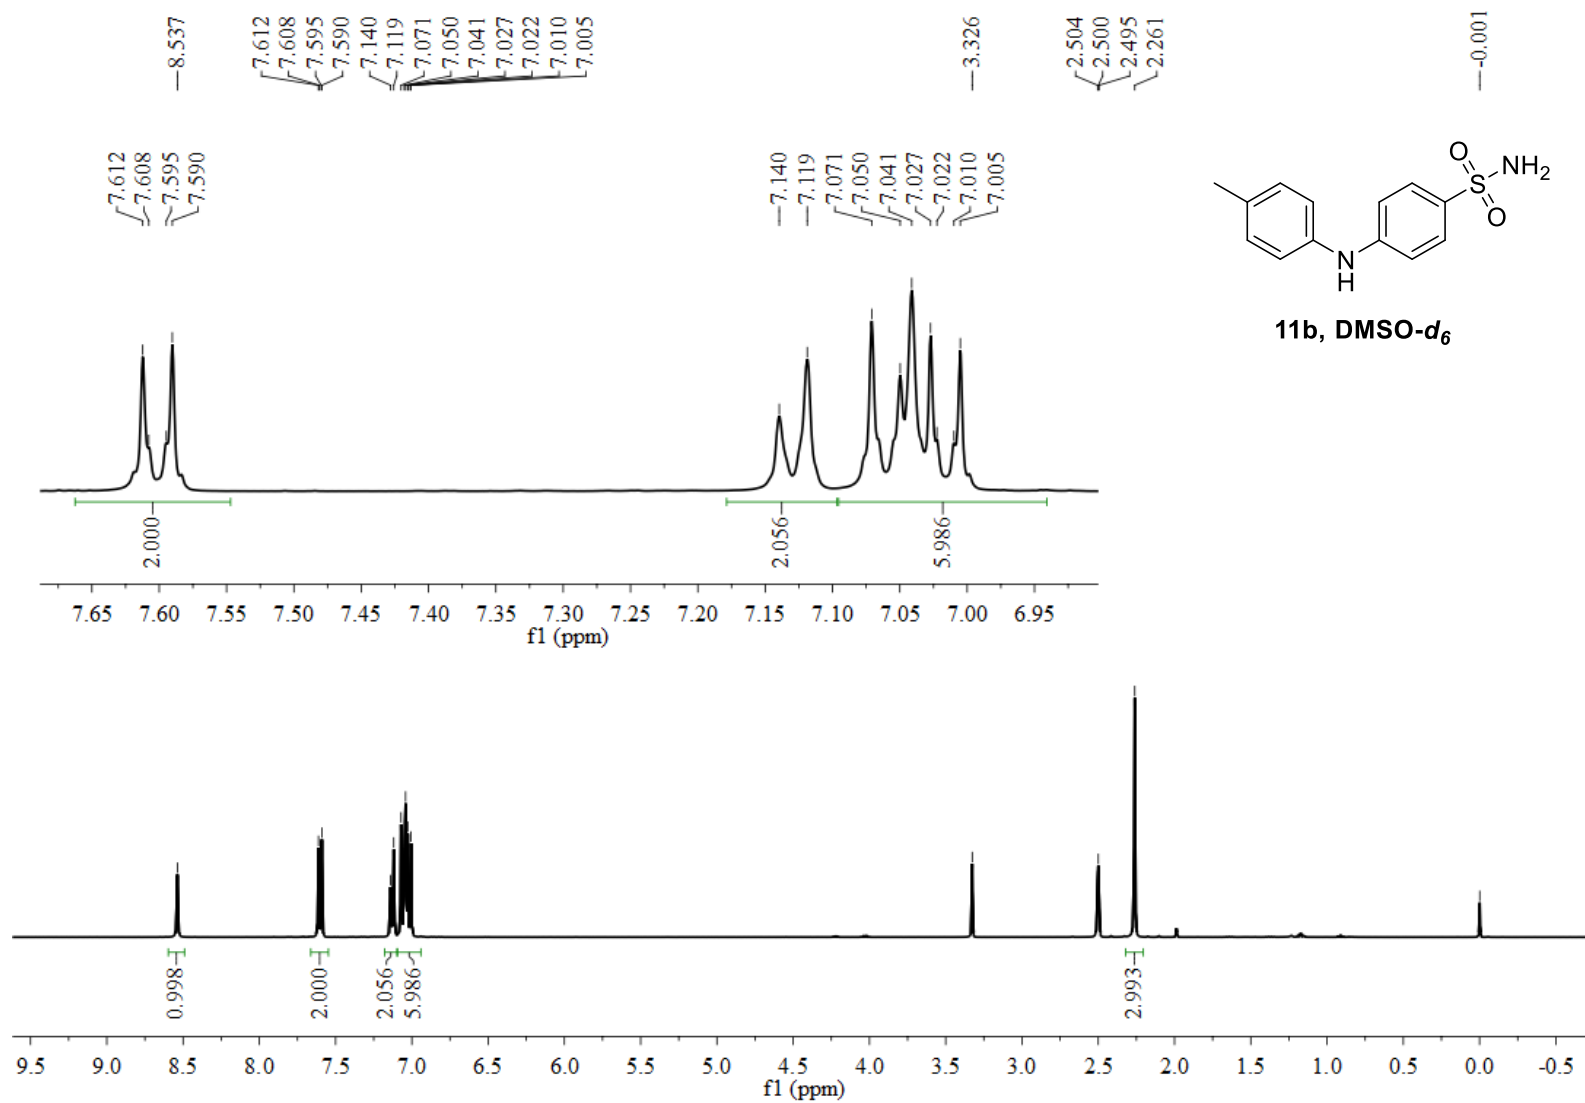

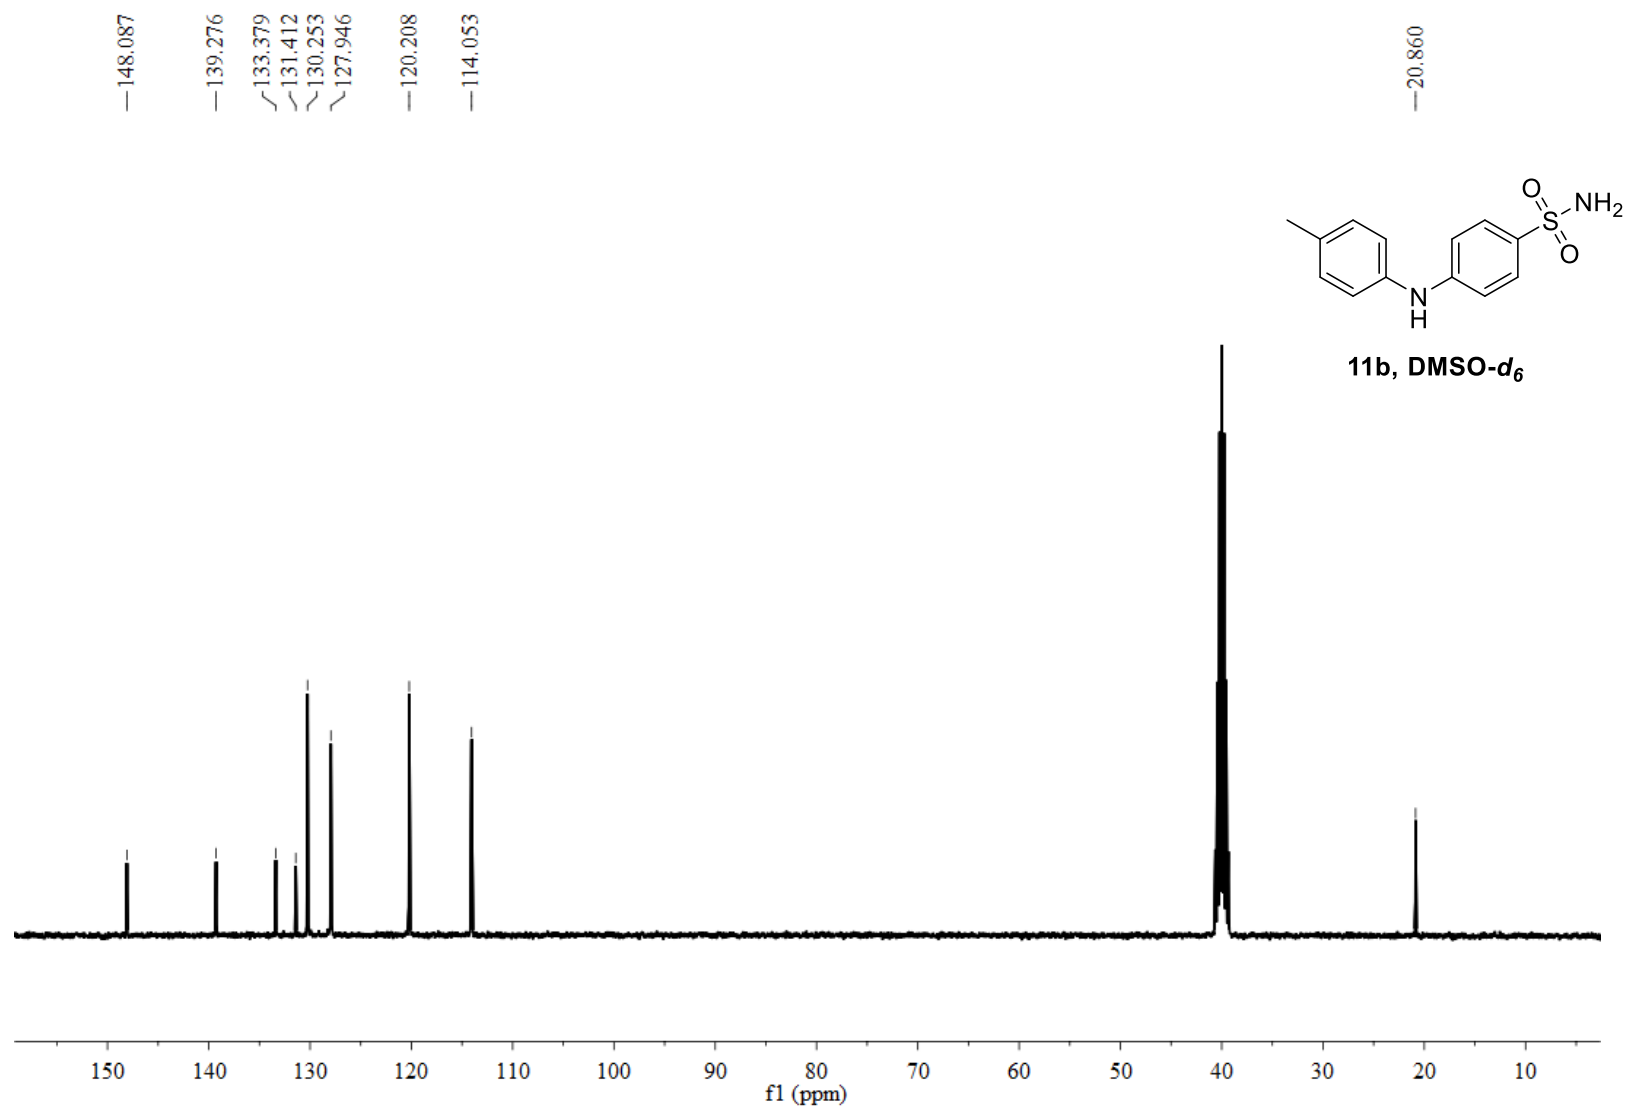

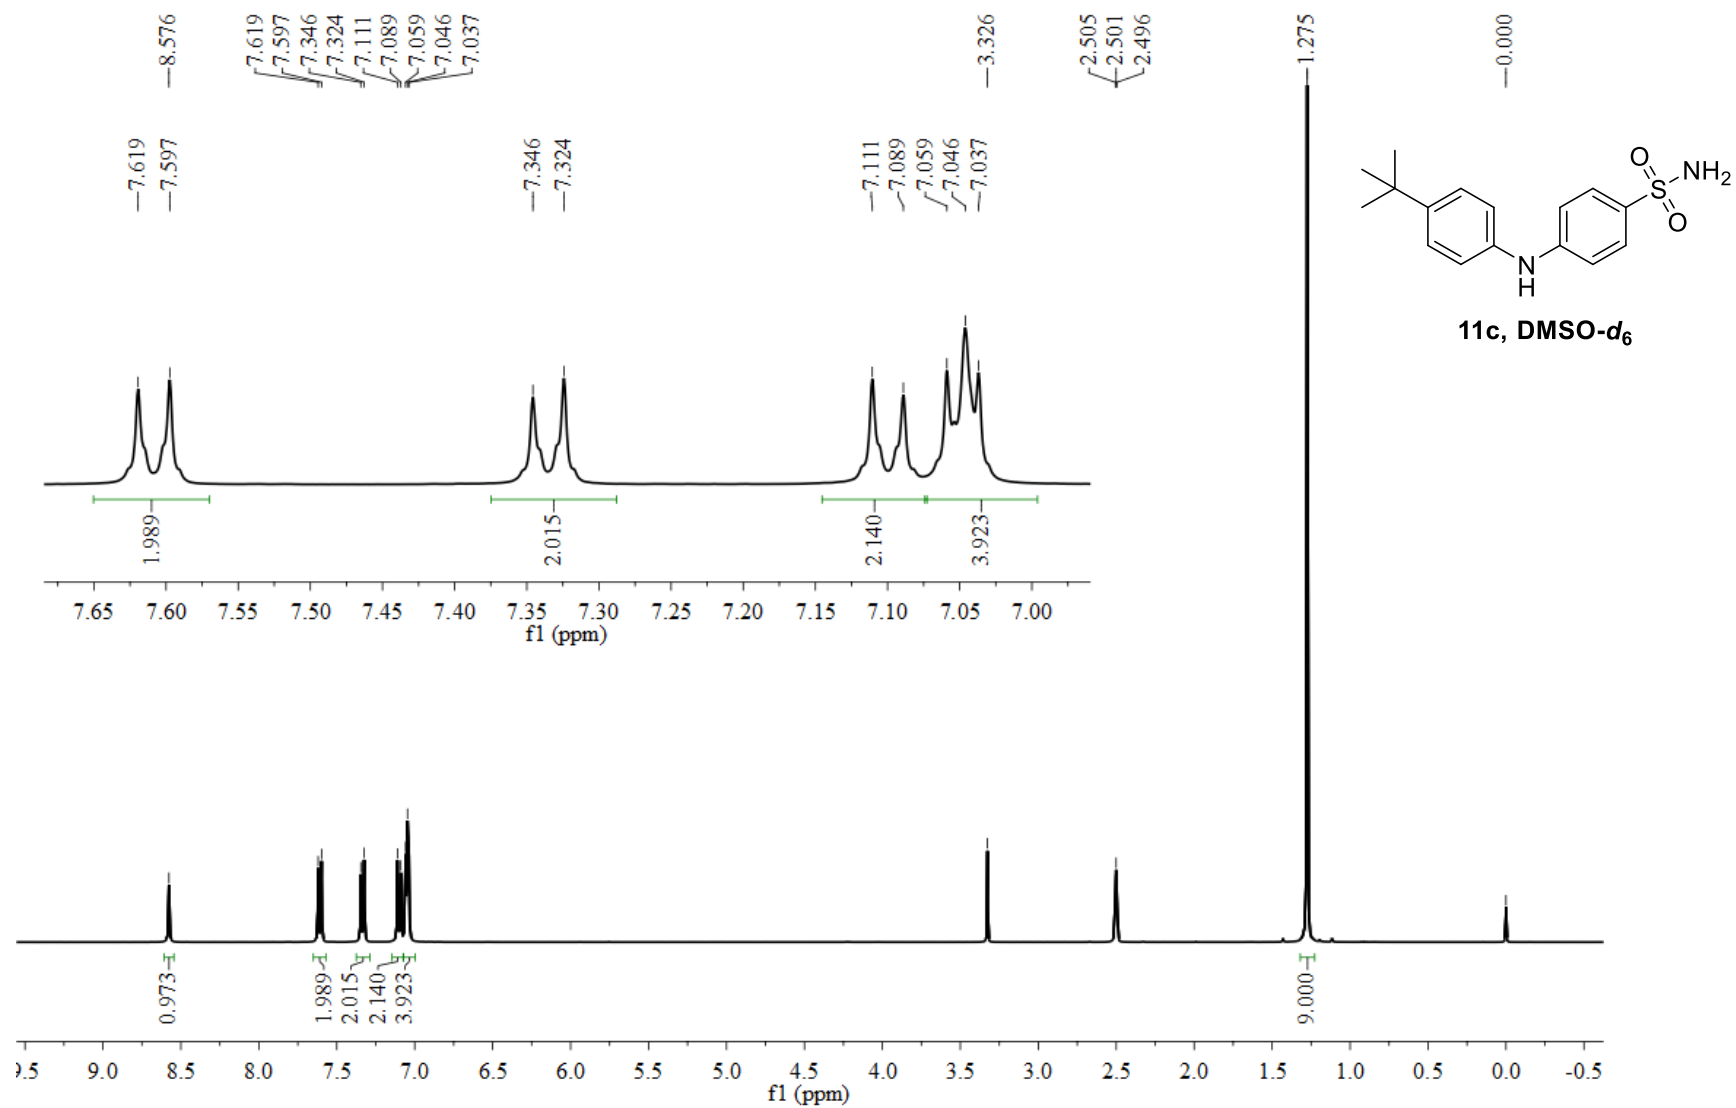

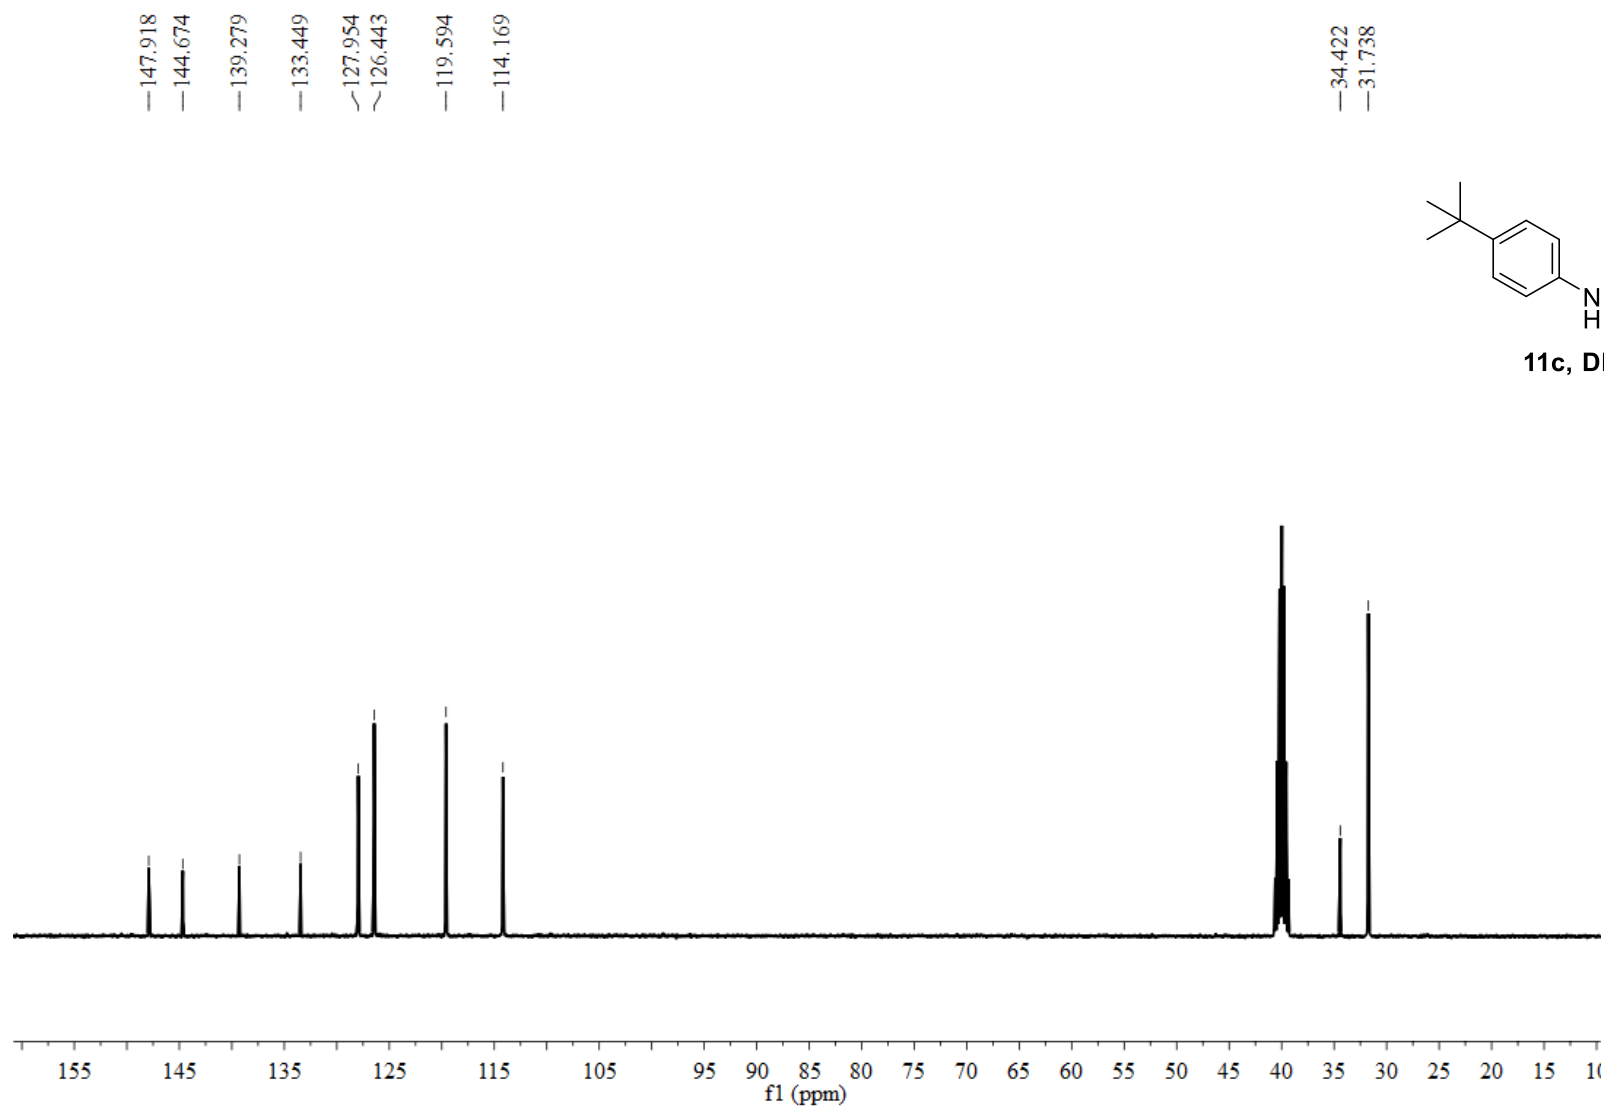

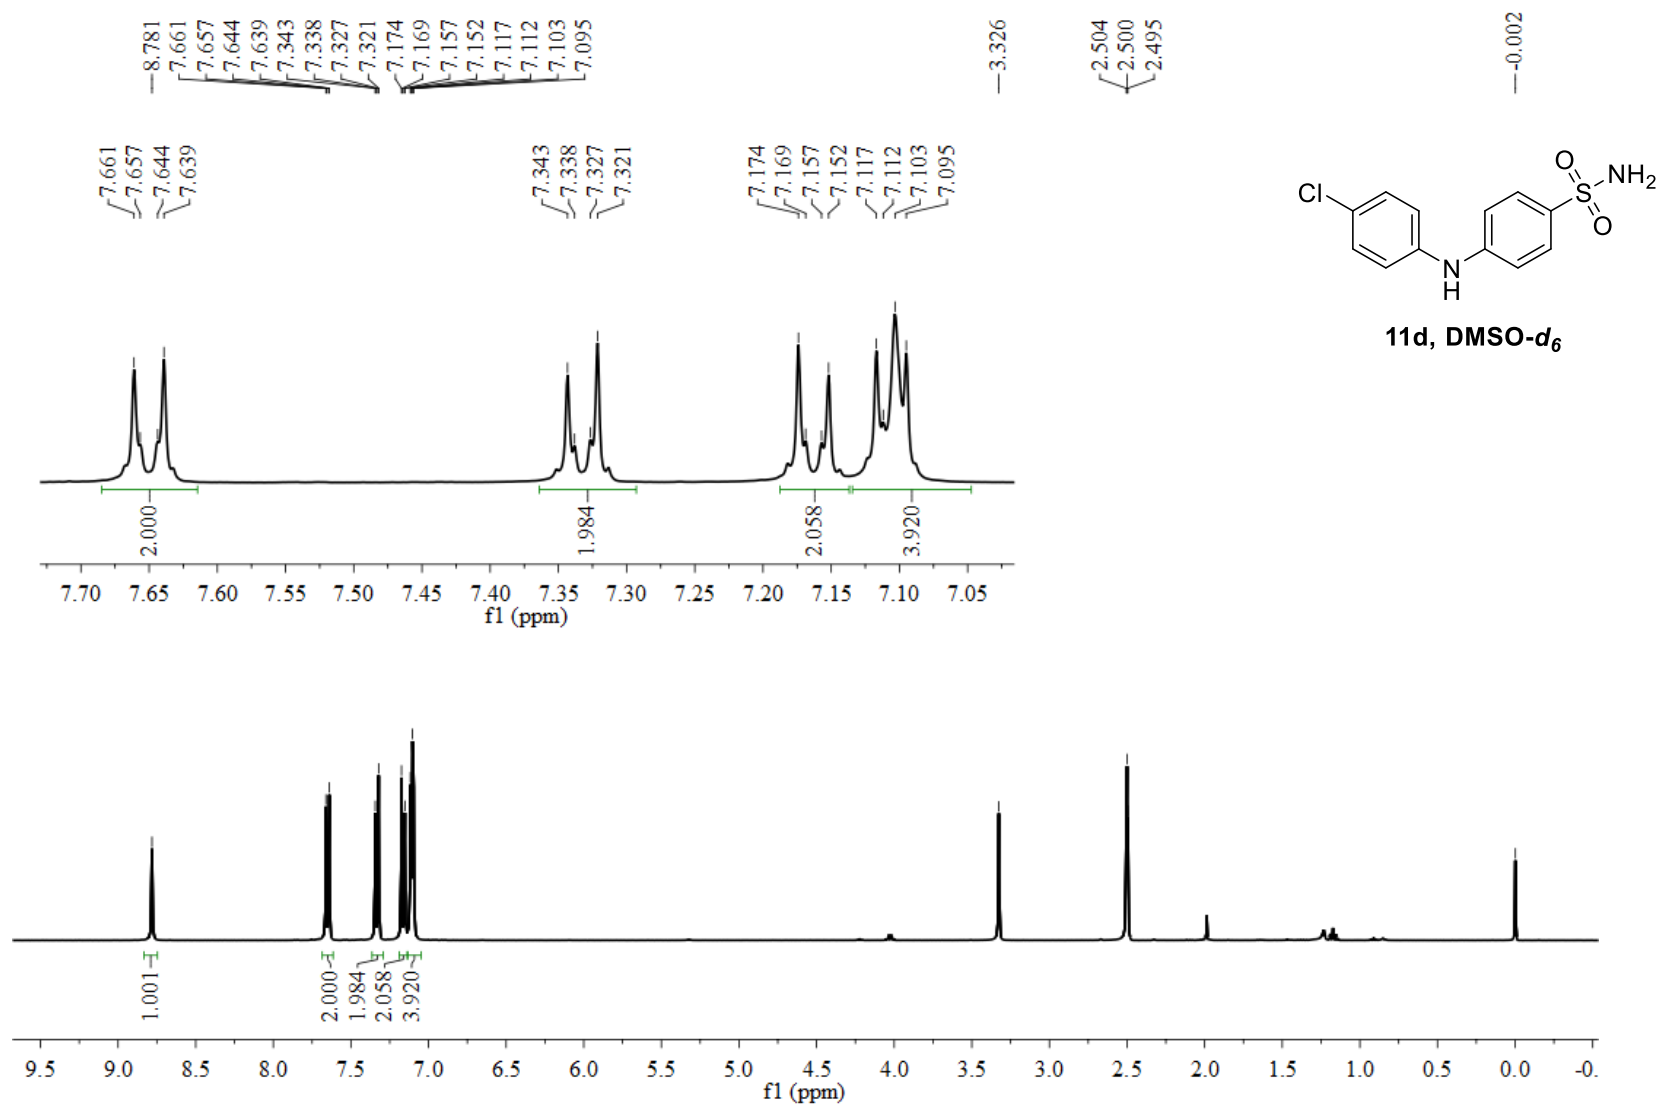

—146.845  
—141.186  
—134.637  
—129.638  
~127.958  
—125.167  
—120.497  
—115.218

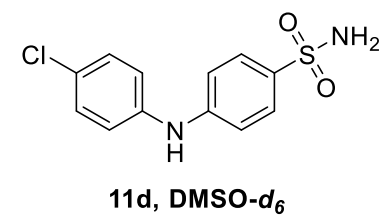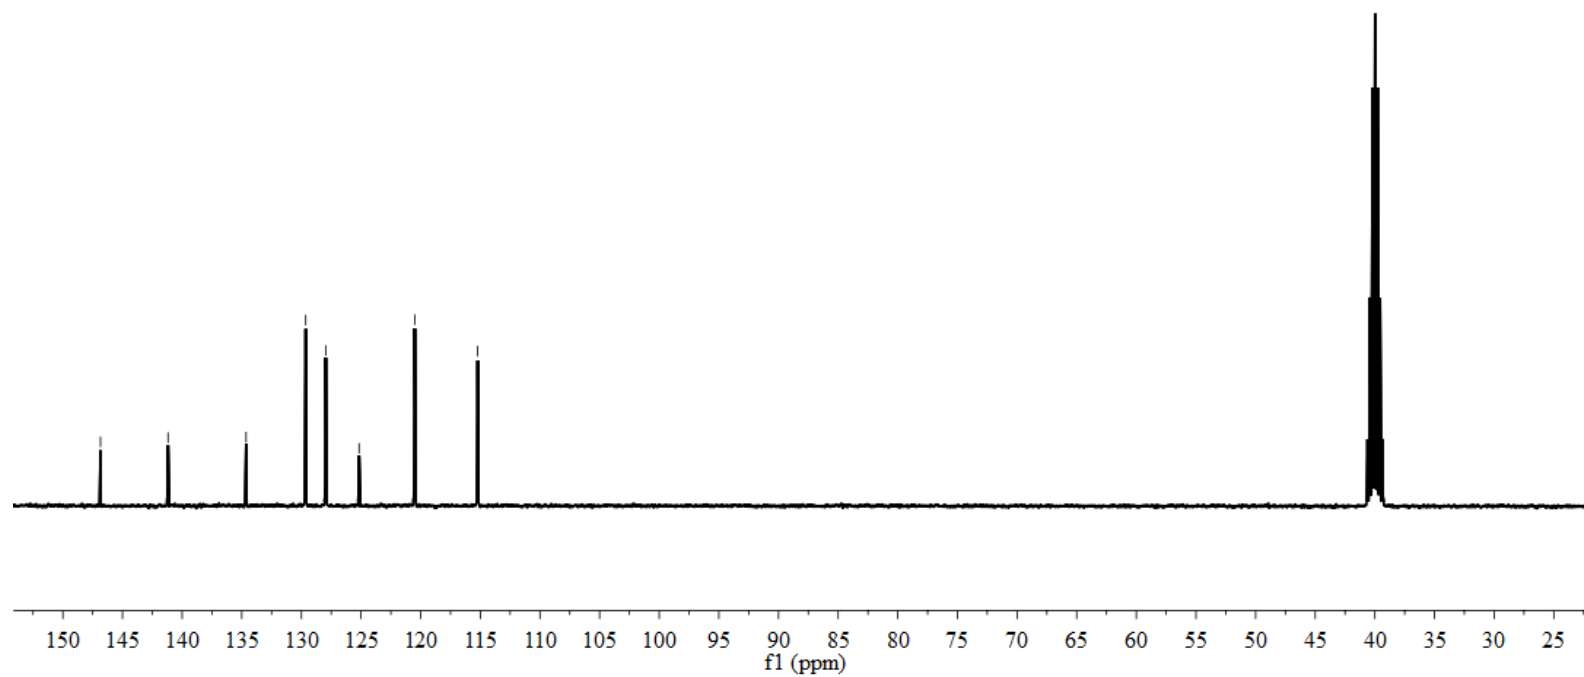

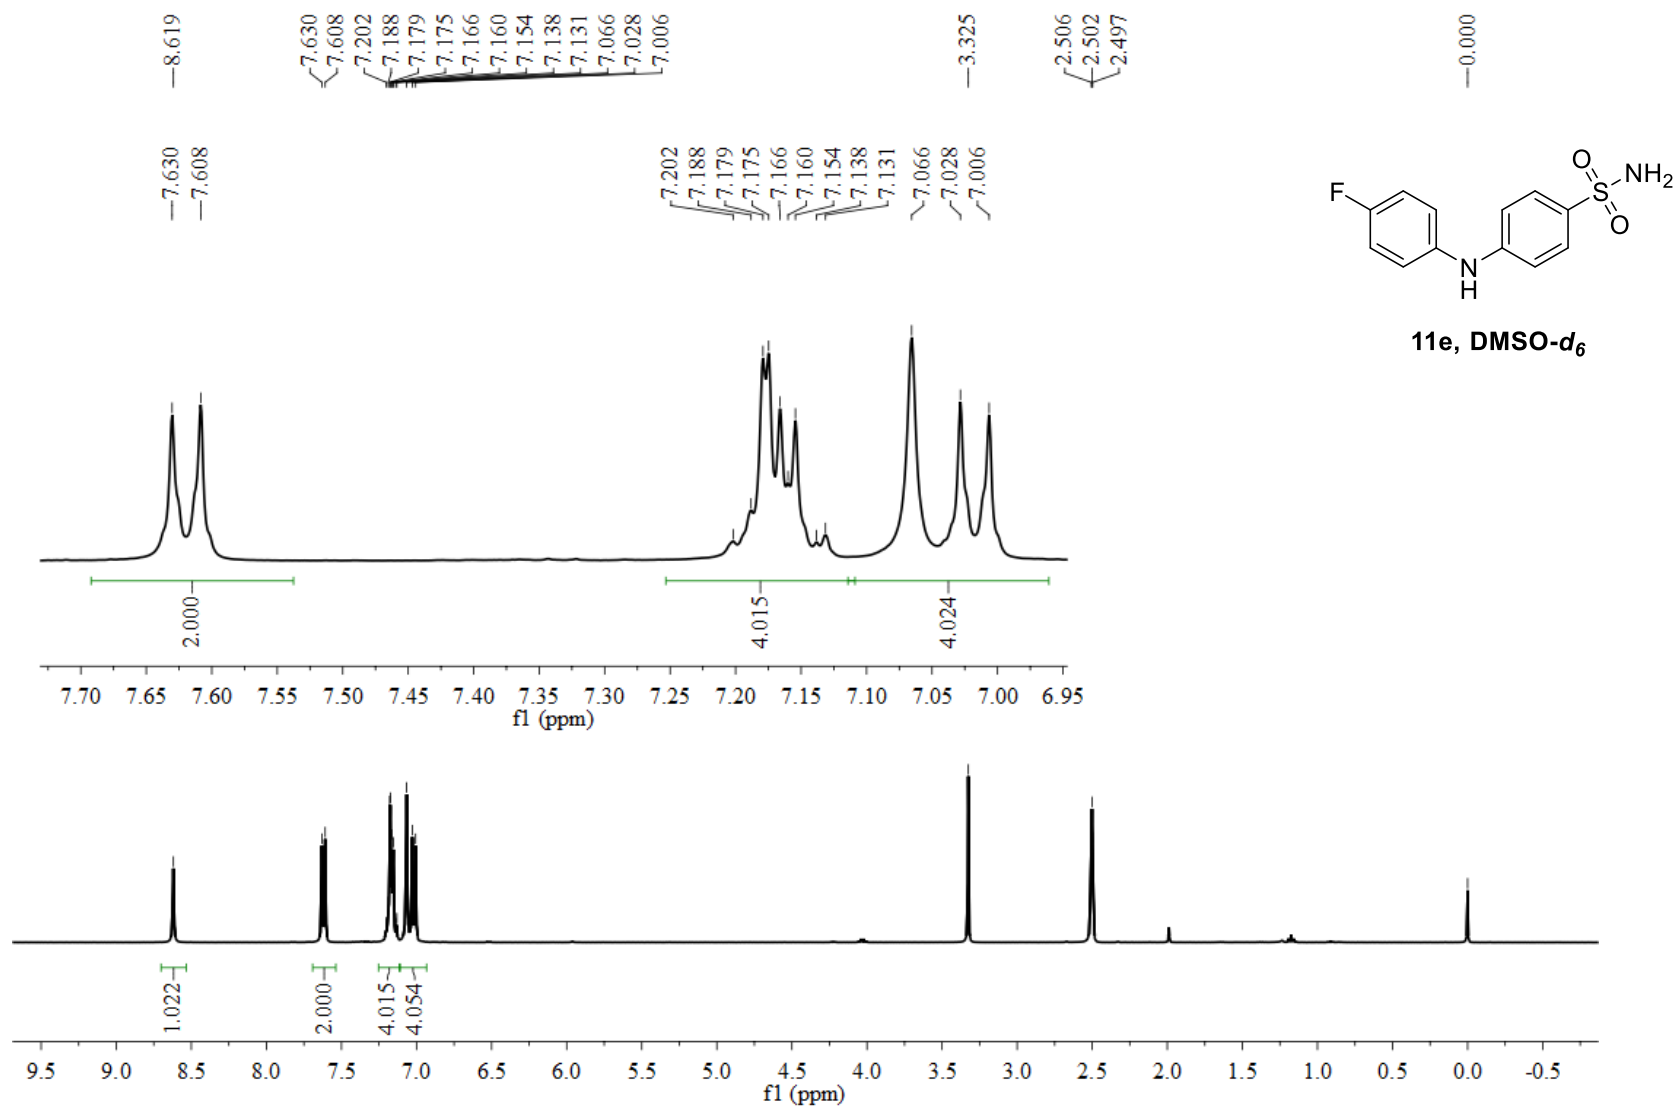

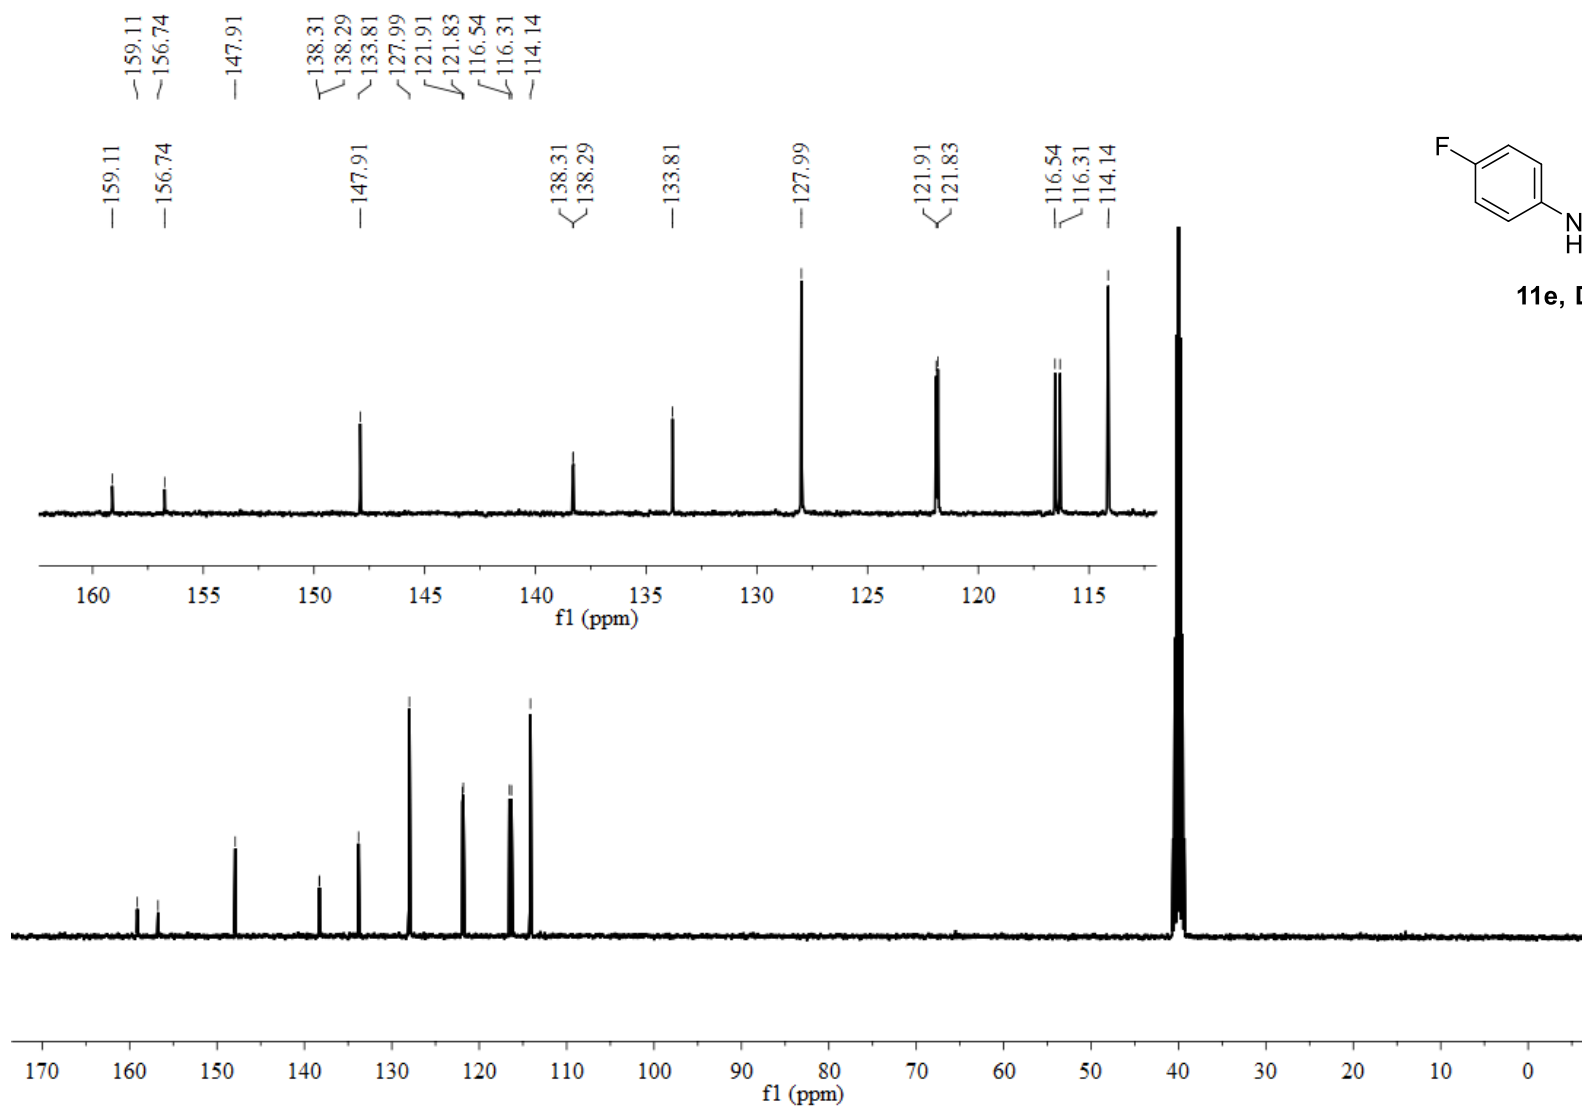



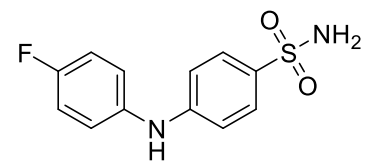

**11e, DMSO-*d*<sub>6</sub>**

---121.159

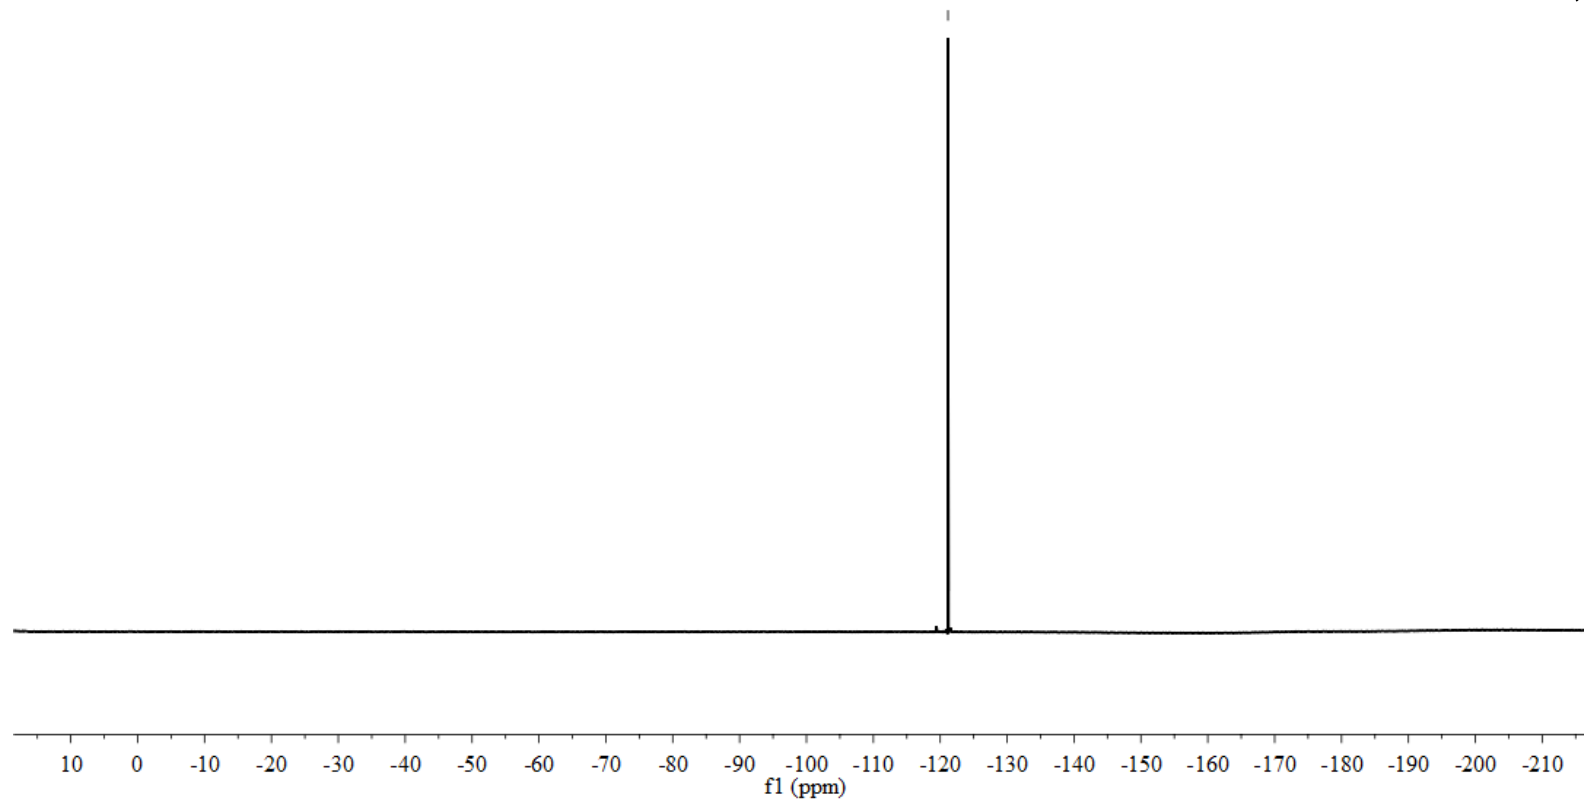

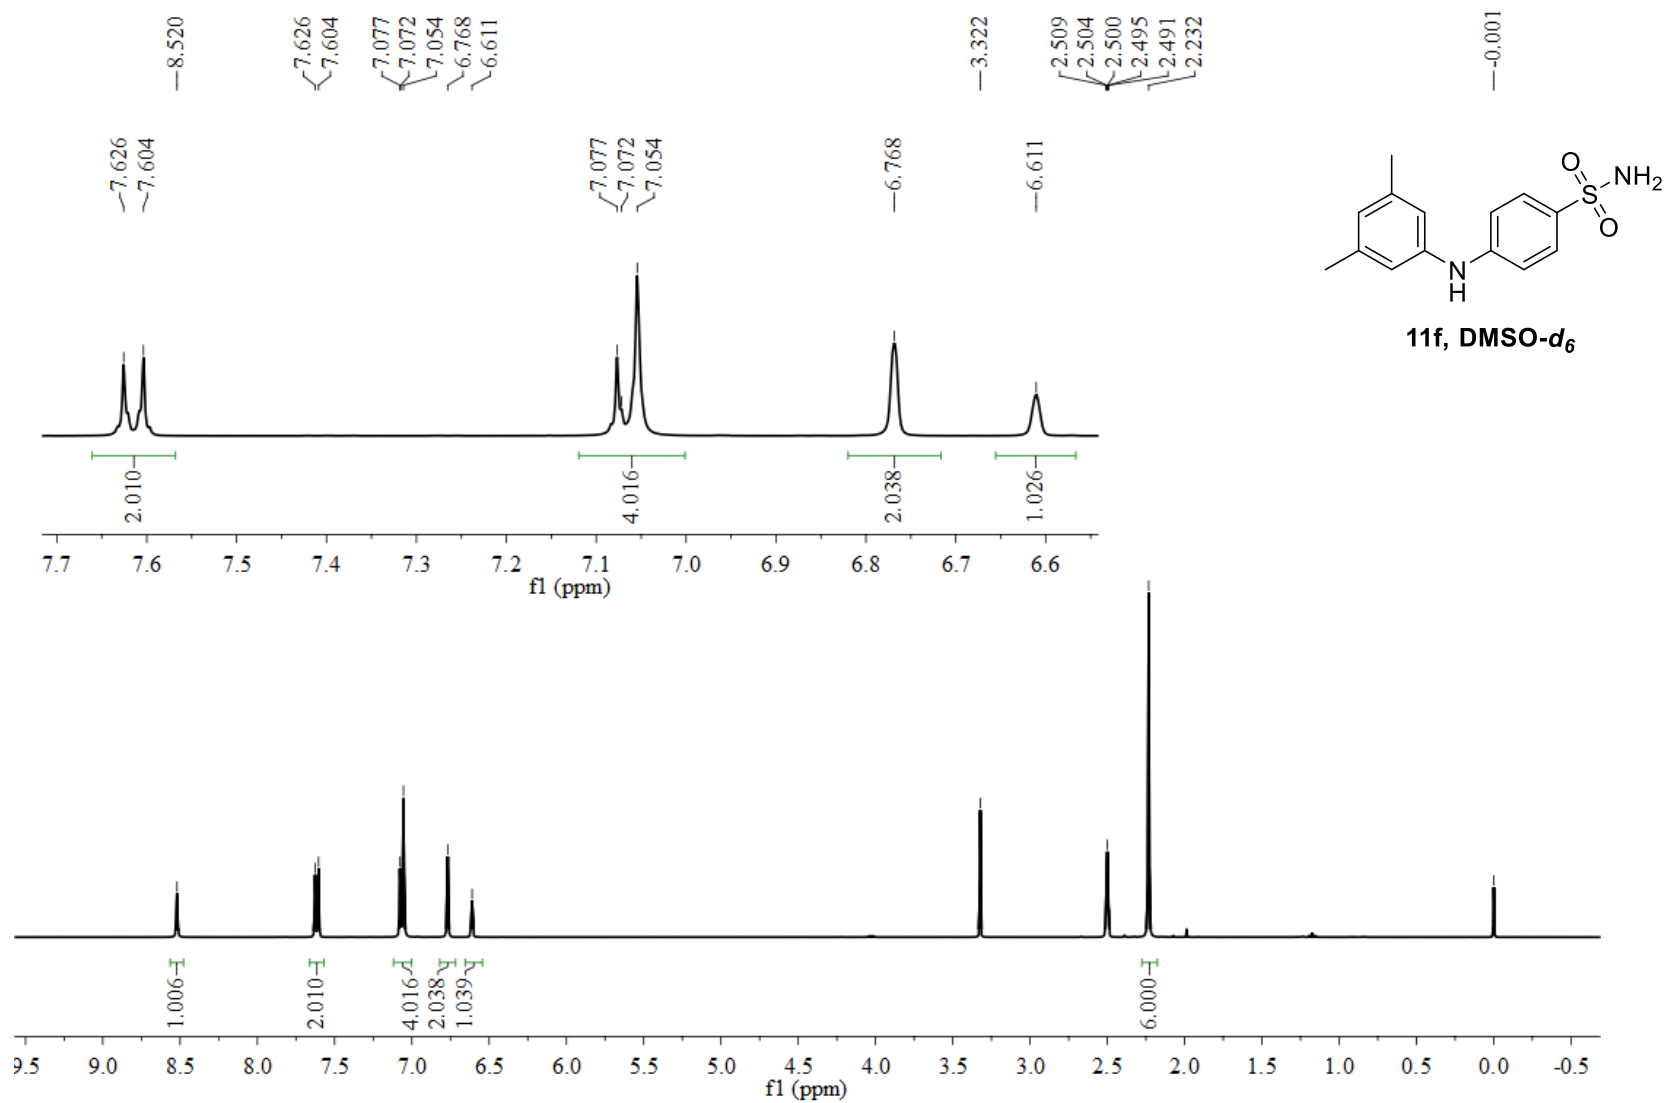

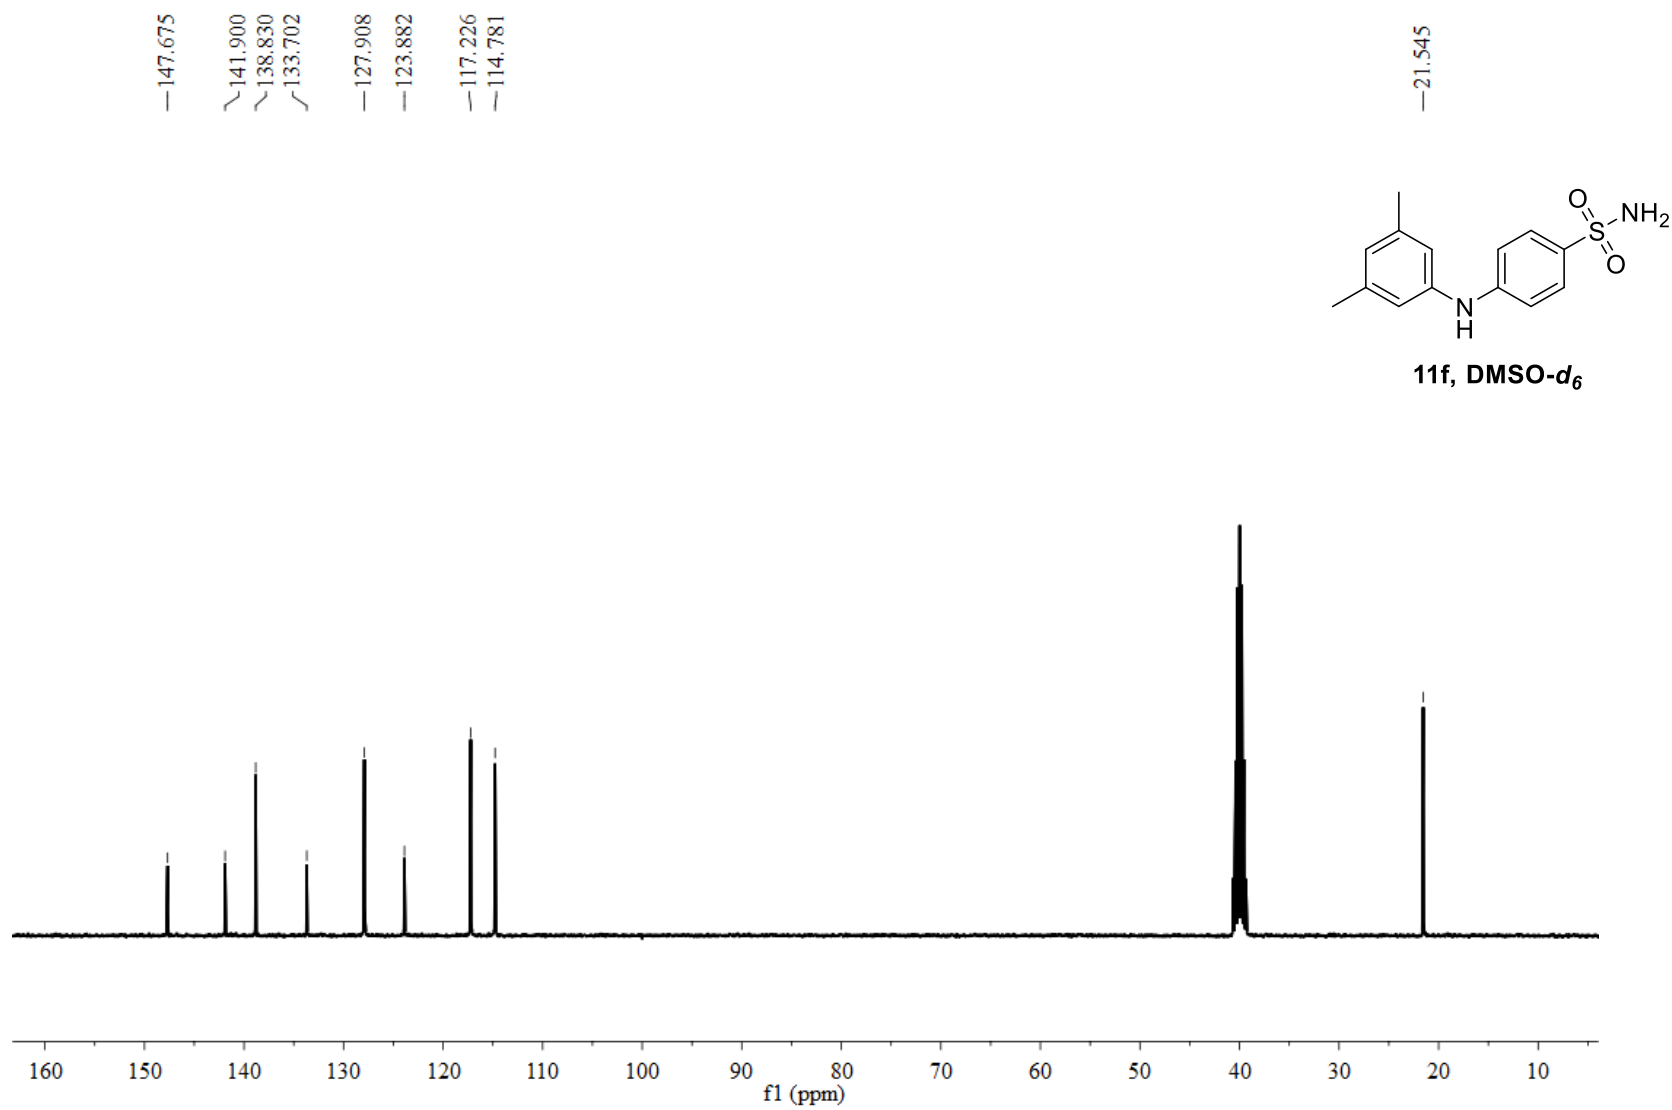

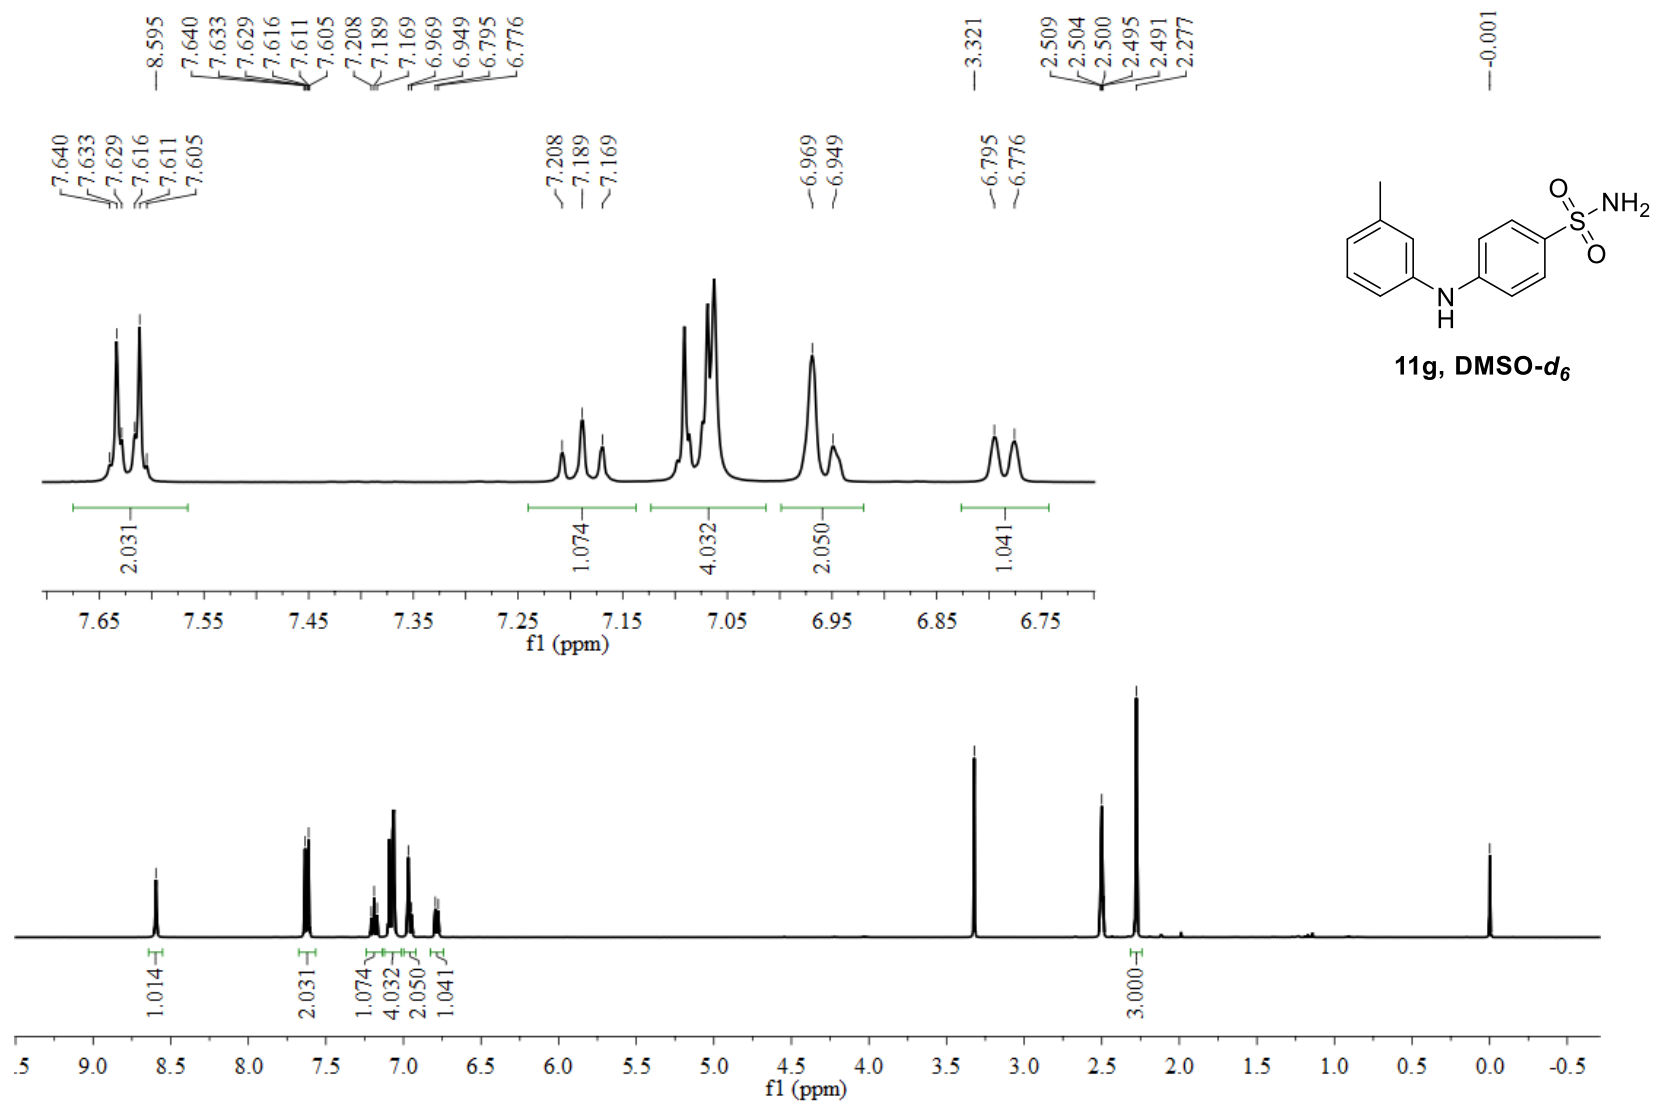

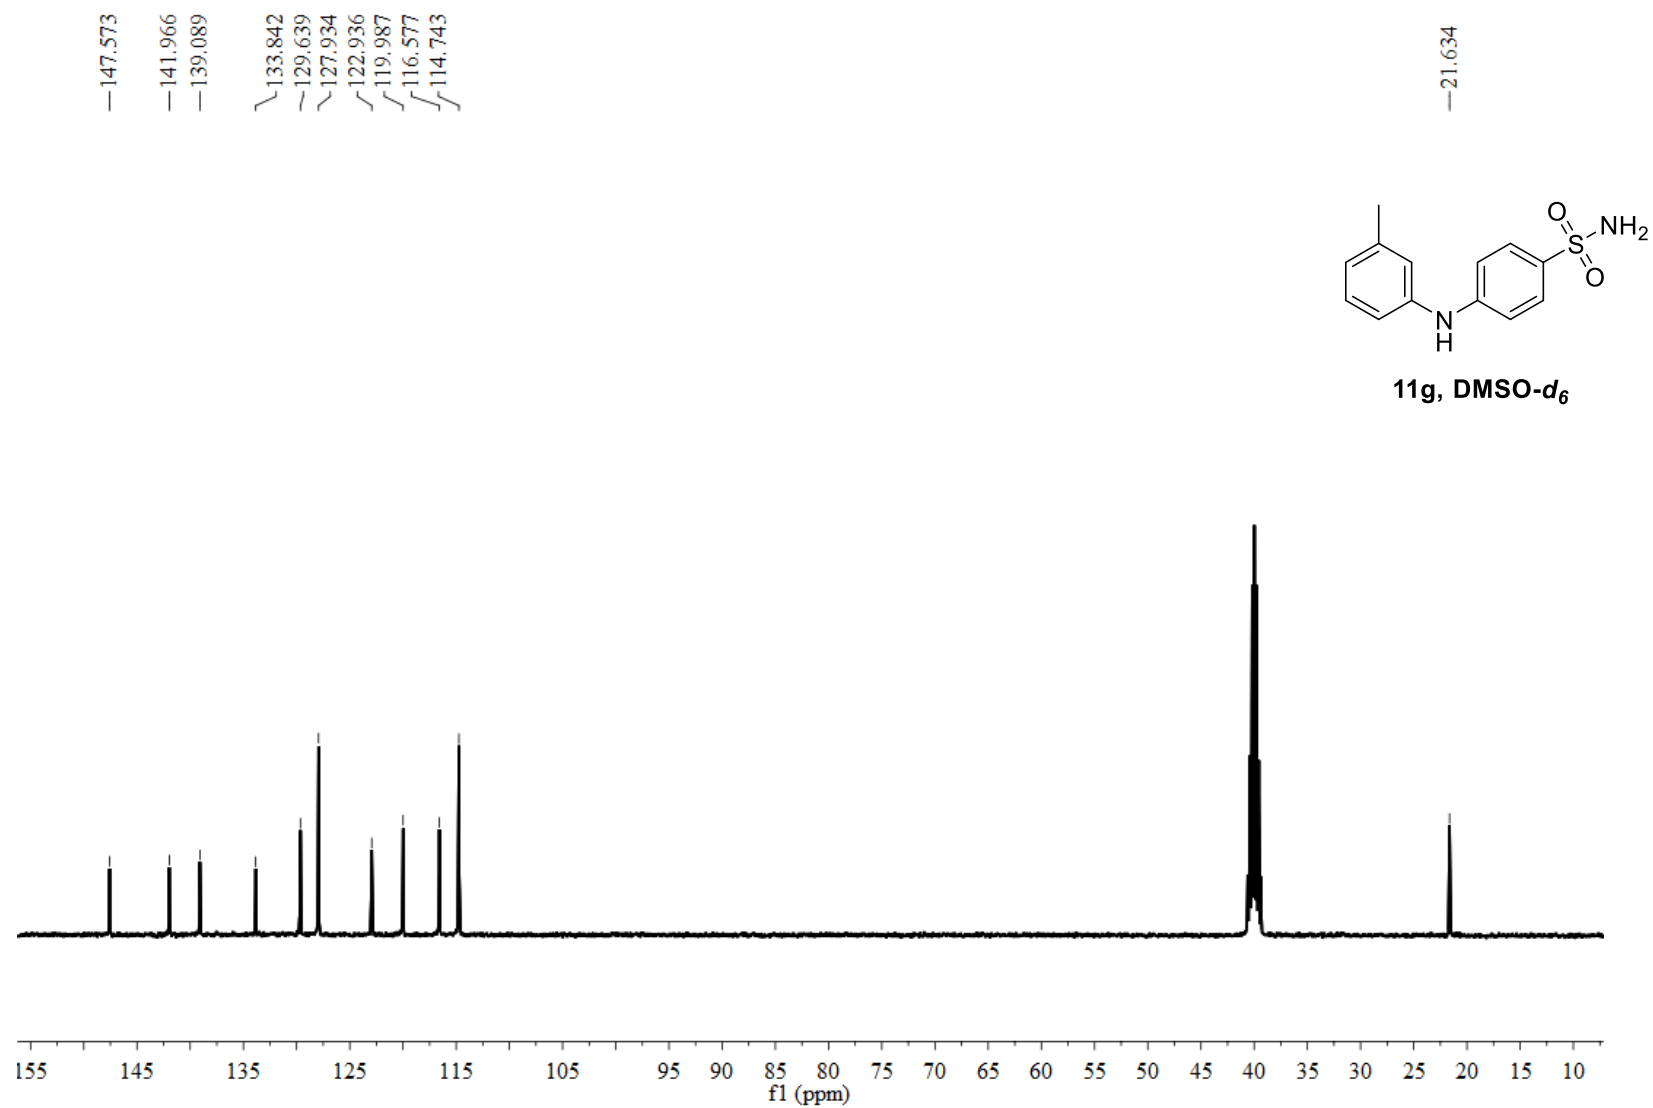

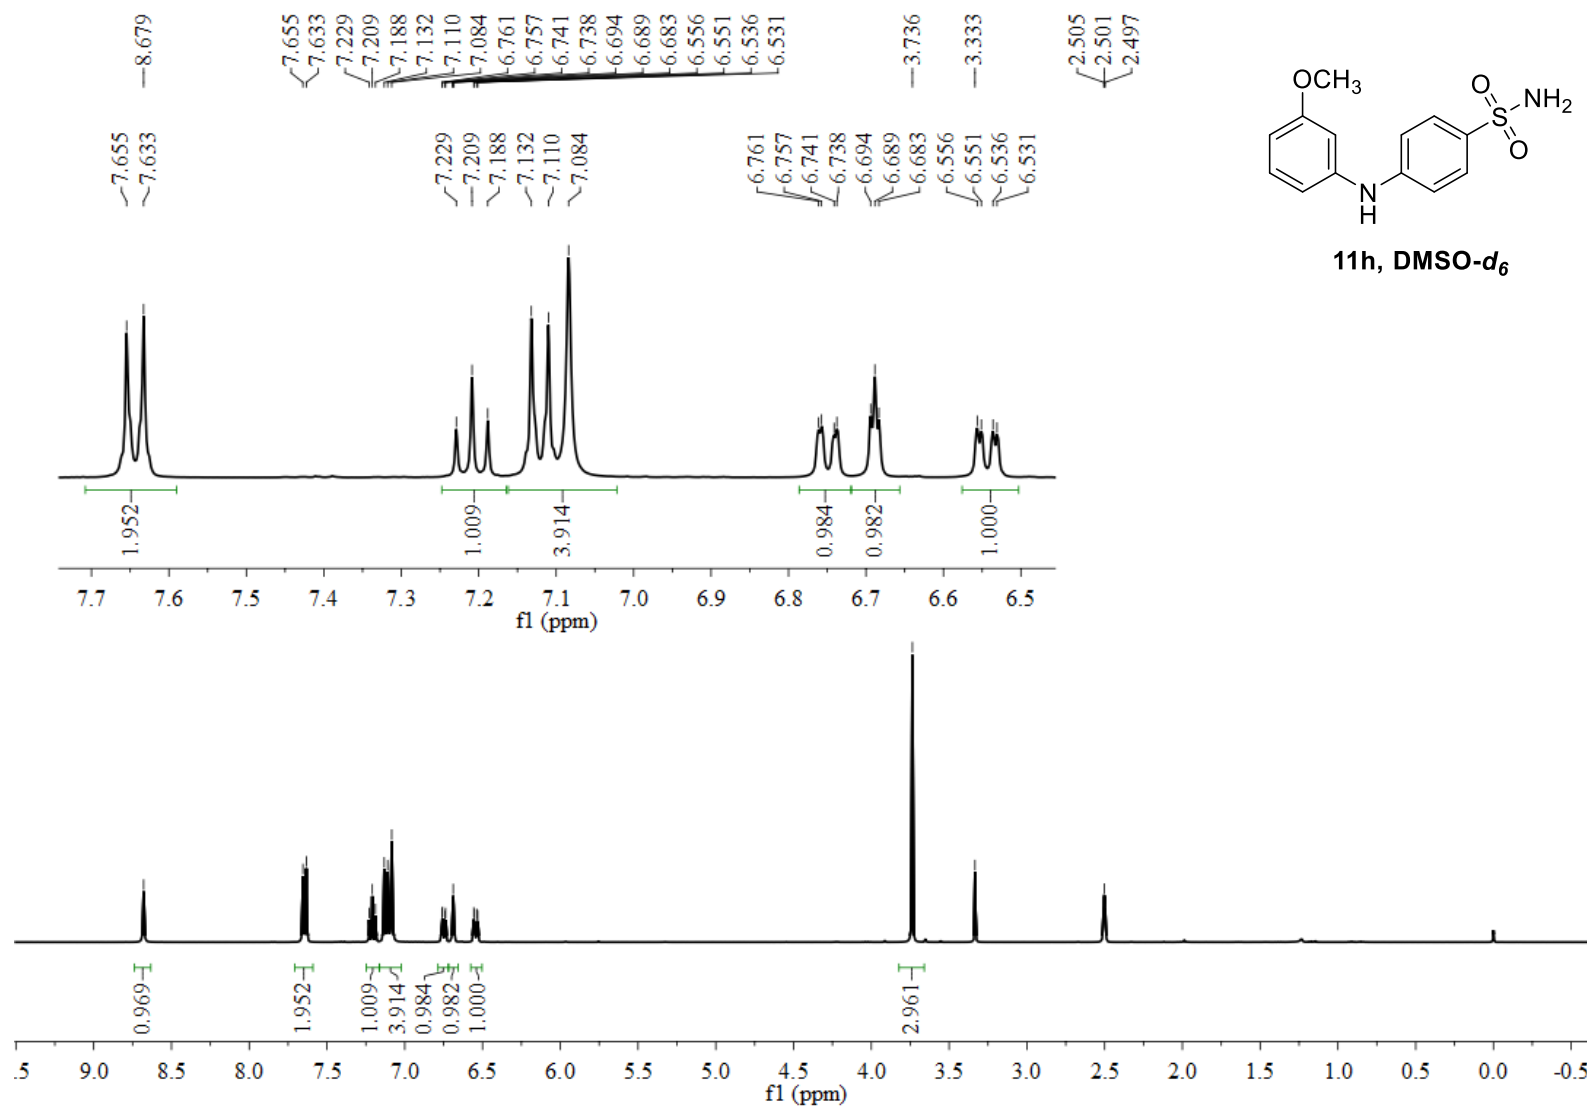

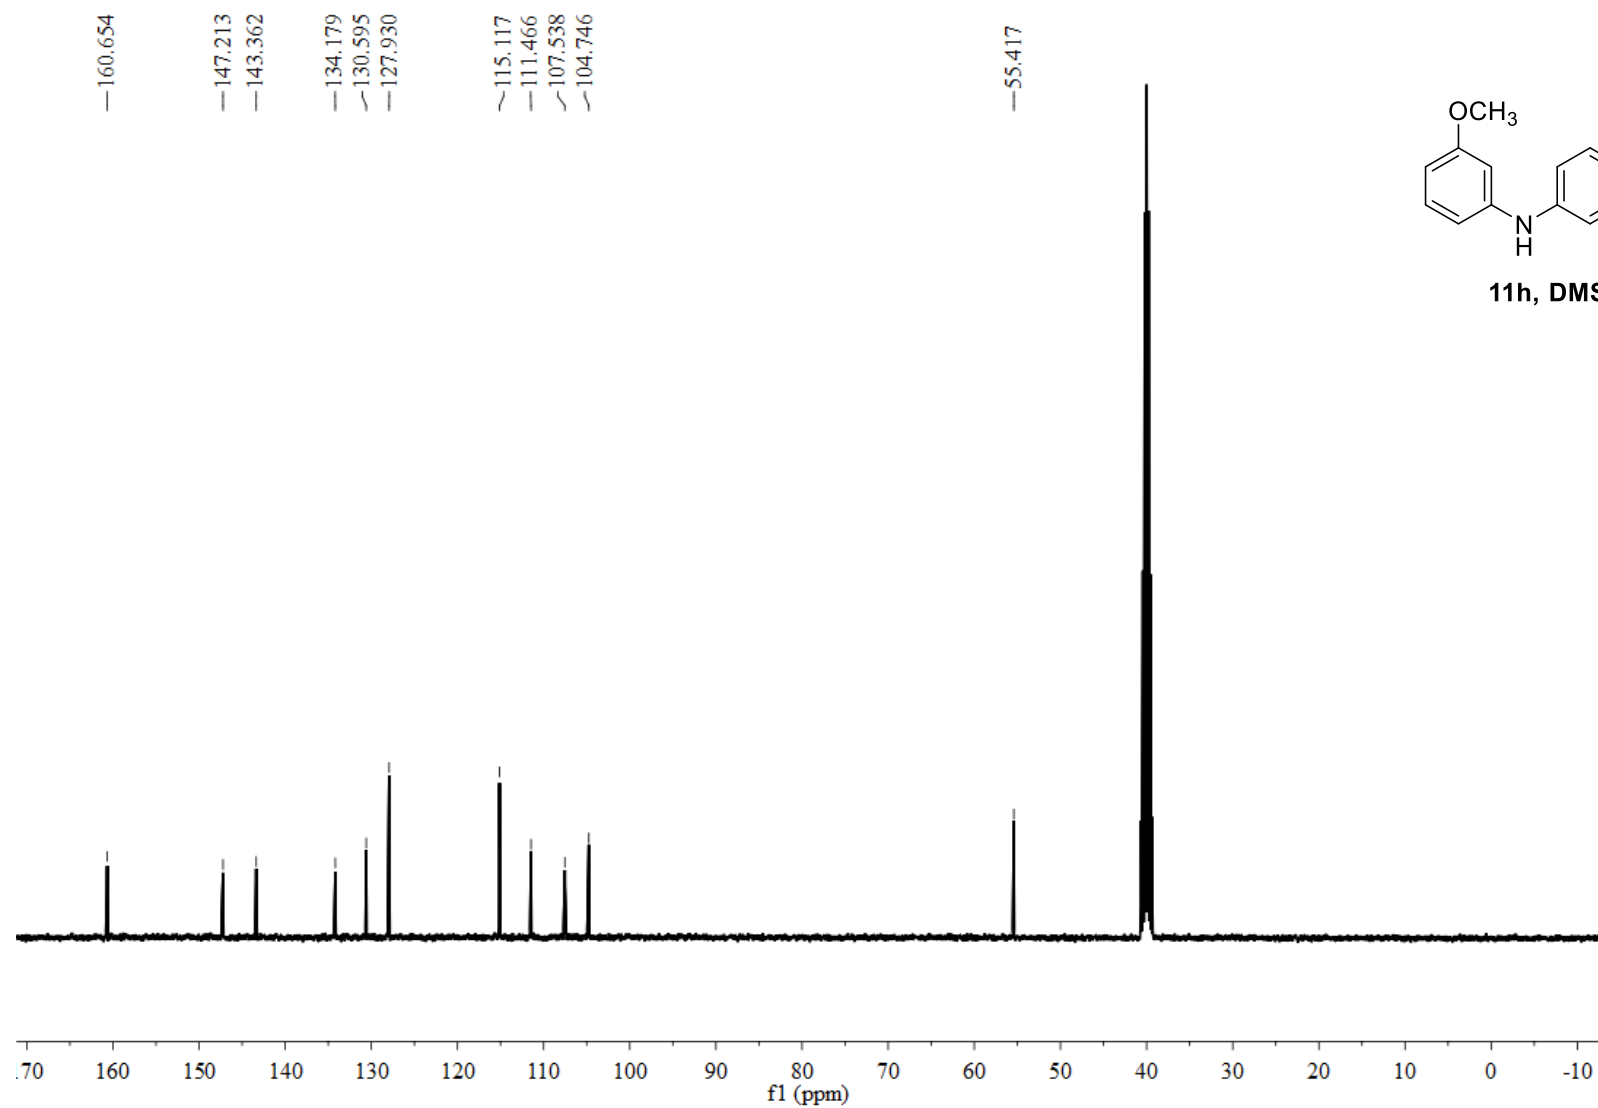

Supplement: c8qo01313f1.pdf [file c8qo01313f1.pdf]
